# Supplementary material for: Deciphering the genetic control of gene expression following Mycobacterium leprae antigen stimulation
Source: PLoS Genet. 2017 Aug 9;13(8):e1006952. doi: 10.1371/journal.pgen.1006952 (PMC5565194; doi:10.1371/journal.pgen.1006952)
Supplement: S1 Table — (XLSX) [file pgen.1006952.s007.xlsx]

## Sheet: Caption
S1 Table. Gene Ontology Analysis of Differentially Expressed Genes.
P-value' is the enrichment p-value computed according to the Hyper-Geometric model. This p-value is not corrected for multiple testing of 3934 GO terms.
'FDR q-value' is the correction of the above p-value for multiple testing using the Benjamini and Hochberg (1995) method.
Namely, for the ith term (ranked according to p-value) the FDR q-value is (p-value * number of GO terms) / i.
Enrichment (N, B, n, b) is defined as follows:
N - is the total number of genes
B - is the total number of genes associated with a specific GO term
n - is the number of genes in the top of the user's input list or in the target set when appropriate
b - is the number of genes in the intersection
Enrichment = (b/n) / (B/N)
Expected - Is the number of expected genes without enrichment
Genes: For each GO term you can see the list of associated genes that appear in the optimal top of the list.
Each gene name is specified by gene symbol followed by a short description of the gene.
These genes correspond to the genes that are part of the GO term and that are differentially expressed.

## Sheet: UpRegulated_Genes_GOPROCESS
GO Term	Description	P-value	FDR q-value	Enrichment	N	B	n	b	Expected	Genes
GO:0002376	immune system process	2.17e-32	2.88e-28	2.2	11488	1243	918	219	99.5455	[NCF2 - neutrophil cytosolic factor 2, NCF4 - neutrophil cytosolic factor 4, 40kda, BNIP3L - bcl2/adenovirus e1b 19kda interacting protein 3-like, DHX58 - dexh (asp-glu-x-his) box polypeptide 58, EMR1 - egf-like module containing, mucin-like, hormone receptor-like 1, MAP3K8 - mitogen-activated protein kinase kinase kinase 8, EBI3 - epstein-barr virus induced 3, SPG21 - spastic paraplegia 21 (auto…
GO:0043207	response to external biotic stimulus	6.24e-30	4.14e-26	3	11488	509	918	122	40.6667	[TNFRSF9 - tumor necrosis factor receptor superfamily, member 9, BNIP3L - bcl2/adenovirus e1b 19kda interacting protein 3-like, DHX58 - dexh (asp-glu-x-his) box polypeptide 58, PLAC8 - placenta-specific 8, CXCL9 - chemokine (c-x-c motif) ligand 9, ABCA1 - atp-binding cassette, sub-family a (abc1), member 1, TICAM1 - toll-like receptor adaptor molecule 1, IL12B - interleukin 12b (natural killer ce…
GO:0009605	response to external stimulus	1.92e-29	6.38e-26	2.44	11488	857	918	167	68.4426	[TNFRSF9 - tumor necrosis factor receptor superfamily, member 9, DHX58 - dexh (asp-glu-x-his) box polypeptide 58, BNIP3L - bcl2/adenovirus e1b 19kda interacting protein 3-like, PLAC8 - placenta-specific 8, CXCL9 - chemokine (c-x-c motif) ligand 9, DENND5A - denn/madd domain containing 5a, ABCA1 - atp-binding cassette, sub-family a (abc1), member 1, TICAM1 - toll-like receptor adaptor molecule 1, …
GO:0009607	response to biotic stimulus	1.62e-29	7.14e-26	2.94	11488	528	918	124	42.1769	[TNFRSF9 - tumor necrosis factor receptor superfamily, member 9, BNIP3L - bcl2/adenovirus e1b 19kda interacting protein 3-like, DHX58 - dexh (asp-glu-x-his) box polypeptide 58, PLAC8 - placenta-specific 8, CXCL9 - chemokine (c-x-c motif) ligand 9, ABCA1 - atp-binding cassette, sub-family a (abc1), member 1, TICAM1 - toll-like receptor adaptor molecule 1, IL12B - interleukin 12b (natural killer ce…
GO:0050896	response to stimulus	5.55e-28	1.47e-24	1.59	11488	3144	918	399	250.943	[TRIB3 - tribbles homolog 3 (drosophila), PLAC8 - placenta-specific 8, MAP3K8 - mitogen-activated protein kinase kinase kinase 8, SEC61B - sec61 beta subunit, ABCA1 - atp-binding cassette, sub-family a (abc1), member 1, IER2 - immediate early response 2, SPP1 - secreted phosphoprotein 1, ABCF1 - atp-binding cassette, sub-family f (gcn20), member 1, LDLR - low density lipoprotein receptor, LCP2 - …
GO:0002682	regulation of immune system process	9.64e-28	2.13e-24	2.27	11488	985	918	179	78.8546	[MICB - mhc class i polypeptide-related sequence b, DHX58 - dexh (asp-glu-x-his) box polypeptide 58, CD83 - cd83 molecule, MAP3K8 - mitogen-activated protein kinase kinase kinase 8, CDC42 - cell division cycle 42, EBI3 - epstein-barr virus induced 3, CXCL9 - chemokine (c-x-c motif) ligand 9, SPG21 - spastic paraplegia 21 (autosomal recessive, mast syndrome), ORM1 - orosomucoid 1, TICAM1 - toll-li…
GO:0006954	inflammatory response	2.32e-27	4.4e-24	3.59	11488	303	918	87	24.234	[TNFRSF9 - tumor necrosis factor receptor superfamily, member 9, CCL3L3 - chemokine (c-c motif) ligand 3-like 3, F12 - coagulation factor xii (hageman factor), CXCL9 - chemokine (c-x-c motif) ligand 9, SPP1 - secreted phosphoprotein 1, TICAM1 - toll-like receptor adaptor molecule 1, ORM1 - orosomucoid 1, IL23A - interleukin 23, alpha subunit p19, RELA - v-rel avian reticuloendotheliosis viral onc…
GO:0006950	response to stress	9.26e-27	1.36e-23	1.8	11488	1967	918	283	157.222	[NCF2 - neutrophil cytosolic factor 2, TRIB3 - tribbles homolog 3 (drosophila), BOK - bcl2-related ovarian killer, BNIP3L - bcl2/adenovirus e1b 19kda interacting protein 3-like, DHX58 - dexh (asp-glu-x-his) box polypeptide 58, PLAC8 - placenta-specific 8, MAP3K8 - mitogen-activated protein kinase kinase kinase 8, ABCA1 - atp-binding cassette, sub-family a (abc1), member 1, SEC61B - sec61 beta sub…
GO:0002237	response to molecule of bacterial origin	9.17e-27	1.52e-23	4.11	11488	219	918	72	17.5182	[TNFRSF9 - tumor necrosis factor receptor superfamily, member 9, SBNO2 - strawberry notch homolog 2 (drosophila), CXCL9 - chemokine (c-x-c motif) ligand 9, ABCA1 - atp-binding cassette, sub-family a (abc1), member 1, TICAM1 - toll-like receptor adaptor molecule 1, IL12B - interleukin 12b (natural killer cell stimulatory factor 2, cytotoxic lymphocyte maturation factor 2, p40), RELA - v-rel avian …
GO:0032496	response to lipopolysaccharide	1.34e-26	1.78e-23	4.19	11488	209	918	70	16.7064	[TNFRSF9 - tumor necrosis factor receptor superfamily, member 9, SBNO2 - strawberry notch homolog 2 (drosophila), CXCL9 - chemokine (c-x-c motif) ligand 9, ABCA1 - atp-binding cassette, sub-family a (abc1), member 1, TICAM1 - toll-like receptor adaptor molecule 1, IL12B - interleukin 12b (natural killer cell stimulatory factor 2, cytotoxic lymphocyte maturation factor 2, p40), RELA - v-rel avian …
GO:0006952	defense response	2.41e-26	2.91e-23	2.51	11488	714	918	143	56.9721	[MICB - mhc class i polypeptide-related sequence b, NCF2 - neutrophil cytosolic factor 2, TNFRSF9 - tumor necrosis factor receptor superfamily, member 9, BNIP3L - bcl2/adenovirus e1b 19kda interacting protein 3-like, DHX58 - dexh (asp-glu-x-his) box polypeptide 58, PLAC8 - placenta-specific 8, CD83 - cd83 molecule, CXCL9 - chemokine (c-x-c motif) ligand 9, SPP1 - secreted phosphoprotein 1, TICAM1…
GO:0002684	positive regulation of immune system process	7.4e-26	8.17e-23	2.58	11488	651	918	134	51.938	[MICB - mhc class i polypeptide-related sequence b, DHX58 - dexh (asp-glu-x-his) box polypeptide 58, CD83 - cd83 molecule, MAP3K8 - mitogen-activated protein kinase kinase kinase 8, CDC42 - cell division cycle 42, CXCL9 - chemokine (c-x-c motif) ligand 9, EBI3 - epstein-barr virus induced 3, SPG21 - spastic paraplegia 21 (autosomal recessive, mast syndrome), CD274 - cd274 molecule, TICAM1 - toll-…
GO:0007165	signal transduction	5.2e-25	5.3e-22	1.59	11488	2870	918	365	229.56	[NCF2 - neutrophil cytosolic factor 2, BOK - bcl2-related ovarian killer, TRIB3 - tribbles homolog 3 (drosophila), NCF4 - neutrophil cytosolic factor 4, 40kda, NDN - necdin, melanoma antigen (mage) family member, AGAP3 - arfgap with gtpase domain, ankyrin repeat and ph domain 3, EMR1 - egf-like module containing, mucin-like, hormone receptor-like 1, MAP3K8 - mitogen-activated protein kinase kinas…
GO:0042221	response to chemical	9.66e-24	9.15e-21	1.88	11488	1530	918	230	122.34	[TRIB3 - tribbles homolog 3 (drosophila), BNIP3L - bcl2/adenovirus e1b 19kda interacting protein 3-like, ABCA1 - atp-binding cassette, sub-family a (abc1), member 1, IER2 - immediate early response 2, SPP1 - secreted phosphoprotein 1, CD274 - cd274 molecule, TICAM1 - toll-like receptor adaptor molecule 1, RELA - v-rel avian reticuloendotheliosis viral oncogene homolog a, LDLR - low density lipopr…
GO:0010033	response to organic substance	2.23e-23	1.97e-20	2.01	11488	1222	918	196	97.5124	[TRIB3 - tribbles homolog 3 (drosophila), ABCA1 - atp-binding cassette, sub-family a (abc1), member 1, IER2 - immediate early response 2, SPP1 - secreted phosphoprotein 1, CD274 - cd274 molecule, TICAM1 - toll-like receptor adaptor molecule 1, RELA - v-rel avian reticuloendotheliosis viral oncogene homolog a, LDLR - low density lipoprotein receptor, RDX - radixin, GCGR - glucagon receptor, LGALS1…
GO:0006955	immune response	6.16e-22	5.1e-19	2.45	11488	633	918	124	50.6122	[NCF2 - neutrophil cytosolic factor 2, MICB - mhc class i polypeptide-related sequence b, NCF4 - neutrophil cytosolic factor 4, 40kda, TNFRSF9 - tumor necrosis factor receptor superfamily, member 9, DHX58 - dexh (asp-glu-x-his) box polypeptide 58, EMR1 - egf-like module containing, mucin-like, hormone receptor-like 1, CD83 - cd83 molecule, CXCL9 - chemokine (c-x-c motif) ligand 9, EBI3 - epstein-…
GO:0048584	positive regulation of response to stimulus	3.03e-21	2.36e-18	1.89	11488	1356	918	205	108.466	[BOK - bcl2-related ovarian killer, DHX58 - dexh (asp-glu-x-his) box polypeptide 58, TSPAN14 - tetraspanin 14, MAP3K8 - mitogen-activated protein kinase kinase kinase 8, TMEM101 - transmembrane protein 101, SPG21 - spastic paraplegia 21 (autosomal recessive, mast syndrome), TICAM1 - toll-like receptor adaptor molecule 1, RELA - v-rel avian reticuloendotheliosis viral oncogene homolog a, LDLR - lo…
GO:0033993	response to lipid	3.42e-21	2.52e-18	2.71	11488	467	918	101	37.2694	[MICB - mhc class i polypeptide-related sequence b, TNFRSF9 - tumor necrosis factor receptor superfamily, member 9, CXCL9 - chemokine (c-x-c motif) ligand 9, ABCA1 - atp-binding cassette, sub-family a (abc1), member 1, SPP1 - secreted phosphoprotein 1, TICAM1 - toll-like receptor adaptor molecule 1, IL12B - interleukin 12b (natural killer cell stimulatory factor 2, cytotoxic lymphocyte maturation…
GO:0050776	regulation of immune response	3.85e-20	2.69e-17	2.35	11488	655	918	123	52.3404	[MICB - mhc class i polypeptide-related sequence b, DHX58 - dexh (asp-glu-x-his) box polypeptide 58, CDC42 - cell division cycle 42, SPG21 - spastic paraplegia 21 (autosomal recessive, mast syndrome), TICAM1 - toll-like receptor adaptor molecule 1, IL12B - interleukin 12b (natural killer cell stimulatory factor 2, cytotoxic lymphocyte maturation factor 2, p40), RELA - v-rel avian reticuloendothel…
GO:1901700	response to oxygen-containing compound	7.73e-20	5.13e-17	2.14	11488	854	918	146	68.2243	[MICB - mhc class i polypeptide-related sequence b, TRIB3 - tribbles homolog 3 (drosophila), TNFRSF9 - tumor necrosis factor receptor superfamily, member 9, CXCL9 - chemokine (c-x-c motif) ligand 9, ABCA1 - atp-binding cassette, sub-family a (abc1), member 1, TICAM1 - toll-like receptor adaptor molecule 1, IL12B - interleukin 12b (natural killer cell stimulatory factor 2, cytotoxic lymphocyte mat…
GO:0048583	regulation of response to stimulus	1.29e-19	8.16e-17	1.58	11488	2442	918	308	194.937	[TRIB3 - tribbles homolog 3 (drosophila), BOK - bcl2-related ovarian killer, DHX58 - dexh (asp-glu-x-his) box polypeptide 58, TSPAN14 - tetraspanin 14, MAP3K8 - mitogen-activated protein kinase kinase kinase 8, SPG21 - spastic paraplegia 21 (autosomal recessive, mast syndrome), TMEM101 - transmembrane protein 101, ABCA1 - atp-binding cassette, sub-family a (abc1), member 1, TICAM1 - toll-like rec…
GO:0001817	regulation of cytokine production	1.89e-19	1.14e-16	2.68	11488	439	918	94	35.0746	[TNFRSF9 - tumor necrosis factor receptor superfamily, member 9, DHX58 - dexh (asp-glu-x-his) box polypeptide 58, CD83 - cd83 molecule, SOCS1 - suppressor of cytokine signaling 1, PRG2 - proteoglycan 2, bone marrow (natural killer cell activator, eosinophil granule major basic protein), EBI3 - epstein-barr virus induced 3, ORM1 - orosomucoid 1, IL12B - interleukin 12b (natural killer cell stimula…
GO:0019221	cytokine-mediated signaling pathway	2e-19	1.15e-16	2.94	11488	345	918	81	27.551	[TNFRSF9 - tumor necrosis factor receptor superfamily, member 9, CCL3L3 - chemokine (c-c motif) ligand 3-like 3, IFI35 - interferon-induced protein 35, IL15RA - interleukin 15 receptor, alpha, SOCS1 - suppressor of cytokine signaling 1, EBI3 - epstein-barr virus induced 3, CXCL9 - chemokine (c-x-c motif) ligand 9, IFI30 - interferon, gamma-inducible protein 30, IL12B - interleukin 12b (natural ki…
GO:0031347	regulation of defense response	5.23e-19	2.89e-16	2.55	11488	491	918	100	39.2157	[MICB - mhc class i polypeptide-related sequence b, DHX58 - dexh (asp-glu-x-his) box polypeptide 58, TICAM1 - toll-like receptor adaptor molecule 1, IL12B - interleukin 12b (natural killer cell stimulatory factor 2, cytotoxic lymphocyte maturation factor 2, p40), RELA - v-rel avian reticuloendotheliosis viral oncogene homolog a, LDLR - low density lipoprotein receptor, OSM - oncostatin m, IDO1 - …
GO:0010941	regulation of cell death	5.87e-19	3.11e-16	1.97	11488	1069	918	168	85.2792	[BOK - bcl2-related ovarian killer, TNFRSF9 - tumor necrosis factor receptor superfamily, member 9, BNIP3L - bcl2/adenovirus e1b 19kda interacting protein 3-like, PLAC8 - placenta-specific 8, CDC42 - cell division cycle 42, PSAP - prosaposin, CD274 - cd274 molecule, IL12B - interleukin 12b (natural killer cell stimulatory factor 2, cytotoxic lymphocyte maturation factor 2, p40), RELA - v-rel avia…
GO:0034097	response to cytokine	6.83e-19	3.48e-16	3.21	11488	269	918	69	21.4953	[CCL3L3 - chemokine (c-c motif) ligand 3-like 3, SBNO2 - strawberry notch homolog 2 (drosophila), CD274 - cd274 molecule, IL12B - interleukin 12b (natural killer cell stimulatory factor 2, cytotoxic lymphocyte maturation factor 2, p40), RELA - v-rel avian reticuloendotheliosis viral oncogene homolog a, SLC11A1 - solute carrier family 11 (proton-coupled divalent metal ion transporter), member 1, C…
GO:0070887	cellular response to chemical stimulus	8.04e-19	3.95e-16	2.08	11488	884	918	147	70.6731	[TRIB3 - tribbles homolog 3 (drosophila), BNIP3L - bcl2/adenovirus e1b 19kda interacting protein 3-like, PSAP - prosaposin, ABCA1 - atp-binding cassette, sub-family a (abc1), member 1, TICAM1 - toll-like receptor adaptor molecule 1, IL12B - interleukin 12b (natural killer cell stimulatory factor 2, cytotoxic lymphocyte maturation factor 2, p40), RELA - v-rel avian reticuloendotheliosis viral onco…
GO:0001819	positive regulation of cytokine production	2.3e-18	1.09e-15	3.05	11488	295	918	72	23.6066	[DHX58 - dexh (asp-glu-x-his) box polypeptide 58, CD83 - cd83 molecule, PRG2 - proteoglycan 2, bone marrow (natural killer cell activator, eosinophil granule major basic protein), EBI3 - epstein-barr virus induced 3, CD274 - cd274 molecule, TICAM1 - toll-like receptor adaptor molecule 1, IL12B - interleukin 12b (natural killer cell stimulatory factor 2, cytotoxic lymphocyte maturation factor 2, p…
GO:0071310	cellular response to organic substance	6.7e-18	3.06e-15	2.19	11488	713	918	125	57.0776	[TRIB3 - tribbles homolog 3 (drosophila), PSAP - prosaposin, ABCA1 - atp-binding cassette, sub-family a (abc1), member 1, TICAM1 - toll-like receptor adaptor molecule 1, IL12B - interleukin 12b (natural killer cell stimulatory factor 2, cytotoxic lymphocyte maturation factor 2, p40), RELA - v-rel avian reticuloendotheliosis viral oncogene homolog a, LDLR - low density lipoprotein receptor, CD58 -…
GO:0048518	positive regulation of biological process	1.73e-17	7.66e-15	1.42	11488	3476	918	394	277.465	[TRIB3 - tribbles homolog 3 (drosophila), ELL - elongation factor rna polymerase ii, PLAC8 - placenta-specific 8, MAP3K8 - mitogen-activated protein kinase kinase kinase 8, SPG21 - spastic paraplegia 21 (autosomal recessive, mast syndrome), TMEM101 - transmembrane protein 101, ABCA1 - atp-binding cassette, sub-family a (abc1), member 1, SPP1 - secreted phosphoprotein 1, LDLR - low density lipopro…
GO:0080134	regulation of response to stress	1.82e-17	7.8e-15	1.99	11488	941	918	150	75.3769	[BOK - bcl2-related ovarian killer, MICB - mhc class i polypeptide-related sequence b, DHX58 - dexh (asp-glu-x-his) box polypeptide 58, CDC42 - cell division cycle 42, PSAP - prosaposin, TICAM1 - toll-like receptor adaptor molecule 1, SDCBP - syndecan binding protein (syntenin), IL12B - interleukin 12b (natural killer cell stimulatory factor 2, cytotoxic lymphocyte maturation factor 2, p40), SPP1…
GO:0051716	cellular response to stimulus	2.05e-17	8.48e-15	1.7	11488	1668	918	226	132.941	[TRIB3 - tribbles homolog 3 (drosophila), BOK - bcl2-related ovarian killer, BNIP3L - bcl2/adenovirus e1b 19kda interacting protein 3-like, MAP3K8 - mitogen-activated protein kinase kinase kinase 8, ABCA1 - atp-binding cassette, sub-family a (abc1), member 1, SEC61B - sec61 beta subunit, TICAM1 - toll-like receptor adaptor molecule 1, RELA - v-rel avian reticuloendotheliosis viral oncogene homolo…
GO:0043067	regulation of programmed cell death	3.14e-17	1.26e-14	1.95	11488	1001	918	156	80	[BOK - bcl2-related ovarian killer, TNFRSF9 - tumor necrosis factor receptor superfamily, member 9, BNIP3L - bcl2/adenovirus e1b 19kda interacting protein 3-like, PLAC8 - placenta-specific 8, CDC42 - cell division cycle 42, CD274 - cd274 molecule, IL12B - interleukin 12b (natural killer cell stimulatory factor 2, cytotoxic lymphocyte maturation factor 2, p40), RELA - v-rel avian reticuloendotheli…
GO:0042981	regulation of apoptotic process	3.49e-17	1.36e-14	1.95	11488	993	918	155	79.4872	[BOK - bcl2-related ovarian killer, TNFRSF9 - tumor necrosis factor receptor superfamily, member 9, BNIP3L - bcl2/adenovirus e1b 19kda interacting protein 3-like, PLAC8 - placenta-specific 8, CDC42 - cell division cycle 42, CD274 - cd274 molecule, IL12B - interleukin 12b (natural killer cell stimulatory factor 2, cytotoxic lymphocyte maturation factor 2, p40), RELA - v-rel avian reticuloendotheli…
GO:0071222	cellular response to lipopolysaccharide	6.46e-17	2.45e-14	4.95	11488	91	918	36	7.27273	[ICAM1 - intercellular adhesion molecule 1, SBNO2 - strawberry notch homolog 2 (drosophila), LITAF - lipopolysaccharide-induced tnf factor, ABCA1 - atp-binding cassette, sub-family a (abc1), member 1, IL12B - interleukin 12b (natural killer cell stimulatory factor 2, cytotoxic lymphocyte maturation factor 2, p40), TICAM1 - toll-like receptor adaptor molecule 1, RELA - v-rel avian reticuloendothel…
GO:0071219	cellular response to molecule of bacterial origin	2.17e-16	8.01e-14	4.68	11488	99	918	37	7.90598	[ICAM1 - intercellular adhesion molecule 1, SBNO2 - strawberry notch homolog 2 (drosophila), LITAF - lipopolysaccharide-induced tnf factor, ABCA1 - atp-binding cassette, sub-family a (abc1), member 1, TICAM1 - toll-like receptor adaptor molecule 1, IL12B - interleukin 12b (natural killer cell stimulatory factor 2, cytotoxic lymphocyte maturation factor 2, p40), RELA - v-rel avian reticuloendothel…
GO:0032101	regulation of response to external stimulus	3.41e-16	1.22e-13	2.41	11488	489	918	94	39.0041	[MICB - mhc class i polypeptide-related sequence b, CCL3L3 - chemokine (c-c motif) ligand 3-like 3, DHX58 - dexh (asp-glu-x-his) box polypeptide 58, SBNO2 - strawberry notch homolog 2 (drosophila), F12 - coagulation factor xii (hageman factor), CXCL9 - chemokine (c-x-c motif) ligand 9, PLA2G7 - phospholipase a2, group vii (platelet-activating factor acetylhydrolase, plasma), IL12B - interleukin 1…
GO:0050778	positive regulation of immune response	4.43e-16	1.54e-13	2.51	11488	428	918	86	34.2629	[MICB - mhc class i polypeptide-related sequence b, CDC42 - cell division cycle 42, SPG21 - spastic paraplegia 21 (autosomal recessive, mast syndrome), IL12B - interleukin 12b (natural killer cell stimulatory factor 2, cytotoxic lymphocyte maturation factor 2, p40), TICAM1 - toll-like receptor adaptor molecule 1, IL23A - interleukin 23, alpha subunit p19, RELA - v-rel avian reticuloendotheliosis …
GO:0032103	positive regulation of response to external stimulus	5.37e-16	1.83e-13	3.46	11488	188	918	52	15.0289	[DHX58 - dexh (asp-glu-x-his) box polypeptide 58, CCL3L3 - chemokine (c-c motif) ligand 3-like 3, F12 - coagulation factor xii (hageman factor), CXCL9 - chemokine (c-x-c motif) ligand 9, PLA2G7 - phospholipase a2, group vii (platelet-activating factor acetylhydrolase, plasma), IL12B - interleukin 12b (natural killer cell stimulatory factor 2, cytotoxic lymphocyte maturation factor 2, p40), IL23A …
GO:0051707	response to other organism	8.17e-16	2.71e-13	2.67	11488	356	918	76	28.4644	[MR1 - major histocompatibility complex, class i-related, DHX58 - dexh (asp-glu-x-his) box polypeptide 58, BNIP3L - bcl2/adenovirus e1b 19kda interacting protein 3-like, PLAC8 - placenta-specific 8, PRG2 - proteoglycan 2, bone marrow (natural killer cell activator, eosinophil granule major basic protein), CXCL9 - chemokine (c-x-c motif) ligand 9, TICAM1 - toll-like receptor adaptor molecule 1, IL…
GO:0019725	cellular homeostasis	1.29e-15	4.19e-13	2.43	11488	459	918	89	36.6255	[NCF2 - neutrophil cytosolic factor 2, NCF4 - neutrophil cytosolic factor 4, 40kda, ATP6V1F - atpase, h+ transporting, lysosomal 14kda, v1 subunit f, ATP2A2 - atpase, ca++ transporting, cardiac muscle, slow twitch 2, NMB - neuromedin b, SLC31A2 - solute carrier family 31 (copper transporter), member 2, ATP1B3 - atpase, na+/k+ transporting, beta 3 polypeptide, SLC11A1 - solute carrier family 11 (p…
GO:0031349	positive regulation of defense response	2.28e-15	7.21e-13	2.88	11488	282	918	65	22.5694	[DHX58 - dexh (asp-glu-x-his) box polypeptide 58, CCL3L3 - chemokine (c-c motif) ligand 3-like 3, F12 - coagulation factor xii (hageman factor), PLA2G7 - phospholipase a2, group vii (platelet-activating factor acetylhydrolase, plasma), TICAM1 - toll-like receptor adaptor molecule 1, IL12B - interleukin 12b (natural killer cell stimulatory factor 2, cytotoxic lymphocyte maturation factor 2, p40), …
GO:0071216	cellular response to biotic stimulus	2.95e-15	8.9e-13	4.17	11488	117	918	39	9.35252	[ICAM1 - intercellular adhesion molecule 1, SBNO2 - strawberry notch homolog 2 (drosophila), LITAF - lipopolysaccharide-induced tnf factor, ABCA1 - atp-binding cassette, sub-family a (abc1), member 1, IL12B - interleukin 12b (natural killer cell stimulatory factor 2, cytotoxic lymphocyte maturation factor 2, p40), TICAM1 - toll-like receptor adaptor molecule 1, RELA - v-rel avian reticuloendothel…
GO:0002252	immune effector process	2.94e-15	9.06e-13	2.65	11488	349	918	74	27.9245	[MICB - mhc class i polypeptide-related sequence b, DHX58 - dexh (asp-glu-x-his) box polypeptide 58, BNIP3L - bcl2/adenovirus e1b 19kda interacting protein 3-like, SBNO2 - strawberry notch homolog 2 (drosophila), CDC42 - cell division cycle 42, CXCL9 - chemokine (c-x-c motif) ligand 9, TICAM1 - toll-like receptor adaptor molecule 1, IL12B - interleukin 12b (natural killer cell stimulatory factor …
GO:0065008	regulation of biological quality	2.54e-14	7.49e-12	1.53	11488	2097	918	257	167.974	[NCF2 - neutrophil cytosolic factor 2, BOK - bcl2-related ovarian killer, NCF4 - neutrophil cytosolic factor 4, 40kda, BNIP3L - bcl2/adenovirus e1b 19kda interacting protein 3-like, NDN - necdin, melanoma antigen (mage) family member, HSD17B4 - hydroxysteroid (17-beta) dehydrogenase 4, SPIRE1 - spire actin nucleation factor 1, SLC31A2 - solute carrier family 31 (copper transporter), member 2, ABC…
GO:0050727	regulation of inflammatory response	2.63e-14	7.59e-12	3.17	11488	205	918	52	16.4038	[CCL3L3 - chemokine (c-c motif) ligand 3-like 3, SBNO2 - strawberry notch homolog 2 (drosophila), F12 - coagulation factor xii (hageman factor), PLA2G7 - phospholipase a2, group vii (platelet-activating factor acetylhydrolase, plasma), IL12B - interleukin 12b (natural killer cell stimulatory factor 2, cytotoxic lymphocyte maturation factor 2, p40), RELA - v-rel avian reticuloendotheliosis viral o…
GO:0006873	cellular ion homeostasis	4.35e-14	1.23e-11	2.65	11488	321	918	68	25.6604	[ATP6V1F - atpase, h+ transporting, lysosomal 14kda, v1 subunit f, ATP2A2 - atpase, ca++ transporting, cardiac muscle, slow twitch 2, NMB - neuromedin b, SLC31A2 - solute carrier family 31 (copper transporter), member 2, ATP1B3 - atpase, na+/k+ transporting, beta 3 polypeptide, SLC11A1 - solute carrier family 11 (proton-coupled divalent metal ion transporter), member 1, ERO1L - ero1-like (s. cere…
GO:0051240	positive regulation of multicellular organismal process	4.7e-14	1.3e-11	1.88	11488	925	918	139	73.9362	[DHX58 - dexh (asp-glu-x-his) box polypeptide 58, CD83 - cd83 molecule, CDC42 - cell division cycle 42, EBI3 - epstein-barr virus induced 3, TICAM1 - toll-like receptor adaptor molecule 1, CD274 - cd274 molecule, IL12B - interleukin 12b (natural killer cell stimulatory factor 2, cytotoxic lymphocyte maturation factor 2, p40), SPP1 - secreted phosphoprotein 1, SDCBP - syndecan binding protein (syn…
GO:1902531	regulation of intracellular signal transduction	8.15e-14	2.2e-11	1.75	11488	1188	918	166	94.8571	[BOK - bcl2-related ovarian killer, TRIB3 - tribbles homolog 3 (drosophila), DHX58 - dexh (asp-glu-x-his) box polypeptide 58, SEC13 - sec13 homolog (s. cerevisiae), MAP3K8 - mitogen-activated protein kinase kinase kinase 8, CDC42 - cell division cycle 42, PSAP - prosaposin, CXCL9 - chemokine (c-x-c motif) ligand 9, TMEM101 - transmembrane protein 101, ABCA1 - atp-binding cassette, sub-family a (a…
GO:0055082	cellular chemical homeostasis	9.74e-14	2.58e-11	2.49	11488	372	918	74	29.7189	[ATP6V1F - atpase, h+ transporting, lysosomal 14kda, v1 subunit f, ATP2A2 - atpase, ca++ transporting, cardiac muscle, slow twitch 2, NMB - neuromedin b, SLC31A2 - solute carrier family 31 (copper transporter), member 2, ATP1B3 - atpase, na+/k+ transporting, beta 3 polypeptide, SLC11A1 - solute carrier family 11 (proton-coupled divalent metal ion transporter), member 1, ERO1L - ero1-like (s. cere…
GO:0044763	single-organism cellular process	1.03e-13	2.67e-11	1.24	11488	5683	918	561	452.419	[WTAP - wilms tumor 1 associated protein, PLAC8 - placenta-specific 8, GBA3 - glucosidase, beta, acid 3, MAP3K8 - mitogen-activated protein kinase kinase kinase 8, SPRR1A - small proline-rich protein 1a, SLC31A2 - solute carrier family 31 (copper transporter), member 2, IER2 - immediate early response 2, ABCA1 - atp-binding cassette, sub-family a (abc1), member 1, SPP1 - secreted phosphoprotein 1…
GO:0007166	cell surface receptor signaling pathway	1.1e-13	2.81e-11	1.69	11488	1359	918	183	108.284	[NCF2 - neutrophil cytosolic factor 2, MICB - mhc class i polypeptide-related sequence b, BOK - bcl2-related ovarian killer, NCF4 - neutrophil cytosolic factor 4, 40kda, TNFRSF9 - tumor necrosis factor receptor superfamily, member 9, ATP6V1F - atpase, h+ transporting, lysosomal 14kda, v1 subunit f, NDN - necdin, melanoma antigen (mage) family member, EMR1 - egf-like module containing, mucin-like,…
GO:0030968	endoplasmic reticulum unfolded protein response	1.21e-13	3.02e-11	4.45	11488	90	918	32	7.19101	[C19orf10 - chromosome 19 open reading frame 10, SERP1 - stress-associated endoplasmic reticulum protein 1, DNAJB9 - dnaj (hsp40) homolog, subfamily b, member 9, SEC61B - sec61 beta subunit, NFE2L2 - nuclear factor (erythroid-derived 2)-like 2, ZBTB17 - zinc finger and btb domain containing 17, ERO1L - ero1-like (s. cerevisiae), DNAJC3 - dnaj (hsp40) homolog, subfamily c, member 3, ATP6V0D1 - atp…
GO:1902533	positive regulation of intracellular signal transduction	2.39e-13	5.88e-11	2.07	11488	636	918	105	50.7246	[BOK - bcl2-related ovarian killer, DHX58 - dexh (asp-glu-x-his) box polypeptide 58, SEC13 - sec13 homolog (s. cerevisiae), MAP3K8 - mitogen-activated protein kinase kinase kinase 8, CDC42 - cell division cycle 42, PSAP - prosaposin, CXCL9 - chemokine (c-x-c motif) ligand 9, TMEM101 - transmembrane protein 101, SDCBP - syndecan binding protein (syntenin), TICAM1 - toll-like receptor adaptor molec…
GO:0045937	positive regulation of phosphate metabolic process	3.16e-13	7.48e-11	2.03	11488	665	918	108	53.202	[MAP3K8 - mitogen-activated protein kinase kinase kinase 8, CDC42 - cell division cycle 42, PSAP - prosaposin, CXCL9 - chemokine (c-x-c motif) ligand 9, ABCA1 - atp-binding cassette, sub-family a (abc1), member 1, SDCBP - syndecan binding protein (syntenin), IL12B - interleukin 12b (natural killer cell stimulatory factor 2, cytotoxic lymphocyte maturation factor 2, p40), SDC4 - syndecan 4, OSM - …
GO:0034976	response to endoplasmic reticulum stress	3.22e-13	7.49e-11	3.36	11488	164	918	44	13.0952	[TRIB3 - tribbles homolog 3 (drosophila), C19orf10 - chromosome 19 open reading frame 10, FLOT1 - flotillin 1, SERP1 - stress-associated endoplasmic reticulum protein 1, ATP2A2 - atpase, ca++ transporting, cardiac muscle, slow twitch 2, JUN - jun proto-oncogene, DNAJB9 - dnaj (hsp40) homolog, subfamily b, member 9, SEC61B - sec61 beta subunit, NFE2L2 - nuclear factor (erythroid-derived 2)-like 2,…
GO:0010562	positive regulation of phosphorus metabolic process	3.16e-13	7.61e-11	2.03	11488	665	918	108	53.202	[MAP3K8 - mitogen-activated protein kinase kinase kinase 8, CDC42 - cell division cycle 42, PSAP - prosaposin, CXCL9 - chemokine (c-x-c motif) ligand 9, ABCA1 - atp-binding cassette, sub-family a (abc1), member 1, SDCBP - syndecan binding protein (syntenin), IL12B - interleukin 12b (natural killer cell stimulatory factor 2, cytotoxic lymphocyte maturation factor 2, p40), SDC4 - syndecan 4, OSM - …
GO:0009966	regulation of signal transduction	3.67e-13	8.12e-11	1.55	11488	1837	918	228	147.097	[TRIB3 - tribbles homolog 3 (drosophila), BOK - bcl2-related ovarian killer, DHX58 - dexh (asp-glu-x-his) box polypeptide 58, TSPAN14 - tetraspanin 14, MAP3K8 - mitogen-activated protein kinase kinase kinase 8, TMEM101 - transmembrane protein 101, ABCA1 - atp-binding cassette, sub-family a (abc1), member 1, TICAM1 - toll-like receptor adaptor molecule 1, RELA - v-rel avian reticuloendotheliosis v…
GO:0030003	cellular cation homeostasis	3.67e-13	8.24e-11	2.61	11488	312	918	65	24.9042	[ATP6V1F - atpase, h+ transporting, lysosomal 14kda, v1 subunit f, ATP2A2 - atpase, ca++ transporting, cardiac muscle, slow twitch 2, NMB - neuromedin b, SLC31A2 - solute carrier family 31 (copper transporter), member 2, ATP1B3 - atpase, na+/k+ transporting, beta 3 polypeptide, SLC11A1 - solute carrier family 11 (proton-coupled divalent metal ion transporter), member 1, ERO1L - ero1-like (s. cere…
GO:0071345	cellular response to cytokine stimulus	3.66e-13	8.37e-11	3.29	11488	171	918	45	13.6778	[ICAM1 - intercellular adhesion molecule 1, CCR7 - chemokine (c-c motif) receptor 7, CCL3L3 - chemokine (c-c motif) ligand 3-like 3, SBNO2 - strawberry notch homolog 2 (drosophila), STAT1 - signal transducer and activator of transcription 1, 91kda, IL12B - interleukin 12b (natural killer cell stimulatory factor 2, cytotoxic lymphocyte maturation factor 2, p40), RELA - v-rel avian reticuloendothel…
GO:0048522	positive regulation of cellular process	4.29e-13	9.32e-11	1.38	11488	3165	918	349	252.899	[TRIB3 - tribbles homolog 3 (drosophila), BOK - bcl2-related ovarian killer, ELL - elongation factor rna polymerase ii, DHX58 - dexh (asp-glu-x-his) box polypeptide 58, BNIP3L - bcl2/adenovirus e1b 19kda interacting protein 3-like, NDN - necdin, melanoma antigen (mage) family member, TSPAN14 - tetraspanin 14, PLAC8 - placenta-specific 8, MAP3K8 - mitogen-activated protein kinase kinase kinase 8, …
GO:0010647	positive regulation of cell communication	4.82e-13	1.03e-10	1.78	11488	1057	918	150	84.2697	[BOK - bcl2-related ovarian killer, DHX58 - dexh (asp-glu-x-his) box polypeptide 58, TSPAN14 - tetraspanin 14, SEC13 - sec13 homolog (s. cerevisiae), MAP3K8 - mitogen-activated protein kinase kinase kinase 8, CDC42 - cell division cycle 42, PSAP - prosaposin, CXCL9 - chemokine (c-x-c motif) ligand 9, TMEM101 - transmembrane protein 101, TICAM1 - toll-like receptor adaptor molecule 1, SDCBP - synd…
GO:0023051	regulation of signaling	5.23e-13	1.1e-10	1.51	11488	2033	918	246	162.914	[TRIB3 - tribbles homolog 3 (drosophila), BOK - bcl2-related ovarian killer, DHX58 - dexh (asp-glu-x-his) box polypeptide 58, TSPAN14 - tetraspanin 14, MAP3K8 - mitogen-activated protein kinase kinase kinase 8, TMEM101 - transmembrane protein 101, ABCA1 - atp-binding cassette, sub-family a (abc1), member 1, TICAM1 - toll-like receptor adaptor molecule 1, RELA - v-rel avian reticuloendotheliosis v…
GO:0040017	positive regulation of locomotion	5.44e-13	1.13e-10	2.61	11488	307	918	64	24.5211	[CXCL9 - chemokine (c-x-c motif) ligand 9, PLA2G7 - phospholipase a2, group vii (platelet-activating factor acetylhydrolase, plasma), CD274 - cd274 molecule, SDCBP - syndecan binding protein (syntenin), SEMA4A - sema domain, immunoglobulin domain (ig), transmembrane domain (tm) and short cytoplasmic domain, (semaphorin) 4a, IL23A - interleukin 23, alpha subunit p19, PTK2B - protein tyrosine kinas…
GO:0044699	single-organism process	6.02e-13	1.23e-10	1.19	11488	6685	918	635	533.613	[ELL - elongation factor rna polymerase ii, WTAP - wilms tumor 1 associated protein, GBA3 - glucosidase, beta, acid 3, PLAC8 - placenta-specific 8, MAP3K8 - mitogen-activated protein kinase kinase kinase 8, SPRR1A - small proline-rich protein 1a, SLC31A2 - solute carrier family 31 (copper transporter), member 2, IER2 - immediate early response 2, ABCA1 - atp-binding cassette, sub-family a (abc1),…
GO:0010646	regulation of cell communication	6.5e-13	1.31e-10	1.52	11488	2005	918	243	159.868	[TRIB3 - tribbles homolog 3 (drosophila), BOK - bcl2-related ovarian killer, DHX58 - dexh (asp-glu-x-his) box polypeptide 58, TSPAN14 - tetraspanin 14, MAP3K8 - mitogen-activated protein kinase kinase kinase 8, TMEM101 - transmembrane protein 101, ABCA1 - atp-binding cassette, sub-family a (abc1), member 1, TICAM1 - toll-like receptor adaptor molecule 1, RELA - v-rel avian reticuloendotheliosis v…
GO:0023056	positive regulation of signaling	7.66e-13	1.52e-10	1.77	11488	1063	918	150	84.7458	[BOK - bcl2-related ovarian killer, DHX58 - dexh (asp-glu-x-his) box polypeptide 58, TSPAN14 - tetraspanin 14, SEC13 - sec13 homolog (s. cerevisiae), MAP3K8 - mitogen-activated protein kinase kinase kinase 8, CDC42 - cell division cycle 42, PSAP - prosaposin, CXCL9 - chemokine (c-x-c motif) ligand 9, TMEM101 - transmembrane protein 101, TICAM1 - toll-like receptor adaptor molecule 1, SDCBP - synd…
GO:0030335	positive regulation of cell migration	8.57e-13	1.67e-10	2.68	11488	280	918	60	22.3881	[CXCL9 - chemokine (c-x-c motif) ligand 9, PLA2G7 - phospholipase a2, group vii (platelet-activating factor acetylhydrolase, plasma), SDCBP - syndecan binding protein (syntenin), CD274 - cd274 molecule, SEMA4A - sema domain, immunoglobulin domain (ig), transmembrane domain (tm) and short cytoplasmic domain, (semaphorin) 4a, IL23A - interleukin 23, alpha subunit p19, PTK2B - protein tyrosine kinas…
GO:0042592	homeostatic process	1.09e-12	2.1e-10	1.87	11488	841	918	126	67.3797	[NCF2 - neutrophil cytosolic factor 2, NCF4 - neutrophil cytosolic factor 4, 40kda, ATP6V1F - atpase, h+ transporting, lysosomal 14kda, v1 subunit f, NDN - necdin, melanoma antigen (mage) family member, SLC31A2 - solute carrier family 31 (copper transporter), member 2, ABCA1 - atp-binding cassette, sub-family a (abc1), member 1, LDLR - low density lipoprotein receptor, CLIC4 - chloride intracellu…
GO:0045088	regulation of innate immune response	1.39e-12	2.64e-10	2.65	11488	283	918	60	22.6415	[DHX58 - dexh (asp-glu-x-his) box polypeptide 58, SOCS1 - suppressor of cytokine signaling 1, TICAM1 - toll-like receptor adaptor molecule 1, IL12B - interleukin 12b (natural killer cell stimulatory factor 2, cytotoxic lymphocyte maturation factor 2, p40), RELA - v-rel avian reticuloendotheliosis viral oncogene homolog a, GBP5 - guanylate binding protein 5, IFNGR2 - interferon gamma receptor 2 (i…
GO:0009967	positive regulation of signal transduction	1.96e-12	3.65e-10	1.78	11488	989	918	141	79.2135	[BOK - bcl2-related ovarian killer, DHX58 - dexh (asp-glu-x-his) box polypeptide 58, TSPAN14 - tetraspanin 14, SEC13 - sec13 homolog (s. cerevisiae), MAP3K8 - mitogen-activated protein kinase kinase kinase 8, CDC42 - cell division cycle 42, PSAP - prosaposin, CXCL9 - chemokine (c-x-c motif) ligand 9, TMEM101 - transmembrane protein 101, TICAM1 - toll-like receptor adaptor molecule 1, IL12B - inte…
GO:2000147	positive regulation of cell motility	2.24e-12	4.07e-10	2.63	11488	286	918	60	22.8137	[CXCL9 - chemokine (c-x-c motif) ligand 9, PLA2G7 - phospholipase a2, group vii (platelet-activating factor acetylhydrolase, plasma), SDCBP - syndecan binding protein (syntenin), CD274 - cd274 molecule, IL23A - interleukin 23, alpha subunit p19, SEMA4A - sema domain, immunoglobulin domain (ig), transmembrane domain (tm) and short cytoplasmic domain, (semaphorin) 4a, PTK2B - protein tyrosine kinas…
GO:0051049	regulation of transport	2.23e-12	4.11e-10	1.71	11488	1155	918	158	92.3977	[BOK - bcl2-related ovarian killer, TRIB3 - tribbles homolog 3 (drosophila), TNFRSF9 - tumor necrosis factor receptor superfamily, member 9, BNIP3L - bcl2/adenovirus e1b 19kda interacting protein 3-like, PNKD - paroxysmal nonkinesigenic dyskinesia, CDC42 - cell division cycle 42, CXCL9 - chemokine (c-x-c motif) ligand 9, SLC31A2 - solute carrier family 31 (copper transporter), member 2, ABCA1 - a…
GO:0050801	ion homeostasis	3.35e-12	6e-10	2.39	11488	366	918	70	29.2887	[ATP6V1F - atpase, h+ transporting, lysosomal 14kda, v1 subunit f, ATP2A2 - atpase, ca++ transporting, cardiac muscle, slow twitch 2, NMB - neuromedin b, SLC31A2 - solute carrier family 31 (copper transporter), member 2, ATP1B3 - atpase, na+/k+ transporting, beta 3 polypeptide, SLC11A1 - solute carrier family 11 (proton-coupled divalent metal ion transporter), member 1, ERO1L - ero1-like (s. cere…
GO:0032879	regulation of localization	3.5e-12	6.19e-10	1.57	11488	1615	918	203	129.299	[TRIB3 - tribbles homolog 3 (drosophila), BOK - bcl2-related ovarian killer, BNIP3L - bcl2/adenovirus e1b 19kda interacting protein 3-like, SLC31A2 - solute carrier family 31 (copper transporter), member 2, ABCA1 - atp-binding cassette, sub-family a (abc1), member 1, CD274 - cd274 molecule, SPINK1 - serine peptidase inhibitor, kazal type 1, RDX - radixin, LGALS3 - lectin, galactoside-binding, sol…
GO:0034612	response to tumor necrosis factor	4.02e-12	7.02e-10	4.08	11488	95	918	31	7.59804	[ICAM1 - intercellular adhesion molecule 1, CCL3L3 - chemokine (c-c motif) ligand 3-like 3, UBD - ubiquitin d, RELA - v-rel avian reticuloendotheliosis viral oncogene homolog a, NFE2L2 - nuclear factor (erythroid-derived 2)-like 2, CXCL16 - chemokine (c-x-c motif) ligand 16, CD58 - cd58 molecule, CD14 - cd14 molecule, PTGS2 - prostaglandin-endoperoxide synthase 2 (prostaglandin g/h synthase and c…
GO:0022407	regulation of cell-cell adhesion	5.29e-12	9.11e-10	2.6	11488	284	918	59	22.6923	[MAP3K8 - mitogen-activated protein kinase kinase kinase 8, CD83 - cd83 molecule, CDC42 - cell division cycle 42, EBI3 - epstein-barr virus induced 3, CD274 - cd274 molecule, IL12B - interleukin 12b (natural killer cell stimulatory factor 2, cytotoxic lymphocyte maturation factor 2, p40), SDC4 - syndecan 4, IL23A - interleukin 23, alpha subunit p19, HLA-DRA - major histocompatibility complex, cla…
GO:0050729	positive regulation of inflammatory response	6.47e-12	1.1e-09	4.38	11488	80	918	28	6.39269	[FFAR2 - free fatty acid receptor 2, CCL3L3 - chemokine (c-c motif) ligand 3-like 3, CCR7 - chemokine (c-c motif) receptor 7, F12 - coagulation factor xii (hageman factor), PLA2G7 - phospholipase a2, group vii (platelet-activating factor acetylhydrolase, plasma), IL12B - interleukin 12b (natural killer cell stimulatory factor 2, cytotoxic lymphocyte maturation factor 2, p40), IL23A - interleukin …
GO:0051272	positive regulation of cellular component movement	6.58e-12	1.11e-09	2.56	11488	293	918	60	23.4375	[CXCL9 - chemokine (c-x-c motif) ligand 9, PLA2G7 - phospholipase a2, group vii (platelet-activating factor acetylhydrolase, plasma), SDCBP - syndecan binding protein (syntenin), CD274 - cd274 molecule, SEMA4A - sema domain, immunoglobulin domain (ig), transmembrane domain (tm) and short cytoplasmic domain, (semaphorin) 4a, IL23A - interleukin 23, alpha subunit p19, PTK2B - protein tyrosine kinas…
GO:0098771	inorganic ion homeostasis	7.41e-12	1.23e-09	2.37	11488	364	918	69	29.1139	[ATP6V1F - atpase, h+ transporting, lysosomal 14kda, v1 subunit f, ATP2A2 - atpase, ca++ transporting, cardiac muscle, slow twitch 2, NMB - neuromedin b, SLC31A2 - solute carrier family 31 (copper transporter), member 2, ATP1B3 - atpase, na+/k+ transporting, beta 3 polypeptide, SLC11A1 - solute carrier family 11 (proton-coupled divalent metal ion transporter), member 1, ERO1L - ero1-like (s. cere…
GO:0014070	response to organic cyclic compound	9.1e-12	1.49e-09	2.18	11488	464	918	81	37.156	[CD83 - cd83 molecule, ABCA1 - atp-binding cassette, sub-family a (abc1), member 1, SPP1 - secreted phosphoprotein 1, TICAM1 - toll-like receptor adaptor molecule 1, RELA - v-rel avian reticuloendotheliosis viral oncogene homolog a, ACSL1 - acyl-coa synthetase long-chain family member 1, CTNNA1 - catenin (cadherin-associated protein), alpha 1, 102kda, PTK2B - protein tyrosine kinase 2 beta, LGALS…
GO:0042127	regulation of cell proliferation	9.42e-12	1.52e-09	1.75	11488	1000	918	140	80	[BOK - bcl2-related ovarian killer, TNFRSF9 - tumor necrosis factor receptor superfamily, member 9, NDN - necdin, melanoma antigen (mage) family member, PLAC8 - placenta-specific 8, CDC42 - cell division cycle 42, EBI3 - epstein-barr virus induced 3, BTG3 - btg family, member 3, CXCL9 - chemokine (c-x-c motif) ligand 9, CD274 - cd274 molecule, TICAM1 - toll-like receptor adaptor molecule 1, IL12B…
GO:0002694	regulation of leukocyte activation	1.06e-11	1.7e-09	2.43	11488	335	918	65	26.749	[MAP3K8 - mitogen-activated protein kinase kinase kinase 8, CD83 - cd83 molecule, CDC42 - cell division cycle 42, EBI3 - epstein-barr virus induced 3, CD274 - cd274 molecule, TICAM1 - toll-like receptor adaptor molecule 1, IL12B - interleukin 12b (natural killer cell stimulatory factor 2, cytotoxic lymphocyte maturation factor 2, p40), SDC4 - syndecan 4, IL23A - interleukin 23, alpha subunit p19,…
GO:0050865	regulation of cell activation	1.1e-11	1.71e-09	2.37	11488	359	918	68	28.692	[MAP3K8 - mitogen-activated protein kinase kinase kinase 8, CD83 - cd83 molecule, CDC42 - cell division cycle 42, EBI3 - epstein-barr virus induced 3, CD274 - cd274 molecule, TICAM1 - toll-like receptor adaptor molecule 1, IL12B - interleukin 12b (natural killer cell stimulatory factor 2, cytotoxic lymphocyte maturation factor 2, p40), SDC4 - syndecan 4, IL23A - interleukin 23, alpha subunit p19,…
GO:0048878	chemical homeostasis	1.11e-11	1.72e-09	2.06	11488	560	918	92	44.6602	[ATP6V1F - atpase, h+ transporting, lysosomal 14kda, v1 subunit f, ATP2A2 - atpase, ca++ transporting, cardiac muscle, slow twitch 2, NMB - neuromedin b, USF2 - upstream transcription factor 2, c-fos interacting, SLC31A2 - solute carrier family 31 (copper transporter), member 2, ABCA1 - atp-binding cassette, sub-family a (abc1), member 1, ATP1B3 - atpase, na+/k+ transporting, beta 3 polypeptide, …
GO:0002687	positive regulation of leukocyte migration	1.1e-11	1.73e-09	4.17	11488	87	918	29	6.95444	[ICAM1 - intercellular adhesion molecule 1, CCR7 - chemokine (c-c motif) receptor 7, PTAFR - platelet-activating factor receptor, CXCL9 - chemokine (c-x-c motif) ligand 9, ADAM17 - adam metallopeptidase domain 17, PLA2G7 - phospholipase a2, group vii (platelet-activating factor acetylhydrolase, plasma), CCR1 - chemokine (c-c motif) receptor 1, IL23A - interleukin 23, alpha subunit p19, PTK2B - pr…
GO:0070555	response to interleukin-1	1.17e-11	1.79e-09	4.74	11488	66	918	25	5.27426	[ICAM1 - intercellular adhesion molecule 1, CCL3L3 - chemokine (c-c motif) ligand 3-like 3, SNCA - synuclein, alpha (non a4 component of amyloid precursor), RELA - v-rel avian reticuloendotheliosis viral oncogene homolog a, CEBPB - ccaat/enhancer binding protein (c/ebp), beta, CHI3L1 - chitinase 3-like 1 (cartilage glycoprotein-39), ZC3H12A - zinc finger ccch-type containing 12a, CCL19 - chemokin…
GO:0009719	response to endogenous stimulus	1.19e-11	1.79e-09	1.94	11488	676	918	105	54.1237	[TRIB3 - tribbles homolog 3 (drosophila), IER2 - immediate early response 2, ABCA1 - atp-binding cassette, sub-family a (abc1), member 1, SPP1 - secreted phosphoprotein 1, RELA - v-rel avian reticuloendotheliosis viral oncogene homolog a, RDX - radixin, GCGR - glucagon receptor, EPM2AIP1 - epm2a (laforin) interacting protein 1, P2RX4 - purinergic receptor p2x, ligand-gated ion channel, 4, PSMB2 -…
GO:0001934	positive regulation of protein phosphorylation	1.58e-11	2.36e-09	2.02	11488	581	918	94	46.5347	[CCL3L3 - chemokine (c-c motif) ligand 3-like 3, MAP3K8 - mitogen-activated protein kinase kinase kinase 8, CDC42 - cell division cycle 42, PSAP - prosaposin, IL12B - interleukin 12b (natural killer cell stimulatory factor 2, cytotoxic lymphocyte maturation factor 2, p40), SDCBP - syndecan binding protein (syntenin), SDC4 - syndecan 4, IL23A - interleukin 23, alpha subunit p19, ACSL1 - acyl-coa s…
GO:0042327	positive regulation of phosphorylation	1.66e-11	2.45e-09	2	11488	608	918	97	48.5	[MAP3K8 - mitogen-activated protein kinase kinase kinase 8, CDC42 - cell division cycle 42, PSAP - prosaposin, SDCBP - syndecan binding protein (syntenin), IL12B - interleukin 12b (natural killer cell stimulatory factor 2, cytotoxic lymphocyte maturation factor 2, p40), SDC4 - syndecan 4, OSM - oncostatin m, LCP2 - lymphocyte cytosolic protein 2 (sh2 domain containing leukocyte protein of 76kda),…
GO:0098542	defense response to other organism	1.71e-11	2.5e-09	2.61	11488	269	918	56	21.4559	[MR1 - major histocompatibility complex, class i-related, DHX58 - dexh (asp-glu-x-his) box polypeptide 58, BNIP3L - bcl2/adenovirus e1b 19kda interacting protein 3-like, PLAC8 - placenta-specific 8, PRG2 - proteoglycan 2, bone marrow (natural killer cell activator, eosinophil granule major basic protein), CXCL9 - chemokine (c-x-c motif) ligand 9, TICAM1 - toll-like receptor adaptor molecule 1, IL…
GO:0055080	cation homeostasis	1.86e-11	2.67e-09	2.36	11488	355	918	67	28.3898	[ATP6V1F - atpase, h+ transporting, lysosomal 14kda, v1 subunit f, ATP2A2 - atpase, ca++ transporting, cardiac muscle, slow twitch 2, NMB - neuromedin b, SLC31A2 - solute carrier family 31 (copper transporter), member 2, ATP1B3 - atpase, na+/k+ transporting, beta 3 polypeptide, SLC11A1 - solute carrier family 11 (proton-coupled divalent metal ion transporter), member 1, ERO1L - ero1-like (s. cere…
GO:0065009	regulation of molecular function	2.21e-11	3.12e-09	1.49	11488	1910	918	228	153.02	[TRIB3 - tribbles homolog 3 (drosophila), BOK - bcl2-related ovarian killer, NCF4 - neutrophil cytosolic factor 4, 40kda, ELL - elongation factor rna polymerase ii, AGAP3 - arfgap with gtpase domain, ankyrin repeat and ph domain 3, MAP3K8 - mitogen-activated protein kinase kinase kinase 8, TICAM1 - toll-like receptor adaptor molecule 1, RELA - v-rel avian reticuloendotheliosis viral oncogene homo…
GO:0001932	regulation of protein phosphorylation	2.2e-11	3.14e-09	1.8	11488	868	918	125	69.4444	[TRIB3 - tribbles homolog 3 (drosophila), MAP3K8 - mitogen-activated protein kinase kinase kinase 8, CDC42 - cell division cycle 42, PSAP - prosaposin, IL12B - interleukin 12b (natural killer cell stimulatory factor 2, cytotoxic lymphocyte maturation factor 2, p40), SDCBP - syndecan binding protein (syntenin), SDC4 - syndecan 4, SPINK1 - serine peptidase inhibitor, kazal type 1, OSM - oncostatin …
GO:0006810	transport	3.14e-11	4.38e-09	1.41	11488	2471	918	279	197.872	[SPIRE1 - spire actin nucleation factor 1, TRAK1 - trafficking protein, kinesin binding 1, SLC31A2 - solute carrier family 31 (copper transporter), member 2, ABCA1 - atp-binding cassette, sub-family a (abc1), member 1, SEC61B - sec61 beta subunit, CD274 - cd274 molecule, ABCF1 - atp-binding cassette, sub-family f (gcn20), member 1, LDLR - low density lipoprotein receptor, TMED2 - transmembrane em…
GO:0035556	intracellular signal transduction	3.48e-11	4.8e-09	1.71	11488	1047	918	143	83.6257	[BOK - bcl2-related ovarian killer, TRIB3 - tribbles homolog 3 (drosophila), AGAP3 - arfgap with gtpase domain, ankyrin repeat and ph domain 3, MAP3K8 - mitogen-activated protein kinase kinase kinase 8, CDC42 - cell division cycle 42, TICAM1 - toll-like receptor adaptor molecule 1, SDCBP - syndecan binding protein (syntenin), RIN2 - ras and rab interactor 2, RELA - v-rel avian reticuloendothelios…
GO:0051234	establishment of localization	3.83e-11	5.23e-09	1.4	11488	2564	918	287	205	[TSPAN14 - tetraspanin 14, SPIRE1 - spire actin nucleation factor 1, TRAK1 - trafficking protein, kinesin binding 1, SLC31A2 - solute carrier family 31 (copper transporter), member 2, ABCA1 - atp-binding cassette, sub-family a (abc1), member 1, SEC61B - sec61 beta subunit, CD274 - cd274 molecule, ABCF1 - atp-binding cassette, sub-family f (gcn20), member 1, LDLR - low density lipoprotein receptor…
GO:0030155	regulation of cell adhesion	3.87e-11	5.24e-09	2.15	11488	460	918	79	36.7442	[CD83 - cd83 molecule, MAP3K8 - mitogen-activated protein kinase kinase kinase 8, CDC42 - cell division cycle 42, EBI3 - epstein-barr virus induced 3, IL12B - interleukin 12b (natural killer cell stimulatory factor 2, cytotoxic lymphocyte maturation factor 2, p40), CD274 - cd274 molecule, SDC4 - syndecan 4, IL23A - interleukin 23, alpha subunit p19, HLA-DRA - major histocompatibility complex, cla…
GO:0051050	positive regulation of transport	4.28e-11	5.74e-09	1.97	11488	609	918	96	48.731	[BOK - bcl2-related ovarian killer, CDC42 - cell division cycle 42, NMB - neuromedin b, CXCL9 - chemokine (c-x-c motif) ligand 9, ABCA1 - atp-binding cassette, sub-family a (abc1), member 1, ATP1B3 - atpase, na+/k+ transporting, beta 3 polypeptide, RHOQ - ras homolog family member q, IL12B - interleukin 12b (natural killer cell stimulatory factor 2, cytotoxic lymphocyte maturation factor 2, p40),…
GO:1903037	regulation of leukocyte cell-cell adhesion	4.63e-11	6.08e-09	2.68	11488	238	918	51	19.0299	[CD83 - cd83 molecule, MAP3K8 - mitogen-activated protein kinase kinase kinase 8, CDC42 - cell division cycle 42, EBI3 - epstein-barr virus induced 3, IL12B - interleukin 12b (natural killer cell stimulatory factor 2, cytotoxic lymphocyte maturation factor 2, p40), CD274 - cd274 molecule, SDC4 - syndecan 4, IL23A - interleukin 23, alpha subunit p19, HLA-DRA - major histocompatibility complex, cla…
GO:0051247	positive regulation of protein metabolic process	4.61e-11	6.11e-09	1.7	11488	1051	918	143	84.1176	[BOK - bcl2-related ovarian killer, TRIB3 - tribbles homolog 3 (drosophila), MAP3K8 - mitogen-activated protein kinase kinase kinase 8, CDC42 - cell division cycle 42, PSAP - prosaposin, EBI3 - epstein-barr virus induced 3, TICAM1 - toll-like receptor adaptor molecule 1, IL12B - interleukin 12b (natural killer cell stimulatory factor 2, cytotoxic lymphocyte maturation factor 2, p40), SDCBP - synd…
GO:0071356	cellular response to tumor necrosis factor	6.63e-11	8.62e-09	4.28	11488	76	918	26	6.07477	[ICAM1 - intercellular adhesion molecule 1, CCL3L3 - chemokine (c-c motif) ligand 3-like 3, RELA - v-rel avian reticuloendotheliosis viral oncogene homolog a, NFE2L2 - nuclear factor (erythroid-derived 2)-like 2, CD58 - cd58 molecule, CHI3L1 - chitinase 3-like 1 (cartilage glycoprotein-39), PID1 - phosphotyrosine interaction domain containing 1, ZC3H12A - zinc finger ccch-type containing 12a, CCL…
GO:0009615	response to virus	7.11e-11	9.07e-09	2.9	11488	190	918	44	15.1724	[DDIT4 - dna-damage-inducible transcript 4, BNIP3L - bcl2/adenovirus e1b 19kda interacting protein 3-like, DHX58 - dexh (asp-glu-x-his) box polypeptide 58, ATG7 - autophagy related 7, STAT2 - signal transducer and activator of transcription 2, 113kda, STAT1 - signal transducer and activator of transcription 1, 91kda, CXCL9 - chemokine (c-x-c motif) ligand 9, TICAM1 - toll-like receptor adaptor mo…
GO:0002685	regulation of leukocyte migration	7.06e-11	9.09e-09	3.53	11488	117	918	33	9.34844	[ICAM1 - intercellular adhesion molecule 1, CCR7 - chemokine (c-c motif) receptor 7, PTAFR - platelet-activating factor receptor, CXCL9 - chemokine (c-x-c motif) ligand 9, ADAM17 - adam metallopeptidase domain 17, PLA2G7 - phospholipase a2, group vii (platelet-activating factor acetylhydrolase, plasma), CCR1 - chemokine (c-c motif) receptor 1, IL23A - interleukin 23, alpha subunit p19, PTGER4 - p…
GO:0060548	negative regulation of cell death	8.23e-11	1.04e-08	1.94	11488	625	918	97	50	[BNIP3L - bcl2/adenovirus e1b 19kda interacting protein 3-like, PLAC8 - placenta-specific 8, PSAP - prosaposin, RELA - v-rel avian reticuloendotheliosis viral oncogene homolog a, ANXA5 - annexin a5, CD59 - cd59 molecule, complement regulatory protein, IDO1 - indoleamine 2,3-dioxygenase 1, LGALS3 - lectin, galactoside-binding, soluble, 3, CCL19 - chemokine (c-c motif) ligand 19, CD44 - cd44 molecu…
GO:1901701	cellular response to oxygen-containing compound	8.32e-11	1.04e-08	2.12	11488	467	918	79	37.2642	[TRIB3 - tribbles homolog 3 (drosophila), SBNO2 - strawberry notch homolog 2 (drosophila), SOCS1 - suppressor of cytokine signaling 1, ABCA1 - atp-binding cassette, sub-family a (abc1), member 1, RHOQ - ras homolog family member q, IL12B - interleukin 12b (natural killer cell stimulatory factor 2, cytotoxic lymphocyte maturation factor 2, p40), TICAM1 - toll-like receptor adaptor molecule 1, RELA…
GO:0071396	cellular response to lipid	9.42e-11	1.17e-08	2.76	11488	213	918	47	17.029	[ICAM1 - intercellular adhesion molecule 1, FFAR2 - free fatty acid receptor 2, SBNO2 - strawberry notch homolog 2 (drosophila), PTAFR - platelet-activating factor receptor, LITAF - lipopolysaccharide-induced tnf factor, ABCA1 - atp-binding cassette, sub-family a (abc1), member 1, TICAM1 - toll-like receptor adaptor molecule 1, IL12B - interleukin 12b (natural killer cell stimulatory factor 2, cy…
GO:0002764	immune response-regulating signaling pathway	1.01e-10	1.24e-08	2.37	11488	328	918	62	26.1603	[MICB - mhc class i polypeptide-related sequence b, CDC42 - cell division cycle 42, SPG21 - spastic paraplegia 21 (autosomal recessive, mast syndrome), TICAM1 - toll-like receptor adaptor molecule 1, RELA - v-rel avian reticuloendotheliosis viral oncogene homolog a, HLA-DRA - major histocompatibility complex, class ii, dr alpha, HLA-DQB1 - major histocompatibility complex, class ii, dq beta 1, LC…
GO:0019220	regulation of phosphate metabolic process	1.13e-10	1.38e-08	1.68	11488	1064	918	143	85.119	[TRIB3 - tribbles homolog 3 (drosophila), ELL - elongation factor rna polymerase ii, MAP3K8 - mitogen-activated protein kinase kinase kinase 8, CDC42 - cell division cycle 42, PSAP - prosaposin, CXCL9 - chemokine (c-x-c motif) ligand 9, ABCA1 - atp-binding cassette, sub-family a (abc1), member 1, IL12B - interleukin 12b (natural killer cell stimulatory factor 2, cytotoxic lymphocyte maturation fa…
GO:0033554	cellular response to stress	1.19e-10	1.43e-08	1.69	11488	1045	918	141	83.432	[BOK - bcl2-related ovarian killer, TRIB3 - tribbles homolog 3 (drosophila), BNIP3L - bcl2/adenovirus e1b 19kda interacting protein 3-like, MAP3K8 - mitogen-activated protein kinase kinase kinase 8, SEC61B - sec61 beta subunit, RELA - v-rel avian reticuloendotheliosis viral oncogene homolog a, MAP1LC3B - microtubule-associated protein 1 light chain 3 beta, ZBTB17 - zinc finger and btb domain cont…
GO:0051174	regulation of phosphorus metabolic process	1.21e-10	1.45e-08	1.68	11488	1065	918	143	85.119	[TRIB3 - tribbles homolog 3 (drosophila), ELL - elongation factor rna polymerase ii, MAP3K8 - mitogen-activated protein kinase kinase kinase 8, CDC42 - cell division cycle 42, PSAP - prosaposin, CXCL9 - chemokine (c-x-c motif) ligand 9, ABCA1 - atp-binding cassette, sub-family a (abc1), member 1, IL12B - interleukin 12b (natural killer cell stimulatory factor 2, cytotoxic lymphocyte maturation fa…
GO:0034341	response to interferon-gamma	1.32e-10	1.56e-08	4.83	11488	57	918	22	4.55487	[CCL19 - chemokine (c-c motif) ligand 19, CCL3L3 - chemokine (c-c motif) ligand 3-like 3, UBD - ubiquitin d, SNCA - synuclein, alpha (non a4 component of amyloid precursor), CCL8 - chemokine (c-c motif) ligand 8, ASS1 - argininosuccinate synthase 1, CCL2 - chemokine (c-c motif) ligand 2, DAPK1 - death-associated protein kinase 1, IL12B - interleukin 12b (natural killer cell stimulatory factor 2, …
GO:0071347	cellular response to interleukin-1	1.49e-10	1.75e-08	5.53	11488	43	918	19	3.4358	[ICAM1 - intercellular adhesion molecule 1, ZC3H12A - zinc finger ccch-type containing 12a, CCL19 - chemokine (c-c motif) ligand 19, CCL3L3 - chemokine (c-c motif) ligand 3-like 3, CCL8 - chemokine (c-c motif) ligand 8, NFKB1 - nuclear factor of kappa light polypeptide gene enhancer in b-cells 1, CCL2 - chemokine (c-c motif) ligand 2, ANKRD1 - ankyrin repeat domain 1 (cardiac muscle), CCL3 - chem…
GO:0042325	regulation of phosphorylation	1.55e-10	1.8e-08	1.73	11488	932	918	129	74.5665	[TRIB3 - tribbles homolog 3 (drosophila), MAP3K8 - mitogen-activated protein kinase kinase kinase 8, CDC42 - cell division cycle 42, PSAP - prosaposin, IL12B - interleukin 12b (natural killer cell stimulatory factor 2, cytotoxic lymphocyte maturation factor 2, p40), SDCBP - syndecan binding protein (syntenin), SDC4 - syndecan 4, SPINK1 - serine peptidase inhibitor, kazal type 1, OSM - oncostatin …
GO:0051704	multi-organism process	1.84e-10	2.12e-08	1.77	11488	848	918	120	67.7966	[MICB - mhc class i polypeptide-related sequence b, DHX58 - dexh (asp-glu-x-his) box polypeptide 58, BNIP3L - bcl2/adenovirus e1b 19kda interacting protein 3-like, PLAC8 - placenta-specific 8, CDC42 - cell division cycle 42, CXCL9 - chemokine (c-x-c motif) ligand 9, IL12B - interleukin 12b (natural killer cell stimulatory factor 2, cytotoxic lymphocyte maturation factor 2, p40), TICAM1 - toll-lik…
GO:1901698	response to nitrogen compound	1.94e-10	2.22e-08	2.08	11488	475	918	79	37.9808	[TRIB3 - tribbles homolog 3 (drosophila), ATP2A2 - atpase, ca++ transporting, cardiac muscle, slow twitch 2, SOCS1 - suppressor of cytokine signaling 1, RHOQ - ras homolog family member q, TICAM1 - toll-like receptor adaptor molecule 1, RELA - v-rel avian reticuloendotheliosis viral oncogene homolog a, CTNNA1 - catenin (cadherin-associated protein), alpha 1, 102kda, JAG1 - jagged 1, PTK2B - prote…
GO:0050900	leukocyte migration	2.09e-10	2.37e-08	2.81	11488	196	918	44	15.6584	[SIRPA - signal-regulatory protein alpha, ICAM1 - intercellular adhesion molecule 1, FFAR2 - free fatty acid receptor 2, CCR7 - chemokine (c-c motif) receptor 7, CCL3L3 - chemokine (c-c motif) ligand 3-like 3, CDC42 - cell division cycle 42, ATP1B3 - atpase, na+/k+ transporting, beta 3 polypeptide, CCR1 - chemokine (c-c motif) receptor 1, GRB2 - growth factor receptor-bound protein 2, CXCL16 - ch…
GO:0001775	cell activation	2.11e-10	2.37e-08	2.21	11488	391	918	69	31.2217	[MICB - mhc class i polypeptide-related sequence b, SBNO2 - strawberry notch homolog 2 (drosophila), EBI3 - epstein-barr virus induced 3, TICAM1 - toll-like receptor adaptor molecule 1, IL12B - interleukin 12b (natural killer cell stimulatory factor 2, cytotoxic lymphocyte maturation factor 2, p40), SEMA4A - sema domain, immunoglobulin domain (ig), transmembrane domain (tm) and short cytoplasmic …
GO:0048519	negative regulation of biological process	2.23e-10	2.48e-08	1.34	11488	3056	918	327	244.03	[TRIB3 - tribbles homolog 3 (drosophila), ELL - elongation factor rna polymerase ii, DHX58 - dexh (asp-glu-x-his) box polypeptide 58, BNIP3L - bcl2/adenovirus e1b 19kda interacting protein 3-like, NDN - necdin, melanoma antigen (mage) family member, PLAC8 - placenta-specific 8, CAB39L - calcium binding protein 39-like, CREG1 - cellular repressor of e1a-stimulated genes 1, BTG3 - btg family, membe…
GO:0009612	response to mechanical stimulus	2.44e-10	2.7e-08	3.24	11488	135	918	35	10.8025	[JUN - jun proto-oncogene, STAT1 - signal transducer and activator of transcription 1, 91kda, JUNB - jun b proto-oncogene, DENND5A - denn/madd domain containing 5a, RELA - v-rel avian reticuloendotheliosis viral oncogene homolog a, PTGER4 - prostaglandin e receptor 4 (subtype ep4), BTG2 - btg family, member 2, PTK2B - protein tyrosine kinase 2 beta, TNFSF14 - tumor necrosis factor (ligand) superf…
GO:0031325	positive regulation of cellular metabolic process	2.71e-10	2.97e-08	1.46	11488	1905	918	223	152.74	[TRIB3 - tribbles homolog 3 (drosophila), BOK - bcl2-related ovarian killer, ELL - elongation factor rna polymerase ii, NDN - necdin, melanoma antigen (mage) family member, PLAC8 - placenta-specific 8, MAP3K8 - mitogen-activated protein kinase kinase kinase 8, EBI3 - epstein-barr virus induced 3, ABCA1 - atp-binding cassette, sub-family a (abc1), member 1, TICAM1 - toll-like receptor adaptor mole…
GO:0043408	regulation of MAPK cascade	3.07e-10	3.34e-08	2.11	11488	445	918	75	35.545	[TRIB3 - tribbles homolog 3 (drosophila), CCL3L3 - chemokine (c-c motif) ligand 3-like 3, MAP3K8 - mitogen-activated protein kinase kinase kinase 8, CDC42 - cell division cycle 42, PSAP - prosaposin, SDCBP - syndecan binding protein (syntenin), OSM - oncostatin m, PTK2B - protein tyrosine kinase 2 beta, ATF3 - activating transcription factor 3, CHI3L1 - chitinase 3-like 1 (cartilage glycoprotein-…
GO:0009893	positive regulation of metabolic process	3.39e-10	3.65e-08	1.44	11488	2039	918	235	163.194	[TRIB3 - tribbles homolog 3 (drosophila), BOK - bcl2-related ovarian killer, ELL - elongation factor rna polymerase ii, NDN - necdin, melanoma antigen (mage) family member, PLAC8 - placenta-specific 8, MAP3K8 - mitogen-activated protein kinase kinase kinase 8, EBI3 - epstein-barr virus induced 3, ABCA1 - atp-binding cassette, sub-family a (abc1), member 1, TICAM1 - toll-like receptor adaptor mole…
GO:0002697	regulation of immune effector process	3.83e-10	4.06e-08	2.56	11488	244	918	50	19.5312	[MICB - mhc class i polypeptide-related sequence b, DHX58 - dexh (asp-glu-x-his) box polypeptide 58, IL12B - interleukin 12b (natural killer cell stimulatory factor 2, cytotoxic lymphocyte maturation factor 2, p40), IL23A - interleukin 23, alpha subunit p19, CD59 - cd59 molecule, complement regulatory protein, LGALS3 - lectin, galactoside-binding, soluble, 3, TRAF3IP2 - traf3 interacting protein …
GO:0060326	cell chemotaxis	3.8e-10	4.07e-08	3.33	11488	124	918	33	9.90991	[FFAR2 - free fatty acid receptor 2, CCR7 - chemokine (c-c motif) receptor 7, CCL3L3 - chemokine (c-c motif) ligand 3-like 3, CXCL9 - chemokine (c-x-c motif) ligand 9, CCR1 - chemokine (c-c motif) receptor 1, CXCL16 - chemokine (c-x-c motif) ligand 16, LGALS3 - lectin, galactoside-binding, soluble, 3, IFNG - interferon, gamma, S100A12 - s100 calcium binding protein a12, CCL19 - chemokine (c-c mot…
GO:0050790	regulation of catalytic activity	4.68e-10	4.92e-08	1.52	11488	1576	918	191	125.658	[BOK - bcl2-related ovarian killer, TRIB3 - tribbles homolog 3 (drosophila), NCF4 - neutrophil cytosolic factor 4, 40kda, ELL - elongation factor rna polymerase ii, AGAP3 - arfgap with gtpase domain, ankyrin repeat and ph domain 3, MAP3K8 - mitogen-activated protein kinase kinase kinase 8, CDC42 - cell division cycle 42, PSAP - prosaposin, DENND5A - denn/madd domain containing 5a, IL12B - interle…
GO:0071496	cellular response to external stimulus	5.33e-10	5.57e-08	2.81	11488	187	918	42	14.9466	[RALB - v-ral simian leukemia viral oncogene homolog b, ICAM1 - intercellular adhesion molecule 1, ATG7 - autophagy related 7, JUN - jun proto-oncogene, CPEB4 - cytoplasmic polyadenylation element binding protein 4, NFE2L2 - nuclear factor (erythroid-derived 2)-like 2, MAP1LC3A - microtubule-associated protein 1 light chain 3 alpha, PTGER4 - prostaglandin e receptor 4 (subtype ep4), MAP1LC3B - mi…
GO:0051246	regulation of protein metabolic process	5.68e-10	5.88e-08	1.48	11488	1738	918	206	139.189	[TRIB3 - tribbles homolog 3 (drosophila), BOK - bcl2-related ovarian killer, MAP3K8 - mitogen-activated protein kinase kinase kinase 8, EBI3 - epstein-barr virus induced 3, TICAM1 - toll-like receptor adaptor molecule 1, RELA - v-rel avian reticuloendotheliosis viral oncogene homolog a, SPINK1 - serine peptidase inhibitor, kazal type 1, NCOR2 - nuclear receptor corepressor 2, LCP2 - lymphocyte cy…
GO:0051249	regulation of lymphocyte activation	6.22e-10	6.4e-08	2.38	11488	294	918	56	23.5294	[CD83 - cd83 molecule, MAP3K8 - mitogen-activated protein kinase kinase kinase 8, CDC42 - cell division cycle 42, EBI3 - epstein-barr virus induced 3, TICAM1 - toll-like receptor adaptor molecule 1, CD274 - cd274 molecule, IL12B - interleukin 12b (natural killer cell stimulatory factor 2, cytotoxic lymphocyte maturation factor 2, p40), SDC4 - syndecan 4, IL23A - interleukin 23, alpha subunit p19,…
GO:0050867	positive regulation of cell activation	6.66e-10	6.8e-08	2.61	11488	225	918	47	18.0077	[CCR7 - chemokine (c-c motif) receptor 7, PTAFR - platelet-activating factor receptor, MAP3K8 - mitogen-activated protein kinase kinase kinase 8, CD83 - cd83 molecule, CDC42 - cell division cycle 42, EBI3 - epstein-barr virus induced 3, CD274 - cd274 molecule, TICAM1 - toll-like receptor adaptor molecule 1, IL12B - interleukin 12b (natural killer cell stimulatory factor 2, cytotoxic lymphocyte ma…
GO:0002696	positive regulation of leukocyte activation	7.17e-10	7.26e-08	2.64	11488	218	918	46	17.4242	[CCR7 - chemokine (c-c motif) receptor 7, PTAFR - platelet-activating factor receptor, MAP3K8 - mitogen-activated protein kinase kinase kinase 8, CD83 - cd83 molecule, CDC42 - cell division cycle 42, EBI3 - epstein-barr virus induced 3, TICAM1 - toll-like receptor adaptor molecule 1, CD274 - cd274 molecule, IL12B - interleukin 12b (natural killer cell stimulatory factor 2, cytotoxic lymphocyte ma…
GO:0002253	activation of immune response	7.91e-10	7.95e-08	2.29	11488	328	918	60	26.2009	[MICB - mhc class i polypeptide-related sequence b, CDC42 - cell division cycle 42, SPG21 - spastic paraplegia 21 (autosomal recessive, mast syndrome), TICAM1 - toll-like receptor adaptor molecule 1, RELA - v-rel avian reticuloendotheliosis viral oncogene homolog a, HLA-DRA - major histocompatibility complex, class ii, dr alpha, HLA-DQB1 - major histocompatibility complex, class ii, dq beta 1, LC…
GO:0001818	negative regulation of cytokine production	7.98e-10	7.96e-08	2.95	11488	161	918	38	12.8814	[TNFRSF9 - tumor necrosis factor receptor superfamily, member 9, DHX58 - dexh (asp-glu-x-his) box polypeptide 58, CD83 - cd83 molecule, PRG2 - proteoglycan 2, bone marrow (natural killer cell activator, eosinophil granule major basic protein), IL12B - interleukin 12b (natural killer cell stimulatory factor 2, cytotoxic lymphocyte maturation factor 2, p40), CD274 - cd274 molecule, ORM1 - orosomuco…
GO:0050789	regulation of biological process	8.19e-10	8.11e-08	1.16	11488	6815	918	630	543.103	[TRIB3 - tribbles homolog 3 (drosophila), ELL - elongation factor rna polymerase ii, WTAP - wilms tumor 1 associated protein, PLAC8 - placenta-specific 8, AGAP3 - arfgap with gtpase domain, ankyrin repeat and ph domain 3, MAP3K8 - mitogen-activated protein kinase kinase kinase 8, BTG3 - btg family, member 3, TMEM101 - transmembrane protein 101, SPG21 - spastic paraplegia 21 (autosomal recessive, …
GO:0043066	negative regulation of apoptotic process	8.78e-10	8.56e-08	1.93	11488	570	918	88	45.5959	[BNIP3L - bcl2/adenovirus e1b 19kda interacting protein 3-like, PLAC8 - placenta-specific 8, RELA - v-rel avian reticuloendotheliosis viral oncogene homolog a, ANXA5 - annexin a5, CTNNA1 - catenin (cadherin-associated protein), alpha 1, 102kda, IDO1 - indoleamine 2,3-dioxygenase 1, CD59 - cd59 molecule, complement regulatory protein, PTK2B - protein tyrosine kinase 2 beta, LGALS3 - lectin, galact…
GO:0043069	negative regulation of programmed cell death	8.76e-10	8.61e-08	1.92	11488	579	918	89	46.3542	[BNIP3L - bcl2/adenovirus e1b 19kda interacting protein 3-like, PLAC8 - placenta-specific 8, RELA - v-rel avian reticuloendotheliosis viral oncogene homolog a, ANXA5 - annexin a5, CTNNA1 - catenin (cadherin-associated protein), alpha 1, 102kda, CD59 - cd59 molecule, complement regulatory protein, IDO1 - indoleamine 2,3-dioxygenase 1, PTK2B - protein tyrosine kinase 2 beta, LGALS3 - lectin, galact…
GO:0051046	regulation of secretion	8.97e-10	8.69e-08	2.09	11488	438	918	73	34.9282	[TNFRSF9 - tumor necrosis factor receptor superfamily, member 9, PNKD - paroxysmal nonkinesigenic dyskinesia, ATP2A2 - atpase, ca++ transporting, cardiac muscle, slow twitch 2, NMB - neuromedin b, SOCS1 - suppressor of cytokine signaling 1, SDCBP - syndecan binding protein (syntenin), CD274 - cd274 molecule, SDC4 - syndecan 4, OSM - oncostatin m, CD58 - cd58 molecule, CASP5 - caspase 5, apoptosis…
GO:0050863	regulation of T cell activation	9.08e-10	8.72e-08	2.59	11488	227	918	47	18.1467	[CCR7 - chemokine (c-c motif) receptor 7, NFKBID - nuclear factor of kappa light polypeptide gene enhancer in b-cells inhibitor, delta, MAP3K8 - mitogen-activated protein kinase kinase kinase 8, CD83 - cd83 molecule, CDC42 - cell division cycle 42, EBI3 - epstein-barr virus induced 3, CD274 - cd274 molecule, IL12B - interleukin 12b (natural killer cell stimulatory factor 2, cytotoxic lymphocyte m…
GO:0002757	immune response-activating signal transduction	9.24e-10	8.81e-08	2.36	11488	297	918	56	23.7288	[MICB - mhc class i polypeptide-related sequence b, CDC42 - cell division cycle 42, SPG21 - spastic paraplegia 21 (autosomal recessive, mast syndrome), TICAM1 - toll-like receptor adaptor molecule 1, RELA - v-rel avian reticuloendotheliosis viral oncogene homolog a, HLA-DRA - major histocompatibility complex, class ii, dr alpha, HLA-DQB1 - major histocompatibility complex, class ii, dq beta 1, LC…
GO:0032270	positive regulation of cellular protein metabolic process	9.99e-10	9.47e-08	1.67	11488	988	918	132	79.0419	[BOK - bcl2-related ovarian killer, TRIB3 - tribbles homolog 3 (drosophila), MAP3K8 - mitogen-activated protein kinase kinase kinase 8, CDC42 - cell division cycle 42, PSAP - prosaposin, TICAM1 - toll-like receptor adaptor molecule 1, IL12B - interleukin 12b (natural killer cell stimulatory factor 2, cytotoxic lymphocyte maturation factor 2, p40), SDCBP - syndecan binding protein (syntenin), SDC4…
GO:0002819	regulation of adaptive immune response	1.09e-09	1.03e-07	3.61	11488	97	918	28	7.75623	[SAMSN1 - sam domain, sh3 domain and nuclear localization signals 1, IL12B - interleukin 12b (natural killer cell stimulatory factor 2, cytotoxic lymphocyte maturation factor 2, p40), IL23A - interleukin 23, alpha subunit p19, SLC11A1 - solute carrier family 11 (proton-coupled divalent metal ion transporter), member 1, NLRP3 - nlr family, pyrin domain containing 3, TNFSF13B - tumor necrosis facto…
GO:0050707	regulation of cytokine secretion	1.16e-09	1.08e-07	3.34	11488	116	918	31	9.28144	[TNFRSF9 - tumor necrosis factor receptor superfamily, member 9, FFAR2 - free fatty acid receptor 2, CCR7 - chemokine (c-c motif) receptor 7, CLEC4E - c-type lectin domain family 4, member e, SOCS1 - suppressor of cytokine signaling 1, CD274 - cd274 molecule, PTGER4 - prostaglandin e receptor 4 (subtype ep4), CD58 - cd58 molecule, LYN - v-yes-1 yamaguchi sarcoma viral related oncogene homolog, CD…
GO:0051239	regulation of multicellular organismal process	1.17e-09	1.08e-07	1.48	11488	1699	918	201	135.811	[DHX58 - dexh (asp-glu-x-his) box polypeptide 58, PLAC8 - placenta-specific 8, EBI3 - epstein-barr virus induced 3, ABCA1 - atp-binding cassette, sub-family a (abc1), member 1, SPP1 - secreted phosphoprotein 1, CD274 - cd274 molecule, TICAM1 - toll-like receptor adaptor molecule 1, RELA - v-rel avian reticuloendotheliosis viral oncogene homolog a, LGALS1 - lectin, galactoside-binding, soluble, 1,…
GO:0071702	organic substance transport	1.37e-09	1.26e-07	1.54	11488	1408	918	173	112.338	[ATP6V1F - atpase, h+ transporting, lysosomal 14kda, v1 subunit f, SEC13 - sec13 homolog (s. cerevisiae), SPIRE1 - spire actin nucleation factor 1, PLEKHF2 - pleckstrin homology domain containing, family f (with fyve domain) member 2, TRAK1 - trafficking protein, kinesin binding 1, PSAP - prosaposin, SEC24D - sec24 family, member d (s. cerevisiae), SEC61B - sec61 beta subunit, ABCA1 - atp-binding…
GO:0040011	locomotion	2.06e-09	1.88e-07	1.88	11488	607	918	91	48.4043	[SIRPA - signal-regulatory protein alpha, CCL3L3 - chemokine (c-c motif) ligand 3-like 3, NDN - necdin, melanoma antigen (mage) family member, CDC42 - cell division cycle 42, CXCL9 - chemokine (c-x-c motif) ligand 9, IER2 - immediate early response 2, ATP1B3 - atpase, na+/k+ transporting, beta 3 polypeptide, IL12B - interleukin 12b (natural killer cell stimulatory factor 2, cytotoxic lymphocyte m…
GO:0051179	localization	2.09e-09	1.9e-07	1.34	11488	2803	918	300	223.881	[TSPAN14 - tetraspanin 14, SPIRE1 - spire actin nucleation factor 1, TRAK1 - trafficking protein, kinesin binding 1, SLC31A2 - solute carrier family 31 (copper transporter), member 2, ABCA1 - atp-binding cassette, sub-family a (abc1), member 1, SEC61B - sec61 beta subunit, CD274 - cd274 molecule, ABCF1 - atp-binding cassette, sub-family f (gcn20), member 1, LDLR - low density lipoprotein receptor…
GO:0010243	response to organonitrogen compound	2.42e-09	2.18e-07	2.05	11488	439	918	72	35.122	[TRIB3 - tribbles homolog 3 (drosophila), ATP2A2 - atpase, ca++ transporting, cardiac muscle, slow twitch 2, SOCS1 - suppressor of cytokine signaling 1, RHOQ - ras homolog family member q, RELA - v-rel avian reticuloendotheliosis viral oncogene homolog a, CTNNA1 - catenin (cadherin-associated protein), alpha 1, 102kda, JAG1 - jagged 1, PTK2B - protein tyrosine kinase 2 beta, GCGR - glucagon recep…
GO:0006875	cellular metal ion homeostasis	2.5e-09	2.24e-07	2.43	11488	257	918	50	20.5761	[ATP2A2 - atpase, ca++ transporting, cardiac muscle, slow twitch 2, NMB - neuromedin b, SLC31A2 - solute carrier family 31 (copper transporter), member 2, ATP1B3 - atpase, na+/k+ transporting, beta 3 polypeptide, SLC11A1 - solute carrier family 11 (proton-coupled divalent metal ion transporter), member 1, ERO1L - ero1-like (s. cerevisiae), ATOX1 - antioxidant 1 copper chaperone, PTK2B - protein t…
GO:0050794	regulation of cellular process	2.85e-09	2.52e-07	1.16	11488	6513	918	604	520.69	[TRIB3 - tribbles homolog 3 (drosophila), ELL - elongation factor rna polymerase ii, WTAP - wilms tumor 1 associated protein, PLAC8 - placenta-specific 8, AGAP3 - arfgap with gtpase domain, ankyrin repeat and ph domain 3, MAP3K8 - mitogen-activated protein kinase kinase kinase 8, BTG3 - btg family, member 3, TMEM101 - transmembrane protein 101, SPG21 - spastic paraplegia 21 (autosomal recessive, …
GO:0042035	regulation of cytokine biosynthetic process	2.84e-09	2.53e-07	4.05	11488	71	918	23	5.67901	[ZFP36 - zfp36 ring finger protein, PTAFR - platelet-activating factor receptor, PRG2 - proteoglycan 2, bone marrow (natural killer cell activator, eosinophil granule major basic protein), EBI3 - epstein-barr virus induced 3, NFKB1 - nuclear factor of kappa light polypeptide gene enhancer in b-cells 1, IL1B - interleukin 1, beta, IL12B - interleukin 12b (natural killer cell stimulatory factor 2, …
GO:0051047	positive regulation of secretion	3.11e-09	2.73e-07	2.47	11488	243	918	48	19.4332	[FFAR2 - free fatty acid receptor 2, CLEC4E - c-type lectin domain family 4, member e, SERP1 - stress-associated endoplasmic reticulum protein 1, PTAFR - platelet-activating factor receptor, SNCA - synuclein, alpha (non a4 component of amyloid precursor), NMB - neuromedin b, CD274 - cd274 molecule, SDCBP - syndecan binding protein (syntenin), SDC4 - syndecan 4, TNFRSF4 - tumor necrosis factor rec…
GO:0010604	positive regulation of macromolecule metabolic process	3.25e-09	2.84e-07	1.43	11488	1924	918	220	153.846	[TRIB3 - tribbles homolog 3 (drosophila), BOK - bcl2-related ovarian killer, ELL - elongation factor rna polymerase ii, NDN - necdin, melanoma antigen (mage) family member, PLAC8 - placenta-specific 8, MAP3K8 - mitogen-activated protein kinase kinase kinase 8, EBI3 - epstein-barr virus induced 3, TICAM1 - toll-like receptor adaptor molecule 1, RELA - v-rel avian reticuloendotheliosis viral oncoge…
GO:0036498	IRE1-mediated unfolded protein response	3.29e-09	2.84e-07	4.76	11488	50	918	19	3.9916	[C19orf10 - chromosome 19 open reading frame 10, EDEM1 - er degradation enhancer, mannosidase alpha-like 1, SRPR - signal recognition particle receptor (docking protein), SERP1 - stress-associated endoplasmic reticulum protein 1, DNAJB9 - dnaj (hsp40) homolog, subfamily b, member 9, SSR1 - signal sequence receptor, alpha, SEC61B - sec61 beta subunit, ZBTB17 - zinc finger and btb domain containing…
GO:0045321	leukocyte activation	3.28e-09	2.85e-07	2.28	11488	307	918	56	24.5614	[MICB - mhc class i polypeptide-related sequence b, SBNO2 - strawberry notch homolog 2 (drosophila), EBI3 - epstein-barr virus induced 3, TICAM1 - toll-like receptor adaptor molecule 1, IL12B - interleukin 12b (natural killer cell stimulatory factor 2, cytotoxic lymphocyte maturation factor 2, p40), IL23A - interleukin 23, alpha subunit p19, SEMA4A - sema domain, immunoglobulin domain (ig), trans…
GO:0042330	taxis	3.39e-09	2.9e-07	2.59	11488	213	918	44	16.9884	[FFAR2 - free fatty acid receptor 2, CCR7 - chemokine (c-c motif) receptor 7, CCL3L3 - chemokine (c-c motif) ligand 3-like 3, PTAFR - platelet-activating factor receptor, CXCL9 - chemokine (c-x-c motif) ligand 9, CCR1 - chemokine (c-c motif) receptor 1, PLAU - plasminogen activator, urokinase, SEMA4A - sema domain, immunoglobulin domain (ig), transmembrane domain (tm) and short cytoplasmic domain…
GO:0065007	biological regulation	3.53e-09	3e-07	1.14	11488	7202	918	656	575.439	[TRIB3 - tribbles homolog 3 (drosophila), ELL - elongation factor rna polymerase ii, WTAP - wilms tumor 1 associated protein, PLAC8 - placenta-specific 8, AGAP3 - arfgap with gtpase domain, ankyrin repeat and ph domain 3, MAP3K8 - mitogen-activated protein kinase kinase kinase 8, BTG3 - btg family, member 3, TMEM101 - transmembrane protein 101, SPG21 - spastic paraplegia 21 (autosomal recessive, …
GO:0002699	positive regulation of immune effector process	3.55e-09	3e-07	3.21	11488	121	918	31	9.65732	[FFAR2 - free fatty acid receptor 2, DHX58 - dexh (asp-glu-x-his) box polypeptide 58, PTAFR - platelet-activating factor receptor, IL12B - interleukin 12b (natural killer cell stimulatory factor 2, cytotoxic lymphocyte maturation factor 2, p40), IL23A - interleukin 23, alpha subunit p19, TNFRSF4 - tumor necrosis factor receptor superfamily, member 4, LYN - v-yes-1 yamaguchi sarcoma viral related …
GO:1903530	regulation of secretion by cell	3.86e-09	3.24e-07	2.08	11488	409	918	68	32.6923	[TNFRSF9 - tumor necrosis factor receptor superfamily, member 9, PNKD - paroxysmal nonkinesigenic dyskinesia, ATP2A2 - atpase, ca++ transporting, cardiac muscle, slow twitch 2, NMB - neuromedin b, SOCS1 - suppressor of cytokine signaling 1, SDCBP - syndecan binding protein (syntenin), CD274 - cd274 molecule, SDC4 - syndecan 4, OSM - oncostatin m, CD58 - cd58 molecule, CASP5 - caspase 5, apoptosis…
GO:0016477	cell migration	4.36e-09	3.64e-07	1.97	11488	489	918	77	39.0863	[SIRPA - signal-regulatory protein alpha, CCL3L3 - chemokine (c-c motif) ligand 3-like 3, NDN - necdin, melanoma antigen (mage) family member, CDC42 - cell division cycle 42, CXCL9 - chemokine (c-x-c motif) ligand 9, ATP1B3 - atpase, na+/k+ transporting, beta 3 polypeptide, IL12B - interleukin 12b (natural killer cell stimulatory factor 2, cytotoxic lymphocyte maturation factor 2, p40), SDC4 - sy…
GO:0048870	cell motility	4.45e-09	3.66e-07	1.92	11488	534	918	82	42.7083	[SIRPA - signal-regulatory protein alpha, CCL3L3 - chemokine (c-c motif) ligand 3-like 3, NDN - necdin, melanoma antigen (mage) family member, CDC42 - cell division cycle 42, CXCL9 - chemokine (c-x-c motif) ligand 9, IER2 - immediate early response 2, ATP1B3 - atpase, na+/k+ transporting, beta 3 polypeptide, IL12B - interleukin 12b (natural killer cell stimulatory factor 2, cytotoxic lymphocyte m…
GO:0048585	negative regulation of response to stimulus	4.47e-09	3.66e-07	1.67	11488	922	918	123	73.6527	[MICB - mhc class i polypeptide-related sequence b, DHX58 - dexh (asp-glu-x-his) box polypeptide 58, CDC42 - cell division cycle 42, PSAP - prosaposin, TICAM1 - toll-like receptor adaptor molecule 1, IL12B - interleukin 12b (natural killer cell stimulatory factor 2, cytotoxic lymphocyte maturation factor 2, p40), SPP1 - secreted phosphoprotein 1, RELA - v-rel avian reticuloendotheliosis viral onc…
GO:0040012	regulation of locomotion	4.43e-09	3.67e-07	1.91	11488	543	918	83	43.4555	[CXCL9 - chemokine (c-x-c motif) ligand 9, PLA2G7 - phospholipase a2, group vii (platelet-activating factor acetylhydrolase, plasma), SDCBP - syndecan binding protein (syntenin), CD274 - cd274 molecule, SDC4 - syndecan 4, SEMA4A - sema domain, immunoglobulin domain (ig), transmembrane domain (tm) and short cytoplasmic domain, (semaphorin) 4a, IL23A - interleukin 23, alpha subunit p19, CTNNA1 - ca…
GO:0031401	positive regulation of protein modification process	4.68e-09	3.81e-07	1.74	11488	777	918	108	62.069	[TRIB3 - tribbles homolog 3 (drosophila), MAP3K8 - mitogen-activated protein kinase kinase kinase 8, CDC42 - cell division cycle 42, PSAP - prosaposin, IL12B - interleukin 12b (natural killer cell stimulatory factor 2, cytotoxic lymphocyte maturation factor 2, p40), SDCBP - syndecan binding protein (syntenin), TICAM1 - toll-like receptor adaptor molecule 1, SDC4 - syndecan 4, OSM - oncostatin m, …
GO:0010506	regulation of autophagy	4.86e-09	3.91e-07	2.53	11488	223	918	45	17.7866	[BOK - bcl2-related ovarian killer, RALB - v-ral simian leukemia viral oncogene homolog b, BNIP3L - bcl2/adenovirus e1b 19kda interacting protein 3-like, ATG7 - autophagy related 7, CTSA - cathepsin a, SNCA - synuclein, alpha (non a4 component of amyloid precursor), PSAP - prosaposin, SQSTM1 - sequestosome 1, TICAM1 - toll-like receptor adaptor molecule 1, CLN3 - ceroid-lipofuscinosis, neuronal 3…
GO:0051270	regulation of cellular component movement	4.86e-09	3.93e-07	1.92	11488	535	918	82	42.7083	[CXCL9 - chemokine (c-x-c motif) ligand 9, PLA2G7 - phospholipase a2, group vii (platelet-activating factor acetylhydrolase, plasma), SDCBP - syndecan binding protein (syntenin), CD274 - cd274 molecule, SDC4 - syndecan 4, SEMA4A - sema domain, immunoglobulin domain (ig), transmembrane domain (tm) and short cytoplasmic domain, (semaphorin) 4a, IL23A - interleukin 23, alpha subunit p19, CTNNA1 - ca…
GO:0009617	response to bacterium	5.12e-09	4.09e-07	2.87	11488	157	918	36	12.5436	[MR1 - major histocompatibility complex, class i-related, CLEC4E - c-type lectin domain family 4, member e, CLEC4D - c-type lectin domain family 4, member d, PLAC8 - placenta-specific 8, PTAFR - platelet-activating factor receptor, BAIAP2L1 - bai1-associated protein 2-like 1, PRG2 - proteoglycan 2, bone marrow (natural killer cell activator, eosinophil granule major basic protein), ADAM17 - adam …
GO:0060333	interferon-gamma-mediated signaling pathway	5.61e-09	4.45e-07	4.24	11488	62	918	21	4.95283	[ICAM1 - intercellular adhesion molecule 1, HCK - hemopoietic cell kinase, MT2A - metallothionein 2a, IRF8 - interferon regulatory factor 8, PTAFR - platelet-activating factor receptor, STAT1 - signal transducer and activator of transcription 1, 91kda, CD44 - cd44 molecule (indian blood group), GBP1 - guanylate binding protein 1, interferon-inducible, IFI30 - interferon, gamma-inducible protein 3…
GO:0002824	positive regulation of adaptive immune response based on somatic recombination of immune receptors built from immunoglobulin superfamily domains	6.44e-09	5.08e-07	4.39	11488	57	918	20	4.55581	[RSAD2 - radical s-adenosyl methionine domain containing 2, CCL19 - chemokine (c-c motif) ligand 19, P2RX7 - purinergic receptor p2x, ligand-gated ion channel, 7, ZP3 - zona pellucida glycoprotein 3 (sperm receptor), RIPK2 - receptor-interacting serine-threonine kinase 2, IL1B - interleukin 1, beta, CD40 - cd40 molecule, tnf receptor superfamily member 5, IL12B - interleukin 12b (natural killer c…
GO:0030334	regulation of cell migration	6.73e-09	5.28e-07	1.98	11488	467	918	74	37.3737	[CXCL9 - chemokine (c-x-c motif) ligand 9, PLA2G7 - phospholipase a2, group vii (platelet-activating factor acetylhydrolase, plasma), SDCBP - syndecan binding protein (syntenin), CD274 - cd274 molecule, SDC4 - syndecan 4, SEMA4A - sema domain, immunoglobulin domain (ig), transmembrane domain (tm) and short cytoplasmic domain, (semaphorin) 4a, IL23A - interleukin 23, alpha subunit p19, JAG1 - jagg…
GO:0032268	regulation of cellular protein metabolic process	6.86e-09	5.35e-07	1.47	11488	1628	918	191	129.932	[BOK - bcl2-related ovarian killer, TRIB3 - tribbles homolog 3 (drosophila), MAP3K8 - mitogen-activated protein kinase kinase kinase 8, CDC42 - cell division cycle 42, PSAP - prosaposin, TICAM1 - toll-like receptor adaptor molecule 1, IL12B - interleukin 12b (natural killer cell stimulatory factor 2, cytotoxic lymphocyte maturation factor 2, p40), SDCBP - syndecan binding protein (syntenin), SDC4…
GO:1903039	positive regulation of leukocyte cell-cell adhesion	7.14e-09	5.54e-07	2.79	11488	166	918	37	13.2616	[PTAFR - platelet-activating factor receptor, CD83 - cd83 molecule, MAP3K8 - mitogen-activated protein kinase kinase kinase 8, CDC42 - cell division cycle 42, EBI3 - epstein-barr virus induced 3, IL12B - interleukin 12b (natural killer cell stimulatory factor 2, cytotoxic lymphocyte maturation factor 2, p40), CD274 - cd274 molecule, IL23A - interleukin 23, alpha subunit p19, GRB2 - growth factor …
GO:0048523	negative regulation of cellular process	7.23e-09	5.57e-07	1.33	11488	2823	918	299	224.812	[TRIB3 - tribbles homolog 3 (drosophila), ELL - elongation factor rna polymerase ii, DHX58 - dexh (asp-glu-x-his) box polypeptide 58, BNIP3L - bcl2/adenovirus e1b 19kda interacting protein 3-like, NDN - necdin, melanoma antigen (mage) family member, PLAC8 - placenta-specific 8, CAB39L - calcium binding protein 39-like, CREG1 - cellular repressor of e1a-stimulated genes 1, BTG3 - btg family, membe…
GO:0042108	positive regulation of cytokine biosynthetic process	7.39e-09	5.67e-07	4.79	11488	47	918	18	3.75783	[PTAFR - platelet-activating factor receptor, EBI3 - epstein-barr virus induced 3, IL1B - interleukin 1, beta, IL12B - interleukin 12b (natural killer cell stimulatory factor 2, cytotoxic lymphocyte maturation factor 2, p40), TICAM1 - toll-like receptor adaptor molecule 1, IL1A - interleukin 1, alpha, RELA - v-rel avian reticuloendotheliosis viral oncogene homolog a, EGR1 - early growth response …
GO:0009991	response to extracellular stimulus	8.33e-09	6.35e-07	2.35	11488	266	918	50	21.2766	[ABCA1 - atp-binding cassette, sub-family a (abc1), member 1, SPP1 - secreted phosphoprotein 1, RELA - v-rel avian reticuloendotheliosis viral oncogene homolog a, ACSL1 - acyl-coa synthetase long-chain family member 1, MAP1LC3B - microtubule-associated protein 1 light chain 3 beta, GCGR - glucagon receptor, UPP1 - uridine phosphorylase 1, ATF3 - activating transcription factor 3, XBP1 - x-box bin…
GO:1903532	positive regulation of secretion by cell	8.67e-09	6.57e-07	2.48	11488	227	918	45	18.1452	[FFAR2 - free fatty acid receptor 2, CLEC4E - c-type lectin domain family 4, member e, SERP1 - stress-associated endoplasmic reticulum protein 1, PTAFR - platelet-activating factor receptor, SNCA - synuclein, alpha (non a4 component of amyloid precursor), NMB - neuromedin b, CD274 - cd274 molecule, SDCBP - syndecan binding protein (syntenin), SDC4 - syndecan 4, TNFRSF4 - tumor necrosis factor rec…
GO:0006935	chemotaxis	9.12e-09	6.87e-07	2.54	11488	212	918	43	16.9291	[FFAR2 - free fatty acid receptor 2, CCR7 - chemokine (c-c motif) receptor 7, CCL3L3 - chemokine (c-c motif) ligand 3-like 3, PTAFR - platelet-activating factor receptor, CXCL9 - chemokine (c-x-c motif) ligand 9, CCR1 - chemokine (c-c motif) receptor 1, PLAU - plasminogen activator, urokinase, SEMA4A - sema domain, immunoglobulin domain (ig), transmembrane domain (tm) and short cytoplasmic domain…
GO:2000145	regulation of cell motility	1.09e-08	8.17e-07	1.93	11488	499	918	77	39.8964	[CXCL9 - chemokine (c-x-c motif) ligand 9, PLA2G7 - phospholipase a2, group vii (platelet-activating factor acetylhydrolase, plasma), SDCBP - syndecan binding protein (syntenin), CD274 - cd274 molecule, SDC4 - syndecan 4, SEMA4A - sema domain, immunoglobulin domain (ig), transmembrane domain (tm) and short cytoplasmic domain, (semaphorin) 4a, IL23A - interleukin 23, alpha subunit p19, CTNNA1 - ca…
GO:0043122	regulation of I-kappaB kinase/NF-kappaB signaling	1.47e-08	1.09e-06	2.57	11488	200	918	41	15.9533	[CCR7 - chemokine (c-c motif) receptor 7, NFKBID - nuclear factor of kappa light polypeptide gene enhancer in b-cells inhibitor, delta, UBD - ubiquitin d, LITAF - lipopolysaccharide-induced tnf factor, STAT1 - signal transducer and activator of transcription 1, 91kda, SPHK1 - sphingosine kinase 1, TMEM101 - transmembrane protein 101, SQSTM1 - sequestosome 1, TICAM1 - toll-like receptor adaptor mo…
GO:0051251	positive regulation of lymphocyte activation	1.47e-08	1.09e-06	2.57	11488	200	918	41	15.9533	[CCR7 - chemokine (c-c motif) receptor 7, MAP3K8 - mitogen-activated protein kinase kinase kinase 8, CD83 - cd83 molecule, CDC42 - cell division cycle 42, EBI3 - epstein-barr virus induced 3, TICAM1 - toll-like receptor adaptor molecule 1, CD274 - cd274 molecule, IL12B - interleukin 12b (natural killer cell stimulatory factor 2, cytotoxic lymphocyte maturation factor 2, p40), IL23A - interleukin …
GO:0009725	response to hormone	1.65e-08	1.22e-06	2.07	11488	380	918	63	30.4348	[TRIB3 - tribbles homolog 3 (drosophila), ATP2A2 - atpase, ca++ transporting, cardiac muscle, slow twitch 2, RHOQ - ras homolog family member q, SPP1 - secreted phosphoprotein 1, RELA - v-rel avian reticuloendotheliosis viral oncogene homolog a, PTK2B - protein tyrosine kinase 2 beta, RDX - radixin, GCGR - glucagon receptor, EPM2AIP1 - epm2a (laforin) interacting protein 1, INSIG2 - insulin induc…
GO:0006984	ER-nucleus signaling pathway	1.7e-08	1.24e-06	5.84	11488	30	918	14	2.39726	[INSIG1 - insulin induced gene 1, ATP2A2 - atpase, ca++ transporting, cardiac muscle, slow twitch 2, CCL2 - chemokine (c-c motif) ligand 2, NFE2L2 - nuclear factor (erythroid-derived 2)-like 2, CALR - calreticulin, HSP90B1 - heat shock protein 90kda beta (grp94), member 1, IL8 - interleukin 8, INSIG2 - insulin induced gene 2, HSPA5 - heat shock 70kda protein 5 (glucose-regulated protein, 78kda), …
GO:0046903	secretion	1.77e-08	1.28e-06	2.12	11488	355	918	60	28.3019	[CANX - calnexin, PSAP - prosaposin, USF2 - upstream transcription factor 2, c-fos interacting, NMB - neuromedin b, ABCA1 - atp-binding cassette, sub-family a (abc1), member 1, ORM1 - orosomucoid 1, ORM2 - orosomucoid 2, LCP2 - lymphocyte cytosolic protein 2 (sh2 domain containing leukocyte protein of 76kda), PPFIA1 - protein tyrosine phosphatase, receptor type, f polypeptide (ptprf), interacting…
GO:0002821	positive regulation of adaptive immune response	1.77e-08	1.29e-06	4.17	11488	60	918	20	4.79616	[RSAD2 - radical s-adenosyl methionine domain containing 2, CCL19 - chemokine (c-c motif) ligand 19, P2RX7 - purinergic receptor p2x, ligand-gated ion channel, 7, ZP3 - zona pellucida glycoprotein 3 (sperm receptor), RIPK2 - receptor-interacting serine-threonine kinase 2, CD40 - cd40 molecule, tnf receptor superfamily member 5, IL1B - interleukin 1, beta, IL12B - interleukin 12b (natural killer c…
GO:0097190	apoptotic signaling pathway	1.8e-08	1.3e-06	2.51	11488	209	918	42	16.7331	[TRIB3 - tribbles homolog 3 (drosophila), BOK - bcl2-related ovarian killer, TNFRSF9 - tumor necrosis factor receptor superfamily, member 9, DDIT4 - dna-damage-inducible transcript 4, ZNF622 - zinc finger protein 622, G0S2 - g0/g1switch 2, TICAM1 - toll-like receptor adaptor molecule 1, ACVR1B - activin a receptor, type ib, TNFRSF4 - tumor necrosis factor receptor superfamily, member 4, IKBKE - i…
GO:0022409	positive regulation of cell-cell adhesion	2.16e-08	1.55e-06	2.64	11488	180	918	38	14.3939	[FLOT1 - flotillin 1, PTAFR - platelet-activating factor receptor, MAP3K8 - mitogen-activated protein kinase kinase kinase 8, CD83 - cd83 molecule, CDC42 - cell division cycle 42, EBI3 - epstein-barr virus induced 3, CD274 - cd274 molecule, IL12B - interleukin 12b (natural killer cell stimulatory factor 2, cytotoxic lymphocyte maturation factor 2, p40), IL23A - interleukin 23, alpha subunit p19, …
GO:0045089	positive regulation of innate immune response	2.3e-08	1.64e-06	2.53	11488	203	918	41	16.2055	[FFAR2 - free fatty acid receptor 2, CLEC4D - c-type lectin domain family 4, member d, CLEC4E - c-type lectin domain family 4, member e, PSME2 - proteasome (prosome, macropain) activator subunit 2 (pa28 beta), TICAM1 - toll-like receptor adaptor molecule 1, IL12B - interleukin 12b (natural killer cell stimulatory factor 2, cytotoxic lymphocyte maturation factor 2, p40), RELA - v-rel avian reticul…
GO:0002521	leukocyte differentiation	2.66e-08	1.88e-06	2.52	11488	204	918	41	16.2698	[CCR7 - chemokine (c-c motif) receptor 7, CLEC4D - c-type lectin domain family 4, member d, CLEC4E - c-type lectin domain family 4, member e, BATF - basic leucine zipper transcription factor, atf-like, UBD - ubiquitin d, JUN - jun proto-oncogene, CDC42 - cell division cycle 42, JUNB - jun b proto-oncogene, ADAM17 - adam metallopeptidase domain 17, IL12B - interleukin 12b (natural killer cell stim…
GO:0051452	intracellular pH reduction	2.87e-08	2.01e-06	5.65	11488	31	918	14	2.47788	[ATP6V1E1 - atpase, h+ transporting, lysosomal 31kda, v1 subunit e1, ATP6V1G1 - atpase, h+ transporting, lysosomal 13kda, v1 subunit g1, ATP6V1F - atpase, h+ transporting, lysosomal 14kda, v1 subunit f, RAB7A - rab7a, member ras oncogene family, ATP6V1A - atpase, h+ transporting, lysosomal 70kda, v1 subunit a, ATP6V1B2 - atpase, h+ transporting, lysosomal 56/58kda, v1 subunit b2, RAB20 - rab20, m…
GO:0045851	pH reduction	2.87e-08	2.02e-06	5.65	11488	31	918	14	2.47788	[ATP6V1G1 - atpase, h+ transporting, lysosomal 13kda, v1 subunit g1, ATP6V1E1 - atpase, h+ transporting, lysosomal 31kda, v1 subunit e1, ATP6V1F - atpase, h+ transporting, lysosomal 14kda, v1 subunit f, RAB7A - rab7a, member ras oncogene family, ATP6V1A - atpase, h+ transporting, lysosomal 70kda, v1 subunit a, ATP6V1B2 - atpase, h+ transporting, lysosomal 56/58kda, v1 subunit b2, RAB20 - rab20, m…
GO:0045184	establishment of protein localization	2.94e-08	2.06e-06	1.59	11488	1042	918	132	83.0189	[ATP6V1F - atpase, h+ transporting, lysosomal 14kda, v1 subunit f, TSPAN14 - tetraspanin 14, SEC13 - sec13 homolog (s. cerevisiae), SPIRE1 - spire actin nucleation factor 1, PLEKHF2 - pleckstrin homology domain containing, family f (with fyve domain) member 2, TRAK1 - trafficking protein, kinesin binding 1, SEC24D - sec24 family, member d (s. cerevisiae), ABCA1 - atp-binding cassette, sub-family …
GO:0044710	single-organism metabolic process	3.2e-08	2.22e-06	1.37	11488	2207	918	241	175.912	[NCF2 - neutrophil cytosolic factor 2, NCF4 - neutrophil cytosolic factor 4, 40kda, GBA3 - glucosidase, beta, acid 3, HSD17B4 - hydroxysteroid (17-beta) dehydrogenase 4, MAP3K8 - mitogen-activated protein kinase kinase kinase 8, CREG1 - cellular repressor of e1a-stimulated genes 1, TRAK1 - trafficking protein, kinesin binding 1, BCKDK - branched chain ketoacid dehydrogenase kinase, ABCA1 - atp-bi…
GO:0002675	positive regulation of acute inflammatory response	3.33e-08	2.3e-06	7.25	11488	19	918	11	1.51724	[C3 - complement component 3, TNF - tumor necrosis factor, OSM - oncostatin m, FFAR2 - free fatty acid receptor 2, CCR7 - chemokine (c-c motif) receptor 7, FCER1G - fc fragment of ige, high affinity i, receptor for; gamma polypeptide, ZP3 - zona pellucida glycoprotein 3 (sperm receptor), F12 - coagulation factor xii (hageman factor), PTGS2 - prostaglandin-endoperoxide synthase 2 (prostaglandin g/…
GO:0045785	positive regulation of cell adhesion	3.36e-08	2.31e-06	2.28	11488	269	918	49	21.4912	[CD83 - cd83 molecule, MAP3K8 - mitogen-activated protein kinase kinase kinase 8, CDC42 - cell division cycle 42, EBI3 - epstein-barr virus induced 3, IL12B - interleukin 12b (natural killer cell stimulatory factor 2, cytotoxic lymphocyte maturation factor 2, p40), CD274 - cd274 molecule, SDC4 - syndecan 4, IL23A - interleukin 23, alpha subunit p19, HLA-DRA - major histocompatibility complex, cla…
GO:0007568	aging	3.58e-08	2.45e-06	2.72	11488	161	918	35	12.8676	[LONP1 - lon peptidase 1, mitochondrial, ICAM1 - intercellular adhesion molecule 1, SERP1 - stress-associated endoplasmic reticulum protein 1, JUN - jun proto-oncogene, LITAF - lipopolysaccharide-induced tnf factor, SNCA - synuclein, alpha (non a4 component of amyloid precursor), CANX - calnexin, STAT3 - signal transducer and activator of transcription 3 (acute-phase response factor), RELA - v-re…
GO:0031399	regulation of protein modification process	3.67e-08	2.5e-06	1.55	11488	1158	918	143	92.2581	[TRIB3 - tribbles homolog 3 (drosophila), MAP3K8 - mitogen-activated protein kinase kinase kinase 8, CDC42 - cell division cycle 42, PSAP - prosaposin, TICAM1 - toll-like receptor adaptor molecule 1, IL12B - interleukin 12b (natural killer cell stimulatory factor 2, cytotoxic lymphocyte maturation factor 2, p40), SDCBP - syndecan binding protein (syntenin), SDC4 - syndecan 4, SPINK1 - serine pept…
GO:0002250	adaptive immune response	3.87e-08	2.62e-06	2.81	11488	147	918	33	11.7438	[MICB - mhc class i polypeptide-related sequence b, LILRA3 - leukocyte immunoglobulin-like receptor, subfamily a (without tm domain), member 3, CLEC4D - c-type lectin domain family 4, member d, EMR1 - egf-like module containing, mucin-like, hormone receptor-like 1, EBI3 - epstein-barr virus induced 3, ADAM17 - adam metallopeptidase domain 17, IL12B - interleukin 12b (natural killer cell stimulato…
GO:0002683	negative regulation of immune system process	4.19e-08	2.82e-06	2.24	11488	279	918	50	22.3214	[MICB - mhc class i polypeptide-related sequence b, DHX58 - dexh (asp-glu-x-his) box polypeptide 58, IL12B - interleukin 12b (natural killer cell stimulatory factor 2, cytotoxic lymphocyte maturation factor 2, p40), TICAM1 - toll-like receptor adaptor molecule 1, CD274 - cd274 molecule, SDC4 - syndecan 4, IDO1 - indoleamine 2,3-dioxygenase 1, CD59 - cd59 molecule, complement regulatory protein, P…
GO:0044765	single-organism transport	4.32e-08	2.9e-06	1.52	11488	1254	918	152	100	[ATP6V1F - atpase, h+ transporting, lysosomal 14kda, v1 subunit f, TMEM38B - transmembrane protein 38b, CDC42 - cell division cycle 42, PSAP - prosaposin, ABCA1 - atp-binding cassette, sub-family a (abc1), member 1, ORM1 - orosomucoid 1, SDCBP - syndecan binding protein (syntenin), ORM2 - orosomucoid 2, OSBP - oxysterol binding protein, TMED2 - transmembrane emp24 domain trafficking protein 2, LD…
GO:0002822	regulation of adaptive immune response based on somatic recombination of immune receptors built from immunoglobulin superfamily domains	4.47e-08	2.95e-06	3.45	11488	87	918	24	6.95652	[RSAD2 - radical s-adenosyl methionine domain containing 2, CCL19 - chemokine (c-c motif) ligand 19, CEACAM1 - carcinoembryonic antigen-related cell adhesion molecule 1 (biliary glycoprotein), P2RX7 - purinergic receptor p2x, ligand-gated ion channel, 7, ZP3 - zona pellucida glycoprotein 3 (sperm receptor), RIPK2 - receptor-interacting serine-threonine kinase 2, CD40 - cd40 molecule, tnf receptor…
GO:0031667	response to nutrient levels	4.44e-08	2.96e-06	2.33	11488	247	918	46	19.7425	[RALB - v-ral simian leukemia viral oncogene homolog b, ICAM1 - intercellular adhesion molecule 1, ATG7 - autophagy related 7, JUN - jun proto-oncogene, STAT1 - signal transducer and activator of transcription 1, 91kda, ABCA1 - atp-binding cassette, sub-family a (abc1), member 1, SPP1 - secreted phosphoprotein 1, CPEB4 - cytoplasmic polyadenylation element binding protein 4, RELA - v-rel avian re…
GO:1903555	regulation of tumor necrosis factor superfamily cytokine production	4.47e-08	2.96e-06	3.45	11488	87	918	24	6.95652	[ZC3H12A - zinc finger ccch-type containing 12a, CCL19 - chemokine (c-c motif) ligand 19, ZFP36 - zfp36 ring finger protein, PTAFR - platelet-activating factor receptor, RIPK2 - receptor-interacting serine-threonine kinase 2, CCL2 - chemokine (c-c motif) ligand 2, CD274 - cd274 molecule, ORM1 - orosomucoid 1, IL12B - interleukin 12b (natural killer cell stimulatory factor 2, cytotoxic lymphocyte …
GO:0051241	negative regulation of multicellular organismal process	4.53e-08	2.97e-06	1.78	11488	627	918	89	50	[TNFRSF9 - tumor necrosis factor receptor superfamily, member 9, DHX58 - dexh (asp-glu-x-his) box polypeptide 58, PLAC8 - placenta-specific 8, ATP2A2 - atpase, ca++ transporting, cardiac muscle, slow twitch 2, F12 - coagulation factor xii (hageman factor), CD83 - cd83 molecule, PRG2 - proteoglycan 2, bone marrow (natural killer cell activator, eosinophil granule major basic protein), ORM1 - oroso…
GO:0050715	positive regulation of cytokine secretion	4.72e-08	3.08e-06	3.55	11488	81	918	23	6.47887	[FFAR2 - free fatty acid receptor 2, CCL19 - chemokine (c-c motif) ligand 19, P2RX7 - purinergic receptor p2x, ligand-gated ion channel, 7, CLEC4E - c-type lectin domain family 4, member e, TNFRSF14 - tumor necrosis factor receptor superfamily, member 14, IL1B - interleukin 1, beta, CD274 - cd274 molecule, IL1A - interleukin 1, alpha, HAVCR2 - hepatitis a virus cellular receptor 2, CCL3 - chemoki…
GO:0055065	metal ion homeostasis	4.97e-08	3.22e-06	2.19	11488	297	918	52	23.7443	[ATP2A2 - atpase, ca++ transporting, cardiac muscle, slow twitch 2, NMB - neuromedin b, SLC31A2 - solute carrier family 31 (copper transporter), member 2, ATP1B3 - atpase, na+/k+ transporting, beta 3 polypeptide, SLC11A1 - solute carrier family 11 (proton-coupled divalent metal ion transporter), member 1, ERO1L - ero1-like (s. cerevisiae), ATOX1 - antioxidant 1 copper chaperone, PTK2B - protein t…
GO:0002758	innate immune response-activating signal transduction	4.97e-08	3.23e-06	2.69	11488	163	918	35	13.0112	[FFAR2 - free fatty acid receptor 2, CLEC4E - c-type lectin domain family 4, member e, CLEC4D - c-type lectin domain family 4, member d, PSME2 - proteasome (prosome, macropain) activator subunit 2 (pa28 beta), TICAM1 - toll-like receptor adaptor molecule 1, RELA - v-rel avian reticuloendotheliosis viral oncogene homolog a, IKBKE - inhibitor of kappa light polypeptide gene enhancer in b-cells, kin…
GO:0002443	leukocyte mediated immunity	5.54e-08	3.57e-06	4.1	11488	58	918	19	4.63415	[MICB - mhc class i polypeptide-related sequence b, CTSH - cathepsin h, ZP3 - zona pellucida glycoprotein 3 (sperm receptor), SERPINB9 - serpin peptidase inhibitor, clade b (ovalbumin), member 9, SLAMF7 - slam family member 7, ADAM17 - adam metallopeptidase domain 17, TREM1 - triggering receptor expressed on myeloid cells 1, MYO1G - myosin ig, SLC11A1 - solute carrier family 11 (proton-coupled di…
GO:0071495	cellular response to endogenous stimulus	5.6e-08	3.58e-06	2	11488	401	918	64	32	[TRIB3 - tribbles homolog 3 (drosophila), SOCS1 - suppressor of cytokine signaling 1, RHOQ - ras homolog family member q, RELA - v-rel avian reticuloendotheliosis viral oncogene homolog a, CTNNA1 - catenin (cadherin-associated protein), alpha 1, 102kda, RDX - radixin, GCGR - glucagon receptor, XBP1 - x-box binding protein 1, PID1 - phosphotyrosine interaction domain containing 1, CTSL - cathepsin…
GO:2000379	positive regulation of reactive oxygen species metabolic process	6.09e-08	3.88e-06	3.91	11488	64	918	20	5.11509	[P2RX4 - purinergic receptor p2x, ligand-gated ion channel, 4, ZC3H12A - zinc finger ccch-type containing 12a, ICAM1 - intercellular adhesion molecule 1, SNCA - synuclein, alpha (non a4 component of amyloid precursor), CDKN1A - cyclin-dependent kinase inhibitor 1a (p21, cip1), ASS1 - argininosuccinate synthase 1, IL1B - interleukin 1, beta, TICAM1 - toll-like receptor adaptor molecule 1, NFE2L2 -…
GO:0008219	cell death	6.4e-08	4.06e-06	1.84	11488	538	918	79	42.9348	[BOK - bcl2-related ovarian killer, TNFRSF9 - tumor necrosis factor receptor superfamily, member 9, MAP3K8 - mitogen-activated protein kinase kinase kinase 8, UBE2Z - ubiquitin-conjugating enzyme e2z, TICAM1 - toll-like receptor adaptor molecule 1, CLIC4 - chloride intracellular channel 4, PTK2B - protein tyrosine kinase 2 beta, SEMA6A - sema domain, transmembrane domain (tm), and cytoplasmic dom…
GO:0006953	acute-phase response	6.86e-08	4.33e-06	6.88	11488	20	918	11	1.59884	[ORM2 - orosomucoid 2, HAMP - hepcidin antimicrobial peptide, STAT3 - signal transducer and activator of transcription 3 (acute-phase response factor), CEBPB - ccaat/enhancer binding protein (c/ebp), beta, ASS1 - argininosuccinate synthase 1, IL1B - interleukin 1, beta, IL6 - interleukin 6 (interferon, beta 2), PLSCR1 - phospholipid scramblase 1, ORM1 - orosomucoid 1, IL1A - interleukin 1, alpha,…
GO:0015031	protein transport	7.07e-08	4.44e-06	1.6	11488	956	918	122	76.25	[ATP6V1F - atpase, h+ transporting, lysosomal 14kda, v1 subunit f, SEC13 - sec13 homolog (s. cerevisiae), PLEKHF2 - pleckstrin homology domain containing, family f (with fyve domain) member 2, SPIRE1 - spire actin nucleation factor 1, TRAK1 - trafficking protein, kinesin binding 1, SEC24D - sec24 family, member d (s. cerevisiae), ABCA1 - atp-binding cassette, sub-family a (abc1), member 1, SEC61B…
GO:0002673	regulation of acute inflammatory response	7.55e-08	4.72e-06	4.43	11488	48	918	17	3.83747	[FFAR2 - free fatty acid receptor 2, CCR7 - chemokine (c-c motif) receptor 7, ZP3 - zona pellucida glycoprotein 3 (sperm receptor), F12 - coagulation factor xii (hageman factor), CFB - complement factor b, SERPING1 - serpin peptidase inhibitor, clade g (c1 inhibitor), member 1, IL1B - interleukin 1, beta, C3AR1 - complement component 3a receptor 1, C3 - complement component 3, TNF - tumor necrosi…
GO:0008284	positive regulation of cell proliferation	7.67e-08	4.77e-06	1.84	11488	531	918	78	42.3913	[PLAC8 - placenta-specific 8, CDC42 - cell division cycle 42, NMB - neuromedin b, EBI3 - epstein-barr virus induced 3, IL12B - interleukin 12b (natural killer cell stimulatory factor 2, cytotoxic lymphocyte maturation factor 2, p40), SDCBP - syndecan binding protein (syntenin), TICAM1 - toll-like receptor adaptor molecule 1, CD274 - cd274 molecule, IL23A - interleukin 23, alpha subunit p19, RELA …
GO:0050870	positive regulation of T cell activation	8.58e-08	5.32e-06	2.68	11488	159	918	34	12.6866	[CD83 - cd83 molecule, MAP3K8 - mitogen-activated protein kinase kinase kinase 8, CDC42 - cell division cycle 42, EBI3 - epstein-barr virus induced 3, CD274 - cd274 molecule, IL12B - interleukin 12b (natural killer cell stimulatory factor 2, cytotoxic lymphocyte maturation factor 2, p40), IL23A - interleukin 23, alpha subunit p19, GRB2 - growth factor receptor-bound protein 2, HLA-DRA - major his…
GO:0032680	regulation of tumor necrosis factor production	9.91e-08	6.11e-06	3.43	11488	84	918	23	6.70554	[ZC3H12A - zinc finger ccch-type containing 12a, CCL19 - chemokine (c-c motif) ligand 19, ZFP36 - zfp36 ring finger protein, PTAFR - platelet-activating factor receptor, RIPK2 - receptor-interacting serine-threonine kinase 2, CCL2 - chemokine (c-c motif) ligand 2, ORM1 - orosomucoid 1, IL12B - interleukin 12b (natural killer cell stimulatory factor 2, cytotoxic lymphocyte maturation factor 2, p40…
GO:1990266	neutrophil migration	1.07e-07	6.57e-06	4.34	11488	49	918	17	3.91705	[S100A12 - s100 calcium binding protein a12, CCL3L3 - chemokine (c-c motif) ligand 3-like 3, CCL8 - chemokine (c-c motif) ligand 8, CCL2 - chemokine (c-c motif) ligand 2, TREM1 - triggering receptor expressed on myeloid cells 1, IL1B - interleukin 1, beta, CCL3 - chemokine (c-c motif) ligand 3, FCER1G - fc fragment of ige, high affinity i, receptor for; gamma polypeptide, VAV1 - vav 1 guanine nuc…
GO:0002705	positive regulation of leukocyte mediated immunity	1.08e-07	6.61e-06	3.79	11488	66	918	20	5.27704	[RSAD2 - radical s-adenosyl methionine domain containing 2, LAMP1 - lysosomal-associated membrane protein 1, STX4 - syntaxin 4, P2RX7 - purinergic receptor p2x, ligand-gated ion channel, 7, ZP3 - zona pellucida glycoprotein 3 (sperm receptor), PTAFR - platelet-activating factor receptor, CD40 - cd40 molecule, tnf receptor superfamily member 5, IL1B - interleukin 1, beta, IL12B - interleukin 12b (…
GO:0043410	positive regulation of MAPK cascade	1.09e-07	6.64e-06	2.11	11488	321	918	54	25.5924	[CCL3L3 - chemokine (c-c motif) ligand 3-like 3, MAP3K8 - mitogen-activated protein kinase kinase kinase 8, CDC42 - cell division cycle 42, PSAP - prosaposin, SDCBP - syndecan binding protein (syntenin), OSM - oncostatin m, PTK2B - protein tyrosine kinase 2 beta, MAP3K11 - mitogen-activated protein kinase kinase kinase 11, CHI3L1 - chitinase 3-like 1 (cartilage glycoprotein-39), GPNMB - glycoprot…
GO:1902578	single-organism localization	1.17e-07	7.05e-06	1.47	11488	1389	918	163	110.884	[ATP6V1F - atpase, h+ transporting, lysosomal 14kda, v1 subunit f, TMEM38B - transmembrane protein 38b, SPIRE1 - spire actin nucleation factor 1, CDC42 - cell division cycle 42, PSAP - prosaposin, ABCA1 - atp-binding cassette, sub-family a (abc1), member 1, ORM1 - orosomucoid 1, SDCBP - syndecan binding protein (syntenin), ORM2 - orosomucoid 2, OSBP - oxysterol binding protein, TMED2 - transmembr…
GO:0042742	defense response to bacterium	1.17e-07	7.07e-06	2.79	11488	139	918	31	11.1111	[MR1 - major histocompatibility complex, class i-related, CLEC4E - c-type lectin domain family 4, member e, CLEC4D - c-type lectin domain family 4, member d, PLAC8 - placenta-specific 8, PRG2 - proteoglycan 2, bone marrow (natural killer cell activator, eosinophil granule major basic protein), ADAM17 - adam metallopeptidase domain 17, IL12B - interleukin 12b (natural killer cell stimulatory facto…
GO:0010035	response to inorganic substance	1.35e-07	8.1e-06	2.13	11488	306	918	52	24.4131	[RELA - v-rel avian reticuloendotheliosis viral oncogene homolog a, AHCYL1 - adenosylhomocysteinase-like 1, PTK2B - protein tyrosine kinase 2 beta, CLIC4 - chloride intracellular channel 4, SLC25A13 - solute carrier family 25 (aspartate/glutamate carrier), member 13, MTF1 - metal-regulatory transcription factor 1, ID2 - inhibitor of dna binding 2, dominant negative helix-loop-helix protein, ZC3H1…
GO:0000041	transition metal ion transport	1.41e-07	8.4e-06	3.6	11488	73	918	21	5.83333	[ATP6V1G1 - atpase, h+ transporting, lysosomal 13kda, v1 subunit g1, ATP6V1E1 - atpase, h+ transporting, lysosomal 31kda, v1 subunit e1, ATP6V1F - atpase, h+ transporting, lysosomal 14kda, v1 subunit f, MCOLN1 - mucolipin 1, ZP3 - zona pellucida glycoprotein 3 (sperm receptor), COX17 - cox17 cytochrome c oxidase copper chaperone, ATP6V1A - atpase, h+ transporting, lysosomal 70kda, v1 subunit a, S…
GO:0030004	cellular monovalent inorganic cation homeostasis	1.41e-07	8.44e-06	3.6	11488	73	918	21	5.83333	[ATP6V1G1 - atpase, h+ transporting, lysosomal 13kda, v1 subunit g1, ATP6V1E1 - atpase, h+ transporting, lysosomal 31kda, v1 subunit e1, ATP6V1F - atpase, h+ transporting, lysosomal 14kda, v1 subunit f, RAB7A - rab7a, member ras oncogene family, KCNJ2 - potassium inwardly-rectifying channel, subfamily j, member 2, ATP6V1A - atpase, h+ transporting, lysosomal 70kda, v1 subunit a, ATP6V1D - atpase,…
GO:0070098	chemokine-mediated signaling pathway	1.5e-07	8.89e-06	4.25	11488	50	918	17	4	[CCL19 - chemokine (c-c motif) ligand 19, CCL3L3 - chemokine (c-c motif) ligand 3-like 3, CCR7 - chemokine (c-c motif) receptor 7, CCL8 - chemokine (c-c motif) ligand 8, CXCL10 - chemokine (c-x-c motif) ligand 10, CXCL9 - chemokine (c-x-c motif) ligand 9, CCL2 - chemokine (c-c motif) ligand 2, CCR1 - chemokine (c-c motif) receptor 1, CCL3 - chemokine (c-c motif) ligand 3, CXCL2 - chemokine (c-x-c…
GO:0030593	neutrophil chemotaxis	1.72e-07	1.01e-05	4.45	11488	45	918	16	3.59551	[S100A12 - s100 calcium binding protein a12, CCL3L3 - chemokine (c-c motif) ligand 3-like 3, CCL8 - chemokine (c-c motif) ligand 8, CCL2 - chemokine (c-c motif) ligand 2, TREM1 - triggering receptor expressed on myeloid cells 1, IL1B - interleukin 1, beta, CCL3 - chemokine (c-c motif) ligand 3, VAV1 - vav 1 guanine nucleotide exchange factor, FCER1G - fc fragment of ige, high affinity i, receptor…
GO:0002218	activation of innate immune response	1.74e-07	1.02e-05	2.56	11488	171	918	35	13.6719	[FFAR2 - free fatty acid receptor 2, CLEC4D - c-type lectin domain family 4, member d, CLEC4E - c-type lectin domain family 4, member e, PSME2 - proteasome (prosome, macropain) activator subunit 2 (pa28 beta), TICAM1 - toll-like receptor adaptor molecule 1, RELA - v-rel avian reticuloendotheliosis viral oncogene homolog a, IKBKE - inhibitor of kappa light polypeptide gene enhancer in b-cells, kin…
GO:0070663	regulation of leukocyte proliferation	1.85e-07	1.08e-05	2.69	11488	149	918	32	11.8959	[EBI3 - epstein-barr virus induced 3, TICAM1 - toll-like receptor adaptor molecule 1, IL12B - interleukin 12b (natural killer cell stimulatory factor 2, cytotoxic lymphocyte maturation factor 2, p40), CD274 - cd274 molecule, SDC4 - syndecan 4, IL23A - interleukin 23, alpha subunit p19, TNFRSF4 - tumor necrosis factor receptor superfamily, member 4, LYN - v-yes-1 yamaguchi sarcoma viral related on…
GO:0044093	positive regulation of molecular function	2.04e-07	1.18e-05	1.49	11488	1253	918	149	100	[BOK - bcl2-related ovarian killer, TRIB3 - tribbles homolog 3 (drosophila), NCF4 - neutrophil cytosolic factor 4, 40kda, AGAP3 - arfgap with gtpase domain, ankyrin repeat and ph domain 3, MAP3K8 - mitogen-activated protein kinase kinase kinase 8, CDC42 - cell division cycle 42, PSAP - prosaposin, DENND5A - denn/madd domain containing 5a, TICAM1 - toll-like receptor adaptor molecule 1, RIN2 - ras…
GO:0043068	positive regulation of programmed cell death	2.04e-07	1.19e-05	1.91	11488	433	918	66	34.555	[BOK - bcl2-related ovarian killer, BNIP3L - bcl2/adenovirus e1b 19kda interacting protein 3-like, CDC42 - cell division cycle 42, CD274 - cd274 molecule, IL12B - interleukin 12b (natural killer cell stimulatory factor 2, cytotoxic lymphocyte maturation factor 2, p40), OSM - oncostatin m, CTNNA1 - catenin (cadherin-associated protein), alpha 1, 102kda, IDO1 - indoleamine 2,3-dioxygenase 1, ATF6 -…
GO:0032652	regulation of interleukin-1 production	2.09e-07	1.2e-05	4.17	11488	51	918	17	4.07674	[ZC3H12A - zinc finger ccch-type containing 12a, CCL19 - chemokine (c-c motif) ligand 19, P2RX7 - purinergic receptor p2x, ligand-gated ion channel, 7, CEACAM1 - carcinoembryonic antigen-related cell adhesion molecule 1 (biliary glycoprotein), CCR7 - chemokine (c-c motif) receptor 7, SPHK1 - sphingosine kinase 1, HAVCR2 - hepatitis a virus cellular receptor 2, CCL3 - chemokine (c-c motif) ligand …
GO:0032675	regulation of interleukin-6 production	2.19e-07	1.26e-05	3.4	11488	81	918	22	6.47059	[ZC3H12A - zinc finger ccch-type containing 12a, GBA - glucosidase, beta, acid, P2RX7 - purinergic receptor p2x, ligand-gated ion channel, 7, PTAFR - platelet-activating factor receptor, RIPK2 - receptor-interacting serine-threonine kinase 2, IL1B - interleukin 1, beta, ORM1 - orosomucoid 1, TICAM1 - toll-like receptor adaptor molecule 1, IL1A - interleukin 1, alpha, HAVCR2 - hepatitis a virus ce…
GO:0002690	positive regulation of leukocyte chemotaxis	2.44e-07	1.4e-05	3.77	11488	63	918	19	5.03979	[CCL19 - chemokine (c-c motif) ligand 19, CCR7 - chemokine (c-c motif) receptor 7, CXCL10 - chemokine (c-x-c motif) ligand 10, CXCL9 - chemokine (c-x-c motif) ligand 9, CCL2 - chemokine (c-c motif) ligand 2, ADAM17 - adam metallopeptidase domain 17, PLA2G7 - phospholipase a2, group vii (platelet-activating factor acetylhydrolase, plasma), CCR1 - chemokine (c-c motif) receptor 1, CCL3 - chemokine …
GO:0010648	negative regulation of cell communication	2.62e-07	1.49e-05	1.64	11488	788	918	103	62.8049	[DHX58 - dexh (asp-glu-x-his) box polypeptide 58, PNKD - paroxysmal nonkinesigenic dyskinesia, CDC42 - cell division cycle 42, TICAM1 - toll-like receptor adaptor molecule 1, RELA - v-rel avian reticuloendotheliosis viral oncogene homolog a, SPINK1 - serine peptidase inhibitor, kazal type 1, OSM - oncostatin m, LGALS3 - lectin, galactoside-binding, soluble, 3, DACT3 - dishevelled-binding antagoni…
GO:0032655	regulation of interleukin-12 production	2.71e-07	1.53e-05	4.58	11488	41	918	15	3.27511	[TNFRSF9 - tumor necrosis factor receptor superfamily, member 9, CCL19 - chemokine (c-c motif) ligand 19, CCR7 - chemokine (c-c motif) receptor 7, IRF8 - interferon regulatory factor 8, RIPK2 - receptor-interacting serine-threonine kinase 2, NFKB1 - nuclear factor of kappa light polypeptide gene enhancer in b-cells 1, CD40 - cd40 molecule, tnf receptor superfamily member 5, IL12B - interleukin 12…
GO:0012501	programmed cell death	2.77e-07	1.56e-05	1.82	11488	510	918	74	40.6593	[BOK - bcl2-related ovarian killer, TNFRSF9 - tumor necrosis factor receptor superfamily, member 9, MAP3K8 - mitogen-activated protein kinase kinase kinase 8, UBE2Z - ubiquitin-conjugating enzyme e2z, TICAM1 - toll-like receptor adaptor molecule 1, CLIC4 - chloride intracellular channel 4, PTK2B - protein tyrosine kinase 2 beta, SEMA6A - sema domain, transmembrane domain (tm), and cytoplasmic dom…
GO:0042345	regulation of NF-kappaB import into nucleus	2.81e-07	1.58e-05	4.87	11488	36	918	14	2.87474	[ZC3H12A - zinc finger ccch-type containing 12a, CCL19 - chemokine (c-c motif) ligand 19, LITAF - lipopolysaccharide-induced tnf factor, NFKBIA - nuclear factor of kappa light polypeptide gene enhancer in b-cells inhibitor, alpha, SPHK1 - sphingosine kinase 1, IL1B - interleukin 1, beta, IL12B - interleukin 12b (natural killer cell stimulatory factor 2, cytotoxic lymphocyte maturation factor 2, p…
GO:0016192	vesicle-mediated transport	2.95e-07	1.65e-05	1.64	11488	780	918	102	62.1951	[SPIRE1 - spire actin nucleation factor 1, PSAP - prosaposin, SEC24D - sec24 family, member d (s. cerevisiae), DENND5A - denn/madd domain containing 5a, ORM1 - orosomucoid 1, RIN2 - ras and rab interactor 2, ORM2 - orosomucoid 2, COPB2 - coatomer protein complex, subunit beta 2 (beta prime), TMED2 - transmembrane emp24 domain trafficking protein 2, LDLR - low density lipoprotein receptor, CD59 - …
GO:2000377	regulation of reactive oxygen species metabolic process	3.06e-07	1.7e-05	2.91	11488	116	918	27	9.27835	[ICAM1 - intercellular adhesion molecule 1, SNCA - synuclein, alpha (non a4 component of amyloid precursor), STAT3 - signal transducer and activator of transcription 3 (acute-phase response factor), TICAM1 - toll-like receptor adaptor molecule 1, NFE2L2 - nuclear factor (erythroid-derived 2)-like 2, GRB2 - growth factor receptor-bound protein 2, PTK2B - protein tyrosine kinase 2 beta, PTGS2 - pro…
GO:0030595	leukocyte chemotaxis	3.13e-07	1.73e-05	3.23	11488	89	918	23	7.12074	[S100A12 - s100 calcium binding protein a12, FFAR2 - free fatty acid receptor 2, CCL19 - chemokine (c-c motif) ligand 19, CCR7 - chemokine (c-c motif) receptor 7, CCL3L3 - chemokine (c-c motif) ligand 3-like 3, CCL8 - chemokine (c-c motif) ligand 8, CXCL10 - chemokine (c-x-c motif) ligand 10, CCL2 - chemokine (c-c motif) ligand 2, IL1B - interleukin 1, beta, TREM1 - triggering receptor expressed …
GO:0009628	response to abiotic stimulus	3.14e-07	1.73e-05	1.69	11488	683	918	92	54.4379	[MICB - mhc class i polypeptide-related sequence b, BNIP3L - bcl2/adenovirus e1b 19kda interacting protein 3-like, PLAC8 - placenta-specific 8, SLC12A6 - solute carrier family 12 (potassium/chloride transporter), member 6, DENND5A - denn/madd domain containing 5a, IL12B - interleukin 12b (natural killer cell stimulatory factor 2, cytotoxic lymphocyte maturation factor 2, p40), RELA - v-rel avian …
GO:0023057	negative regulation of signaling	3.15e-07	1.73e-05	1.63	11488	791	918	103	63.1902	[DHX58 - dexh (asp-glu-x-his) box polypeptide 58, PNKD - paroxysmal nonkinesigenic dyskinesia, CDC42 - cell division cycle 42, TICAM1 - toll-like receptor adaptor molecule 1, RELA - v-rel avian reticuloendotheliosis viral oncogene homolog a, SPINK1 - serine peptidase inhibitor, kazal type 1, OSM - oncostatin m, LGALS3 - lectin, galactoside-binding, soluble, 3, DACT3 - dishevelled-binding antagoni…
GO:0097529	myeloid leukocyte migration	3.16e-07	1.73e-05	3.58	11488	70	918	20	5.58659	[S100A12 - s100 calcium binding protein a12, CCL19 - chemokine (c-c motif) ligand 19, CCR7 - chemokine (c-c motif) receptor 7, CCL3L3 - chemokine (c-c motif) ligand 3-like 3, CCL8 - chemokine (c-c motif) ligand 8, CCL2 - chemokine (c-c motif) ligand 2, IL1B - interleukin 1, beta, TREM1 - triggering receptor expressed on myeloid cells 1, CCL3 - chemokine (c-c motif) ligand 3, FCER1G - fc fragment …
GO:0002221	pattern recognition receptor signaling pathway	3.13e-07	1.74e-05	3.23	11488	89	918	23	7.12074	[CTSL - cathepsin l, FFAR2 - free fatty acid receptor 2, TNIP1 - tnfaip3 interacting protein 1, CTSB - cathepsin b, TNIP3 - tnfaip3 interacting protein 3, RIPK2 - receptor-interacting serine-threonine kinase 2, NFKBIA - nuclear factor of kappa light polypeptide gene enhancer in b-cells inhibitor, alpha, CTSS - cathepsin s, TICAM1 - toll-like receptor adaptor molecule 1, HAVCR2 - hepatitis a virus…
GO:0044419	interspecies interaction between organisms	3.39e-07	1.84e-05	1.73	11488	607	918	84	48.5549	[MICB - mhc class i polypeptide-related sequence b, BNIP3L - bcl2/adenovirus e1b 19kda interacting protein 3-like, DHX58 - dexh (asp-glu-x-his) box polypeptide 58, CDC42 - cell division cycle 42, CXCL9 - chemokine (c-x-c motif) ligand 9, VPS37C - vacuolar protein sorting 37 homolog c (s. cerevisiae), IL12B - interleukin 12b (natural killer cell stimulatory factor 2, cytotoxic lymphocyte maturatio…
GO:0002460	adaptive immune response based on somatic recombination of immune receptors built from immunoglobulin superfamily domains	3.42e-07	1.85e-05	4.26	11488	47	918	16	3.75587	[MICB - mhc class i polypeptide-related sequence b, CTSH - cathepsin h, ZP3 - zona pellucida glycoprotein 3 (sperm receptor), NFKB2 - nuclear factor of kappa light polypeptide gene enhancer in b-cells 2 (p49/p100), EBI3 - epstein-barr virus induced 3, ADAM17 - adam metallopeptidase domain 17, IL12B - interleukin 12b (natural killer cell stimulatory factor 2, cytotoxic lymphocyte maturation factor…
GO:0043065	positive regulation of apoptotic process	3.45e-07	1.86e-05	1.89	11488	430	918	65	34.3915	[BOK - bcl2-related ovarian killer, BNIP3L - bcl2/adenovirus e1b 19kda interacting protein 3-like, CDC42 - cell division cycle 42, CD274 - cd274 molecule, IL12B - interleukin 12b (natural killer cell stimulatory factor 2, cytotoxic lymphocyte maturation factor 2, p40), OSM - oncostatin m, CTNNA1 - catenin (cadherin-associated protein), alpha 1, 102kda, IDO1 - indoleamine 2,3-dioxygenase 1, ATF6 -…
GO:0055067	monovalent inorganic cation homeostasis	3.49e-07	1.88e-05	3.32	11488	83	918	22	6.62651	[ATP6V1G1 - atpase, h+ transporting, lysosomal 13kda, v1 subunit g1, ATP6V1E1 - atpase, h+ transporting, lysosomal 31kda, v1 subunit e1, ATP6V1F - atpase, h+ transporting, lysosomal 14kda, v1 subunit f, RAB7A - rab7a, member ras oncogene family, KCNJ2 - potassium inwardly-rectifying channel, subfamily j, member 2, ATP6V1A - atpase, h+ transporting, lysosomal 70kda, v1 subunit a, ATP6V1D - atpase,…
GO:0031663	lipopolysaccharide-mediated signaling pathway	3.56e-07	1.9e-05	5.56	11488	27	918	12	2.15827	[TNF - tumor necrosis factor, HCK - hemopoietic cell kinase, CD14 - cd14 molecule, LYN - v-yes-1 yamaguchi sarcoma viral related oncogene homolog, PTAFR - platelet-activating factor receptor, RIPK2 - receptor-interacting serine-threonine kinase 2, NFKBIA - nuclear factor of kappa light polypeptide gene enhancer in b-cells inhibitor, alpha, CCL2 - chemokine (c-c motif) ligand 2, IRAK2 - interleuki…
GO:0050921	positive regulation of chemotaxis	3.89e-07	2.07e-05	3.2	11488	90	918	23	7.1875	[CCL19 - chemokine (c-c motif) ligand 19, CCR7 - chemokine (c-c motif) receptor 7, STX4 - syntaxin 4, VEGFA - vascular endothelial growth factor a, STX3 - syntaxin 3, MET - met proto-oncogene, CXCL10 - chemokine (c-x-c motif) ligand 10, CXCL9 - chemokine (c-x-c motif) ligand 9, ADAM17 - adam metallopeptidase domain 17, CCL2 - chemokine (c-c motif) ligand 2, PLA2G7 - phospholipase a2, group vii (p…
GO:0019882	antigen processing and presentation	4e-07	2.12e-05	2.52	11488	169	918	34	13.4921	[NCF2 - neutrophil cytosolic factor 2, MICB - mhc class i polypeptide-related sequence b, MR1 - major histocompatibility complex, class i-related, ICAM1 - intercellular adhesion molecule 1, NCF4 - neutrophil cytosolic factor 4, 40kda, PSME2 - proteasome (prosome, macropain) activator subunit 2 (pa28 beta), SEC13 - sec13 homolog (s. cerevisiae), CANX - calnexin, SEC24D - sec24 family, member d (s.…
GO:0071346	cellular response to interferon-gamma	4.19e-07	2.21e-05	4.74	11488	37	918	14	2.95359	[CCL19 - chemokine (c-c motif) ligand 19, CCL3L3 - chemokine (c-c motif) ligand 3-like 3, CCL8 - chemokine (c-c motif) ligand 8, ASS1 - argininosuccinate synthase 1, CCL2 - chemokine (c-c motif) ligand 2, IL12B - interleukin 12b (natural killer cell stimulatory factor 2, cytotoxic lymphocyte maturation factor 2, p40), DAPK1 - death-associated protein kinase 1, CCL3 - chemokine (c-c motif) ligand …
GO:0043085	positive regulation of catalytic activity	4.4e-07	2.31e-05	1.52	11488	1060	918	129	84.8684	[BOK - bcl2-related ovarian killer, TRIB3 - tribbles homolog 3 (drosophila), NCF4 - neutrophil cytosolic factor 4, 40kda, AGAP3 - arfgap with gtpase domain, ankyrin repeat and ph domain 3, MAP3K8 - mitogen-activated protein kinase kinase kinase 8, CDC42 - cell division cycle 42, PSAP - prosaposin, DENND5A - denn/madd domain containing 5a, RIN2 - ras and rab interactor 2, SDC4 - syndecan 4, LCP2 -…
GO:0090383	phagosome acidification	4.41e-07	2.31e-05	5.99	11488	23	918	11	1.83639	[ATP6V1G1 - atpase, h+ transporting, lysosomal 13kda, v1 subunit g1, ATP6V1E1 - atpase, h+ transporting, lysosomal 31kda, v1 subunit e1, ATP6V1H - atpase, h+ transporting, lysosomal 50/57kda, v1 subunit h, ATP6V1F - atpase, h+ transporting, lysosomal 14kda, v1 subunit f, RAB7A - rab7a, member ras oncogene family, ATP6V0D1 - atpase, h+ transporting, lysosomal 38kda, v0 subunit d1, ATP6V0E1 - atpas…
GO:0050714	positive regulation of protein secretion	4.76e-07	2.49e-05	2.58	11488	155	918	32	12.4031	[FFAR2 - free fatty acid receptor 2, SERP1 - stress-associated endoplasmic reticulum protein 1, CLEC4E - c-type lectin domain family 4, member e, CD274 - cd274 molecule, TNFRSF4 - tumor necrosis factor receptor superfamily, member 4, PTGER4 - prostaglandin e receptor 4 (subtype ep4), CD14 - cd14 molecule, CD58 - cd58 molecule, NLRP3 - nlr family, pyrin domain containing 3, CASP5 - caspase 5, apop…
GO:0097530	granulocyte migration	5.3e-07	2.75e-05	3.94	11488	54	918	17	4.31472	[S100A12 - s100 calcium binding protein a12, CCL3L3 - chemokine (c-c motif) ligand 3-like 3, CCL8 - chemokine (c-c motif) ligand 8, CCL2 - chemokine (c-c motif) ligand 2, IL1B - interleukin 1, beta, TREM1 - triggering receptor expressed on myeloid cells 1, CCL3 - chemokine (c-c motif) ligand 3, FCER1G - fc fragment of ige, high affinity i, receptor for; gamma polypeptide, VAV1 - vav 1 guanine nuc…
GO:1901342	regulation of vasculature development	5.88e-07	3.05e-05	2.52	11488	164	918	33	13.0952	[C19orf10 - chromosome 19 open reading frame 10, STAT1 - signal transducer and activator of transcription 1, 91kda, SPHK1 - sphingosine kinase 1, DLL1 - delta-like 1 (drosophila), EGR1 - early growth response 1, SEMA4A - sema domain, immunoglobulin domain (ig), transmembrane domain (tm) and short cytoplasmic domain, (semaphorin) 4a, NFE2L2 - nuclear factor (erythroid-derived 2)-like 2, PTK2B - pr…
GO:0010942	positive regulation of cell death	6.04e-07	3.12e-05	1.84	11488	455	918	67	36.413	[BOK - bcl2-related ovarian killer, BNIP3L - bcl2/adenovirus e1b 19kda interacting protein 3-like, CDC42 - cell division cycle 42, CD274 - cd274 molecule, IL12B - interleukin 12b (natural killer cell stimulatory factor 2, cytotoxic lymphocyte maturation factor 2, p40), OSM - oncostatin m, CTNNA1 - catenin (cadherin-associated protein), alpha 1, 102kda, IDO1 - indoleamine 2,3-dioxygenase 1, ATF6 -…
GO:0002526	acute inflammatory response	6.15e-07	3.16e-05	4.61	11488	38	918	14	3.03688	[ICAM1 - intercellular adhesion molecule 1, F12 - coagulation factor xii (hageman factor), STAT3 - signal transducer and activator of transcription 3 (acute-phase response factor), ASS1 - argininosuccinate synthase 1, IL1B - interleukin 1, beta, ORM1 - orosomucoid 1, PLSCR1 - phospholipid scramblase 1, IL1A - interleukin 1, alpha, SERPINA1 - serpin peptidase inhibitor, clade a (alpha-1 antiprotei…
GO:0045765	regulation of angiogenesis	7.01e-07	3.59e-05	2.59	11488	150	918	31	11.9691	[C19orf10 - chromosome 19 open reading frame 10, STAT1 - signal transducer and activator of transcription 1, 91kda, SPHK1 - sphingosine kinase 1, DLL1 - delta-like 1 (drosophila), SEMA4A - sema domain, immunoglobulin domain (ig), transmembrane domain (tm) and short cytoplasmic domain, (semaphorin) 4a, NFE2L2 - nuclear factor (erythroid-derived 2)-like 2, PTK2B - protein tyrosine kinase 2 beta, PT…
GO:0050670	regulation of lymphocyte proliferation	7.56e-07	3.83e-05	2.63	11488	143	918	30	11.4068	[EBI3 - epstein-barr virus induced 3, CD274 - cd274 molecule, TICAM1 - toll-like receptor adaptor molecule 1, IL12B - interleukin 12b (natural killer cell stimulatory factor 2, cytotoxic lymphocyte maturation factor 2, p40), SDC4 - syndecan 4, IL23A - interleukin 23, alpha subunit p19, TNFRSF4 - tumor necrosis factor receptor superfamily, member 4, LYN - v-yes-1 yamaguchi sarcoma viral related on…
GO:0044092	negative regulation of molecular function	7.59e-07	3.83e-05	1.64	11488	726	918	95	57.9268	[TRIB3 - tribbles homolog 3 (drosophila), ELL - elongation factor rna polymerase ii, CSTB - cystatin b (stefin b), SOCS1 - suppressor of cytokine signaling 1, SPINK1 - serine peptidase inhibitor, kazal type 1, TMED2 - transmembrane emp24 domain trafficking protein 2, ANXA5 - annexin a5, ANKRD33 - ankyrin repeat domain 33, RDX - radixin, MKKS - mckusick-kaufman syndrome, CARD17 - caspase recruitme…
GO:0032944	regulation of mononuclear cell proliferation	7.56e-07	3.84e-05	2.63	11488	143	918	30	11.4068	[EBI3 - epstein-barr virus induced 3, TICAM1 - toll-like receptor adaptor molecule 1, IL12B - interleukin 12b (natural killer cell stimulatory factor 2, cytotoxic lymphocyte maturation factor 2, p40), CD274 - cd274 molecule, SDC4 - syndecan 4, IL23A - interleukin 23, alpha subunit p19, TNFRSF4 - tumor necrosis factor receptor superfamily, member 4, LYN - v-yes-1 yamaguchi sarcoma viral related on…
GO:0002274	myeloid leukocyte activation	7.67e-07	3.85e-05	3.28	11488	80	918	21	6.40244	[S100A12 - s100 calcium binding protein a12, S100A13 - s100 calcium binding protein a13, SBNO2 - strawberry notch homolog 2 (drosophila), BATF - basic leucine zipper transcription factor, atf-like, CSF2 - colony stimulating factor 2 (granulocyte-macrophage), UBD - ubiquitin d, JUN - jun proto-oncogene, SNCA - synuclein, alpha (non a4 component of amyloid precursor), TICAM1 - toll-like receptor ad…
GO:0002548	monocyte chemotaxis	7.56e-07	3.86e-05	5.74	11488	24	918	11	1.91638	[S100A12 - s100 calcium binding protein a12, CCL19 - chemokine (c-c motif) ligand 19, CCL3L3 - chemokine (c-c motif) ligand 3-like 3, CCL23 - chemokine (c-c motif) ligand 23, LGALS3 - lectin, galactoside-binding, soluble, 3, CCL8 - chemokine (c-c motif) ligand 8, CCL20 - chemokine (c-c motif) ligand 20, CCL2 - chemokine (c-c motif) ligand 2, IL6 - interleukin 6 (interferon, beta 2), CCL22 - chemo…
GO:0071621	granulocyte chemotaxis	8.92e-07	4.46e-05	4	11488	50	918	16	4	[S100A12 - s100 calcium binding protein a12, CCL3L3 - chemokine (c-c motif) ligand 3-like 3, CCL8 - chemokine (c-c motif) ligand 8, CCL2 - chemokine (c-c motif) ligand 2, TREM1 - triggering receptor expressed on myeloid cells 1, IL1B - interleukin 1, beta, CCL3 - chemokine (c-c motif) ligand 3, FCER1G - fc fragment of ige, high affinity i, receptor for; gamma polypeptide, VAV1 - vav 1 guanine nuc…
GO:0033572	transferrin transport	9.14e-07	4.55e-05	5.18	11488	29	918	12	2.3166	[SLC11A2 - solute carrier family 11 (proton-coupled divalent metal ion transporter), member 2, ATP6V1G1 - atpase, h+ transporting, lysosomal 13kda, v1 subunit g1, ATP6V1E1 - atpase, h+ transporting, lysosomal 31kda, v1 subunit e1, ATP6V1H - atpase, h+ transporting, lysosomal 50/57kda, v1 subunit h, MCOLN1 - mucolipin 1, ATP6V1F - atpase, h+ transporting, lysosomal 14kda, v1 subunit f, ATP6V0D1 - …
GO:1904018	positive regulation of vasculature development	9.24e-07	4.59e-05	2.97	11488	101	918	24	8.08081	[ZC3H12A - zinc finger ccch-type containing 12a, CTSH - cathepsin h, C19orf10 - chromosome 19 open reading frame 10, VEGFA - vascular endothelial growth factor a, CEACAM1 - carcinoembryonic antigen-related cell adhesion molecule 1 (biliary glycoprotein), SPHK1 - sphingosine kinase 1, IL1B - interleukin 1, beta, IL1A - interleukin 1, alpha, DLL1 - delta-like 1 (drosophila), EGR1 - early growth res…
GO:0050663	cytokine secretion	9.46e-07	4.68e-05	4.78	11488	34	918	13	2.71967	[S100A12 - s100 calcium binding protein a12, CCL19 - chemokine (c-c motif) ligand 19, CCR7 - chemokine (c-c motif) receptor 7, S100A13 - s100 calcium binding protein a13, RAB1A - rab1a, member ras oncogene family, ABCA1 - atp-binding cassette, sub-family a (abc1), member 1, TREM1 - triggering receptor expressed on myeloid cells 1, LYN - v-yes-1 yamaguchi sarcoma viral related oncogene homolog, LC…
GO:0008104	protein localization	9.77e-07	4.82e-05	1.47	11488	1201	918	141	95.9184	[ATP6V1F - atpase, h+ transporting, lysosomal 14kda, v1 subunit f, SEC13 - sec13 homolog (s. cerevisiae), SPIRE1 - spire actin nucleation factor 1, CDC42 - cell division cycle 42, PLEKHF2 - pleckstrin homology domain containing, family f (with fyve domain) member 2, TRAK1 - trafficking protein, kinesin binding 1, SEC24D - sec24 family, member d (s. cerevisiae), ABCA1 - atp-binding cassette, sub-f…
GO:0045766	positive regulation of angiogenesis	1.04e-06	5.12e-05	3.13	11488	88	918	22	7.02875	[ZC3H12A - zinc finger ccch-type containing 12a, CTSH - cathepsin h, C19orf10 - chromosome 19 open reading frame 10, VEGFA - vascular endothelial growth factor a, SPHK1 - sphingosine kinase 1, IL1B - interleukin 1, beta, IL1A - interleukin 1, alpha, DLL1 - delta-like 1 (drosophila), C3AR1 - complement component 3a receptor 1, C3 - complement component 3, NFE2L2 - nuclear factor (erythroid-derived…
GO:0050706	regulation of interleukin-1 beta secretion	1.25e-06	6.06e-05	5.51	11488	25	918	11	1.99637	[ZC3H12A - zinc finger ccch-type containing 12a, CCL19 - chemokine (c-c motif) ligand 19, GSDMD - gasdermin d, P2RX7 - purinergic receptor p2x, ligand-gated ion channel, 7, CCR7 - chemokine (c-c motif) receptor 7, NLRP3 - nlr family, pyrin domain containing 3, CASP5 - caspase 5, apoptosis-related cysteine peptidase, NOD2 - nucleotide-binding oligomerization domain containing 2, CASP1 - caspase 1,…
GO:0050708	regulation of protein secretion	1.26e-06	6.07e-05	2.09	11488	276	918	46	22.0096	[TNFRSF9 - tumor necrosis factor receptor superfamily, member 9, FFAR2 - free fatty acid receptor 2, CCR7 - chemokine (c-c motif) receptor 7, CLEC4E - c-type lectin domain family 4, member e, SERP1 - stress-associated endoplasmic reticulum protein 1, SOCS1 - suppressor of cytokine signaling 1, CD274 - cd274 molecule, TNFRSF4 - tumor necrosis factor receptor superfamily, member 4, PTGER4 - prostag…
GO:0009891	positive regulation of biosynthetic process	1.24e-06	6.09e-05	1.48	11488	1143	918	135	91.2162	[ELL - elongation factor rna polymerase ii, NDN - necdin, melanoma antigen (mage) family member, PLAC8 - placenta-specific 8, CDC42 - cell division cycle 42, EBI3 - epstein-barr virus induced 3, ABCA1 - atp-binding cassette, sub-family a (abc1), member 1, IL12B - interleukin 12b (natural killer cell stimulatory factor 2, cytotoxic lymphocyte maturation factor 2, p40), TICAM1 - toll-like receptor …
GO:0071674	mononuclear cell migration	1.25e-06	6.09e-05	5.51	11488	25	918	11	1.99637	[S100A12 - s100 calcium binding protein a12, CCL19 - chemokine (c-c motif) ligand 19, CCL3L3 - chemokine (c-c motif) ligand 3-like 3, CCL23 - chemokine (c-c motif) ligand 23, CCL8 - chemokine (c-c motif) ligand 8, LGALS3 - lectin, galactoside-binding, soluble, 3, CCL20 - chemokine (c-c motif) ligand 20, CCL2 - chemokine (c-c motif) ligand 2, IL6 - interleukin 6 (interferon, beta 2), CCL22 - chemo…
GO:0032651	regulation of interleukin-1 beta production	1.27e-06	6.09e-05	4.38	11488	40	918	14	3.19635	[ZC3H12A - zinc finger ccch-type containing 12a, CCL19 - chemokine (c-c motif) ligand 19, CCR7 - chemokine (c-c motif) receptor 7, P2RX7 - purinergic receptor p2x, ligand-gated ion channel, 7, SPHK1 - sphingosine kinase 1, CCL3 - chemokine (c-c motif) ligand 3, EGR1 - early growth response 1, GSDMD - gasdermin d, NLRP3 - nlr family, pyrin domain containing 3, TNFAIP3 - tumor necrosis factor, alph…
GO:0051094	positive regulation of developmental process	1.25e-06	6.1e-05	1.61	11488	754	918	97	60.2484	[CD83 - cd83 molecule, CDC42 - cell division cycle 42, CXCL9 - chemokine (c-x-c motif) ligand 9, SDCBP - syndecan binding protein (syntenin), IL12B - interleukin 12b (natural killer cell stimulatory factor 2, cytotoxic lymphocyte maturation factor 2, p40), RELA - v-rel avian reticuloendotheliosis viral oncogene homolog a, IDO1 - indoleamine 2,3-dioxygenase 1, AGRN - agrin, MKKS - mckusick-kaufman…
GO:0002688	regulation of leukocyte chemotaxis	1.34e-06	6.43e-05	3.29	11488	76	918	20	6.07903	[CCL19 - chemokine (c-c motif) ligand 19, CCR7 - chemokine (c-c motif) receptor 7, CXCL10 - chemokine (c-x-c motif) ligand 10, CXCL9 - chemokine (c-x-c motif) ligand 9, CCL2 - chemokine (c-c motif) ligand 2, ADAM17 - adam metallopeptidase domain 17, PLA2G7 - phospholipase a2, group vii (platelet-activating factor acetylhydrolase, plasma), CCR1 - chemokine (c-c motif) receptor 1, CCL3 - chemokine …
GO:0006915	apoptotic process	1.37e-06	6.51e-05	1.78	11488	484	918	69	38.764	[BOK - bcl2-related ovarian killer, TNFRSF9 - tumor necrosis factor receptor superfamily, member 9, MAP3K8 - mitogen-activated protein kinase kinase kinase 8, UBE2Z - ubiquitin-conjugating enzyme e2z, CLIC4 - chloride intracellular channel 4, PTK2B - protein tyrosine kinase 2 beta, SEMA6A - sema domain, transmembrane domain (tm), and cytoplasmic domain, (semaphorin) 6a, LGALS1 - lectin, galactosi…
GO:0072512	trivalent inorganic cation transport	1.41e-06	6.69e-05	5.01	11488	30	918	12	2.39521	[SLC11A2 - solute carrier family 11 (proton-coupled divalent metal ion transporter), member 2, ATP6V1G1 - atpase, h+ transporting, lysosomal 13kda, v1 subunit g1, ATP6V1E1 - atpase, h+ transporting, lysosomal 31kda, v1 subunit e1, ATP6V1H - atpase, h+ transporting, lysosomal 50/57kda, v1 subunit h, MCOLN1 - mucolipin 1, ATP6V1F - atpase, h+ transporting, lysosomal 14kda, v1 subunit f, ATP6V0D1 - …
GO:0015682	ferric iron transport	1.41e-06	6.71e-05	5.01	11488	30	918	12	2.39521	[SLC11A2 - solute carrier family 11 (proton-coupled divalent metal ion transporter), member 2, ATP6V1G1 - atpase, h+ transporting, lysosomal 13kda, v1 subunit g1, ATP6V1E1 - atpase, h+ transporting, lysosomal 31kda, v1 subunit e1, ATP6V1H - atpase, h+ transporting, lysosomal 50/57kda, v1 subunit h, ATP6V1F - atpase, h+ transporting, lysosomal 14kda, v1 subunit f, MCOLN1 - mucolipin 1, ATP6V0D1 - …
GO:1901699	cellular response to nitrogen compound	1.47e-06	6.96e-05	2.14	11488	252	918	43	20.0935	[TRIB3 - tribbles homolog 3 (drosophila), RALB - v-ral simian leukemia viral oncogene homolog b, ICAM1 - intercellular adhesion molecule 1, FLOT1 - flotillin 1, PTAFR - platelet-activating factor receptor, SNCA - synuclein, alpha (non a4 component of amyloid precursor), STAT1 - signal transducer and activator of transcription 1, 91kda, SOCS1 - suppressor of cytokine signaling 1, RHOQ - ras homolo…
GO:0032760	positive regulation of tumor necrosis factor production	1.49e-06	7.02e-05	4.08	11488	46	918	15	3.67647	[CCL19 - chemokine (c-c motif) ligand 19, PTAFR - platelet-activating factor receptor, RIPK2 - receptor-interacting serine-threonine kinase 2, CCL2 - chemokine (c-c motif) ligand 2, TICAM1 - toll-like receptor adaptor molecule 1, IL12B - interleukin 12b (natural killer cell stimulatory factor 2, cytotoxic lymphocyte maturation factor 2, p40), CCL3 - chemokine (c-c motif) ligand 3, HAVCR2 - hepati…
GO:0031328	positive regulation of cellular biosynthetic process	1.51e-06	7.07e-05	1.48	11488	1126	918	133	89.8649	[ELL - elongation factor rna polymerase ii, NDN - necdin, melanoma antigen (mage) family member, PLAC8 - placenta-specific 8, CDC42 - cell division cycle 42, EBI3 - epstein-barr virus induced 3, ABCA1 - atp-binding cassette, sub-family a (abc1), member 1, IL12B - interleukin 12b (natural killer cell stimulatory factor 2, cytotoxic lymphocyte maturation factor 2, p40), TICAM1 - toll-like receptor …
GO:0006979	response to oxidative stress	1.74e-06	8.1e-05	2.1	11488	262	918	44	20.9524	[MICB - mhc class i polypeptide-related sequence b, LONP1 - lon peptidase 1, mitochondrial, CCR7 - chemokine (c-c motif) receptor 7, ATP2A2 - atpase, ca++ transporting, cardiac muscle, slow twitch 2, PLK3 - polo-like kinase 3, JUN - jun proto-oncogene, SNCA - synuclein, alpha (non a4 component of amyloid precursor), STAT1 - signal transducer and activator of transcription 1, 91kda, RELA - v-rel a…
GO:0001101	response to acid chemical	1.83e-06	8.51e-05	2.36	11488	180	918	34	14.4068	[MICB - mhc class i polypeptide-related sequence b, ICAM1 - intercellular adhesion molecule 1, FFAR2 - free fatty acid receptor 2, PTAFR - platelet-activating factor receptor, SOCS1 - suppressor of cytokine signaling 1, ABCA1 - atp-binding cassette, sub-family a (abc1), member 1, CPEB4 - cytoplasmic polyadenylation element binding protein 4, RELA - v-rel avian reticuloendotheliosis viral oncogene…
GO:0031668	cellular response to extracellular stimulus	1.91e-06	8.86e-05	2.61	11488	134	918	28	10.728	[ICAM1 - intercellular adhesion molecule 1, RALB - v-ral simian leukemia viral oncogene homolog b, ATG7 - autophagy related 7, JUN - jun proto-oncogene, CPEB4 - cytoplasmic polyadenylation element binding protein 4, MAP1LC3A - microtubule-associated protein 1 light chain 3 alpha, NFE2L2 - nuclear factor (erythroid-derived 2)-like 2, MAP1LC3B - microtubule-associated protein 1 light chain 3 beta, …
GO:0042493	response to drug	1.92e-06	8.88e-05	2.14	11488	246	918	42	19.6262	[ICAM1 - intercellular adhesion molecule 1, JUN - jun proto-oncogene, SNCA - synuclein, alpha (non a4 component of amyloid precursor), STAT1 - signal transducer and activator of transcription 1, 91kda, JUNB - jun b proto-oncogene, STAT3 - signal transducer and activator of transcription 3 (acute-phase response factor), ADAM17 - adam metallopeptidase domain 17, ABCA1 - atp-binding cassette, sub-fa…
GO:0050878	regulation of body fluid levels	2.01e-06	9.25e-05	2.16	11488	238	918	41	18.9815	[F12 - coagulation factor xii (hageman factor), CDC42 - cell division cycle 42, USF2 - upstream transcription factor 2, c-fos interacting, STAT5A - signal transducer and activator of transcription 5a, HMG20B - high mobility group 20b, PLAU - plasminogen activator, urokinase, NFE2L2 - nuclear factor (erythroid-derived 2)-like 2, ANXA5 - annexin a5, LYN - v-yes-1 yamaguchi sarcoma viral related onc…
GO:0032735	positive regulation of interleukin-12 production	2.02e-06	9.25e-05	5.29	11488	26	918	11	2.0794	[IL23A - interleukin 23, alpha subunit p19, RELA - v-rel avian reticuloendotheliosis viral oncogene homolog a, CCL19 - chemokine (c-c motif) ligand 19, IRF1 - interferon regulatory factor 1, CCR7 - chemokine (c-c motif) receptor 7, IRF8 - interferon regulatory factor 8, IDO1 - indoleamine 2,3-dioxygenase 1, RIPK2 - receptor-interacting serine-threonine kinase 2, CD40 - cd40 molecule, tnf receptor…
GO:0048002	antigen processing and presentation of peptide antigen	2.05e-06	9.39e-05	2.56	11488	142	918	29	11.3281	[NCF2 - neutrophil cytosolic factor 2, MR1 - major histocompatibility complex, class i-related, NCF4 - neutrophil cytosolic factor 4, 40kda, PSME2 - proteasome (prosome, macropain) activator subunit 2 (pa28 beta), SEC13 - sec13 homolog (s. cerevisiae), CANX - calnexin, SEC24D - sec24 family, member d (s. cerevisiae), IFI30 - interferon, gamma-inducible protein 30, SLC11A1 - solute carrier family …
GO:0009968	negative regulation of signal transduction	2.26e-06	0.000103	1.6	11488	734	918	94	58.75	[DHX58 - dexh (asp-glu-x-his) box polypeptide 58, CDC42 - cell division cycle 42, SOCS1 - suppressor of cytokine signaling 1, TICAM1 - toll-like receptor adaptor molecule 1, RELA - v-rel avian reticuloendotheliosis viral oncogene homolog a, SPINK1 - serine peptidase inhibitor, kazal type 1, CTNNA1 - catenin (cadherin-associated protein), alpha 1, 102kda, LGALS3 - lectin, galactoside-binding, solu…
GO:0071229	cellular response to acid chemical	2.33e-06	0.000106	2.83	11488	106	918	24	8.48057	[ZC3H12A - zinc finger ccch-type containing 12a, FFAR2 - free fatty acid receptor 2, PTAFR - platelet-activating factor receptor, ADNP2 - adnp homeobox 2, SOCS1 - suppressor of cytokine signaling 1, CCL2 - chemokine (c-c motif) ligand 2, ASS1 - argininosuccinate synthase 1, ABCA1 - atp-binding cassette, sub-family a (abc1), member 1, RRAGD - ras-related gtp binding d, CPEB4 - cytoplasmic polyaden…
GO:0032870	cellular response to hormone stimulus	2.34e-06	0.000106	2.28	11488	198	918	36	15.7895	[TRIB3 - tribbles homolog 3 (drosophila), JUN - jun proto-oncogene, STAT1 - signal transducer and activator of transcription 1, 91kda, STAT3 - signal transducer and activator of transcription 3 (acute-phase response factor), JUNB - jun b proto-oncogene, RHOQ - ras homolog family member q, RELA - v-rel avian reticuloendotheliosis viral oncogene homolog a, PTGER4 - prostaglandin e receptor 4 (subty…
GO:0007159	leukocyte cell-cell adhesion	2.37e-06	0.000107	2.34	11488	182	918	34	14.5299	[MICB - mhc class i polypeptide-related sequence b, ICAM1 - intercellular adhesion molecule 1, CLEC4D - c-type lectin domain family 4, member d, CLEC4E - c-type lectin domain family 4, member e, BATF - basic leucine zipper transcription factor, atf-like, EBI3 - epstein-barr virus induced 3, ADAM17 - adam metallopeptidase domain 17, IL12B - interleukin 12b (natural killer cell stimulatory factor 2…
GO:0033036	macromolecule localization	2.37e-06	0.000107	1.45	11488	1220	918	141	97.2414	[ATP6V1F - atpase, h+ transporting, lysosomal 14kda, v1 subunit f, SEC13 - sec13 homolog (s. cerevisiae), SPIRE1 - spire actin nucleation factor 1, CDC42 - cell division cycle 42, PLEKHF2 - pleckstrin homology domain containing, family f (with fyve domain) member 2, TRAK1 - trafficking protein, kinesin binding 1, SEC24D - sec24 family, member d (s. cerevisiae), ABCA1 - atp-binding cassette, sub-f…
GO:0006826	iron ion transport	2.48e-06	0.000111	4.17	11488	42	918	14	3.35731	[ATP6V1E1 - atpase, h+ transporting, lysosomal 31kda, v1 subunit e1, ATP6V1G1 - atpase, h+ transporting, lysosomal 13kda, v1 subunit g1, ATP6V1F - atpase, h+ transporting, lysosomal 14kda, v1 subunit f, MCOLN1 - mucolipin 1, ATP6V1A - atpase, h+ transporting, lysosomal 70kda, v1 subunit a, ATP6V1D - atpase, h+ transporting, lysosomal 34kda, v1 subunit d, ATP6V1B2 - atpase, h+ transporting, lysoso…
GO:0002573	myeloid leukocyte differentiation	2.58e-06	0.000115	3.41	11488	66	918	18	5.27859	[CCL19 - chemokine (c-c motif) ligand 19, VEGFA - vascular endothelial growth factor a, CCR7 - chemokine (c-c motif) receptor 7, CSF3 - colony stimulating factor 3 (granulocyte), BATF - basic leucine zipper transcription factor, atf-like, CSF2 - colony stimulating factor 2 (granulocyte-macrophage), UBD - ubiquitin d, JUN - jun proto-oncogene, CDC42 - cell division cycle 42, JUNB - jun b proto-onc…
GO:0006885	regulation of pH	2.58e-06	0.000115	3.41	11488	66	918	18	5.27859	[ATP6V1G1 - atpase, h+ transporting, lysosomal 13kda, v1 subunit g1, ATP6V1E1 - atpase, h+ transporting, lysosomal 31kda, v1 subunit e1, ATP6V1F - atpase, h+ transporting, lysosomal 14kda, v1 subunit f, RAB7A - rab7a, member ras oncogene family, ATP6V1A - atpase, h+ transporting, lysosomal 70kda, v1 subunit a, ATP6V1D - atpase, h+ transporting, lysosomal 34kda, v1 subunit d, RAB20 - rab20, member…
GO:1903557	positive regulation of tumor necrosis factor superfamily cytokine production	2.74e-06	0.000122	3.91	11488	48	918	15	3.83632	[CCL19 - chemokine (c-c motif) ligand 19, PTAFR - platelet-activating factor receptor, RIPK2 - receptor-interacting serine-threonine kinase 2, CCL2 - chemokine (c-c motif) ligand 2, IL12B - interleukin 12b (natural killer cell stimulatory factor 2, cytotoxic lymphocyte maturation factor 2, p40), TICAM1 - toll-like receptor adaptor molecule 1, HAVCR2 - hepatitis a virus cellular receptor 2, CCL3 -…
GO:0051090	regulation of sequence-specific DNA binding transcription factor activity	2.79e-06	0.000123	2.09	11488	258	918	43	20.5742	[ICAM1 - intercellular adhesion molecule 1, NFKBID - nuclear factor of kappa light polypeptide gene enhancer in b-cells inhibitor, delta, JUN - jun proto-oncogene, TRIB1 - tribbles homolog 1 (drosophila), SPHK1 - sphingosine kinase 1, TICAM1 - toll-like receptor adaptor molecule 1, TNFRSF4 - tumor necrosis factor receptor superfamily, member 4, RELA - v-rel avian reticuloendotheliosis viral oncog…
GO:0007154	cell communication	2.88e-06	0.000127	1.79	11488	447	918	64	35.7542	[SLC12A6 - solute carrier family 12 (potassium/chloride transporter), member 6, CDC42 - cell division cycle 42, NMB - neuromedin b, FCHSD2 - fch and double sh3 domains 2, CXCL9 - chemokine (c-x-c motif) ligand 9, SDCBP - syndecan binding protein (syntenin), MAP1LC3B - microtubule-associated protein 1 light chain 3 beta, ATF3 - activating transcription factor 3, XBP1 - x-box binding protein 1, UPP…
GO:0045944	positive regulation of transcription from RNA polymerase II promoter	2.96e-06	0.00013	1.63	11488	669	918	87	53.3742	[ARID3A - at rich interactive domain 3a (bright-like), ELL - elongation factor rna polymerase ii, SBNO2 - strawberry notch homolog 2 (drosophila), NDN - necdin, melanoma antigen (mage) family member, PLAC8 - placenta-specific 8, USF2 - upstream transcription factor 2, c-fos interacting, RHOQ - ras homolog family member q, IL23A - interleukin 23, alpha subunit p19, RELA - v-rel avian reticuloendot…
GO:0010038	response to metal ion	2.98e-06	0.00013	2.25	11488	200	918	36	16	[ICAM1 - intercellular adhesion molecule 1, LONP1 - lon peptidase 1, mitochondrial, D2HGDH - d-2-hydroxyglutarate dehydrogenase, JUN - jun proto-oncogene, SNCA - synuclein, alpha (non a4 component of amyloid precursor), JUNB - jun b proto-oncogene, AHCYL1 - adenosylhomocysteinase-like 1, CA2 - carbonic anhydrase ii, CD14 - cd14 molecule, PTK2B - protein tyrosine kinase 2 beta, NDRG1 - n-myc downs…
GO:0032940	secretion by cell	3.2e-06	0.000139	2	11488	294	918	47	23.5	[ARFGAP3 - adp-ribosylation factor gtpase activating protein 3, CCR7 - chemokine (c-c motif) receptor 7, CANX - calnexin, MYH10 - myosin, heavy chain 10, non-muscle, PSAP - prosaposin, ABCA1 - atp-binding cassette, sub-family a (abc1), member 1, ALDOA - aldolase a, fructose-bisphosphate, CCR1 - chemokine (c-c motif) receptor 1, ORM1 - orosomucoid 1, ORM2 - orosomucoid 2, LYN - v-yes-1 yamaguchi s…
GO:0046466	membrane lipid catabolic process	3.21e-06	0.000139	6.26	11488	18	918	9	1.4377	[NEU1 - sialidase 1 (lysosomal sialidase), GALC - galactosylceramidase, GBA - glucosidase, beta, acid, GBA3 - glucosidase, beta, acid 3, CYP1B1 - cytochrome p450, family 1, subfamily b, polypeptide 1, GM2A - gm2 ganglioside activator, SPHK1 - sphingosine kinase 1, SMPD1 - sphingomyelin phosphodiesterase 1, acid lysosomal, NEU4 - sialidase 4]
GO:0042832	defense response to protozoan	3.21e-06	0.00014	6.26	11488	18	918	9	1.4377	[SLC11A1 - solute carrier family 11 (proton-coupled divalent metal ion transporter), member 1, BCL3 - b-cell cll/lymphoma 3, IRF8 - interferon regulatory factor 8, BATF - basic leucine zipper transcription factor, atf-like, CD40 - cd40 molecule, tnf receptor superfamily member 5, IL6 - interleukin 6 (interferon, beta 2), BATF2 - basic leucine zipper transcription factor, atf-like 2, IL12B - inter…
GO:0071417	cellular response to organonitrogen compound	3.26e-06	0.000141	2.14	11488	234	918	40	18.6916	[TRIB3 - tribbles homolog 3 (drosophila), ICAM1 - intercellular adhesion molecule 1, PTAFR - platelet-activating factor receptor, SNCA - synuclein, alpha (non a4 component of amyloid precursor), STAT1 - signal transducer and activator of transcription 1, 91kda, SOCS1 - suppressor of cytokine signaling 1, RHOQ - ras homolog family member q, CPEB4 - cytoplasmic polyadenylation element binding prote…
GO:0009306	protein secretion	3.36e-06	0.000145	3.02	11488	87	918	21	6.95364	[S100A12 - s100 calcium binding protein a12, ARFGAP3 - adp-ribosylation factor gtpase activating protein 3, CCL19 - chemokine (c-c motif) ligand 19, S100A13 - s100 calcium binding protein a13, CCR7 - chemokine (c-c motif) receptor 7, CANX - calnexin, IL1RN - interleukin 1 receptor antagonist, RAB1A - rab1a, member ras oncogene family, M6PR - mannose-6-phosphate receptor (cation dependent), ABCA1 …
GO:0070372	regulation of ERK1 and ERK2 cascade	3.42e-06	0.000147	2.41	11488	161	918	31	12.8631	[ICAM1 - intercellular adhesion molecule 1, CCL3L3 - chemokine (c-c motif) ligand 3-like 3, CCR7 - chemokine (c-c motif) receptor 7, JUN - jun proto-oncogene, CCR1 - chemokine (c-c motif) receptor 1, LYN - v-yes-1 yamaguchi sarcoma viral related oncogene homolog, PTK2B - protein tyrosine kinase 2 beta, ATF3 - activating transcription factor 3, CHI3L1 - chitinase 3-like 1 (cartilage glycoprotein-3…
GO:0051223	regulation of protein transport	3.49e-06	0.000149	1.71	11488	535	918	73	42.6901	[TNFRSF9 - tumor necrosis factor receptor superfamily, member 9, BNIP3L - bcl2/adenovirus e1b 19kda interacting protein 3-like, CDC42 - cell division cycle 42, SOCS1 - suppressor of cytokine signaling 1, IL12B - interleukin 12b (natural killer cell stimulatory factor 2, cytotoxic lymphocyte maturation factor 2, p40), CD274 - cd274 molecule, IL23A - interleukin 23, alpha subunit p19, ZBTB17 - zinc…
GO:0031295	T cell costimulation	3.53e-06	0.00015	3.49	11488	61	918	17	4.87106	[CCL19 - chemokine (c-c motif) ligand 19, TNFRSF14 - tumor necrosis factor receptor superfamily, member 14, MAP3K8 - mitogen-activated protein kinase kinase kinase 8, CDC42 - cell division cycle 42, CD274 - cd274 molecule, HLA-DRA - major histocompatibility complex, class ii, dr alpha, GRB2 - growth factor receptor-bound protein 2, HLA-DQB1 - major histocompatibility complex, class ii, dq beta 1,…
GO:0030641	regulation of cellular pH	3.53e-06	0.000151	3.49	11488	61	918	17	4.87106	[ATP6V1G1 - atpase, h+ transporting, lysosomal 13kda, v1 subunit g1, ATP6V1E1 - atpase, h+ transporting, lysosomal 31kda, v1 subunit e1, ATP6V1F - atpase, h+ transporting, lysosomal 14kda, v1 subunit f, RAB7A - rab7a, member ras oncogene family, ATP6V1A - atpase, h+ transporting, lysosomal 70kda, v1 subunit a, ATP6V1D - atpase, h+ transporting, lysosomal 34kda, v1 subunit d, RAB20 - rab20, member…
GO:0002708	positive regulation of lymphocyte mediated immunity	3.68e-06	0.000156	3.64	11488	55	918	16	4.3956	[RSAD2 - radical s-adenosyl methionine domain containing 2, LAMP1 - lysosomal-associated membrane protein 1, P2RX7 - purinergic receptor p2x, ligand-gated ion channel, 7, ZP3 - zona pellucida glycoprotein 3 (sperm receptor), IL1B - interleukin 1, beta, CD40 - cd40 molecule, tnf receptor superfamily member 5, IL12B - interleukin 12b (natural killer cell stimulatory factor 2, cytotoxic lymphocyte m…
GO:0070201	regulation of establishment of protein localization	3.71e-06	0.000157	1.66	11488	594	918	79	47.5904	[TNFRSF9 - tumor necrosis factor receptor superfamily, member 9, BNIP3L - bcl2/adenovirus e1b 19kda interacting protein 3-like, CDC42 - cell division cycle 42, SOCS1 - suppressor of cytokine signaling 1, RHOQ - ras homolog family member q, IL12B - interleukin 12b (natural killer cell stimulatory factor 2, cytotoxic lymphocyte maturation factor 2, p40), CD274 - cd274 molecule, IL23A - interleukin …
GO:0002703	regulation of leukocyte mediated immunity	3.75e-06	0.000158	2.7	11488	116	918	25	9.25926	[PTAFR - platelet-activating factor receptor, IL12B - interleukin 12b (natural killer cell stimulatory factor 2, cytotoxic lymphocyte maturation factor 2, p40), IL23A - interleukin 23, alpha subunit p19, LYN - v-yes-1 yamaguchi sarcoma viral related oncogene homolog, NLRP3 - nlr family, pyrin domain containing 3, TFRC - transferrin receptor (p90, cd71), IFNG - interferon, gamma, RSAD2 - radical s…
GO:0043900	regulation of multi-organism process	3.78e-06	0.000159	2.01	11488	287	918	46	22.8856	[MICB - mhc class i polypeptide-related sequence b, DHX58 - dexh (asp-glu-x-his) box polypeptide 58, PTAFR - platelet-activating factor receptor, TRIB1 - tribbles homolog 1 (drosophila), JUN - jun proto-oncogene, STAT1 - signal transducer and activator of transcription 1, 91kda, SQSTM1 - sequestosome 1, IL12B - interleukin 12b (natural killer cell stimulatory factor 2, cytotoxic lymphocyte matura…
GO:0042129	regulation of T cell proliferation	3.93e-06	0.000165	2.76	11488	109	918	24	8.69565	[CCL19 - chemokine (c-c motif) ligand 19, ZP3 - zona pellucida glycoprotein 3 (sperm receptor), TNFRSF14 - tumor necrosis factor receptor superfamily, member 14, RIPK2 - receptor-interacting serine-threonine kinase 2, EBI3 - epstein-barr virus induced 3, IL1B - interleukin 1, beta, IL12B - interleukin 12b (natural killer cell stimulatory factor 2, cytotoxic lymphocyte maturation factor 2, p40), C…
GO:0040008	regulation of growth	3.99e-06	0.000166	1.81	11488	414	918	60	33.1492	[NDN - necdin, melanoma antigen (mage) family member, PLAC8 - placenta-specific 8, CREG1 - cellular repressor of e1a-stimulated genes 1, CDC42 - cell division cycle 42, SOCS1 - suppressor of cytokine signaling 1, SDCBP - syndecan binding protein (syntenin), SPP1 - secreted phosphoprotein 1, IL12B - interleukin 12b (natural killer cell stimulatory factor 2, cytotoxic lymphocyte maturation factor 2…
GO:1903706	regulation of hemopoiesis	4.05e-06	0.000168	2.12	11488	236	918	40	18.8679	[NFKBID - nuclear factor of kappa light polypeptide gene enhancer in b-cells inhibitor, delta, JUN - jun proto-oncogene, TRIB1 - tribbles homolog 1 (drosophila), CD83 - cd83 molecule, CCR1 - chemokine (c-c motif) receptor 1, IL12B - interleukin 12b (natural killer cell stimulatory factor 2, cytotoxic lymphocyte maturation factor 2, p40), ACVR1B - activin a receptor, type ib, DLL1 - delta-like 1 (…
GO:0002224	toll-like receptor signaling pathway	4.12e-06	0.000171	3.31	11488	68	918	18	5.43807	[CTSL - cathepsin l, TNIP1 - tnfaip3 interacting protein 1, CTSB - cathepsin b, NFKBIA - nuclear factor of kappa light polypeptide gene enhancer in b-cells inhibitor, alpha, TNIP3 - tnfaip3 interacting protein 3, RIPK2 - receptor-interacting serine-threonine kinase 2, CTSS - cathepsin s, TICAM1 - toll-like receptor adaptor molecule 1, HAVCR2 - hepatitis a virus cellular receptor 2, IKBKE - inhibi…
GO:0043123	positive regulation of I-kappaB kinase/NF-kappaB signaling	4.39e-06	0.000181	2.42	11488	155	918	30	12.3967	[CCR7 - chemokine (c-c motif) receptor 7, UBD - ubiquitin d, LITAF - lipopolysaccharide-induced tnf factor, TMEM101 - transmembrane protein 101, SPHK1 - sphingosine kinase 1, IL12B - interleukin 12b (natural killer cell stimulatory factor 2, cytotoxic lymphocyte maturation factor 2, p40), TICAM1 - toll-like receptor adaptor molecule 1, RELA - v-rel avian reticuloendotheliosis viral oncogene homol…
GO:2000106	regulation of leukocyte apoptotic process	4.51e-06	0.000185	3.43	11488	62	918	17	4.95627	[CCL19 - chemokine (c-c motif) ligand 19, P2RX7 - purinergic receptor p2x, ligand-gated ion channel, 7, CCR7 - chemokine (c-c motif) receptor 7, NFKBID - nuclear factor of kappa light polypeptide gene enhancer in b-cells inhibitor, delta, HCAR2 - hydroxycarboxylic acid receptor 2, ADAM17 - adam metallopeptidase domain 17, CD274 - cd274 molecule, LYN - v-yes-1 yamaguchi sarcoma viral related oncog…
GO:0031294	lymphocyte costimulation	4.51e-06	0.000186	3.43	11488	62	918	17	4.95627	[CCL19 - chemokine (c-c motif) ligand 19, TNFRSF14 - tumor necrosis factor receptor superfamily, member 14, MAP3K8 - mitogen-activated protein kinase kinase kinase 8, CDC42 - cell division cycle 42, CD274 - cd274 molecule, HLA-DRA - major histocompatibility complex, class ii, dr alpha, GRB2 - growth factor receptor-bound protein 2, HLA-DQB1 - major histocompatibility complex, class ii, dq beta 1,…
GO:0002474	antigen processing and presentation of peptide antigen via MHC class I	4.55e-06	0.000186	3.17	11488	75	918	19	5.99369	[MR1 - major histocompatibility complex, class i-related, NCF2 - neutrophil cytosolic factor 2, NCF4 - neutrophil cytosolic factor 4, 40kda, PSMB2 - proteasome (prosome, macropain) subunit, beta type, 2, SAR1B - sar1 homolog b (s. cerevisiae), PSMA6 - proteasome (prosome, macropain) subunit, alpha type, 6, PSME2 - proteasome (prosome, macropain) activator subunit 2 (pa28 beta), SEC13 - sec13 homo…
GO:0032732	positive regulation of interleukin-1 production	4.63e-06	0.000189	4.55	11488	33	918	12	2.63736	[EGR1 - early growth response 1, CCL19 - chemokine (c-c motif) ligand 19, GSDMD - gasdermin d, P2RX7 - purinergic receptor p2x, ligand-gated ion channel, 7, NLRP3 - nlr family, pyrin domain containing 3, CASP5 - caspase 5, apoptosis-related cysteine peptidase, CCL20 - chemokine (c-c motif) ligand 20, NOD2 - nucleotide-binding oligomerization domain containing 2, CASP1 - caspase 1, apoptosis-relat…
GO:0050704	regulation of interleukin-1 secretion	4.83e-06	0.000196	4.92	11488	28	918	11	2.23577	[ZC3H12A - zinc finger ccch-type containing 12a, CCL19 - chemokine (c-c motif) ligand 19, GSDMD - gasdermin d, P2RX7 - purinergic receptor p2x, ligand-gated ion channel, 7, CCR7 - chemokine (c-c motif) receptor 7, NLRP3 - nlr family, pyrin domain containing 3, CASP5 - caspase 5, apoptosis-related cysteine peptidase, NOD2 - nucleotide-binding oligomerization domain containing 2, CASP1 - caspase 1,…
GO:0070486	leukocyte aggregation	5.09e-06	0.000207	2.37	11488	164	918	31	13.0802	[MICB - mhc class i polypeptide-related sequence b, ICAM1 - intercellular adhesion molecule 1, CLEC4D - c-type lectin domain family 4, member d, CLEC4E - c-type lectin domain family 4, member e, BATF - basic leucine zipper transcription factor, atf-like, EBI3 - epstein-barr virus induced 3, ADAM17 - adam metallopeptidase domain 17, IL12B - interleukin 12b (natural killer cell stimulatory factor 2…
GO:0071407	cellular response to organic cyclic compound	5.17e-06	0.000209	2.17	11488	213	918	37	17.0507	[RALB - v-ral simian leukemia viral oncogene homolog b, FLOT1 - flotillin 1, PTAFR - platelet-activating factor receptor, STAT1 - signal transducer and activator of transcription 1, 91kda, SNCA - synuclein, alpha (non a4 component of amyloid precursor), STAT3 - signal transducer and activator of transcription 3 (acute-phase response factor), ABCA1 - atp-binding cassette, sub-family a (abc1), memb…
GO:0001562	response to protozoan	5.67e-06	0.000228	5.93	11488	19	918	9	1.51771	[SLC11A1 - solute carrier family 11 (proton-coupled divalent metal ion transporter), member 1, BCL3 - b-cell cll/lymphoma 3, IRF8 - interferon regulatory factor 8, BATF - basic leucine zipper transcription factor, atf-like, CD40 - cd40 molecule, tnf receptor superfamily member 5, BATF2 - basic leucine zipper transcription factor, atf-like 2, IL6 - interleukin 6 (interferon, beta 2), IL12B - inter…
GO:0042594	response to starvation	6.07e-06	0.000244	2.63	11488	119	918	25	9.5057	[RALB - v-ral simian leukemia viral oncogene homolog b, ATG7 - autophagy related 7, JUN - jun proto-oncogene, CPEB4 - cytoplasmic polyadenylation element binding protein 4, MAP1LC3A - microtubule-associated protein 1 light chain 3 alpha, NFE2L2 - nuclear factor (erythroid-derived 2)-like 2, MAP1LC3B - microtubule-associated protein 1 light chain 3 beta, GCGR - glucagon receptor, UPP1 - uridine ph…
GO:1902532	negative regulation of intracellular signal transduction	6.26e-06	0.000249	1.91	11488	328	918	50	26.178	[DHX58 - dexh (asp-glu-x-his) box polypeptide 58, SOCS1 - suppressor of cytokine signaling 1, RELA - v-rel avian reticuloendotheliosis viral oncogene homolog a, SPINK1 - serine peptidase inhibitor, kazal type 1, ATF3 - activating transcription factor 3, XBP1 - x-box binding protein 1, GSTO1 - glutathione s-transferase omega 1, ZC3H12A - zinc finger ccch-type containing 12a, P2RX7 - purinergic rec…
GO:0002449	lymphocyte mediated immunity	6.25e-06	0.00025	3.89	11488	45	918	14	3.59897	[MICB - mhc class i polypeptide-related sequence b, CTSH - cathepsin h, ZP3 - zona pellucida glycoprotein 3 (sperm receptor), SLAMF7 - slam family member 7, MYO1G - myosin ig, SLC11A1 - solute carrier family 11 (proton-coupled divalent metal ion transporter), member 1, BCL3 - b-cell cll/lymphoma 3, JAG1 - jagged 1, HLA-DQB1 - major histocompatibility complex, class ii, dq beta 1, IRF7 - interfero…
GO:0045672	positive regulation of osteoclast differentiation	6.25e-06	0.00025	6.67	11488	15	918	8	1.1994	[IL23A - interleukin 23, alpha subunit p19, TNF - tumor necrosis factor, FOS - fbj murine osteosarcoma viral oncogene homolog, CA2 - carbonic anhydrase ii, KLF10 - kruppel-like factor 10, IL12B - interleukin 12b (natural killer cell stimulatory factor 2, cytotoxic lymphocyte maturation factor 2, p40), CCR1 - chemokine (c-c motif) receptor 1, IFNG - interferon, gamma]
GO:0051607	defense response to virus	6.55e-06	0.00026	2.56	11488	127	918	26	10.1562	[DDIT4 - dna-damage-inducible transcript 4, ATG7 - autophagy related 7, BNIP3L - bcl2/adenovirus e1b 19kda interacting protein 3-like, DHX58 - dexh (asp-glu-x-his) box polypeptide 58, STAT2 - signal transducer and activator of transcription 2, 113kda, STAT1 - signal transducer and activator of transcription 1, 91kda, CXCL9 - chemokine (c-x-c motif) ligand 9, IL12B - interleukin 12b (natural kille…
GO:0032102	negative regulation of response to external stimulus	6.58e-06	0.00026	2.3	11488	174	918	32	13.913	[MICB - mhc class i polypeptide-related sequence b, DHX58 - dexh (asp-glu-x-his) box polypeptide 58, F12 - coagulation factor xii (hageman factor), TRIB1 - tribbles homolog 1 (drosophila), SPP1 - secreted phosphoprotein 1, IL12B - interleukin 12b (natural killer cell stimulatory factor 2, cytotoxic lymphocyte maturation factor 2, p40), SEMA4A - sema domain, immunoglobulin domain (ig), transmembra…
GO:0002768	immune response-regulating cell surface receptor signaling pathway	6.69e-06	0.000264	2.04	11488	258	918	42	20.5882	[MICB - mhc class i polypeptide-related sequence b, FFAR2 - free fatty acid receptor 2, CLEC4E - c-type lectin domain family 4, member e, CLEC4D - c-type lectin domain family 4, member d, PSME2 - proteasome (prosome, macropain) activator subunit 2 (pa28 beta), JUN - jun proto-oncogene, CDC42 - cell division cycle 42, SPG21 - spastic paraplegia 21 (autosomal recessive, mast syndrome), RELA - v-rel…
GO:0051051	negative regulation of transport	6.75e-06	0.000266	1.95	11488	302	918	47	24.1026	[TNFRSF9 - tumor necrosis factor receptor superfamily, member 9, ICAM1 - intercellular adhesion molecule 1, PNKD - paroxysmal nonkinesigenic dyskinesia, SNCA - synuclein, alpha (non a4 component of amyloid precursor), LITAF - lipopolysaccharide-induced tnf factor, NMB - neuromedin b, SDCBP - syndecan binding protein (syntenin), PTGER4 - prostaglandin e receptor 4 (subtype ep4), SPINK1 - serine pe…
GO:0016241	regulation of macroautophagy	6.82e-06	0.000268	2.74	11488	105	918	23	8.39416	[ATP6V1G1 - atpase, h+ transporting, lysosomal 13kda, v1 subunit g1, ATP6V1E1 - atpase, h+ transporting, lysosomal 31kda, v1 subunit e1, RALB - v-ral simian leukemia viral oncogene homolog b, GBA - glucosidase, beta, acid, BNIP3L - bcl2/adenovirus e1b 19kda interacting protein 3-like, ATG7 - autophagy related 7, RAB7A - rab7a, member ras oncogene family, HK2 - hexokinase 2, RIPK2 - receptor-inter…
GO:0048247	lymphocyte chemotaxis	7.03e-06	0.000275	5.21	11488	24	918	10	1.91939	[CCL19 - chemokine (c-c motif) ligand 19, CXCL16 - chemokine (c-x-c motif) ligand 16, CCL3L3 - chemokine (c-c motif) ligand 3-like 3, CCL23 - chemokine (c-c motif) ligand 23, CCL8 - chemokine (c-c motif) ligand 8, CXCL10 - chemokine (c-x-c motif) ligand 10, CCL20 - chemokine (c-c motif) ligand 20, CCL2 - chemokine (c-c motif) ligand 2, CCL22 - chemokine (c-c motif) ligand 22, CCL3 - chemokine (c-…
GO:0043270	positive regulation of ion transport	7.62e-06	0.000297	2.66	11488	113	918	24	9.02256	[P2RX4 - purinergic receptor p2x, ligand-gated ion channel, 4, P2RX7 - purinergic receptor p2x, ligand-gated ion channel, 7, ZP3 - zona pellucida glycoprotein 3 (sperm receptor), PTAFR - platelet-activating factor receptor, SCN1B - sodium channel, voltage-gated, type i, beta subunit, SNCA - synuclein, alpha (non a4 component of amyloid precursor), KCNJ2 - potassium inwardly-rectifying channel, su…
GO:0006928	movement of cell or subcellular component	7.64e-06	0.000297	1.54	11488	796	918	98	63.6364	[SIRPA - signal-regulatory protein alpha, NDN - necdin, melanoma antigen (mage) family member, CDC42 - cell division cycle 42, CXCL9 - chemokine (c-x-c motif) ligand 9, IER2 - immediate early response 2, IL12B - interleukin 12b (natural killer cell stimulatory factor 2, cytotoxic lymphocyte maturation factor 2, p40), SDC4 - syndecan 4, CD58 - cd58 molecule, LGALS3 - lectin, galactoside-binding, s…
GO:1903426	regulation of reactive oxygen species biosynthetic process	8.3e-06	0.000322	3.61	11488	52	918	15	4.15512	[P2RX4 - purinergic receptor p2x, ligand-gated ion channel, 4, ZC3H12A - zinc finger ccch-type containing 12a, ICAM1 - intercellular adhesion molecule 1, SNCA - synuclein, alpha (non a4 component of amyloid precursor), STAT3 - signal transducer and activator of transcription 3 (acute-phase response factor), ASS1 - argininosuccinate synthase 1, IL1B - interleukin 1, beta, TICAM1 - toll-like recept…
GO:0008285	negative regulation of cell proliferation	8.65e-06	0.000335	1.75	11488	443	918	62	35.4286	[TNFRSF9 - tumor necrosis factor receptor superfamily, member 9, CCL3L3 - chemokine (c-c motif) ligand 3-like 3, NDN - necdin, melanoma antigen (mage) family member, BTG3 - btg family, member 3, CD274 - cd274 molecule, IFI30 - interferon, gamma-inducible protein 30, IL12B - interleukin 12b (natural killer cell stimulatory factor 2, cytotoxic lymphocyte maturation factor 2, p40), SDC4 - syndecan 4…
GO:0050920	regulation of chemotaxis	8.82e-06	0.00034	2.52	11488	129	918	26	10.3175	[CCR7 - chemokine (c-c motif) receptor 7, CXCL9 - chemokine (c-x-c motif) ligand 9, ADAM17 - adam metallopeptidase domain 17, PLA2G7 - phospholipase a2, group vii (platelet-activating factor acetylhydrolase, plasma), CCR1 - chemokine (c-c motif) receptor 1, IL23A - interleukin 23, alpha subunit p19, SEMA4A - sema domain, immunoglobulin domain (ig), transmembrane domain (tm) and short cytoplasmic …
GO:0072676	lymphocyte migration	9.37e-06	0.00036	4.29	11488	35	918	12	2.7972	[CCL19 - chemokine (c-c motif) ligand 19, CXCL16 - chemokine (c-x-c motif) ligand 16, CCL3L3 - chemokine (c-c motif) ligand 3-like 3, CCR7 - chemokine (c-c motif) receptor 7, CCL23 - chemokine (c-c motif) ligand 23, CCL8 - chemokine (c-c motif) ligand 8, CXCL10 - chemokine (c-x-c motif) ligand 10, CCL20 - chemokine (c-c motif) ligand 20, CCL2 - chemokine (c-c motif) ligand 2, CCL22 - chemokine (c…
GO:0050718	positive regulation of interleukin-1 beta secretion	9.57e-06	0.000367	5.63	11488	20	918	9	1.59858	[CCL19 - chemokine (c-c motif) ligand 19, GSDMD - gasdermin d, P2RX7 - purinergic receptor p2x, ligand-gated ion channel, 7, NLRP3 - nlr family, pyrin domain containing 3, CASP5 - caspase 5, apoptosis-related cysteine peptidase, CASP1 - caspase 1, apoptosis-related cysteine peptidase, NOD2 - nucleotide-binding oligomerization domain containing 2, IFNG - interferon, gamma, CCL3 - chemokine (c-c mo…
GO:0033138	positive regulation of peptidyl-serine phosphorylation	1e-05	0.000382	3.39	11488	59	918	16	4.71976	[VEGFA - vascular endothelial growth factor a, CSF3 - colony stimulating factor 3 (granulocyte), RIPK2 - receptor-interacting serine-threonine kinase 2, CDC42 - cell division cycle 42, SNCA - synuclein, alpha (non a4 component of amyloid precursor), CD44 - cd44 molecule (indian blood group), PPP1R15A - protein phosphatase 1, regulatory subunit 15a, OSM - oncostatin m, TNF - tumor necrosis factor,…
GO:0001816	cytokine production	1e-05	0.000383	3.39	11488	59	918	16	4.71976	[MR1 - major histocompatibility complex, class i-related, CCM2L - cerebral cavernous malformation 2-like, PTAFR - platelet-activating factor receptor, BATF - basic leucine zipper transcription factor, atf-like, IL1B - interleukin 1, beta, SLC11A1 - solute carrier family 11 (proton-coupled divalent metal ion transporter), member 1, IRF7 - interferon regulatory factor 7, IDO1 - indoleamine 2,3-diox…
GO:0045429	positive regulation of nitric oxide biosynthetic process	1.06e-05	0.000401	4.59	11488	30	918	11	2.39651	[P2RX4 - purinergic receptor p2x, ligand-gated ion channel, 4, ICAM1 - intercellular adhesion molecule 1, TNF - tumor necrosis factor, PTK2B - protein tyrosine kinase 2 beta, EDN1 - endothelin 1, PTGS2 - prostaglandin-endoperoxide synthase 2 (prostaglandin g/h synthase and cyclooxygenase), ASS1 - argininosuccinate synthase 1, IL1B - interleukin 1, beta, IL6 - interleukin 6 (interferon, beta 2), T…
GO:0032722	positive regulation of chemokine production	1.06e-05	0.000401	3.97	11488	41	918	13	3.27456	[FFAR2 - free fatty acid receptor 2, RIPK2 - receptor-interacting serine-threonine kinase 2, ADAM17 - adam metallopeptidase domain 17, IL1B - interleukin 1, beta, TICAM1 - toll-like receptor adaptor molecule 1, IL1A - interleukin 1, alpha, HAVCR2 - hepatitis a virus cellular receptor 2, EGR1 - early growth response 1, TNF - tumor necrosis factor, HMOX1 - heme oxygenase (decycling) 1, IL6 - interl…
GO:1904407	positive regulation of nitric oxide metabolic process	1.06e-05	0.000402	4.59	11488	30	918	11	2.39651	[P2RX4 - purinergic receptor p2x, ligand-gated ion channel, 4, ICAM1 - intercellular adhesion molecule 1, TNF - tumor necrosis factor, PTK2B - protein tyrosine kinase 2 beta, EDN1 - endothelin 1, PTGS2 - prostaglandin-endoperoxide synthase 2 (prostaglandin g/h synthase and cyclooxygenase), ASS1 - argininosuccinate synthase 1, IL1B - interleukin 1, beta, IL6 - interleukin 6 (interferon, beta 2), T…
GO:1902930	regulation of alcohol biosynthetic process	1.09e-05	0.00041	5.01	11488	25	918	10	1.99601	[CYP27B1 - cytochrome p450, family 27, subfamily b, polypeptide 1, TNF - tumor necrosis factor, PTK2B - protein tyrosine kinase 2 beta, PTAFR - platelet-activating factor receptor, SREBF1 - sterol regulatory element binding transcription factor 1, SNCA - synuclein, alpha (non a4 component of amyloid precursor), NFKB1 - nuclear factor of kappa light polypeptide gene enhancer in b-cells 1, IL1B - i…
GO:0032729	positive regulation of interferon-gamma production	1.1e-05	0.000413	3.73	11488	47	918	14	3.75335	[ZP3 - zona pellucida glycoprotein 3 (sperm receptor), IRF8 - interferon regulatory factor 8, RIPK2 - receptor-interacting serine-threonine kinase 2, EBI3 - epstein-barr virus induced 3, IL1B - interleukin 1, beta, IL12B - interleukin 12b (natural killer cell stimulatory factor 2, cytotoxic lymphocyte maturation factor 2, p40), HAVCR2 - hepatitis a virus cellular receptor 2, IL23A - interleukin 2…
GO:0032693	negative regulation of interleukin-10 production	1.13e-05	0.000421	7.3	11488	12	918	7	0.958904	[IL23A - interleukin 23, alpha subunit p19, TNFRSF9 - tumor necrosis factor receptor superfamily, member 9, IDO1 - indoleamine 2,3-dioxygenase 1, PRG2 - proteoglycan 2, bone marrow (natural killer cell activator, eosinophil granule major basic protein), CD274 - cd274 molecule, IL12B - interleukin 12b (natural killer cell stimulatory factor 2, cytotoxic lymphocyte maturation factor 2, p40), DLL1 -…
GO:0045073	regulation of chemokine biosynthetic process	1.13e-05	0.000422	7.3	11488	12	918	7	0.958904	[EGR1 - early growth response 1, TNF - tumor necrosis factor, HMOX1 - heme oxygenase (decycling) 1, IL1B - interleukin 1, beta, IL6 - interleukin 6 (interferon, beta 2), TICAM1 - toll-like receptor adaptor molecule 1, IFNG - interferon, gamma]
GO:0002825	regulation of T-helper 1 type immune response	1.16e-05	0.000433	6.26	11488	16	918	8	1.27796	[IL23A - interleukin 23, alpha subunit p19, SLC11A1 - solute carrier family 11 (proton-coupled divalent metal ion transporter), member 1, CCL19 - chemokine (c-c motif) ligand 19, IL27 - interleukin 27, RIPK2 - receptor-interacting serine-threonine kinase 2, IL12B - interleukin 12b (natural killer cell stimulatory factor 2, cytotoxic lymphocyte maturation factor 2, p40), CD80 - cd80 molecule, HAVC…
GO:0009267	cellular response to starvation	1.23e-05	0.000458	2.8	11488	94	918	21	7.5	[ZC3H12A - zinc finger ccch-type containing 12a, RALB - v-ral simian leukemia viral oncogene homolog b, GBA - glucosidase, beta, acid, ATG7 - autophagy related 7, JUN - jun proto-oncogene, CDKN1A - cyclin-dependent kinase inhibitor 1a (p21, cip1), DAP - death-associated protein, RRAGD - ras-related gtp binding d, RRAGC - ras-related gtp binding c, CPEB4 - cytoplasmic polyadenylation element bindi…
GO:0051453	regulation of intracellular pH	1.27e-05	0.000469	3.34	11488	60	918	16	4.79042	[ATP6V1E1 - atpase, h+ transporting, lysosomal 31kda, v1 subunit e1, ATP6V1G1 - atpase, h+ transporting, lysosomal 13kda, v1 subunit g1, ATP6V1F - atpase, h+ transporting, lysosomal 14kda, v1 subunit f, RAB7A - rab7a, member ras oncogene family, ATP6V1A - atpase, h+ transporting, lysosomal 70kda, v1 subunit a, ATP6V1D - atpase, h+ transporting, lysosomal 34kda, v1 subunit d, RAB20 - rab20, member…
GO:0019216	regulation of lipid metabolic process	1.27e-05	0.000471	2.17	11488	196	918	34	15.6682	[PRKAG2 - protein kinase, amp-activated, gamma 2 non-catalytic subunit, TRIB3 - tribbles homolog 3 (drosophila), CCR7 - chemokine (c-c motif) receptor 7, SNCA - synuclein, alpha (non a4 component of amyloid precursor), CDC42 - cell division cycle 42, NSMAF - neutral sphingomyelinase (n-smase) activation associated factor, PSAP - prosaposin, EGR1 - early growth response 1, LDLR - low density lipop…
GO:1903725	regulation of phospholipid metabolic process	1.42e-05	0.000522	3.87	11488	42	918	13	3.35917	[CCL19 - chemokine (c-c motif) ligand 19, CCR7 - chemokine (c-c motif) receptor 7, ZP3 - zona pellucida glycoprotein 3 (sperm receptor), CDC42 - cell division cycle 42, ARF1 - adp-ribosylation factor 1, LDLR - low density lipoprotein receptor, LYN - v-yes-1 yamaguchi sarcoma viral related oncogene homolog, PTK2B - protein tyrosine kinase 2 beta, SRC - v-src avian sarcoma (schmidt-ruppin a-2) vira…
GO:0031669	cellular response to nutrient levels	1.42e-05	0.000523	2.57	11488	117	918	24	9.33852	[RALB - v-ral simian leukemia viral oncogene homolog b, ICAM1 - intercellular adhesion molecule 1, ZC3H12A - zinc finger ccch-type containing 12a, GBA - glucosidase, beta, acid, ATG7 - autophagy related 7, JUN - jun proto-oncogene, CDKN1A - cyclin-dependent kinase inhibitor 1a (p21, cip1), DAP - death-associated protein, RRAGD - ras-related gtp binding d, CPEB4 - cytoplasmic polyadenylation eleme…
GO:0007162	negative regulation of cell adhesion	1.42e-05	0.000523	2.33	11488	156	918	29	12.4464	[NFKBID - nuclear factor of kappa light polypeptide gene enhancer in b-cells inhibitor, delta, CD274 - cd274 molecule, SDC4 - syndecan 4, IDO1 - indoleamine 2,3-dioxygenase 1, RDX - radixin, ARHGDIA - rho gdp dissociation inhibitor (gdi) alpha, LGALS1 - lectin, galactoside-binding, soluble, 1, LGALS3 - lectin, galactoside-binding, soluble, 3, CYP1B1 - cytochrome p450, family 1, subfamily b, polyp…
GO:0022408	negative regulation of cell-cell adhesion	1.46e-05	0.000535	2.77	11488	95	918	21	7.58123	[CEACAM1 - carcinoembryonic antigen-related cell adhesion molecule 1 (biliary glycoprotein), CCM2L - cerebral cavernous malformation 2-like, C1QTNF1 - c1q and tumor necrosis factor related protein 1, TNFRSF14 - tumor necrosis factor receptor superfamily, member 14, NFKBID - nuclear factor of kappa light polypeptide gene enhancer in b-cells inhibitor, delta, IL1RN - interleukin 1 receptor antagoni…
GO:0007155	cell adhesion	1.49e-05	0.000544	1.5	11488	850	918	102	68	[MICB - mhc class i polypeptide-related sequence b, SIRPA - signal-regulatory protein alpha, EMR1 - egf-like module containing, mucin-like, hormone receptor-like 1, CDC42 - cell division cycle 42, EBI3 - epstein-barr virus induced 3, SPP1 - secreted phosphoprotein 1, IL12B - interleukin 12b (natural killer cell stimulatory factor 2, cytotoxic lymphocyte maturation factor 2, p40), SDCBP - syndecan…
GO:0050716	positive regulation of interleukin-1 secretion	1.56e-05	0.000564	5.36	11488	21	918	9	1.6791	[CCL19 - chemokine (c-c motif) ligand 19, GSDMD - gasdermin d, P2RX7 - purinergic receptor p2x, ligand-gated ion channel, 7, NLRP3 - nlr family, pyrin domain containing 3, CASP5 - caspase 5, apoptosis-related cysteine peptidase, NOD2 - nucleotide-binding oligomerization domain containing 2, CASP1 - caspase 1, apoptosis-related cysteine peptidase, IFNG - interferon, gamma, CCL3 - chemokine (c-c mo…
GO:0010574	regulation of vascular endothelial growth factor production	1.56e-05	0.000566	5.36	11488	21	918	9	1.6791	[C3AR1 - complement component 3a receptor 1, C3 - complement component 3, PTGS2 - prostaglandin-endoperoxide synthase 2 (prostaglandin g/h synthase and cyclooxygenase), CYP1B1 - cytochrome p450, family 1, subfamily b, polypeptide 1, CCL2 - chemokine (c-c motif) ligand 2, IL1B - interleukin 1, beta, IL6 - interleukin 6 (interferon, beta 2), IL1A - interleukin 1, alpha, HIF1A - hypoxia inducible fa…
GO:0051222	positive regulation of protein transport	1.6e-05	0.000578	1.86	11488	330	918	49	26.3441	[CDC42 - cell division cycle 42, IL12B - interleukin 12b (natural killer cell stimulatory factor 2, cytotoxic lymphocyte maturation factor 2, p40), CD274 - cd274 molecule, IL23A - interleukin 23, alpha subunit p19, ZBTB17 - zinc finger and btb domain containing 17, CD58 - cd58 molecule, CASP5 - caspase 5, apoptosis-related cysteine peptidase, KCNN4 - potassium intermediate/small conductance calci…
GO:1901652	response to peptide	1.61e-05	0.000579	2.1	11488	215	918	36	17.1429	[TRIB3 - tribbles homolog 3 (drosophila), ATP2A2 - atpase, ca++ transporting, cardiac muscle, slow twitch 2, STAT1 - signal transducer and activator of transcription 1, 91kda, RHOQ - ras homolog family member q, EGR1 - early growth response 1, RELA - v-rel avian reticuloendotheliosis viral oncogene homolog a, BTG2 - btg family, member 2, LYN - v-yes-1 yamaguchi sarcoma viral related oncogene homo…
GO:0042110	T cell activation	1.62e-05	0.00058	2.31	11488	157	918	29	12.5541	[MICB - mhc class i polypeptide-related sequence b, ICAM1 - intercellular adhesion molecule 1, CLEC4E - c-type lectin domain family 4, member e, CLEC4D - c-type lectin domain family 4, member d, BATF - basic leucine zipper transcription factor, atf-like, EBI3 - epstein-barr virus induced 3, ADAM17 - adam metallopeptidase domain 17, IL12B - interleukin 12b (natural killer cell stimulatory factor 2…
GO:0070489	T cell aggregation	1.62e-05	0.000581	2.31	11488	157	918	29	12.5541	[MICB - mhc class i polypeptide-related sequence b, ICAM1 - intercellular adhesion molecule 1, CLEC4D - c-type lectin domain family 4, member d, CLEC4E - c-type lectin domain family 4, member e, BATF - basic leucine zipper transcription factor, atf-like, EBI3 - epstein-barr virus induced 3, ADAM17 - adam metallopeptidase domain 17, IL12B - interleukin 12b (natural killer cell stimulatory factor 2…
GO:0060627	regulation of vesicle-mediated transport	1.63e-05	0.000583	1.9	11488	303	918	46	24.2105	[RALB - v-ral simian leukemia viral oncogene homolog b, FLOT1 - flotillin 1, VPS18 - vacuolar protein sorting 18 homolog (s. cerevisiae), ATP2A2 - atpase, ca++ transporting, cardiac muscle, slow twitch 2, PTAFR - platelet-activating factor receptor, RAB21 - rab21, member ras oncogene family, SNCA - synuclein, alpha (non a4 component of amyloid precursor), SDCBP - syndecan binding protein (synteni…
GO:1903727	positive regulation of phospholipid metabolic process	1.64e-05	0.000584	4.81	11488	26	918	10	2.079	[CCL19 - chemokine (c-c motif) ligand 19, CCR7 - chemokine (c-c motif) receptor 7, LYN - v-yes-1 yamaguchi sarcoma viral related oncogene homolog, ZP3 - zona pellucida glycoprotein 3 (sperm receptor), PTK2B - protein tyrosine kinase 2 beta, SRC - v-src avian sarcoma (schmidt-ruppin a-2) viral oncogene homolog, PRKCD - protein kinase c, delta, CDC42 - cell division cycle 42, FGR - feline gardner-r…
GO:0034405	response to fluid shear stress	1.64e-05	0.000585	4.81	11488	26	918	10	2.079	[P2RX4 - purinergic receptor p2x, ligand-gated ion channel, 4, NFE2L2 - nuclear factor (erythroid-derived 2)-like 2, P2RX7 - purinergic receptor p2x, ligand-gated ion channel, 7, CA2 - carbonic anhydrase ii, PTK2B - protein tyrosine kinase 2 beta, SRC - v-src avian sarcoma (schmidt-ruppin a-2) viral oncogene homolog, CSF2 - colony stimulating factor 2 (granulocyte-macrophage), PTGS2 - prostagland…
GO:0097193	intrinsic apoptotic signaling pathway	1.65e-05	0.000585	2.55	11488	118	918	24	9.41176	[BOK - bcl2-related ovarian killer, TRIB3 - tribbles homolog 3 (drosophila), DDIT4 - dna-damage-inducible transcript 4, ZNF622 - zinc finger protein 622, CDKN1A - cyclin-dependent kinase inhibitor 1a (p21, cip1), PPP1R15A - protein phosphatase 1, regulatory subunit 15a, E2F2 - e2f transcription factor 2, TNF - tumor necrosis factor, BCL3 - b-cell cll/lymphoma 3, IKBKE - inhibitor of kappa light p…
GO:0046514	ceramide catabolic process	1.74e-05	0.000606	8.34	11488	9	918	6	0.719424	[NEU1 - sialidase 1 (lysosomal sialidase), GALC - galactosylceramidase, GBA - glucosidase, beta, acid, GBA3 - glucosidase, beta, acid 3, GM2A - gm2 ganglioside activator, NEU4 - sialidase 4]
GO:0046479	glycosphingolipid catabolic process	1.74e-05	0.000607	8.34	11488	9	918	6	0.719424	[NEU1 - sialidase 1 (lysosomal sialidase), GALC - galactosylceramidase, GBA - glucosidase, beta, acid, GBA3 - glucosidase, beta, acid 3, GM2A - gm2 ganglioside activator, NEU4 - sialidase 4]
GO:0019377	glycolipid catabolic process	1.74e-05	0.000609	8.34	11488	9	918	6	0.719424	[NEU1 - sialidase 1 (lysosomal sialidase), GALC - galactosylceramidase, GBA - glucosidase, beta, acid, GBA3 - glucosidase, beta, acid 3, GM2A - gm2 ganglioside activator, NEU4 - sialidase 4]
GO:0006048	UDP-N-acetylglucosamine biosynthetic process	1.74e-05	0.00061	8.34	11488	9	918	6	0.719424	[PGM3 - phosphoglucomutase 3, AMDHD2 - amidohydrolase domain containing 2, GNPDA1 - glucosamine-6-phosphate deaminase 1, NAGK - n-acetylglucosamine kinase, GNPNAT1 - glucosamine-phosphate n-acetyltransferase 1, UAP1 - udp-n-acteylglucosamine pyrophosphorylase 1]
GO:0070665	positive regulation of leukocyte proliferation	1.74e-05	0.000611	2.74	11488	96	918	21	7.66423	[CCL19 - chemokine (c-c motif) ligand 19, ZP3 - zona pellucida glycoprotein 3 (sperm receptor), RIPK2 - receptor-interacting serine-threonine kinase 2, CDKN1A - cyclin-dependent kinase inhibitor 1a (p21, cip1), EBI3 - epstein-barr virus induced 3, IL1B - interleukin 1, beta, CD40 - cd40 molecule, tnf receptor superfamily member 5, IL12B - interleukin 12b (natural killer cell stimulatory factor 2,…
GO:0022610	biological adhesion	1.73e-05	0.000612	1.5	11488	853	918	102	68	[MICB - mhc class i polypeptide-related sequence b, SIRPA - signal-regulatory protein alpha, EMR1 - egf-like module containing, mucin-like, hormone receptor-like 1, CDC42 - cell division cycle 42, EBI3 - epstein-barr virus induced 3, SPP1 - secreted phosphoprotein 1, IL12B - interleukin 12b (natural killer cell stimulatory factor 2, cytotoxic lymphocyte maturation factor 2, p40), SDCBP - syndecan…
GO:0032649	regulation of interferon-gamma production	1.73e-05	0.000612	3.13	11488	68	918	17	5.43131	[ZC3H12A - zinc finger ccch-type containing 12a, CCR7 - chemokine (c-c motif) receptor 7, IRF8 - interferon regulatory factor 8, ZP3 - zona pellucida glycoprotein 3 (sperm receptor), RIPK2 - receptor-interacting serine-threonine kinase 2, EBI3 - epstein-barr virus induced 3, IL1B - interleukin 1, beta, CD274 - cd274 molecule, IL12B - interleukin 12b (natural killer cell stimulatory factor 2, cyto…
GO:0045080	positive regulation of chemokine biosynthetic process	1.74e-05	0.000612	8.34	11488	9	918	6	0.719424	[EGR1 - early growth response 1, TNF - tumor necrosis factor, HMOX1 - heme oxygenase (decycling) 1, IL1B - interleukin 1, beta, TICAM1 - toll-like receptor adaptor molecule 1, IFNG - interferon, gamma]
GO:1901654	response to ketone	1.8e-05	0.000619	2.59	11488	111	918	23	8.88031	[GBA - glucosidase, beta, acid, CCL19 - chemokine (c-c motif) ligand 19, CCR7 - chemokine (c-c motif) receptor 7, PTAFR - platelet-activating factor receptor, GNG2 - guanine nucleotide binding protein (g protein), gamma 2, CDKN1A - cyclin-dependent kinase inhibitor 1a (p21, cip1), GJB2 - gap junction protein, beta 2, 26kda, CCL2 - chemokine (c-c motif) ligand 2, ASS1 - argininosuccinate synthase …
GO:1903428	positive regulation of reactive oxygen species biosynthetic process	1.79e-05	0.00062	4.06	11488	37	918	12	2.95567	[P2RX4 - purinergic receptor p2x, ligand-gated ion channel, 4, ICAM1 - intercellular adhesion molecule 1, TNF - tumor necrosis factor, PTK2B - protein tyrosine kinase 2 beta, EDN1 - endothelin 1, PTGS2 - prostaglandin-endoperoxide synthase 2 (prostaglandin g/h synthase and cyclooxygenase), ASS1 - argininosuccinate synthase 1, IL1B - interleukin 1, beta, IL6 - interleukin 6 (interferon, beta 2), C…
GO:0002478	antigen processing and presentation of exogenous peptide antigen	1.8e-05	0.00062	2.43	11488	134	918	26	10.6996	[NCF2 - neutrophil cytosolic factor 2, NCF4 - neutrophil cytosolic factor 4, 40kda, PSME2 - proteasome (prosome, macropain) activator subunit 2 (pa28 beta), SEC13 - sec13 homolog (s. cerevisiae), CANX - calnexin, SEC24D - sec24 family, member d (s. cerevisiae), IFI30 - interferon, gamma-inducible protein 30, HLA-DRA - major histocompatibility complex, class ii, dr alpha, TAP2 - transporter 2, atp…
GO:1903708	positive regulation of hemopoiesis	1.91e-05	0.000658	2.52	11488	119	918	24	9.52381	[ID2 - inhibitor of dna binding 2, dominant negative helix-loop-helix protein, CCL19 - chemokine (c-c motif) ligand 19, CSF3 - colony stimulating factor 3 (granulocyte), JUN - jun proto-oncogene, CD83 - cd83 molecule, TRIB1 - tribbles homolog 1 (drosophila), RIPK2 - receptor-interacting serine-threonine kinase 2, MMP14 - matrix metallopeptidase 14 (membrane-inserted), CCR1 - chemokine (c-c motif)…
GO:0030149	sphingolipid catabolic process	2.04e-05	0.000699	5.89	11488	17	918	8	1.35823	[NEU1 - sialidase 1 (lysosomal sialidase), GALC - galactosylceramidase, GBA - glucosidase, beta, acid, GBA3 - glucosidase, beta, acid 3, GM2A - gm2 ganglioside activator, SPHK1 - sphingosine kinase 1, SMPD1 - sphingomyelin phosphodiesterase 1, acid lysosomal, NEU4 - sialidase 4]
GO:0014074	response to purine-containing compound	2.05e-05	0.000701	2.71	11488	97	918	21	7.74908	[P2RX4 - purinergic receptor p2x, ligand-gated ion channel, 4, P2RX7 - purinergic receptor p2x, ligand-gated ion channel, 7, AQP9 - aquaporin 9, PTAFR - platelet-activating factor receptor, JUN - jun proto-oncogene, STAT1 - signal transducer and activator of transcription 1, 91kda, JUNB - jun b proto-oncogene, CCL2 - chemokine (c-c motif) ligand 2, ASS1 - argininosuccinate synthase 1, IL1B - inte…
GO:0071593	lymphocyte aggregation	2.07e-05	0.000707	2.28	11488	159	918	29	12.7193	[MICB - mhc class i polypeptide-related sequence b, ICAM1 - intercellular adhesion molecule 1, CLEC4E - c-type lectin domain family 4, member e, CLEC4D - c-type lectin domain family 4, member d, BATF - basic leucine zipper transcription factor, atf-like, EBI3 - epstein-barr virus induced 3, ADAM17 - adam metallopeptidase domain 17, IL12B - interleukin 12b (natural killer cell stimulatory factor 2…
GO:0042990	regulation of transcription factor import into nucleus	2.13e-05	0.000725	3.08	11488	69	918	17	5.51948	[ZC3H12A - zinc finger ccch-type containing 12a, CCL19 - chemokine (c-c motif) ligand 19, CSF3 - colony stimulating factor 3 (granulocyte), NFKBIA - nuclear factor of kappa light polypeptide gene enhancer in b-cells inhibitor, alpha, LITAF - lipopolysaccharide-induced tnf factor, SPHK1 - sphingosine kinase 1, IL1B - interleukin 1, beta, IL12B - interleukin 12b (natural killer cell stimulatory fac…
GO:0032653	regulation of interleukin-10 production	2.15e-05	0.00073	4.3	11488	32	918	11	2.55814	[IL23A - interleukin 23, alpha subunit p19, TNFRSF9 - tumor necrosis factor receptor superfamily, member 9, BCL3 - b-cell cll/lymphoma 3, FCER1G - fc fragment of ige, high affinity i, receptor for; gamma polypeptide, IDO1 - indoleamine 2,3-dioxygenase 1, CD83 - cd83 molecule, PRG2 - proteoglycan 2, bone marrow (natural killer cell activator, eosinophil granule major basic protein), NOD2 - nucleot…
GO:0045639	positive regulation of myeloid cell differentiation	2.22e-05	0.000752	3.35	11488	56	918	15	4.47761	[ID2 - inhibitor of dna binding 2, dominant negative helix-loop-helix protein, CSF3 - colony stimulating factor 3 (granulocyte), TRIB1 - tribbles homolog 1 (drosophila), JUN - jun proto-oncogene, IL12B - interleukin 12b (natural killer cell stimulatory factor 2, cytotoxic lymphocyte maturation factor 2, p40), CCR1 - chemokine (c-c motif) receptor 1, ACVR1B - activin a receptor, type ib, IL23A - i…
GO:0035994	response to muscle stretch	2.27e-05	0.000763	6.74	11488	13	918	7	1.03858	[RELA - v-rel avian reticuloendotheliosis viral oncogene homolog a, FOS - fbj murine osteosarcoma viral oncogene homolog, EDN1 - endothelin 1, JUN - jun proto-oncogene, NFKBIA - nuclear factor of kappa light polypeptide gene enhancer in b-cells inhibitor, alpha, NFKB1 - nuclear factor of kappa light polypeptide gene enhancer in b-cells 1, ANKRD1 - ankyrin repeat domain 1 (cardiac muscle)]
GO:0031348	negative regulation of defense response	2.26e-05	0.000764	2.62	11488	105	918	22	8.39695	[MICB - mhc class i polypeptide-related sequence b, ZC3H12A - zinc finger ccch-type containing 12a, GBA - glucosidase, beta, acid, DHX58 - dexh (asp-glu-x-his) box polypeptide 58, CEACAM1 - carcinoembryonic antigen-related cell adhesion molecule 1 (biliary glycoprotein), SOCS3 - suppressor of cytokine signaling 3, SERPINB9 - serpin peptidase inhibitor, clade b (ovalbumin), member 9, TRAFD1 - traf…
GO:0006047	UDP-N-acetylglucosamine metabolic process	2.27e-05	0.000765	6.74	11488	13	918	7	1.03858	[MGAT1 - mannosyl (alpha-1,3-)-glycoprotein beta-1,2-n-acetylglucosaminyltransferase, AMDHD2 - amidohydrolase domain containing 2, PGM3 - phosphoglucomutase 3, GNPDA1 - glucosamine-6-phosphate deaminase 1, NAGK - n-acetylglucosamine kinase, GNPNAT1 - glucosamine-phosphate n-acetyltransferase 1, UAP1 - udp-n-acteylglucosamine pyrophosphorylase 1]
GO:0051173	positive regulation of nitrogen compound metabolic process	2.37e-05	0.000793	1.41	11488	1166	918	131	92.9078	[ELL - elongation factor rna polymerase ii, NDN - necdin, melanoma antigen (mage) family member, PLAC8 - placenta-specific 8, CDC42 - cell division cycle 42, CXCL9 - chemokine (c-x-c motif) ligand 9, ABCA1 - atp-binding cassette, sub-family a (abc1), member 1, TICAM1 - toll-like receptor adaptor molecule 1, RELA - v-rel avian reticuloendotheliosis viral oncogene homolog a, OSM - oncostatin m, ZBT…
GO:0070374	positive regulation of ERK1 and ERK2 cascade	2.43e-05	0.000808	2.55	11488	113	918	23	9.01961	[ICAM1 - intercellular adhesion molecule 1, CCL19 - chemokine (c-c motif) ligand 19, CCR7 - chemokine (c-c motif) receptor 7, CCL3L3 - chemokine (c-c motif) ligand 3-like 3, JUN - jun proto-oncogene, RIPK2 - receptor-interacting serine-threonine kinase 2, CCL8 - chemokine (c-c motif) ligand 8, CD44 - cd44 molecule (indian blood group), CCL2 - chemokine (c-c motif) ligand 2, CCR1 - chemokine (c-c …
GO:0032731	positive regulation of interleukin-1 beta production	2.42e-05	0.000809	4.63	11488	27	918	10	2.15983	[EGR1 - early growth response 1, CCL19 - chemokine (c-c motif) ligand 19, GSDMD - gasdermin d, P2RX7 - purinergic receptor p2x, ligand-gated ion channel, 7, NLRP3 - nlr family, pyrin domain containing 3, CASP5 - caspase 5, apoptosis-related cysteine peptidase, NOD2 - nucleotide-binding oligomerization domain containing 2, CASP1 - caspase 1, apoptosis-related cysteine peptidase, CCL3 - chemokine (…
GO:0034121	regulation of toll-like receptor signaling pathway	2.43e-05	0.000809	3.95	11488	38	918	12	3.03797	[RSAD2 - radical s-adenosyl methionine domain containing 2, FLOT1 - flotillin 1, IRF1 - interferon regulatory factor 1, LYN - v-yes-1 yamaguchi sarcoma viral related oncogene homolog, CD14 - cd14 molecule, IRF7 - interferon regulatory factor 7, TNFAIP3 - tumor necrosis factor, alpha-induced protein 3, IRAK3 - interleukin-1 receptor-associated kinase 3, WDFY1 - wd repeat and fyve domain containing…
GO:0002292	T cell differentiation involved in immune response	2.45e-05	0.000812	5.12	11488	22	918	9	1.75781	[SEMA4A - sema domain, immunoglobulin domain (ig), transmembrane domain (tm) and short cytoplasmic domain, (semaphorin) 4a, PTGER4 - prostaglandin e receptor 4 (subtype ep4), BCL3 - b-cell cll/lymphoma 3, CLEC4D - c-type lectin domain family 4, member d, CLEC4E - c-type lectin domain family 4, member e, FCER1G - fc fragment of ige, high affinity i, receptor for; gamma polypeptide, BATF - basic le…
GO:0006897	endocytosis	2.52e-05	0.000831	1.91	11488	281	918	43	22.5131	[SNCA - synuclein, alpha (non a4 component of amyloid precursor), CANX - calnexin, C9orf72 - chromosome 9 open reading frame 72, SCARF1 - scavenger receptor class f, member 1, DLL1 - delta-like 1 (drosophila), RIN2 - ras and rab interactor 2, SNX10 - sorting nexin 10, CLN3 - ceroid-lipofuscinosis, neuronal 3, SLC11A1 - solute carrier family 11 (proton-coupled divalent metal ion transporter), memb…
GO:0002429	immune response-activating cell surface receptor signaling pathway	2.51e-05	0.000832	2.03	11488	228	918	37	18.2266	[MICB - mhc class i polypeptide-related sequence b, FFAR2 - free fatty acid receptor 2, CLEC4E - c-type lectin domain family 4, member e, CLEC4D - c-type lectin domain family 4, member d, PSME2 - proteasome (prosome, macropain) activator subunit 2 (pa28 beta), CDC42 - cell division cycle 42, SPG21 - spastic paraplegia 21 (autosomal recessive, mast syndrome), RELA - v-rel avian reticuloendothelios…
GO:0050731	positive regulation of peptidyl-tyrosine phosphorylation	2.64e-05	0.00087	2.6	11488	106	918	22	8.46154	[ICAM1 - intercellular adhesion molecule 1, VEGFA - vascular endothelial growth factor a, CSF3 - colony stimulating factor 3 (granulocyte), SOCS3 - suppressor of cytokine signaling 3, UNC119 - unc-119 homolog (c. elegans), TNFRSF14 - tumor necrosis factor receptor superfamily, member 14, CSF2 - colony stimulating factor 2 (granulocyte-macrophage), RIPK2 - receptor-interacting serine-threonine kin…
GO:0072503	cellular divalent inorganic cation homeostasis	2.73e-05	0.000895	2.1	11488	203	918	34	16.1905	[MCOLN1 - mucolipin 1, CCR7 - chemokine (c-c motif) receptor 7, MICU1 - mitochondrial calcium uptake 1, ATP2A2 - atpase, ca++ transporting, cardiac muscle, slow twitch 2, NMB - neuromedin b, CCR1 - chemokine (c-c motif) receptor 1, CLN3 - ceroid-lipofuscinosis, neuronal 3, PTGER4 - prostaglandin e receptor 4 (subtype ep4), SLC11A1 - solute carrier family 11 (proton-coupled divalent metal ion tran…
GO:0044764	multi-organism cellular process	2.81e-05	0.000922	1.63	11488	538	918	70	42.9448	[MICB - mhc class i polypeptide-related sequence b, BNIP3L - bcl2/adenovirus e1b 19kda interacting protein 3-like, DHX58 - dexh (asp-glu-x-his) box polypeptide 58, CDC42 - cell division cycle 42, CXCL9 - chemokine (c-x-c motif) ligand 9, VPS37C - vacuolar protein sorting 37 homolog c (s. cerevisiae), TICAM1 - toll-like receptor adaptor molecule 1, IL12B - interleukin 12b (natural killer cell stim…
GO:0045859	regulation of protein kinase activity	2.89e-05	0.000946	1.65	11488	509	918	67	40.6061	[TRIB3 - tribbles homolog 3 (drosophila), MAP3K8 - mitogen-activated protein kinase kinase kinase 8, CDC42 - cell division cycle 42, SOCS1 - suppressor of cytokine signaling 1, IL12B - interleukin 12b (natural killer cell stimulatory factor 2, cytotoxic lymphocyte maturation factor 2, p40), SDC4 - syndecan 4, IL23A - interleukin 23, alpha subunit p19, SLC11A1 - solute carrier family 11 (proton-co…
GO:0032880	regulation of protein localization	2.95e-05	0.000963	1.54	11488	689	918	85	55.1948	[TNFRSF9 - tumor necrosis factor receptor superfamily, member 9, BNIP3L - bcl2/adenovirus e1b 19kda interacting protein 3-like, CDC42 - cell division cycle 42, SOCS1 - suppressor of cytokine signaling 1, RHOQ - ras homolog family member q, IL12B - interleukin 12b (natural killer cell stimulatory factor 2, cytotoxic lymphocyte maturation factor 2, p40), CD274 - cd274 molecule, IL23A - interleukin …
GO:0070542	response to fatty acid	3e-05	0.000972	4.17	11488	33	918	11	2.63789	[ZC3H12A - zinc finger ccch-type containing 12a, LDLR - low density lipoprotein receptor, FFAR2 - free fatty acid receptor 2, SRC - v-src avian sarcoma (schmidt-ruppin a-2) viral oncogene homolog, EDN1 - endothelin 1, PTAFR - platelet-activating factor receptor, SREBF1 - sterol regulatory element binding transcription factor 1, INSIG2 - insulin induced gene 2, PTGS2 - prostaglandin-endoperoxide s…
GO:0002763	positive regulation of myeloid leukocyte differentiation	3e-05	0.000974	4.17	11488	33	918	11	2.63789	[ID2 - inhibitor of dna binding 2, dominant negative helix-loop-helix protein, IL23A - interleukin 23, alpha subunit p19, TNF - tumor necrosis factor, FOS - fbj murine osteosarcoma viral oncogene homolog, CA2 - carbonic anhydrase ii, JUN - jun proto-oncogene, TRIB1 - tribbles homolog 1 (drosophila), KLF10 - kruppel-like factor 10, IL12B - interleukin 12b (natural killer cell stimulatory factor 2,…
GO:0032755	positive regulation of interleukin-6 production	3.08e-05	0.000995	3.44	11488	51	918	14	4.06977	[P2RX7 - purinergic receptor p2x, ligand-gated ion channel, 7, PTAFR - platelet-activating factor receptor, RIPK2 - receptor-interacting serine-threonine kinase 2, IL1B - interleukin 1, beta, TICAM1 - toll-like receptor adaptor molecule 1, IL1A - interleukin 1, alpha, TNF - tumor necrosis factor, FCER1G - fc fragment of ige, high affinity i, receptor for; gamma polypeptide, XBP1 - x-box binding p…
GO:0046683	response to organophosphorus	3.14e-05	0.00101	2.8	11488	85	918	19	6.78571	[P2RX4 - purinergic receptor p2x, ligand-gated ion channel, 4, P2RX7 - purinergic receptor p2x, ligand-gated ion channel, 7, AQP9 - aquaporin 9, PTAFR - platelet-activating factor receptor, JUN - jun proto-oncogene, STAT1 - signal transducer and activator of transcription 1, 91kda, JUNB - jun b proto-oncogene, ASS1 - argininosuccinate synthase 1, CCL2 - chemokine (c-c motif) ligand 2, IL1B - inte…
GO:0010557	positive regulation of macromolecule biosynthetic process	3.27e-05	0.00105	1.42	11488	1056	918	120	84.507	[ELL - elongation factor rna polymerase ii, NDN - necdin, melanoma antigen (mage) family member, PLAC8 - placenta-specific 8, CDC42 - cell division cycle 42, EBI3 - epstein-barr virus induced 3, IL12B - interleukin 12b (natural killer cell stimulatory factor 2, cytotoxic lymphocyte maturation factor 2, p40), TICAM1 - toll-like receptor adaptor molecule 1, RELA - v-rel avian reticuloendotheliosis …
GO:0046649	lymphocyte activation	3.5e-05	0.00112	1.96	11488	249	918	39	19.898	[MICB - mhc class i polypeptide-related sequence b, ICAM1 - intercellular adhesion molecule 1, CLEC4E - c-type lectin domain family 4, member e, CLEC4D - c-type lectin domain family 4, member d, BATF - basic leucine zipper transcription factor, atf-like, EBI3 - epstein-barr virus induced 3, ADAM17 - adam metallopeptidase domain 17, IL12B - interleukin 12b (natural killer cell stimulatory factor 2…
GO:0032946	positive regulation of mononuclear cell proliferation	3.56e-05	0.00114	2.69	11488	93	918	20	7.43494	[CCL19 - chemokine (c-c motif) ligand 19, ZP3 - zona pellucida glycoprotein 3 (sperm receptor), RIPK2 - receptor-interacting serine-threonine kinase 2, CDKN1A - cyclin-dependent kinase inhibitor 1a (p21, cip1), EBI3 - epstein-barr virus induced 3, IL1B - interleukin 1, beta, CD40 - cd40 molecule, tnf receptor superfamily member 5, CD274 - cd274 molecule, TICAM1 - toll-like receptor adaptor molecu…
GO:0050671	positive regulation of lymphocyte proliferation	3.56e-05	0.00114	2.69	11488	93	918	20	7.43494	[CCL19 - chemokine (c-c motif) ligand 19, ZP3 - zona pellucida glycoprotein 3 (sperm receptor), RIPK2 - receptor-interacting serine-threonine kinase 2, CDKN1A - cyclin-dependent kinase inhibitor 1a (p21, cip1), EBI3 - epstein-barr virus induced 3, IL1B - interleukin 1, beta, CD40 - cd40 molecule, tnf receptor superfamily member 5, IL12B - interleukin 12b (natural killer cell stimulatory factor 2,…
GO:1902105	regulation of leukocyte differentiation	3.66e-05	0.00117	2.18	11488	172	918	30	13.7615	[NFKBID - nuclear factor of kappa light polypeptide gene enhancer in b-cells inhibitor, delta, TRIB1 - tribbles homolog 1 (drosophila), CD83 - cd83 molecule, JUN - jun proto-oncogene, IL12B - interleukin 12b (natural killer cell stimulatory factor 2, cytotoxic lymphocyte maturation factor 2, p40), CCR1 - chemokine (c-c motif) receptor 1, IL23A - interleukin 23, alpha subunit p19, CA2 - carbonic a…
GO:0043372	positive regulation of CD4-positive, alpha-beta T cell differentiation	3.74e-05	0.00119	4.9	11488	23	918	9	1.83673	[IL23A - interleukin 23, alpha subunit p19, CCL19 - chemokine (c-c motif) ligand 19, NLRP3 - nlr family, pyrin domain containing 3, CD83 - cd83 molecule, RIPK2 - receptor-interacting serine-threonine kinase 2, IL6 - interleukin 6 (interferon, beta 2), IL12B - interleukin 12b (natural killer cell stimulatory factor 2, cytotoxic lymphocyte maturation factor 2, p40), CD80 - cd80 molecule, IFNG - int…
GO:0043901	negative regulation of multi-organism process	3.77e-05	0.0012	2.48	11488	116	918	23	9.27419	[MICB - mhc class i polypeptide-related sequence b, RSAD2 - radical s-adenosyl methionine domain containing 2, ZC3H12A - zinc finger ccch-type containing 12a, DHX58 - dexh (asp-glu-x-his) box polypeptide 58, TNIP1 - tnfaip3 interacting protein 1, ZFP36 - zfp36 ring finger protein, IRF8 - interferon regulatory factor 8, ZP3 - zona pellucida glycoprotein 3 (sperm receptor), JUN - jun proto-oncogene…
GO:0030162	regulation of proteolysis	3.8e-05	0.0012	1.65	11488	484	918	64	38.7879	[TRIB3 - tribbles homolog 3 (drosophila), BOK - bcl2-related ovarian killer, CSTB - cystatin b (stefin b), F12 - coagulation factor xii (hageman factor), SDCBP - syndecan binding protein (syntenin), SPINK1 - serine peptidase inhibitor, kazal type 1, PTK2B - protein tyrosine kinase 2 beta, CD59 - cd59 molecule, complement regulatory protein, XBP1 - x-box binding protein 1, CARD17 - caspase recruit…
GO:0046916	cellular transition metal ion homeostasis	3.9e-05	0.00123	3.37	11488	52	918	14	4.1543	[MT2A - metallothionein 2a, SLC31A2 - solute carrier family 31 (copper transporter), member 2, ARF1 - adp-ribosylation factor 1, LCN2 - lipocalin 2, SLC11A2 - solute carrier family 11 (proton-coupled divalent metal ion transporter), member 2, SLC11A1 - solute carrier family 11 (proton-coupled divalent metal ion transporter), member 1, HAMP - hepcidin antimicrobial peptide, SLC39A8 - solute carrie…
GO:0010951	negative regulation of endopeptidase activity	3.96e-05	0.00125	2.37	11488	132	918	25	10.5485	[CSTB - cystatin b (stefin b), CARD16 - caspase recruitment domain family, member 16, SNCA - synuclein, alpha (non a4 component of amyloid precursor), SPINK1 - serine peptidase inhibitor, kazal type 1, TNFSF14 - tumor necrosis factor (ligand) superfamily, member 14, CARD17 - caspase recruitment domain family, member 17, FNIP1 - folliculin interacting protein 1, VEGFA - vascular endothelial growth…
GO:0000302	response to reactive oxygen species	3.97e-05	0.00125	2.32	11488	140	918	26	11.2069	[CCR7 - chemokine (c-c motif) receptor 7, PLK3 - polo-like kinase 3, JUN - jun proto-oncogene, STAT1 - signal transducer and activator of transcription 1, 91kda, RELA - v-rel avian reticuloendotheliosis viral oncogene homolog a, NFE2L2 - nuclear factor (erythroid-derived 2)-like 2, ERO1L - ero1-like (s. cerevisiae), PTK2B - protein tyrosine kinase 2 beta, ADA - adenosine deaminase, CYP1B1 - cytoc…
GO:0019884	antigen processing and presentation of exogenous antigen	3.97e-05	0.00125	2.32	11488	140	918	26	11.2069	[NCF2 - neutrophil cytosolic factor 2, NCF4 - neutrophil cytosolic factor 4, 40kda, PSME2 - proteasome (prosome, macropain) activator subunit 2 (pa28 beta), SEC13 - sec13 homolog (s. cerevisiae), CANX - calnexin, SEC24D - sec24 family, member d (s. cerevisiae), IFI30 - interferon, gamma-inducible protein 30, HLA-DRA - major histocompatibility complex, class ii, dr alpha, TAP2 - transporter 2, atp…
GO:0044403	symbiosis, encompassing mutualism through parasitism	4.02e-05	0.00125	1.62	11488	534	918	69	42.5926	[MICB - mhc class i polypeptide-related sequence b, BNIP3L - bcl2/adenovirus e1b 19kda interacting protein 3-like, DHX58 - dexh (asp-glu-x-his) box polypeptide 58, CDC42 - cell division cycle 42, CXCL9 - chemokine (c-x-c motif) ligand 9, VPS37C - vacuolar protein sorting 37 homolog c (s. cerevisiae), TICAM1 - toll-like receptor adaptor molecule 1, IL12B - interleukin 12b (natural killer cell stim…
GO:0016032	viral process	4.02e-05	0.00126	1.62	11488	534	918	69	42.5926	[MICB - mhc class i polypeptide-related sequence b, BNIP3L - bcl2/adenovirus e1b 19kda interacting protein 3-like, DHX58 - dexh (asp-glu-x-his) box polypeptide 58, CDC42 - cell division cycle 42, CXCL9 - chemokine (c-x-c motif) ligand 9, VPS37C - vacuolar protein sorting 37 homolog c (s. cerevisiae), TICAM1 - toll-like receptor adaptor molecule 1, IL12B - interleukin 12b (natural killer cell stim…
GO:0070431	nucleotide-binding oligomerization domain containing 2 signaling pathway	4.05e-05	0.00126	12.51	11488	4	918	4	0.319744	[RELA - v-rel avian reticuloendotheliosis viral oncogene homolog a, NFKBIA - nuclear factor of kappa light polypeptide gene enhancer in b-cells inhibitor, alpha, RIPK2 - receptor-interacting serine-threonine kinase 2, NOD2 - nucleotide-binding oligomerization domain containing 2]
GO:0044712	single-organism catabolic process	4.18e-05	0.0013	1.66	11488	466	918	62	37.3494	[HSD17B14 - hydroxysteroid (17-beta) dehydrogenase 14, PNKD - paroxysmal nonkinesigenic dyskinesia, GBA3 - glucosidase, beta, acid 3, HSD17B4 - hydroxysteroid (17-beta) dehydrogenase 4, BCKDK - branched chain ketoacid dehydrogenase kinase, PLA2G7 - phospholipase a2, group vii (platelet-activating factor acetylhydrolase, plasma), AHCYL1 - adenosylhomocysteinase-like 1, IDO1 - indoleamine 2,3-dioxy…
GO:0032495	response to muramyl dipeptide	4.23e-05	0.00131	6.26	11488	14	918	7	1.11821	[RELA - v-rel avian reticuloendotheliosis viral oncogene homolog a, JAG1 - jagged 1, TNFAIP3 - tumor necrosis factor, alpha-induced protein 3, NFKBIA - nuclear factor of kappa light polypeptide gene enhancer in b-cells inhibitor, alpha, RIPK2 - receptor-interacting serine-threonine kinase 2, NOD2 - nucleotide-binding oligomerization domain containing 2, ERBB2IP - erbb2 interacting protein]
GO:0045428	regulation of nitric oxide biosynthetic process	4.31e-05	0.00133	3.75	11488	40	918	12	3.2	[P2RX4 - purinergic receptor p2x, ligand-gated ion channel, 4, ZC3H12A - zinc finger ccch-type containing 12a, ICAM1 - intercellular adhesion molecule 1, TNF - tumor necrosis factor, PTK2B - protein tyrosine kinase 2 beta, EDN1 - endothelin 1, PTGS2 - prostaglandin-endoperoxide synthase 2 (prostaglandin g/h synthase and cyclooxygenase), ASS1 - argininosuccinate synthase 1, IL1B - interleukin 1, b…
GO:0043433	negative regulation of sequence-specific DNA binding transcription factor activity	4.42e-05	0.00136	2.73	11488	87	918	19	6.95971	[ID2 - inhibitor of dna binding 2, dominant negative helix-loop-helix protein, ZC3H12A - zinc finger ccch-type containing 12a, BHLHE40 - basic helix-loop-helix family, member e40, NFKBID - nuclear factor of kappa light polypeptide gene enhancer in b-cells inhibitor, delta, TRIB1 - tribbles homolog 1 (drosophila), NFKBIA - nuclear factor of kappa light polypeptide gene enhancer in b-cells inhibito…
GO:0048660	regulation of smooth muscle cell proliferation	4.42e-05	0.00136	2.73	11488	87	918	19	6.95971	[ID2 - inhibitor of dna binding 2, dominant negative helix-loop-helix protein, PTAFR - platelet-activating factor receptor, TRIB1 - tribbles homolog 1 (drosophila), JUN - jun proto-oncogene, STAT1 - signal transducer and activator of transcription 1, 91kda, TGM2 - transglutaminase 2, IL12B - interleukin 12b (natural killer cell stimulatory factor 2, cytotoxic lymphocyte maturation factor 2, p40),…
GO:0045637	regulation of myeloid cell differentiation	4.51e-05	0.00139	2.35	11488	133	918	25	10.6383	[TRIB1 - tribbles homolog 1 (drosophila), JUN - jun proto-oncogene, IL12B - interleukin 12b (natural killer cell stimulatory factor 2, cytotoxic lymphocyte maturation factor 2, p40), CCR1 - chemokine (c-c motif) receptor 1, ACVR1B - activin a receptor, type ib, DLL1 - delta-like 1 (drosophila), IL23A - interleukin 23, alpha subunit p19, CA2 - carbonic anhydrase ii, JAG1 - jagged 1, LYN - v-yes-1 …
GO:0072507	divalent inorganic cation homeostasis	4.71e-05	0.00144	2.02	11488	217	918	35	17.3267	[MCOLN1 - mucolipin 1, CCR7 - chemokine (c-c motif) receptor 7, MICU1 - mitochondrial calcium uptake 1, ATP2A2 - atpase, ca++ transporting, cardiac muscle, slow twitch 2, NMB - neuromedin b, CCR1 - chemokine (c-c motif) receptor 1, CLN3 - ceroid-lipofuscinosis, neuronal 3, PTGER4 - prostaglandin e receptor 4 (subtype ep4), SLC11A1 - solute carrier family 11 (proton-coupled divalent metal ion tran…
GO:0044767	single-organism developmental process	4.87e-05	0.00149	1.23	11488	2697	918	265	215.447	[BOK - bcl2-related ovarian killer, ELL - elongation factor rna polymerase ii, NDN - necdin, melanoma antigen (mage) family member, PLAC8 - placenta-specific 8, HSD17B4 - hydroxysteroid (17-beta) dehydrogenase 4, SPRR1A - small proline-rich protein 1a, CREG1 - cellular repressor of e1a-stimulated genes 1, IER2 - immediate early response 2, SPP1 - secreted phosphoprotein 1, RELA - v-rel avian reti…
GO:1902107	positive regulation of leukocyte differentiation	4.91e-05	0.0015	2.63	11488	95	918	20	7.60456	[ID2 - inhibitor of dna binding 2, dominant negative helix-loop-helix protein, CCL19 - chemokine (c-c motif) ligand 19, CD83 - cd83 molecule, JUN - jun proto-oncogene, TRIB1 - tribbles homolog 1 (drosophila), RIPK2 - receptor-interacting serine-threonine kinase 2, MMP14 - matrix metallopeptidase 14 (membrane-inserted), CCR1 - chemokine (c-c motif) receptor 1, IL12B - interleukin 12b (natural kill…
GO:0043370	regulation of CD4-positive, alpha-beta T cell differentiation	4.96e-05	0.00151	4.32	11488	29	918	10	2.31481	[IL23A - interleukin 23, alpha subunit p19, CCL19 - chemokine (c-c motif) ligand 19, NLRP3 - nlr family, pyrin domain containing 3, IL27 - interleukin 27, CD83 - cd83 molecule, RIPK2 - receptor-interacting serine-threonine kinase 2, IL6 - interleukin 6 (interferon, beta 2), IL12B - interleukin 12b (natural killer cell stimulatory factor 2, cytotoxic lymphocyte maturation factor 2, p40), CD80 - cd…
GO:0045861	negative regulation of proteolysis	5.11e-05	0.00155	2.15	11488	175	918	30	13.9535	[CSTB - cystatin b (stefin b), CARD16 - caspase recruitment domain family, member 16, SNCA - synuclein, alpha (non a4 component of amyloid precursor), SDCBP - syndecan binding protein (syntenin), SPINK1 - serine peptidase inhibitor, kazal type 1, CLN3 - ceroid-lipofuscinosis, neuronal 3, CD59 - cd59 molecule, complement regulatory protein, TNFSF14 - tumor necrosis factor (ligand) superfamily, mem…
GO:0043549	regulation of kinase activity	5.12e-05	0.00155	1.6	11488	548	918	70	43.75	[TRIB3 - tribbles homolog 3 (drosophila), MAP3K8 - mitogen-activated protein kinase kinase kinase 8, CDC42 - cell division cycle 42, SOCS1 - suppressor of cytokine signaling 1, IL12B - interleukin 12b (natural killer cell stimulatory factor 2, cytotoxic lymphocyte maturation factor 2, p40), SDC4 - syndecan 4, IL23A - interleukin 23, alpha subunit p19, SLC11A1 - solute carrier family 11 (proton-co…
GO:0006874	cellular calcium ion homeostasis	5.14e-05	0.00155	2.09	11488	192	918	32	15.311	[MCOLN1 - mucolipin 1, MICU1 - mitochondrial calcium uptake 1, CCR7 - chemokine (c-c motif) receptor 7, ATP2A2 - atpase, ca++ transporting, cardiac muscle, slow twitch 2, NMB - neuromedin b, CCR1 - chemokine (c-c motif) receptor 1, PTGER4 - prostaglandin e receptor 4 (subtype ep4), CLN3 - ceroid-lipofuscinosis, neuronal 3, ERO1L - ero1-like (s. cerevisiae), PTGIR - prostaglandin i2 (prostacyclin)…
GO:0002706	regulation of lymphocyte mediated immunity	5.23e-05	0.00158	2.7	11488	88	918	19	7.03704	[RSAD2 - radical s-adenosyl methionine domain containing 2, LAMP1 - lysosomal-associated membrane protein 1, CEACAM1 - carcinoembryonic antigen-related cell adhesion molecule 1 (biliary glycoprotein), P2RX7 - purinergic receptor p2x, ligand-gated ion channel, 7, ZP3 - zona pellucida glycoprotein 3 (sperm receptor), SERPINB9 - serpin peptidase inhibitor, clade b (ovalbumin), member 9, CD40 - cd40 …
GO:0002366	leukocyte activation involved in immune response	5.29e-05	0.00159	2.55	11488	103	918	21	8.23529	[ICAM1 - intercellular adhesion molecule 1, S100A13 - s100 calcium binding protein a13, CLEC4D - c-type lectin domain family 4, member d, CLEC4E - c-type lectin domain family 4, member e, SBNO2 - strawberry notch homolog 2 (drosophila), BATF - basic leucine zipper transcription factor, atf-like, IL12B - interleukin 12b (natural killer cell stimulatory factor 2, cytotoxic lymphocyte maturation fac…
GO:0055074	calcium ion homeostasis	5.37e-05	0.00161	2.05	11488	201	918	33	16.0976	[MCOLN1 - mucolipin 1, CCR7 - chemokine (c-c motif) receptor 7, MICU1 - mitochondrial calcium uptake 1, ATP2A2 - atpase, ca++ transporting, cardiac muscle, slow twitch 2, NMB - neuromedin b, CCR1 - chemokine (c-c motif) receptor 1, CLN3 - ceroid-lipofuscinosis, neuronal 3, PTGER4 - prostaglandin e receptor 4 (subtype ep4), ERO1L - ero1-like (s. cerevisiae), PTK2B - protein tyrosine kinase 2 beta,…
GO:0032088	negative regulation of NF-kappaB transcription factor activity	5.39e-05	0.00162	3.46	11488	47	918	13	3.75723	[ZC3H12A - zinc finger ccch-type containing 12a, NFKBID - nuclear factor of kappa light polypeptide gene enhancer in b-cells inhibitor, delta, NFKBIA - nuclear factor of kappa light polypeptide gene enhancer in b-cells inhibitor, alpha, HAVCR2 - hepatitis a virus cellular receptor 2, DAP - death-associated protein, NLRP3 - nlr family, pyrin domain containing 3, TNFAIP3 - tumor necrosis factor, al…
GO:0090662	ATP hydrolysis coupled transmembrane transport	5.56e-05	0.00166	4.69	11488	24	918	9	1.91898	[ATP6V1E1 - atpase, h+ transporting, lysosomal 31kda, v1 subunit e1, ATP6V1H - atpase, h+ transporting, lysosomal 50/57kda, v1 subunit h, ATP6V1F - atpase, h+ transporting, lysosomal 14kda, v1 subunit f, ATP5G1 - atp synthase, h+ transporting, mitochondrial fo complex, subunit c1 (subunit 9), ATP6V0D1 - atpase, h+ transporting, lysosomal 38kda, v0 subunit d1, ATP6V0E1 - atpase, h+ transporting, l…
GO:0007204	positive regulation of cytosolic calcium ion concentration	5.56e-05	0.00166	2.48	11488	111	918	22	8.87097	[MCOLN1 - mucolipin 1, CCL19 - chemokine (c-c motif) ligand 19, CCR7 - chemokine (c-c motif) receptor 7, P2RX7 - purinergic receptor p2x, ligand-gated ion channel, 7, C1QTNF1 - c1q and tumor necrosis factor related protein 1, TGM2 - transglutaminase 2, NMB - neuromedin b, JPH2 - junctophilin 2, CCR1 - chemokine (c-c motif) receptor 1, CCL3 - chemokine (c-c motif) ligand 3, C3AR1 - complement comp…
GO:0002761	regulation of myeloid leukocyte differentiation	5.61e-05	0.00167	2.87	11488	74	918	17	5.92334	[ID2 - inhibitor of dna binding 2, dominant negative helix-loop-helix protein, CEACAM1 - carcinoembryonic antigen-related cell adhesion molecule 1 (biliary glycoprotein), JUN - jun proto-oncogene, TRIB1 - tribbles homolog 1 (drosophila), IL12B - interleukin 12b (natural killer cell stimulatory factor 2, cytotoxic lymphocyte maturation factor 2, p40), CCR1 - chemokine (c-c motif) receptor 1, CCL3 …
GO:2001236	regulation of extrinsic apoptotic signaling pathway	5.74e-05	0.0017	2.42	11488	119	918	23	9.50413	[ICAM1 - intercellular adhesion molecule 1, PEA15 - phosphoprotein enriched in astrocytes 15, STX4 - syntaxin 4, CSF2 - colony stimulating factor 2 (granulocyte-macrophage), G0S2 - g0/g1switch 2, IL1B - interleukin 1, beta, BID - bh3 interacting domain death agonist, IL1A - interleukin 1, alpha, DAPK1 - death-associated protein kinase 1, RELA - v-rel avian reticuloendotheliosis viral oncogene hom…
GO:0043086	negative regulation of catalytic activity	5.75e-05	0.0017	1.59	11488	550	918	70	44.0252	[TRIB3 - tribbles homolog 3 (drosophila), ELL - elongation factor rna polymerase ii, CSTB - cystatin b (stefin b), SOCS1 - suppressor of cytokine signaling 1, SPINK1 - serine peptidase inhibitor, kazal type 1, ANXA5 - annexin a5, TMED2 - transmembrane emp24 domain trafficking protein 2, RDX - radixin, MKKS - mckusick-kaufman syndrome, CARD17 - caspase recruitment domain family, member 17, PSMB2 -…
GO:0010466	negative regulation of peptidase activity	5.84e-05	0.00172	2.32	11488	135	918	25	10.7759	[CSTB - cystatin b (stefin b), CARD16 - caspase recruitment domain family, member 16, SNCA - synuclein, alpha (non a4 component of amyloid precursor), SPINK1 - serine peptidase inhibitor, kazal type 1, TNFSF14 - tumor necrosis factor (ligand) superfamily, member 14, CARD17 - caspase recruitment domain family, member 17, FNIP1 - folliculin interacting protein 1, VEGFA - vascular endothelial growth…
GO:0032844	regulation of homeostatic process	5.88e-05	0.00173	1.85	11488	291	918	43	23.2432	[MCOLN1 - mucolipin 1, CCR7 - chemokine (c-c motif) receptor 7, SCN1B - sodium channel, voltage-gated, type i, beta subunit, SNCA - synuclein, alpha (non a4 component of amyloid precursor), CXCL9 - chemokine (c-x-c motif) ligand 9, ADAM17 - adam metallopeptidase domain 17, SPP1 - secreted phosphoprotein 1, ACVR1B - activin a receptor, type ib, DLL1 - delta-like 1 (drosophila), LDLR - low density …
GO:0060558	regulation of calcidiol 1-monooxygenase activity	5.91e-05	0.00173	8.94	11488	7	918	5	0.559284	[CYP27B1 - cytochrome p450, family 27, subfamily b, polypeptide 1, TNF - tumor necrosis factor, NFKB1 - nuclear factor of kappa light polypeptide gene enhancer in b-cells 1, IL1B - interleukin 1, beta, IFNG - interferon, gamma]
GO:0002604	regulation of dendritic cell antigen processing and presentation	5.91e-05	0.00174	8.94	11488	7	918	5	0.559284	[SLC11A1 - solute carrier family 11 (proton-coupled divalent metal ion transporter), member 1, CCL19 - chemokine (c-c motif) ligand 19, CCR7 - chemokine (c-c motif) receptor 7, THBS1 - thrombospondin 1, NOD2 - nucleotide-binding oligomerization domain containing 2]
GO:0045597	positive regulation of cell differentiation	6.08e-05	0.00178	1.6	11488	541	918	69	43.125	[CD83 - cd83 molecule, CDC42 - cell division cycle 42, CXCL9 - chemokine (c-x-c motif) ligand 9, IL12B - interleukin 12b (natural killer cell stimulatory factor 2, cytotoxic lymphocyte maturation factor 2, p40), SDCBP - syndecan binding protein (syntenin), IL23A - interleukin 23, alpha subunit p19, RELA - v-rel avian reticuloendotheliosis viral oncogene homolog a, CTNNA1 - catenin (cadherin-assoc…
GO:0002263	cell activation involved in immune response	6.14e-05	0.00179	2.53	11488	104	918	21	8.3004	[ICAM1 - intercellular adhesion molecule 1, S100A13 - s100 calcium binding protein a13, CLEC4D - c-type lectin domain family 4, member d, CLEC4E - c-type lectin domain family 4, member e, SBNO2 - strawberry notch homolog 2 (drosophila), BATF - basic leucine zipper transcription factor, atf-like, TICAM1 - toll-like receptor adaptor molecule 1, IL12B - interleukin 12b (natural killer cell stimulato…
GO:2001233	regulation of apoptotic signaling pathway	6.38e-05	0.00186	1.84	11488	292	918	43	23.3696	[BOK - bcl2-related ovarian killer, ICAM1 - intercellular adhesion molecule 1, G0S2 - g0/g1switch 2, TFDP1 - transcription factor dp-1, RELA - v-rel avian reticuloendotheliosis viral oncogene homolog a, NFE2L2 - nuclear factor (erythroid-derived 2)-like 2, PLAGL2 - pleiomorphic adenoma gene-like 2, OSM - oncostatin m, CTNNA1 - catenin (cadherin-associated protein), alpha 1, 102kda, LTBR - lymphot…
GO:0032845	negative regulation of homeostatic process	7.23e-05	0.0021	2.64	11488	90	918	19	7.19697	[CCL19 - chemokine (c-c motif) ligand 19, MCOLN1 - mucolipin 1, P2RX7 - purinergic receptor p2x, ligand-gated ion channel, 7, CCR7 - chemokine (c-c motif) receptor 7, ZFP36 - zfp36 ring finger protein, JPH2 - junctophilin 2, CCL3 - chemokine (c-c motif) ligand 3, ERO1L - ero1-like (s. cerevisiae), FCER1G - fc fragment of ige, high affinity i, receptor for; gamma polypeptide, SRC - v-src avian sar…
GO:0070741	response to interleukin-6	7.39e-05	0.00214	5.84	11488	15	918	7	1.19863	[RELA - v-rel avian reticuloendotheliosis viral oncogene homolog a, HAMP - hepcidin antimicrobial peptide, SBNO2 - strawberry notch homolog 2 (drosophila), NFKB1 - nuclear factor of kappa light polypeptide gene enhancer in b-cells 1, CCL2 - chemokine (c-c motif) ligand 2, PID1 - phosphotyrosine interaction domain containing 1, CHI3L1 - chitinase 3-like 1 (cartilage glycoprotein-39)]
GO:0046634	regulation of alpha-beta T cell activation	7.66e-05	0.00221	3.19	11488	55	918	14	4.38871	[CCL19 - chemokine (c-c motif) ligand 19, TNFRSF14 - tumor necrosis factor receptor superfamily, member 14, CD83 - cd83 molecule, RIPK2 - receptor-interacting serine-threonine kinase 2, EBI3 - epstein-barr virus induced 3, IL12B - interleukin 12b (natural killer cell stimulatory factor 2, cytotoxic lymphocyte maturation factor 2, p40), IL23A - interleukin 23, alpha subunit p19, IRF1 - interferon …
GO:0071260	cellular response to mechanical stimulus	7.66e-05	0.00222	3.19	11488	55	918	14	4.38871	[MMP7 - matrix metallopeptidase 7 (matrilysin, uterine), NFKB1 - nuclear factor of kappa light polypeptide gene enhancer in b-cells 1, KCNJ2 - potassium inwardly-rectifying channel, subfamily j, member 2, IL1B - interleukin 1, beta, CD40 - cd40 molecule, tnf receptor superfamily member 5, ANKRD1 - ankyrin repeat domain 1 (cardiac muscle), PTGER4 - prostaglandin e receptor 4 (subtype ep4), IRF1 - …
GO:0043405	regulation of MAP kinase activity	7.7e-05	0.00222	1.95	11488	231	918	36	18.4615	[TRIB3 - tribbles homolog 3 (drosophila), GADD45B - growth arrest and dna-damage-inducible, beta, TRIB1 - tribbles homolog 1 (drosophila), MAP3K8 - mitogen-activated protein kinase kinase kinase 8, LYN - v-yes-1 yamaguchi sarcoma viral related oncogene homolog, SPAG9 - sperm associated antigen 9, PTK2B - protein tyrosine kinase 2 beta, SMPD1 - sphingomyelin phosphodiesterase 1, acid lysosomal, MA…
GO:2001234	negative regulation of apoptotic signaling pathway	8.06e-05	0.00232	2.19	11488	154	918	27	12.3288	[ICAM1 - intercellular adhesion molecule 1, RELA - v-rel avian reticuloendotheliosis viral oncogene homolog a, NFE2L2 - nuclear factor (erythroid-derived 2)-like 2, CTNNA1 - catenin (cadherin-associated protein), alpha 1, 102kda, LGALS3 - lectin, galactoside-binding, soluble, 3, HYOU1 - hypoxia up-regulated 1, XBP1 - x-box binding protein 1, PEA15 - phosphoprotein enriched in astrocytes 15, CSF2 …
GO:2000516	positive regulation of CD4-positive, alpha-beta T cell activation	8.07e-05	0.00232	4.51	11488	25	918	9	1.99557	[IL23A - interleukin 23, alpha subunit p19, CCL19 - chemokine (c-c motif) ligand 19, NLRP3 - nlr family, pyrin domain containing 3, CD83 - cd83 molecule, RIPK2 - receptor-interacting serine-threonine kinase 2, IL6 - interleukin 6 (interferon, beta 2), IL12B - interleukin 12b (natural killer cell stimulatory factor 2, cytotoxic lymphocyte maturation factor 2, p40), CD80 - cd80 molecule, IFNG - int…
GO:0002827	positive regulation of T-helper 1 type immune response	8.34e-05	0.00236	6.83	11488	11	918	6	0.878477	[IL23A - interleukin 23, alpha subunit p19, SLC11A1 - solute carrier family 11 (proton-coupled divalent metal ion transporter), member 1, CCL19 - chemokine (c-c motif) ligand 19, RIPK2 - receptor-interacting serine-threonine kinase 2, IL12B - interleukin 12b (natural killer cell stimulatory factor 2, cytotoxic lymphocyte maturation factor 2, p40), CD80 - cd80 molecule]
GO:0046349	amino sugar biosynthetic process	8.34e-05	0.00236	6.83	11488	11	918	6	0.878477	[AMDHD2 - amidohydrolase domain containing 2, PGM3 - phosphoglucomutase 3, GNPDA1 - glucosamine-6-phosphate deaminase 1, NAGK - n-acetylglucosamine kinase, GNPNAT1 - glucosamine-phosphate n-acetyltransferase 1, UAP1 - udp-n-acteylglucosamine pyrophosphorylase 1]
GO:0042510	regulation of tyrosine phosphorylation of Stat1 protein	8.34e-05	0.00237	6.83	11488	11	918	6	0.878477	[IL23A - interleukin 23, alpha subunit p19, SOCS3 - suppressor of cytokine signaling 3, SOCS1 - suppressor of cytokine signaling 1, CD40 - cd40 molecule, tnf receptor superfamily member 5, IL12B - interleukin 12b (natural killer cell stimulatory factor 2, cytotoxic lymphocyte maturation factor 2, p40), IFNG - interferon, gamma]
GO:1903513	endoplasmic reticulum to cytosol transport	8.34e-05	0.00237	6.83	11488	11	918	6	0.878477	[HSP90B1 - heat shock protein 90kda beta (grp94), member 1, DERL2 - derlin 2, VCP - valosin containing protein, VIMP - vcp-interacting membrane protein, NPLOC4 - nuclear protein localization 4 homolog (s. cerevisiae), SEC61B - sec61 beta subunit]
GO:0050730	regulation of peptidyl-tyrosine phosphorylation	8.3e-05	0.00238	2.23	11488	146	918	26	11.6592	[ICAM1 - intercellular adhesion molecule 1, SAMSN1 - sam domain, sh3 domain and nuclear localization signals 1, SOCS1 - suppressor of cytokine signaling 1, STAT3 - signal transducer and activator of transcription 3 (acute-phase response factor), ADAM17 - adam metallopeptidase domain 17, IL12B - interleukin 12b (natural killer cell stimulatory factor 2, cytotoxic lymphocyte maturation factor 2, p4…
GO:0016064	immunoglobulin mediated immune response	8.34e-05	0.00238	6.83	11488	11	918	6	0.878477	[BCL3 - b-cell cll/lymphoma 3, HLA-DQB1 - major histocompatibility complex, class ii, dq beta 1, ZP3 - zona pellucida glycoprotein 3 (sperm receptor), IRF7 - interferon regulatory factor 7, FCER1G - fc fragment of ige, high affinity i, receptor for; gamma polypeptide, PRKCD - protein kinase c, delta]
GO:0030970	retrograde protein transport, ER to cytosol	8.34e-05	0.00238	6.83	11488	11	918	6	0.878477	[HSP90B1 - heat shock protein 90kda beta (grp94), member 1, VCP - valosin containing protein, DERL2 - derlin 2, SEC61B - sec61 beta subunit, NPLOC4 - nuclear protein localization 4 homolog (s. cerevisiae), VIMP - vcp-interacting membrane protein]
GO:0032479	regulation of type I interferon production	8.47e-05	0.00239	2.61	11488	91	918	19	7.27969	[FLOT1 - flotillin 1, DHX58 - dexh (asp-glu-x-his) box polypeptide 58, UBE2L6 - ubiquitin-conjugating enzyme e2l 6, NFKB2 - nuclear factor of kappa light polypeptide gene enhancer in b-cells 2 (p49/p100), RIPK2 - receptor-interacting serine-threonine kinase 2, NFKB1 - nuclear factor of kappa light polypeptide gene enhancer in b-cells 1, TICAM1 - toll-like receptor adaptor molecule 1, HAVCR2 - hep…
GO:0032728	positive regulation of interferon-beta production	8.51e-05	0.00239	5.01	11488	20	918	8	1.59681	[FLOT1 - flotillin 1, IRF1 - interferon regulatory factor 1, IRF7 - interferon regulatory factor 7, POLR3C - polymerase (rna) iii (dna directed) polypeptide c (62kd), IFIH1 - interferon induced with helicase c domain 1, RIPK2 - receptor-interacting serine-threonine kinase 2, TBK1 - tank-binding kinase 1, TICAM1 - toll-like receptor adaptor molecule 1]
GO:0042346	positive regulation of NF-kappaB import into nucleus	8.51e-05	0.00239	5.01	11488	20	918	8	1.59681	[IL23A - interleukin 23, alpha subunit p19, TNF - tumor necrosis factor, CCL19 - chemokine (c-c motif) ligand 19, TNFSF14 - tumor necrosis factor (ligand) superfamily, member 14, PTGS2 - prostaglandin-endoperoxide synthase 2 (prostaglandin g/h synthase and cyclooxygenase), SPHK1 - sphingosine kinase 1, IL1B - interleukin 1, beta, IL12B - interleukin 12b (natural killer cell stimulatory factor 2, …
GO:0043552	positive regulation of phosphatidylinositol 3-kinase activity	8.51e-05	0.0024	5.01	11488	20	918	8	1.59681	[CCL19 - chemokine (c-c motif) ligand 19, CCR7 - chemokine (c-c motif) receptor 7, LYN - v-yes-1 yamaguchi sarcoma viral related oncogene homolog, PTK2B - protein tyrosine kinase 2 beta, SRC - v-src avian sarcoma (schmidt-ruppin a-2) viral oncogene homolog, CDC42 - cell division cycle 42, FGR - feline gardner-rasheed sarcoma viral oncogene homolog, NOD2 - nucleotide-binding oligomerization domain…
GO:0010628	positive regulation of gene expression	8.78e-05	0.00246	1.38	11488	1123	918	124	89.8551	[ELL - elongation factor rna polymerase ii, NDN - necdin, melanoma antigen (mage) family member, PLAC8 - placenta-specific 8, CDC42 - cell division cycle 42, RELA - v-rel avian reticuloendotheliosis viral oncogene homolog a, OSM - oncostatin m, TMED2 - transmembrane emp24 domain trafficking protein 2, LDLR - low density lipoprotein receptor, ZBTB17 - zinc finger and btb domain containing 17, NCOR…
GO:0060341	regulation of cellular localization	8.96e-05	0.0025	1.55	11488	588	918	73	47.0968	[BNIP3L - bcl2/adenovirus e1b 19kda interacting protein 3-like, PNKD - paroxysmal nonkinesigenic dyskinesia, ATP2A2 - atpase, ca++ transporting, cardiac muscle, slow twitch 2, CDC42 - cell division cycle 42, CXCL9 - chemokine (c-x-c motif) ligand 9, RHOQ - ras homolog family member q, IL12B - interleukin 12b (natural killer cell stimulatory factor 2, cytotoxic lymphocyte maturation factor 2, p40)…
GO:0060401	cytosolic calcium ion transport	9.48e-05	0.00262	4.04	11488	31	918	10	2.47525	[CCL19 - chemokine (c-c motif) ligand 19, MCOLN1 - mucolipin 1, P2RX7 - purinergic receptor p2x, ligand-gated ion channel, 7, ERO1L - ero1-like (s. cerevisiae), CCR7 - chemokine (c-c motif) receptor 7, ATP2A2 - atpase, ca++ transporting, cardiac muscle, slow twitch 2, ADRA1A - adrenoceptor alpha 1a, JPH2 - junctophilin 2, ITPR1 - inositol 1,4,5-trisphosphate receptor, type 1, CCL3 - chemokine (c-…
GO:0017157	regulation of exocytosis	9.46e-05	0.00263	2.46	11488	107	918	21	8.53659	[STXBP6 - syntaxin binding protein 6 (amisyn), RALB - v-ral simian leukemia viral oncogene homolog b, LAMP1 - lysosomal-associated membrane protein 1, STX4 - syntaxin 4, CEACAM1 - carcinoembryonic antigen-related cell adhesion molecule 1 (biliary glycoprotein), RAB7A - rab7a, member ras oncogene family, ZP3 - zona pellucida glycoprotein 3 (sperm receptor), RAB21 - rab21, member ras oncogene famil…
GO:0048661	positive regulation of smooth muscle cell proliferation	9.48e-05	0.00263	3.13	11488	56	918	14	4.47284	[ID2 - inhibitor of dna binding 2, dominant negative helix-loop-helix protein, PTAFR - platelet-activating factor receptor, JUN - jun proto-oncogene, STAT1 - signal transducer and activator of transcription 1, 91kda, TGM2 - transglutaminase 2, TNF - tumor necrosis factor, THBS1 - thrombospondin 1, EDN1 - endothelin 1, NAMPT - nicotinamide phosphoribosyltransferase, HMOX1 - heme oxygenase (decycli…
GO:0050819	negative regulation of coagulation	9.48e-05	0.00263	4.04	11488	31	918	10	2.47525	[PLAU - plasminogen activator, urokinase, ANXA5 - annexin a5, PLAUR - plasminogen activator, urokinase receptor, CEACAM1 - carcinoembryonic antigen-related cell adhesion molecule 1 (biliary glycoprotein), ANXA2 - annexin a2, EDN1 - endothelin 1, C1QTNF1 - c1q and tumor necrosis factor related protein 1, PRKCD - protein kinase c, delta, F12 - coagulation factor xii (hageman factor), SERPING1 - ser…
GO:0032642	regulation of chemokine production	9.48e-05	0.00264	3.13	11488	56	918	14	4.47284	[FFAR2 - free fatty acid receptor 2, RIPK2 - receptor-interacting serine-threonine kinase 2, ADAM17 - adam metallopeptidase domain 17, IL1B - interleukin 1, beta, TICAM1 - toll-like receptor adaptor molecule 1, IL1A - interleukin 1, alpha, HAVCR2 - hepatitis a virus cellular receptor 2, EGR1 - early growth response 1, TNF - tumor necrosis factor, HMOX1 - heme oxygenase (decycling) 1, IL6 - interl…
GO:0050866	negative regulation of cell activation	9.69e-05	0.00267	2.39	11488	115	918	22	9.20502	[ID2 - inhibitor of dna binding 2, dominant negative helix-loop-helix protein, ZC3H12A - zinc finger ccch-type containing 12a, SAMSN1 - sam domain, sh3 domain and nuclear localization signals 1, CEACAM1 - carcinoembryonic antigen-related cell adhesion molecule 1 (biliary glycoprotein), C1QTNF1 - c1q and tumor necrosis factor related protein 1, TNFRSF14 - tumor necrosis factor receptor superfamily…
GO:1901136	carbohydrate derivative catabolic process	9.77e-05	0.00269	2.34	11488	123	918	23	9.82906	[NEU1 - sialidase 1 (lysosomal sialidase), GALC - galactosylceramidase, GBA - glucosidase, beta, acid, EDEM1 - er degradation enhancer, mannosidase alpha-like 1, GBA3 - glucosidase, beta, acid 3, CD44 - cd44 molecule (indian blood group), GNS - glucosamine (n-acetyl)-6-sulfatase, AMPD3 - adenosine monophosphate deaminase 3, SDC4 - syndecan 4, MGAT1 - mannosyl (alpha-1,3-)-glycoprotein beta-1,2-n-…
GO:0051897	positive regulation of protein kinase B signaling	9.84e-05	0.00269	2.98	11488	63	918	15	5.03356	[CCL19 - chemokine (c-c motif) ligand 19, C19orf10 - chromosome 19 open reading frame 10, CCR7 - chemokine (c-c motif) receptor 7, CSF3 - colony stimulating factor 3 (granulocyte), ZP3 - zona pellucida glycoprotein 3 (sperm receptor), C1QTNF1 - c1q and tumor necrosis factor related protein 1, CCL3 - chemokine (c-c motif) ligand 3, TNF - tumor necrosis factor, THBS1 - thrombospondin 1, SRC - v-src…
GO:0051353	positive regulation of oxidoreductase activity	9.84e-05	0.00269	3.72	11488	37	918	11	2.95699	[CYP27B1 - cytochrome p450, family 27, subfamily b, polypeptide 1, TNF - tumor necrosis factor, PTK2B - protein tyrosine kinase 2 beta, EDN1 - endothelin 1, SNCA - synuclein, alpha (non a4 component of amyloid precursor), GCH1 - gtp cyclohydrolase 1, NOD2 - nucleotide-binding oligomerization domain containing 2, IL1B - interleukin 1, beta, CYBA - cytochrome b-245, alpha polypeptide, HIF1A - hypox…
GO:0050793	regulation of developmental process	9.85e-05	0.00269	1.32	11488	1477	918	156	118.182	[TRIB3 - tribbles homolog 3 (drosophila), PLAC8 - placenta-specific 8, CD83 - cd83 molecule, CDC42 - cell division cycle 42, CXCL9 - chemokine (c-x-c motif) ligand 9, ABCA1 - atp-binding cassette, sub-family a (abc1), member 1, SDCBP - syndecan binding protein (syntenin), IL12B - interleukin 12b (natural killer cell stimulatory factor 2, cytotoxic lymphocyte maturation factor 2, p40), SPP1 - secr…
GO:0043200	response to amino acid	9.83e-05	0.0027	2.86	11488	70	918	16	5.59441	[ICAM1 - intercellular adhesion molecule 1, SOCS1 - suppressor of cytokine signaling 1, CCL2 - chemokine (c-c motif) ligand 2, ASS1 - argininosuccinate synthase 1, RRAGD - ras-related gtp binding d, RELA - v-rel avian reticuloendotheliosis viral oncogene homolog a, RRAGC - ras-related gtp binding c, CPEB4 - cytoplasmic polyadenylation element binding protein 4, TNF - tumor necrosis factor, LYN - …
GO:1904951	positive regulation of establishment of protein localization	9.99e-05	0.00272	1.71	11488	373	918	51	29.8246	[CDC42 - cell division cycle 42, IL12B - interleukin 12b (natural killer cell stimulatory factor 2, cytotoxic lymphocyte maturation factor 2, p40), CD274 - cd274 molecule, IL23A - interleukin 23, alpha subunit p19, ZBTB17 - zinc finger and btb domain containing 17, CD58 - cd58 molecule, CASP5 - caspase 5, apoptosis-related cysteine peptidase, KCNN4 - potassium intermediate/small conductance calci…
GO:0006357	regulation of transcription from RNA polymerase II promoter	0.000102	0.00278	1.36	11488	1203	918	131	96.3235	[TRIB3 - tribbles homolog 3 (drosophila), ELL - elongation factor rna polymerase ii, NDN - necdin, melanoma antigen (mage) family member, PLAC8 - placenta-specific 8, CREG1 - cellular repressor of e1a-stimulated genes 1, TRAK1 - trafficking protein, kinesin binding 1, RELA - v-rel avian reticuloendotheliosis viral oncogene homolog a, OSM - oncostatin m, NCOR2 - nuclear receptor corepressor 2, AGR…
GO:0030100	regulation of endocytosis	0.000108	0.00293	2.23	11488	140	918	25	11.2108	[FLOT1 - flotillin 1, RAB21 - rab21, member ras oncogene family, SNCA - synuclein, alpha (non a4 component of amyloid precursor), SDCBP - syndecan binding protein (syntenin), DLL1 - delta-like 1 (drosophila), SLC11A1 - solute carrier family 11 (proton-coupled divalent metal ion transporter), member 1, CD14 - cd14 molecule, LGALS3 - lectin, galactoside-binding, soluble, 3, CCL19 - chemokine (c-c m…
GO:1901653	cellular response to peptide	0.000111	0.00299	2.32	11488	124	918	23	9.91379	[TRIB3 - tribbles homolog 3 (drosophila), CEACAM1 - carcinoembryonic antigen-related cell adhesion molecule 1 (biliary glycoprotein), GNG2 - guanine nucleotide binding protein (g protein), gamma 2, RIPK2 - receptor-interacting serine-threonine kinase 2, STAT1 - signal transducer and activator of transcription 1, 91kda, NFKB1 - nuclear factor of kappa light polypeptide gene enhancer in b-cells 1, …
GO:0051480	regulation of cytosolic calcium ion concentration	0.000111	0.00299	2.32	11488	124	918	23	9.91379	[MCOLN1 - mucolipin 1, CCL19 - chemokine (c-c motif) ligand 19, CCR7 - chemokine (c-c motif) receptor 7, P2RX7 - purinergic receptor p2x, ligand-gated ion channel, 7, C1QTNF1 - c1q and tumor necrosis factor related protein 1, TGM2 - transglutaminase 2, NMB - neuromedin b, JPH2 - junctophilin 2, CCR1 - chemokine (c-c motif) receptor 1, CCL3 - chemokine (c-c motif) ligand 3, C3AR1 - complement comp…
GO:1903531	negative regulation of secretion by cell	0.000111	0.003	2.37	11488	116	918	22	9.2827	[STXBP6 - syntaxin binding protein 6 (amisyn), RSAD2 - radical s-adenosyl methionine domain containing 2, ZC3H12A - zinc finger ccch-type containing 12a, TNFRSF9 - tumor necrosis factor receptor superfamily, member 9, CEACAM1 - carcinoembryonic antigen-related cell adhesion molecule 1 (biliary glycoprotein), RAB7A - rab7a, member ras oncogene family, PNKD - paroxysmal nonkinesigenic dyskinesia, S…
GO:0016337	single organismal cell-cell adhesion	0.000111	0.003	1.8	11488	299	918	43	23.8889	[MICB - mhc class i polypeptide-related sequence b, ICAM1 - intercellular adhesion molecule 1, CLEC4D - c-type lectin domain family 4, member d, CLEC4E - c-type lectin domain family 4, member e, BATF - basic leucine zipper transcription factor, atf-like, CDC42 - cell division cycle 42, EBI3 - epstein-barr virus induced 3, ADAM17 - adam metallopeptidase domain 17, IL12B - interleukin 12b (natural …
GO:0097028	dendritic cell differentiation	0.000115	0.00308	4.33	11488	26	918	9	2.07852	[CCL19 - chemokine (c-c motif) ligand 19, CCR7 - chemokine (c-c motif) receptor 7, LYN - v-yes-1 yamaguchi sarcoma viral related oncogene homolog, BATF - basic leucine zipper transcription factor, atf-like, CSF2 - colony stimulating factor 2 (granulocyte-macrophage), UBD - ubiquitin d, LTBR - lymphotoxin beta receptor (tnfr superfamily, member 3), BATF2 - basic leucine zipper transcription factor…
GO:0032269	negative regulation of cellular protein metabolic process	0.000117	0.00313	1.5	11488	685	918	82	54.6667	[TRIB3 - tribbles homolog 3 (drosophila), CSTB - cystatin b (stefin b), SOCS1 - suppressor of cytokine signaling 1, SDCBP - syndecan binding protein (syntenin), SPINK1 - serine peptidase inhibitor, kazal type 1, CD59 - cd59 molecule, complement regulatory protein, CARD17 - caspase recruitment domain family, member 17, ATF3 - activating transcription factor 3, PID1 - phosphotyrosine interaction do…
GO:0070482	response to oxygen levels	0.000117	0.00313	1.98	11488	209	918	33	16.6667	[LONP1 - lon peptidase 1, mitochondrial, ICAM1 - intercellular adhesion molecule 1, DDIT4 - dna-damage-inducible transcript 4, BNIP3L - bcl2/adenovirus e1b 19kda interacting protein 3-like, ATG7 - autophagy related 7, ADAM17 - adam metallopeptidase domain 17, CPEB4 - cytoplasmic polyadenylation element binding protein 4, PLAU - plasminogen activator, urokinase, EGR1 - early growth response 1, NFE…
GO:0002285	lymphocyte activation involved in immune response	0.000118	0.00314	2.82	11488	71	918	16	5.67376	[ICAM1 - intercellular adhesion molecule 1, CLEC4D - c-type lectin domain family 4, member d, CLEC4E - c-type lectin domain family 4, member e, BATF - basic leucine zipper transcription factor, atf-like, IL12B - interleukin 12b (natural killer cell stimulatory factor 2, cytotoxic lymphocyte maturation factor 2, p40), DLL1 - delta-like 1 (drosophila), SEMA4A - sema domain, immunoglobulin domain (i…
GO:0050818	regulation of coagulation	0.000119	0.00317	2.93	11488	64	918	15	5.11945	[CEACAM1 - carcinoembryonic antigen-related cell adhesion molecule 1 (biliary glycoprotein), C1QTNF1 - c1q and tumor necrosis factor related protein 1, F12 - coagulation factor xii (hageman factor), SERPING1 - serpin peptidase inhibitor, clade g (c1 inhibitor), member 1, PLAU - plasminogen activator, urokinase, NFE2L2 - nuclear factor (erythroid-derived 2)-like 2, ANXA5 - annexin a5, PLAUR - plas…
GO:0051282	regulation of sequestering of calcium ion	0.000119	0.00317	2.93	11488	64	918	15	5.11945	[CCL19 - chemokine (c-c motif) ligand 19, MCOLN1 - mucolipin 1, P2RX7 - purinergic receptor p2x, ligand-gated ion channel, 7, CCR7 - chemokine (c-c motif) receptor 7, SNCA - synuclein, alpha (non a4 component of amyloid precursor), CXCL10 - chemokine (c-x-c motif) ligand 10, CXCL9 - chemokine (c-x-c motif) ligand 9, JPH2 - junctophilin 2, CCL3 - chemokine (c-c motif) ligand 3, ERO1L - ero1-like (…
GO:0008150	biological_process	0.000122	0.00322	1.03	11488	10578	918	873	847.573	[ELL - elongation factor rna polymerase ii, AGAP3 - arfgap with gtpase domain, ankyrin repeat and ph domain 3, BTG3 - btg family, member 3, ABCA1 - atp-binding cassette, sub-family a (abc1), member 1, SEC61B - sec61 beta subunit, ABCF1 - atp-binding cassette, sub-family f (gcn20), member 1, TMED2 - transmembrane emp24 domain trafficking protein 2, GCGR - glucagon receptor, GCH1 - gtp cyclohydrola…
GO:0001836	release of cytochrome c from mitochondria	0.000122	0.00324	5.47	11488	16	918	7	1.27971	[BOK - bcl2-related ovarian killer, BCL2A1 - bcl2-related protein a1, SOD2 - superoxide dismutase 2, mitochondrial, BCL2L1 - bcl2-like 1, JUN - jun proto-oncogene, BID - bh3 interacting domain death agonist, IFI6 - interferon, alpha-inducible protein 6]
GO:0051336	regulation of hydrolase activity	0.000126	0.00332	1.42	11488	896	918	102	71.831	[BOK - bcl2-related ovarian killer, ELL - elongation factor rna polymerase ii, AGAP3 - arfgap with gtpase domain, ankyrin repeat and ph domain 3, DENND5A - denn/madd domain containing 5a, RIN2 - ras and rab interactor 2, SPINK1 - serine peptidase inhibitor, kazal type 1, TMED2 - transmembrane emp24 domain trafficking protein 2, RDX - radixin, GCGR - glucagon receptor, AGRN - agrin, MKKS - mckusic…
GO:0042306	regulation of protein import into nucleus	0.000126	0.00332	2.3	11488	125	918	23	10	[ZC3H12A - zinc finger ccch-type containing 12a, CCL19 - chemokine (c-c motif) ligand 19, CSF3 - colony stimulating factor 3 (granulocyte), NFKBIA - nuclear factor of kappa light polypeptide gene enhancer in b-cells inhibitor, alpha, LITAF - lipopolysaccharide-induced tnf factor, CDKN1A - cyclin-dependent kinase inhibitor 1a (p21, cip1), SPHK1 - sphingosine kinase 1, IL1B - interleukin 1, beta, I…
GO:0015991	ATP hydrolysis coupled proton transport	0.000128	0.00336	4.77	11488	21	918	8	1.67715	[ATP6V1E1 - atpase, h+ transporting, lysosomal 31kda, v1 subunit e1, ATP6V1H - atpase, h+ transporting, lysosomal 50/57kda, v1 subunit h, ATP6V1F - atpase, h+ transporting, lysosomal 14kda, v1 subunit f, ATP5G1 - atp synthase, h+ transporting, mitochondrial fo complex, subunit c1 (subunit 9), ATP6V0D1 - atpase, h+ transporting, lysosomal 38kda, v0 subunit d1, ATP6V0E1 - atpase, h+ transporting, l…
GO:2000514	regulation of CD4-positive, alpha-beta T cell activation	0.000128	0.00336	3.91	11488	32	918	10	2.55754	[IL23A - interleukin 23, alpha subunit p19, CCL19 - chemokine (c-c motif) ligand 19, NLRP3 - nlr family, pyrin domain containing 3, IL27 - interleukin 27, CD83 - cd83 molecule, RIPK2 - receptor-interacting serine-threonine kinase 2, IL6 - interleukin 6 (interferon, beta 2), IL12B - interleukin 12b (natural killer cell stimulatory factor 2, cytotoxic lymphocyte maturation factor 2, p40), CD80 - cd…
GO:0015988	energy coupled proton transmembrane transport, against electrochemical gradient	0.000128	0.00337	4.77	11488	21	918	8	1.67715	[ATP6V1E1 - atpase, h+ transporting, lysosomal 31kda, v1 subunit e1, ATP6V1H - atpase, h+ transporting, lysosomal 50/57kda, v1 subunit h, ATP6V1F - atpase, h+ transporting, lysosomal 14kda, v1 subunit f, ATP5G1 - atp synthase, h+ transporting, mitochondrial fo complex, subunit c1 (subunit 9), ATP6V0D1 - atpase, h+ transporting, lysosomal 38kda, v0 subunit d1, ATP6V0E1 - atpase, h+ transporting, l…
GO:2001237	negative regulation of extrinsic apoptotic signaling pathway	0.000134	0.00349	2.69	11488	79	918	17	6.3197	[ICAM1 - intercellular adhesion molecule 1, PEA15 - phosphoprotein enriched in astrocytes 15, CSF2 - colony stimulating factor 2 (granulocyte-macrophage), IL1B - interleukin 1, beta, IL1A - interleukin 1, alpha, DAPK1 - death-associated protein kinase 1, RELA - v-rel avian reticuloendotheliosis viral oncogene homolog a, TNF - tumor necrosis factor, CTNNA1 - catenin (cadherin-associated protein), …
GO:0002695	negative regulation of leukocyte activation	0.00014	0.00364	2.45	11488	102	918	20	8.16327	[ID2 - inhibitor of dna binding 2, dominant negative helix-loop-helix protein, ZC3H12A - zinc finger ccch-type containing 12a, SAMSN1 - sam domain, sh3 domain and nuclear localization signals 1, CEACAM1 - carcinoembryonic antigen-related cell adhesion molecule 1 (biliary glycoprotein), TNFRSF14 - tumor necrosis factor receptor superfamily, member 14, NFKBID - nuclear factor of kappa light polypep…
GO:0036500	ATF6-mediated unfolded protein response	0.000147	0.00383	7.82	11488	8	918	5	0.639386	[CALR - calreticulin, HSP90B1 - heat shock protein 90kda beta (grp94), member 1, HSPA5 - heat shock 70kda protein 5 (glucose-regulated protein, 78kda), ATF6 - activating transcription factor 6, XBP1 - x-box binding protein 1]
GO:0060556	regulation of vitamin D biosynthetic process	0.000147	0.00383	7.82	11488	8	918	5	0.639386	[CYP27B1 - cytochrome p450, family 27, subfamily b, polypeptide 1, TNF - tumor necrosis factor, NFKB1 - nuclear factor of kappa light polypeptide gene enhancer in b-cells 1, IL1B - interleukin 1, beta, IFNG - interferon, gamma]
GO:0036293	response to decreased oxygen levels	0.000149	0.00388	2	11488	194	918	31	15.5	[LONP1 - lon peptidase 1, mitochondrial, ICAM1 - intercellular adhesion molecule 1, DDIT4 - dna-damage-inducible transcript 4, BNIP3L - bcl2/adenovirus e1b 19kda interacting protein 3-like, ADAM17 - adam metallopeptidase domain 17, CPEB4 - cytoplasmic polyadenylation element binding protein 4, PLAU - plasminogen activator, urokinase, EGR1 - early growth response 1, NFE2L2 - nuclear factor (erythr…
GO:0045087	innate immune response	0.00015	0.0039	1.78	11488	303	918	43	24.1573	[NCF2 - neutrophil cytosolic factor 2, MR1 - major histocompatibility complex, class i-related, MICB - mhc class i polypeptide-related sequence b, DHX58 - dexh (asp-glu-x-his) box polypeptide 58, CLEC4D - c-type lectin domain family 4, member d, CLEC4E - c-type lectin domain family 4, member e, F12 - coagulation factor xii (hageman factor), TICAM1 - toll-like receptor adaptor molecule 1, IL23A - …
GO:0051769	regulation of nitric-oxide synthase biosynthetic process	0.000155	0.004	6.26	11488	12	918	6	0.958466	[EDN1 - endothelin 1, NAMPT - nicotinamide phosphoribosyltransferase, CCL20 - chemokine (c-c motif) ligand 20, CCL2 - chemokine (c-c motif) ligand 2, VIMP - vcp-interacting membrane protein, NOD2 - nucleotide-binding oligomerization domain containing 2]
GO:0051023	regulation of immunoglobulin secretion	0.000155	0.00401	6.26	11488	12	918	6	0.958466	[TNFRSF4 - tumor necrosis factor receptor superfamily, member 4, TNF - tumor necrosis factor, STX4 - syntaxin 4, XBP1 - x-box binding protein 1, CD40 - cd40 molecule, tnf receptor superfamily member 5, IL6 - interleukin 6 (interferon, beta 2)]
GO:0002579	positive regulation of antigen processing and presentation	0.000155	0.00402	6.26	11488	12	918	6	0.958466	[SLC11A1 - solute carrier family 11 (proton-coupled divalent metal ion transporter), member 1, CCL19 - chemokine (c-c motif) ligand 19, CCR7 - chemokine (c-c motif) receptor 7, TAP2 - transporter 2, atp-binding cassette, sub-family b (mdr/tap), TAP1 - transporter 1, atp-binding cassette, sub-family b (mdr/tap), NOD2 - nucleotide-binding oligomerization domain containing 2]
GO:0071675	regulation of mononuclear cell migration	0.00016	0.00411	4.17	11488	27	918	9	2.15827	[C3AR1 - complement component 3a receptor 1, TNF - tumor necrosis factor, LYN - v-yes-1 yamaguchi sarcoma viral related oncogene homolog, THBS1 - thrombospondin 1, LGALS3 - lectin, galactoside-binding, soluble, 3, CXCL10 - chemokine (c-x-c motif) ligand 10, CCL2 - chemokine (c-c motif) ligand 2, PLA2G7 - phospholipase a2, group vii (platelet-activating factor acetylhydrolase, plasma), CCR1 - chem…
GO:0030099	myeloid cell differentiation	0.000162	0.00414	2.27	11488	127	918	23	10.1322	[ID2 - inhibitor of dna binding 2, dominant negative helix-loop-helix protein, CCL19 - chemokine (c-c motif) ligand 19, CCR7 - chemokine (c-c motif) receptor 7, VEGFA - vascular endothelial growth factor a, CSF3 - colony stimulating factor 3 (granulocyte), IRF8 - interferon regulatory factor 8, BATF - basic leucine zipper transcription factor, atf-like, CSF2 - colony stimulating factor 2 (granulo…
GO:1904589	regulation of protein import	0.000162	0.00414	2.27	11488	127	918	23	10.1322	[ZC3H12A - zinc finger ccch-type containing 12a, CCL19 - chemokine (c-c motif) ligand 19, CSF3 - colony stimulating factor 3 (granulocyte), NFKBIA - nuclear factor of kappa light polypeptide gene enhancer in b-cells inhibitor, alpha, LITAF - lipopolysaccharide-induced tnf factor, CDKN1A - cyclin-dependent kinase inhibitor 1a (p21, cip1), SPHK1 - sphingosine kinase 1, IL1B - interleukin 1, beta, I…
GO:0002286	T cell activation involved in immune response	0.000166	0.00425	3.53	11488	39	918	11	3.11615	[SEMA4A - sema domain, immunoglobulin domain (ig), transmembrane domain (tm) and short cytoplasmic domain, (semaphorin) 4a, SLC11A1 - solute carrier family 11 (proton-coupled divalent metal ion transporter), member 1, PTGER4 - prostaglandin e receptor 4 (subtype ep4), ICAM1 - intercellular adhesion molecule 1, BCL3 - b-cell cll/lymphoma 3, CLEC4E - c-type lectin domain family 4, member e, CLEC4D …
GO:0051250	negative regulation of lymphocyte activation	0.00017	0.00434	2.56	11488	88	918	18	7.03125	[ID2 - inhibitor of dna binding 2, dominant negative helix-loop-helix protein, CEACAM1 - carcinoembryonic antigen-related cell adhesion molecule 1 (biliary glycoprotein), SAMSN1 - sam domain, sh3 domain and nuclear localization signals 1, TNFRSF14 - tumor necrosis factor receptor superfamily, member 14, NFKBID - nuclear factor of kappa light polypeptide gene enhancer in b-cells inhibitor, delta, …
GO:0046638	positive regulation of alpha-beta T cell differentiation	0.000171	0.00434	3.79	11488	33	918	10	2.63852	[IL23A - interleukin 23, alpha subunit p19, CCL19 - chemokine (c-c motif) ligand 19, NLRP3 - nlr family, pyrin domain containing 3, ADA - adenosine deaminase, CD83 - cd83 molecule, RIPK2 - receptor-interacting serine-threonine kinase 2, IL6 - interleukin 6 (interferon, beta 2), IL12B - interleukin 12b (natural killer cell stimulatory factor 2, cytotoxic lymphocyte maturation factor 2, p40), CD80 …
GO:0043331	response to dsRNA	0.000171	0.00435	3.79	11488	33	918	10	2.63852	[SLC3A2 - solute carrier family 3 (amino acid transporter heavy chain), member 2, RALB - v-ral simian leukemia viral oncogene homolog b, FLOT1 - flotillin 1, P2RX7 - purinergic receptor p2x, ligand-gated ion channel, 7, DDX21 - dead (asp-glu-ala-asp) box helicase 21, IRAK3 - interleukin-1 receptor-associated kinase 3, RIPK2 - receptor-interacting serine-threonine kinase 2, NFKBIA - nuclear factor…
GO:0051128	regulation of cellular component organization	0.000172	0.00437	1.3	11488	1572	918	163	125.385	[BOK - bcl2-related ovarian killer, BNIP3L - bcl2/adenovirus e1b 19kda interacting protein 3-like, CDC42 - cell division cycle 42, SPIRE1 - spire actin nucleation factor 1, FCHSD2 - fch and double sh3 domains 2, CXCL9 - chemokine (c-x-c motif) ligand 9, ABCA1 - atp-binding cassette, sub-family a (abc1), member 1, SPP1 - secreted phosphoprotein 1, SDCBP - syndecan binding protein (syntenin), SDC4 …
GO:0001666	response to hypoxia	0.000177	0.00447	2.01	11488	187	918	30	14.9254	[ICAM1 - intercellular adhesion molecule 1, LONP1 - lon peptidase 1, mitochondrial, DDIT4 - dna-damage-inducible transcript 4, BNIP3L - bcl2/adenovirus e1b 19kda interacting protein 3-like, ADAM17 - adam metallopeptidase domain 17, EGR1 - early growth response 1, PLAU - plasminogen activator, urokinase, NFE2L2 - nuclear factor (erythroid-derived 2)-like 2, ERO1L - ero1-like (s. cerevisiae), PTK2B…
GO:0051048	negative regulation of secretion	0.000182	0.00459	2.25	11488	128	918	23	10.2222	[STXBP6 - syntaxin binding protein 6 (amisyn), RSAD2 - radical s-adenosyl methionine domain containing 2, ZC3H12A - zinc finger ccch-type containing 12a, TNFRSF9 - tumor necrosis factor receptor superfamily, member 9, CEACAM1 - carcinoembryonic antigen-related cell adhesion molecule 1 (biliary glycoprotein), RAB7A - rab7a, member ras oncogene family, PNKD - paroxysmal nonkinesigenic dyskinesia, S…
GO:0098602	single organism cell adhesion	0.000182	0.0046	1.75	11488	315	918	44	25.1429	[MICB - mhc class i polypeptide-related sequence b, ICAM1 - intercellular adhesion molecule 1, CLEC4E - c-type lectin domain family 4, member e, CLEC4D - c-type lectin domain family 4, member d, BATF - basic leucine zipper transcription factor, atf-like, CDC42 - cell division cycle 42, EBI3 - epstein-barr virus induced 3, ADAM17 - adam metallopeptidase domain 17, IL12B - interleukin 12b (natural …
GO:0003013	circulatory system process	0.000182	0.0046	2.25	11488	128	918	23	10.2222	[SCPEP1 - serine carboxypeptidase 1, ICAM1 - intercellular adhesion molecule 1, CEACAM1 - carcinoembryonic antigen-related cell adhesion molecule 1 (biliary glycoprotein), PTP4A3 - protein tyrosine phosphatase type iva, member 3, P2RY2 - purinergic receptor p2y, g-protein coupled, 2, PTAFR - platelet-activating factor receptor, SERPING1 - serpin peptidase inhibitor, clade g (c1 inhibitor), member…
GO:0033135	regulation of peptidyl-serine phosphorylation	0.000184	0.00463	2.63	11488	81	918	17	6.46388	[DDIT4 - dna-damage-inducible transcript 4, VEGFA - vascular endothelial growth factor a, CSF3 - colony stimulating factor 3 (granulocyte), RIPK2 - receptor-interacting serine-threonine kinase 2, CDC42 - cell division cycle 42, SNCA - synuclein, alpha (non a4 component of amyloid precursor), CD44 - cd44 molecule (indian blood group), PPP1R15A - protein phosphatase 1, regulatory subunit 15a, OSM -…
GO:0052548	regulation of endopeptidase activity	0.000185	0.00463	1.87	11488	241	918	36	19.2513	[BOK - bcl2-related ovarian killer, CSTB - cystatin b (stefin b), CARD16 - caspase recruitment domain family, member 16, PSME2 - proteasome (prosome, macropain) activator subunit 2 (pa28 beta), SNCA - synuclein, alpha (non a4 component of amyloid precursor), STAT3 - signal transducer and activator of transcription 3 (acute-phase response factor), SPINK1 - serine peptidase inhibitor, kazal type 1,…
GO:0043903	regulation of symbiosis, encompassing mutualism through parasitism	0.000186	0.00465	1.89	11488	232	918	35	18.5185	[MICB - mhc class i polypeptide-related sequence b, DHX58 - dexh (asp-glu-x-his) box polypeptide 58, JUN - jun proto-oncogene, STAT1 - signal transducer and activator of transcription 1, 91kda, SQSTM1 - sequestosome 1, IL12B - interleukin 12b (natural killer cell stimulatory factor 2, cytotoxic lymphocyte maturation factor 2, p40), IL23A - interleukin 23, alpha subunit p19, OSBP - oxysterol bindi…
GO:0090218	positive regulation of lipid kinase activity	0.000187	0.00466	4.55	11488	22	918	8	1.75824	[CCL19 - chemokine (c-c motif) ligand 19, CCR7 - chemokine (c-c motif) receptor 7, LYN - v-yes-1 yamaguchi sarcoma viral related oncogene homolog, PTK2B - protein tyrosine kinase 2 beta, SRC - v-src avian sarcoma (schmidt-ruppin a-2) viral oncogene homolog, CDC42 - cell division cycle 42, FGR - feline gardner-rasheed sarcoma viral oncogene homolog, NOD2 - nucleotide-binding oligomerization domain…
GO:1902624	positive regulation of neutrophil migration	0.000187	0.00467	4.55	11488	22	918	8	1.75824	[C3AR1 - complement component 3a receptor 1, IL23A - interleukin 23, alpha subunit p19, CXCL2 - chemokine (c-x-c motif) ligand 2, CCL19 - chemokine (c-c motif) ligand 19, CXCL1 - chemokine (c-x-c motif) ligand 1 (melanoma growth stimulating activity, alpha), CCR7 - chemokine (c-c motif) receptor 7, IL8 - interleukin 8, IL1A - interleukin 1, alpha]
GO:0051608	histamine transport	0.00019	0.00467	10.01	11488	5	918	4	0.3996	[LYN - v-yes-1 yamaguchi sarcoma viral related oncogene homolog, EDN1 - endothelin 1, ADA - adenosine deaminase, CSF2 - colony stimulating factor 2 (granulocyte-macrophage)]
GO:0035434	copper ion transmembrane transport	0.00019	0.00468	10.01	11488	5	918	4	0.3996	[SLC11A2 - solute carrier family 11 (proton-coupled divalent metal ion transporter), member 2, SLC31A1 - solute carrier family 31 (copper transporter), member 1, ATOX1 - antioxidant 1 copper chaperone, SLC31A2 - solute carrier family 31 (copper transporter), member 2]
GO:0001821	histamine secretion	0.00019	0.00469	10.01	11488	5	918	4	0.3996	[LYN - v-yes-1 yamaguchi sarcoma viral related oncogene homolog, EDN1 - endothelin 1, CSF2 - colony stimulating factor 2 (granulocyte-macrophage), ADA - adenosine deaminase]
GO:0002885	positive regulation of hypersensitivity	0.00019	0.00469	10.01	11488	5	918	4	0.3996	[C3 - complement component 3, CCR7 - chemokine (c-c motif) receptor 7, FCER1G - fc fragment of ige, high affinity i, receptor for; gamma polypeptide, ZP3 - zona pellucida glycoprotein 3 (sperm receptor)]
GO:0032612	interleukin-1 production	0.00019	0.0047	10.01	11488	5	918	4	0.3996	[MR1 - major histocompatibility complex, class i-related, NLRP3 - nlr family, pyrin domain containing 3, IL1B - interleukin 1, beta, CASP1 - caspase 1, apoptosis-related cysteine peptidase]
GO:0032502	developmental process	0.000189	0.00471	1.2	11488	2937	918	281	234.167	[BOK - bcl2-related ovarian killer, ELL - elongation factor rna polymerase ii, NDN - necdin, melanoma antigen (mage) family member, PLAC8 - placenta-specific 8, HSD17B4 - hydroxysteroid (17-beta) dehydrogenase 4, SPRR1A - small proline-rich protein 1a, CREG1 - cellular repressor of e1a-stimulated genes 1, IER2 - immediate early response 2, SPP1 - secreted phosphoprotein 1, RELA - v-rel avian reti…
GO:0032611	interleukin-1 beta production	0.00019	0.00471	10.01	11488	5	918	4	0.3996	[MR1 - major histocompatibility complex, class i-related, NLRP3 - nlr family, pyrin domain containing 3, CASP1 - caspase 1, apoptosis-related cysteine peptidase, IL1B - interleukin 1, beta]
GO:0002577	regulation of antigen processing and presentation	0.000194	0.00475	5.15	11488	17	918	7	1.35922	[SLC11A1 - solute carrier family 11 (proton-coupled divalent metal ion transporter), member 1, CCL19 - chemokine (c-c motif) ligand 19, CCR7 - chemokine (c-c motif) receptor 7, TAP2 - transporter 2, atp-binding cassette, sub-family b (mdr/tap), THBS1 - thrombospondin 1, TAP1 - transporter 1, atp-binding cassette, sub-family b (mdr/tap), NOD2 - nucleotide-binding oligomerization domain containing …
GO:0010575	positive regulation of vascular endothelial growth factor production	0.000194	0.00476	5.15	11488	17	918	7	1.35922	[C3AR1 - complement component 3a receptor 1, C3 - complement component 3, PTGS2 - prostaglandin-endoperoxide synthase 2 (prostaglandin g/h synthase and cyclooxygenase), CYP1B1 - cytochrome p450, family 1, subfamily b, polypeptide 1, IL1B - interleukin 1, beta, IL1A - interleukin 1, alpha, HIF1A - hypoxia inducible factor 1, alpha subunit (basic helix-loop-helix transcription factor)]
GO:0051248	negative regulation of protein metabolic process	0.000196	0.0048	1.46	11488	727	918	85	58.2192	[TRIB3 - tribbles homolog 3 (drosophila), CSTB - cystatin b (stefin b), SOCS1 - suppressor of cytokine signaling 1, SDCBP - syndecan binding protein (syntenin), RELA - v-rel avian reticuloendotheliosis viral oncogene homolog a, SPINK1 - serine peptidase inhibitor, kazal type 1, CD59 - cd59 molecule, complement regulatory protein, CARD17 - caspase recruitment domain family, member 17, ATF3 - activ…
GO:0097191	extrinsic apoptotic signaling pathway	0.000197	0.0048	2.71	11488	74	918	16	5.90406	[BOK - bcl2-related ovarian killer, TNFRSF9 - tumor necrosis factor receptor superfamily, member 9, P2RX7 - purinergic receptor p2x, ligand-gated ion channel, 7, G0S2 - g0/g1switch 2, IL1B - interleukin 1, beta, IL1A - interleukin 1, alpha, BID - bh3 interacting domain death agonist, DAPK1 - death-associated protein kinase 1, ACVR1B - activin a receptor, type ib, TNF - tumor necrosis factor, BCL2…
GO:1901617	organic hydroxy compound biosynthetic process	0.000197	0.00481	2.71	11488	74	918	16	5.90406	[PRKAG2 - protein kinase, amp-activated, gamma 2 non-catalytic subunit, LSS - lanosterol synthase (2,3-oxidosqualene-lanosterol cyclase), GBA - glucosidase, beta, acid, INSIG1 - insulin induced gene 1, PTAFR - platelet-activating factor receptor, SNCA - synuclein, alpha (non a4 component of amyloid precursor), MVD - mevalonate (diphospho) decarboxylase, CYB5R2 - cytochrome b5 reductase 2, SPHK1 -…
GO:0046890	regulation of lipid biosynthetic process	0.000198	0.00481	2.53	11488	89	918	18	7.11462	[TRIB3 - tribbles homolog 3 (drosophila), PRKAG2 - protein kinase, amp-activated, gamma 2 non-catalytic subunit, INSIG1 - insulin induced gene 1, CEACAM1 - carcinoembryonic antigen-related cell adhesion molecule 1 (biliary glycoprotein), ZP3 - zona pellucida glycoprotein 3 (sperm receptor), NSMAF - neutral sphingomyelinase (n-smase) activation associated factor, NFKB1 - nuclear factor of kappa li…
GO:1903038	negative regulation of leukocyte cell-cell adhesion	0.000206	0.00499	2.8	11488	67	918	15	5.35714	[CEACAM1 - carcinoembryonic antigen-related cell adhesion molecule 1 (biliary glycoprotein), NFKBID - nuclear factor of kappa light polypeptide gene enhancer in b-cells inhibitor, delta, TNFRSF14 - tumor necrosis factor receptor superfamily, member 14, ASS1 - argininosuccinate synthase 1, CD274 - cd274 molecule, SDC4 - syndecan 4, HAVCR2 - hepatitis a virus cellular receptor 2, LRRC32 - leucine r…
GO:0044070	regulation of anion transport	0.000206	0.005	3.07	11488	53	918	13	4.23453	[P2RX4 - purinergic receptor p2x, ligand-gated ion channel, 4, P2RX7 - purinergic receptor p2x, ligand-gated ion channel, 7, PTAFR - platelet-activating factor receptor, CLCN6 - chloride channel, voltage-sensitive 6, CLCN7 - chloride channel, voltage-sensitive 7, SNCA - synuclein, alpha (non a4 component of amyloid precursor), REPIN1 - replication initiator 1, IL1B - interleukin 1, beta, AHCYL1 -…
GO:1901135	carbohydrate derivative metabolic process	0.00021	0.00508	1.55	11488	533	918	66	42.5806	[UQCRC2 - ubiquinol-cytochrome c reductase core protein ii, PGM3 - phosphoglucomutase 3, GBA3 - glucosidase, beta, acid 3, PSAP - prosaposin, GNS - glucosamine (n-acetyl)-6-sulfatase, RHOQ - ras homolog family member q, NDST2 - n-deacetylase/n-sulfotransferase (heparan glucosaminyl) 2, SDC4 - syndecan 4, AHCYL1 - adenosylhomocysteinase-like 1, AGRN - agrin, SLC25A13 - solute carrier family 25 (as…
GO:0070304	positive regulation of stress-activated protein kinase signaling cascade	0.000211	0.00509	2.38	11488	105	918	20	8.40336	[ZC3H12A - zinc finger ccch-type containing 12a, CCL19 - chemokine (c-c motif) ligand 19, CCR7 - chemokine (c-c motif) receptor 7, VEGFA - vascular endothelial growth factor a, GADD45B - growth arrest and dna-damage-inducible, beta, GADD45G - growth arrest and dna-damage-inducible, gamma, RIPK2 - receptor-interacting serine-threonine kinase 2, CDC42 - cell division cycle 42, ZNF622 - zinc finger …
GO:0045670	regulation of osteoclast differentiation	0.000213	0.00514	3.44	11488	40	918	11	3.19767	[IL23A - interleukin 23, alpha subunit p19, TNF - tumor necrosis factor, FOS - fbj murine osteosarcoma viral oncogene homolog, CA2 - carbonic anhydrase ii, KLF10 - kruppel-like factor 10, CEBPB - ccaat/enhancer binding protein (c/ebp), beta, MAFB - v-maf avian musculoaponeurotic fibrosarcoma oncogene homolog b, CCR1 - chemokine (c-c motif) receptor 1, IL12B - interleukin 12b (natural killer cell …
GO:0043551	regulation of phosphatidylinositol 3-kinase activity	0.000219	0.00528	4.02	11488	28	918	9	2.23881	[CCL19 - chemokine (c-c motif) ligand 19, CCR7 - chemokine (c-c motif) receptor 7, LYN - v-yes-1 yamaguchi sarcoma viral related oncogene homolog, PTK2B - protein tyrosine kinase 2 beta, SRC - v-src avian sarcoma (schmidt-ruppin a-2) viral oncogene homolog, CDC42 - cell division cycle 42, FGR - feline gardner-rasheed sarcoma viral oncogene homolog, NOD2 - nucleotide-binding oligomerization domain…
GO:0046034	ATP metabolic process	0.000229	0.0055	2.5	11488	90	918	18	7.2	[PRKAG2 - protein kinase, amp-activated, gamma 2 non-catalytic subunit, UQCRC2 - ubiquinol-cytochrome c reductase core protein ii, AK2 - adenylate kinase 2, AK4 - adenylate kinase 4, HK2 - hexokinase 2, ATP6V1A - atpase, h+ transporting, lysosomal 70kda, v1 subunit a, AMPD3 - adenosine monophosphate deaminase 3, ALDOA - aldolase a, fructose-bisphosphate, ATP6V1B2 - atpase, h+ transporting, lysoso…
GO:0033674	positive regulation of kinase activity	0.000231	0.00554	1.7	11488	347	918	47	27.6471	[PRKAG2 - protein kinase, amp-activated, gamma 2 non-catalytic subunit, RALB - v-ral simian leukemia viral oncogene homolog b, CCR7 - chemokine (c-c motif) receptor 7, GADD45B - growth arrest and dna-damage-inducible, beta, MAP3K8 - mitogen-activated protein kinase kinase kinase 8, SNCA - synuclein, alpha (non a4 component of amyloid precursor), CDC42 - cell division cycle 42, ZNF622 - zinc finge…
GO:0071900	regulation of protein serine/threonine kinase activity	0.000231	0.00555	1.7	11488	347	918	47	27.6471	[PRKAG2 - protein kinase, amp-activated, gamma 2 non-catalytic subunit, TRIB3 - tribbles homolog 3 (drosophila), RALB - v-ral simian leukemia viral oncogene homolog b, GADD45B - growth arrest and dna-damage-inducible, beta, TRIB1 - tribbles homolog 1 (drosophila), MAP3K8 - mitogen-activated protein kinase kinase kinase 8, SNCA - synuclein, alpha (non a4 component of amyloid precursor), ADAM17 - a…
GO:0052547	regulation of peptidase activity	0.000234	0.00558	1.83	11488	253	918	37	20.2186	[BOK - bcl2-related ovarian killer, CSTB - cystatin b (stefin b), CARD16 - caspase recruitment domain family, member 16, PSME2 - proteasome (prosome, macropain) activator subunit 2 (pa28 beta), SNCA - synuclein, alpha (non a4 component of amyloid precursor), STAT3 - signal transducer and activator of transcription 3 (acute-phase response factor), SPINK1 - serine peptidase inhibitor, kazal type 1,…
GO:0045454	cell redox homeostasis	0.000252	0.00598	2.87	11488	61	918	14	4.87805	[NCF2 - neutrophil cytosolic factor 2, NCF4 - neutrophil cytosolic factor 4, 40kda, P4HB - prolyl 4-hydroxylase, beta polypeptide, QSOX1 - quiescin q6 sulfhydryl oxidase 1, SLC11A1 - solute carrier family 11 (proton-coupled divalent metal ion transporter), member 1, NFE2L2 - nuclear factor (erythroid-derived 2)-like 2, ERO1L - ero1-like (s. cerevisiae), PRDX1 - peroxiredoxin 1, PDIA6 - protein di…
GO:0002702	positive regulation of production of molecular mediator of immune response	0.000252	0.00599	3.01	11488	54	918	13	4.31894	[RSAD2 - radical s-adenosyl methionine domain containing 2, FFAR2 - free fatty acid receptor 2, STX4 - syntaxin 4, TNFRSF14 - tumor necrosis factor receptor superfamily, member 14, CD40 - cd40 molecule, tnf receptor superfamily member 5, TNFRSF4 - tumor necrosis factor receptor superfamily, member 4, NLRP3 - nlr family, pyrin domain containing 3, FCER1G - fc fragment of ige, high affinity i, rece…
GO:0030193	regulation of blood coagulation	0.000252	0.00599	2.87	11488	61	918	14	4.87805	[CEACAM1 - carcinoembryonic antigen-related cell adhesion molecule 1 (biliary glycoprotein), C1QTNF1 - c1q and tumor necrosis factor related protein 1, F12 - coagulation factor xii (hageman factor), SERPING1 - serpin peptidase inhibitor, clade g (c1 inhibitor), member 1, PLAU - plasminogen activator, urokinase, NFE2L2 - nuclear factor (erythroid-derived 2)-like 2, PLAUR - plasminogen activator, u…
GO:0006901	vesicle coating	0.000252	0.006	3.01	11488	54	918	13	4.31894	[SAR1B - sar1 homolog b (s. cerevisiae), SEC13 - sec13 homolog (s. cerevisiae), SEC24D - sec24 family, member d (s. cerevisiae), RAB1A - rab1a, member ras oncogene family, SEC22B - sec22 vesicle trafficking protein homolog b (s. cerevisiae) (gene/pseudogene), NAPA - n-ethylmaleimide-sensitive factor attachment protein, alpha, SERPINA1 - serpin peptidase inhibitor, clade a (alpha-1 antiproteinase,…
GO:1900046	regulation of hemostasis	0.000252	0.006	2.87	11488	61	918	14	4.87805	[CEACAM1 - carcinoembryonic antigen-related cell adhesion molecule 1 (biliary glycoprotein), C1QTNF1 - c1q and tumor necrosis factor related protein 1, F12 - coagulation factor xii (hageman factor), SERPING1 - serpin peptidase inhibitor, clade g (c1 inhibitor), member 1, PLAU - plasminogen activator, urokinase, NFE2L2 - nuclear factor (erythroid-derived 2)-like 2, PLAUR - plasminogen activator, u…
GO:0030154	cell differentiation	0.000259	0.00611	1.36	11488	1108	918	120	88.2353	[BOK - bcl2-related ovarian killer, PLAC8 - placenta-specific 8, HSD17B4 - hydroxysteroid (17-beta) dehydrogenase 4, SPRR1A - small proline-rich protein 1a, CDC42 - cell division cycle 42, PSAP - prosaposin, IER2 - immediate early response 2, IL12B - interleukin 12b (natural killer cell stimulatory factor 2, cytotoxic lymphocyte maturation factor 2, p40), SPP1 - secreted phosphoprotein 1, CLIC4 -…
GO:0043254	regulation of protein complex assembly	0.000262	0.00619	1.79	11488	273	918	39	21.7877	[RALB - v-ral simian leukemia viral oncogene homolog b, ICAM1 - intercellular adhesion molecule 1, CCR7 - chemokine (c-c motif) receptor 7, VPS18 - vacuolar protein sorting 18 homolog (s. cerevisiae), BAIAP2L1 - bai1-associated protein 2-like 1, CAPG - capping protein (actin filament), gelsolin-like, JUN - jun proto-oncogene, SNCA - synuclein, alpha (non a4 component of amyloid precursor), SPIRE1…
GO:0038093	Fc receptor signaling pathway	0.000264	0.00621	2.05	11488	165	918	27	13.1707	[CLEC4D - c-type lectin domain family 4, member d, CLEC4E - c-type lectin domain family 4, member e, PSME2 - proteasome (prosome, macropain) activator subunit 2 (pa28 beta), JUN - jun proto-oncogene, CDC42 - cell division cycle 42, RELA - v-rel avian reticuloendotheliosis viral oncogene homolog a, GRB2 - growth factor receptor-bound protein 2, LYN - v-yes-1 yamaguchi sarcoma viral related oncogen…
GO:0051338	regulation of transferase activity	0.000266	0.00625	1.47	11488	671	918	79	53.7415	[TRIB3 - tribbles homolog 3 (drosophila), MAP3K8 - mitogen-activated protein kinase kinase kinase 8, CDC42 - cell division cycle 42, SOCS1 - suppressor of cytokine signaling 1, IL12B - interleukin 12b (natural killer cell stimulatory factor 2, cytotoxic lymphocyte maturation factor 2, p40), SDC4 - syndecan 4, IL23A - interleukin 23, alpha subunit p19, SLC11A1 - solute carrier family 11 (proton-co…
GO:0045622	regulation of T-helper cell differentiation	0.000267	0.00625	4.35	11488	23	918	8	1.83908	[IL23A - interleukin 23, alpha subunit p19, CCL19 - chemokine (c-c motif) ligand 19, NLRP3 - nlr family, pyrin domain containing 3, IL27 - interleukin 27, RIPK2 - receptor-interacting serine-threonine kinase 2, IL6 - interleukin 6 (interferon, beta 2), IL12B - interleukin 12b (natural killer cell stimulatory factor 2, cytotoxic lymphocyte maturation factor 2, p40), CD80 - cd80 molecule]
GO:0071398	cellular response to fatty acid	0.000267	0.00626	4.35	11488	23	918	8	1.83908	[ZC3H12A - zinc finger ccch-type containing 12a, LDLR - low density lipoprotein receptor, FFAR2 - free fatty acid receptor 2, SRC - v-src avian sarcoma (schmidt-ruppin a-2) viral oncogene homolog, EDN1 - endothelin 1, PTAFR - platelet-activating factor receptor, SREBF1 - sterol regulatory element binding transcription factor 1, PID1 - phosphotyrosine interaction domain containing 1]
GO:0044126	regulation of growth of symbiont in host	0.000269	0.00628	5.78	11488	13	918	6	1.03806	[OSBP - oxysterol binding protein, TNF - tumor necrosis factor, IRF8 - interferon regulatory factor 8, SQSTM1 - sequestosome 1, IL12B - interleukin 12b (natural killer cell stimulatory factor 2, cytotoxic lymphocyte maturation factor 2, p40), IFNG - interferon, gamma]
GO:0071354	cellular response to interleukin-6	0.000269	0.00629	5.78	11488	13	918	6	1.03806	[RELA - v-rel avian reticuloendotheliosis viral oncogene homolog a, HAMP - hepcidin antimicrobial peptide, SBNO2 - strawberry notch homolog 2 (drosophila), NFKB1 - nuclear factor of kappa light polypeptide gene enhancer in b-cells 1, CCL2 - chemokine (c-c motif) ligand 2, PID1 - phosphotyrosine interaction domain containing 1]
GO:0046637	regulation of alpha-beta T cell differentiation	0.00027	0.00629	3.36	11488	41	918	11	3.27381	[IL23A - interleukin 23, alpha subunit p19, CCL19 - chemokine (c-c motif) ligand 19, NLRP3 - nlr family, pyrin domain containing 3, ADA - adenosine deaminase, IL27 - interleukin 27, CD83 - cd83 molecule, RIPK2 - receptor-interacting serine-threonine kinase 2, IL6 - interleukin 6 (interferon, beta 2), IL12B - interleukin 12b (natural killer cell stimulatory factor 2, cytotoxic lymphocyte maturatio…
GO:0032527	protein exit from endoplasmic reticulum	0.000269	0.0063	5.78	11488	13	918	6	1.03806	[HSP90B1 - heat shock protein 90kda beta (grp94), member 1, VCP - valosin containing protein, DERL2 - derlin 2, VIMP - vcp-interacting membrane protein, SEC61B - sec61 beta subunit, NPLOC4 - nuclear protein localization 4 homolog (s. cerevisiae)]
GO:1903034	regulation of response to wounding	0.000272	0.00631	2.4	11488	99	918	19	7.91667	[CEACAM1 - carcinoembryonic antigen-related cell adhesion molecule 1 (biliary glycoprotein), C1QTNF1 - c1q and tumor necrosis factor related protein 1, F12 - coagulation factor xii (hageman factor), SERPING1 - serpin peptidase inhibitor, clade g (c1 inhibitor), member 1, SCARF1 - scavenger receptor class f, member 1, SPP1 - secreted phosphoprotein 1, PLAU - plasminogen activator, urokinase, NFE2L…
GO:0016050	vesicle organization	0.000286	0.00664	1.93	11488	201	918	31	16.0622	[SEC13 - sec13 homolog (s. cerevisiae), SEC24D - sec24 family, member d (s. cerevisiae), VPS37C - vacuolar protein sorting 37 homolog c (s. cerevisiae), ABCA1 - atp-binding cassette, sub-family a (abc1), member 1, SNX10 - sorting nexin 10, SNX8 - sorting nexin 8, CHMP2A - charged multivesicular body protein 2a, TMED2 - transmembrane emp24 domain trafficking protein 2, TMED9 - transmembrane emp24 …
GO:0038094	Fc-gamma receptor signaling pathway	0.00029	0.00672	2.72	11488	69	918	15	5.51471	[HCK - hemopoietic cell kinase, CLEC4E - c-type lectin domain family 4, member e, CLEC4D - c-type lectin domain family 4, member d, CDC42 - cell division cycle 42, MYO1G - myosin ig, PIK3CB - phosphatidylinositol-4,5-bisphosphate 3-kinase, catalytic subunit beta, FCGR2A - fc fragment of igg, low affinity iia, receptor (cd32), GRB2 - growth factor receptor-bound protein 2, FCGR1A - fc fragment of …
GO:0060402	calcium ion transport into cytosol	0.000296	0.00674	3.88	11488	29	918	9	2.31959	[CCL19 - chemokine (c-c motif) ligand 19, MCOLN1 - mucolipin 1, P2RX7 - purinergic receptor p2x, ligand-gated ion channel, 7, ERO1L - ero1-like (s. cerevisiae), CCR7 - chemokine (c-c motif) receptor 7, ADRA1A - adrenoceptor alpha 1a, JPH2 - junctophilin 2, ITPR1 - inositol 1,4,5-trisphosphate receptor, type 1, CCL3 - chemokine (c-c motif) ligand 3]
GO:0045824	negative regulation of innate immune response	0.000296	0.00675	3.88	11488	29	918	9	2.31959	[CEACAM1 - carcinoembryonic antigen-related cell adhesion molecule 1 (biliary glycoprotein), DHX58 - dexh (asp-glu-x-his) box polypeptide 58, IRAK3 - interleukin-1 receptor-associated kinase 3, TNFAIP3 - tumor necrosis factor, alpha-induced protein 3, SERPINB9 - serpin peptidase inhibitor, clade b (ovalbumin), member 9, TRAFD1 - traf-type zinc finger domain containing 1, SERPING1 - serpin peptida…
GO:0043550	regulation of lipid kinase activity	0.000293	0.00676	3.58	11488	35	918	10	2.7933	[CCL19 - chemokine (c-c motif) ligand 19, CCR7 - chemokine (c-c motif) receptor 7, LYN - v-yes-1 yamaguchi sarcoma viral related oncogene homolog, PTK2B - protein tyrosine kinase 2 beta, SRC - v-src avian sarcoma (schmidt-ruppin a-2) viral oncogene homolog, VAC14 - vac14 homolog (s. cerevisiae), CDC42 - cell division cycle 42, FGR - feline gardner-rasheed sarcoma viral oncogene homolog, NOD2 - nu…
GO:0030195	negative regulation of blood coagulation	0.000296	0.00676	3.88	11488	29	918	9	2.31959	[PLAU - plasminogen activator, urokinase, PLAUR - plasminogen activator, urokinase receptor, CEACAM1 - carcinoembryonic antigen-related cell adhesion molecule 1 (biliary glycoprotein), ANXA2 - annexin a2, EDN1 - endothelin 1, C1QTNF1 - c1q and tumor necrosis factor related protein 1, PRKCD - protein kinase c, delta, F12 - coagulation factor xii (hageman factor), SERPING1 - serpin peptidase inhibi…
GO:0046640	regulation of alpha-beta T cell proliferation	0.000295	0.00677	4.87	11488	18	918	7	1.43737	[IL23A - interleukin 23, alpha subunit p19, IRF1 - interferon regulatory factor 1, TNFRSF14 - tumor necrosis factor receptor superfamily, member 14, RIPK2 - receptor-interacting serine-threonine kinase 2, EBI3 - epstein-barr virus induced 3, IL12B - interleukin 12b (natural killer cell stimulatory factor 2, cytotoxic lymphocyte maturation factor 2, p40), CD80 - cd80 molecule]
GO:1900047	negative regulation of hemostasis	0.000296	0.00677	3.88	11488	29	918	9	2.31959	[PLAU - plasminogen activator, urokinase, PLAUR - plasminogen activator, urokinase receptor, CEACAM1 - carcinoembryonic antigen-related cell adhesion molecule 1 (biliary glycoprotein), ANXA2 - annexin a2, EDN1 - endothelin 1, C1QTNF1 - c1q and tumor necrosis factor related protein 1, PRKCD - protein kinase c, delta, F12 - coagulation factor xii (hageman factor), SERPING1 - serpin peptidase inhibi…
GO:0045935	positive regulation of nucleobase-containing compound metabolic process	0.000297	0.00677	1.35	11488	1090	918	118	87.4074	[ELL - elongation factor rna polymerase ii, NDN - necdin, melanoma antigen (mage) family member, PLAC8 - placenta-specific 8, CDC42 - cell division cycle 42, CXCL9 - chemokine (c-x-c motif) ligand 9, ABCA1 - atp-binding cassette, sub-family a (abc1), member 1, RELA - v-rel avian reticuloendotheliosis viral oncogene homolog a, OSM - oncostatin m, ZBTB17 - zinc finger and btb domain containing 17, …
GO:0009226	nucleotide-sugar biosynthetic process	0.000295	0.00678	4.87	11488	18	918	7	1.43737	[AMDHD2 - amidohydrolase domain containing 2, PGM3 - phosphoglucomutase 3, GMPPB - gdp-mannose pyrophosphorylase b, GNPDA1 - glucosamine-6-phosphate deaminase 1, NAGK - n-acetylglucosamine kinase, GNPNAT1 - glucosamine-phosphate n-acetyltransferase 1, UAP1 - udp-n-acteylglucosamine pyrophosphorylase 1]
GO:0002861	regulation of inflammatory response to antigenic stimulus	0.000295	0.0068	4.87	11488	18	918	7	1.43737	[C3 - complement component 3, TNF - tumor necrosis factor, CCR7 - chemokine (c-c motif) receptor 7, FCER1G - fc fragment of ige, high affinity i, receptor for; gamma polypeptide, ZP3 - zona pellucida glycoprotein 3 (sperm receptor), VIMP - vcp-interacting membrane protein, IL12B - interleukin 12b (natural killer cell stimulatory factor 2, cytotoxic lymphocyte maturation factor 2, p40)]
GO:0097066	response to thyroid hormone	0.000295	0.00681	4.87	11488	18	918	7	1.43737	[CTSL - cathepsin l, CTSH - cathepsin h, GBA - glucosidase, beta, acid, ANXA2 - annexin a2, CTSB - cathepsin b, RDX - radixin, CTSS - cathepsin s]
GO:0002863	positive regulation of inflammatory response to antigenic stimulus	0.000309	0.00697	6.95	11488	9	918	5	0.719424	[C3 - complement component 3, TNF - tumor necrosis factor, CCR7 - chemokine (c-c motif) receptor 7, FCER1G - fc fragment of ige, high affinity i, receptor for; gamma polypeptide, ZP3 - zona pellucida glycoprotein 3 (sperm receptor)]
GO:0051649	establishment of localization in cell	0.000307	0.00698	1.36	11488	1080	918	117	86.0294	[SEC13 - sec13 homolog (s. cerevisiae), CDC42 - cell division cycle 42, SPIRE1 - spire actin nucleation factor 1, TRAK1 - trafficking protein, kinesin binding 1, SEC24D - sec24 family, member d (s. cerevisiae), DENND5A - denn/madd domain containing 5a, SEC61B - sec61 beta subunit, ABCA1 - atp-binding cassette, sub-family a (abc1), member 1, SDCBP - syndecan binding protein (syntenin), COPB2 - coa…
GO:0045117	azole transport	0.000309	0.00699	6.95	11488	9	918	5	0.719424	[LYN - v-yes-1 yamaguchi sarcoma viral related oncogene homolog, EDN1 - endothelin 1, CSF2 - colony stimulating factor 2 (granulocyte-macrophage), ADA - adenosine deaminase, SLC19A2 - solute carrier family 19 (thiamine transporter), member 2]
GO:0034975	protein folding in endoplasmic reticulum	0.000309	0.007	6.95	11488	9	918	5	0.719424	[CALR - calreticulin, ERO1L - ero1-like (s. cerevisiae), HSP90B1 - heat shock protein 90kda beta (grp94), member 1, CANX - calnexin, HSPA5 - heat shock 70kda protein 5 (glucose-regulated protein, 78kda)]
GO:0071801	regulation of podosome assembly	0.000309	0.00701	6.95	11488	9	918	5	0.719424	[TNF - tumor necrosis factor, HCK - hemopoietic cell kinase, SRC - v-src avian sarcoma (schmidt-ruppin a-2) viral oncogene homolog, CSF2 - colony stimulating factor 2 (granulocyte-macrophage), FSCN1 - fascin homolog 1, actin-bundling protein (strongylocentrotus purpuratus)]
GO:0002700	regulation of production of molecular mediator of immune response	0.000319	0.00718	2.6	11488	77	918	16	6.15385	[RSAD2 - radical s-adenosyl methionine domain containing 2, FFAR2 - free fatty acid receptor 2, STX4 - syntaxin 4, TNFRSF14 - tumor necrosis factor receptor superfamily, member 14, CD40 - cd40 molecule, tnf receptor superfamily member 5, TNFRSF4 - tumor necrosis factor receptor superfamily, member 4, TNF - tumor necrosis factor, FCER1G - fc fragment of ige, high affinity i, receptor for; gamma po…
GO:0046635	positive regulation of alpha-beta T cell activation	0.00034	0.00765	3.28	11488	42	918	11	3.35366	[IL23A - interleukin 23, alpha subunit p19, CCL19 - chemokine (c-c motif) ligand 19, NLRP3 - nlr family, pyrin domain containing 3, ADA - adenosine deaminase, CD83 - cd83 molecule, RIPK2 - receptor-interacting serine-threonine kinase 2, EBI3 - epstein-barr virus induced 3, IL6 - interleukin 6 (interferon, beta 2), IL12B - interleukin 12b (natural killer cell stimulatory factor 2, cytotoxic lympho…
GO:0010634	positive regulation of epithelial cell migration	0.000343	0.00768	2.68	11488	70	918	15	5.59701	[ZC3H12A - zinc finger ccch-type containing 12a, CTSH - cathepsin h, VEGFA - vascular endothelial growth factor a, JUN - jun proto-oncogene, MET - met proto-oncogene, STAT5A - signal transducer and activator of transcription 5a, NFE2L2 - nuclear factor (erythroid-derived 2)-like 2, PTK2B - protein tyrosine kinase 2 beta, THBS1 - thrombospondin 1, EDN1 - endothelin 1, SRC - v-src avian sarcoma (sc…
GO:0010508	positive regulation of autophagy	0.000343	0.00769	2.68	11488	70	918	15	5.59701	[ZC3H12A - zinc finger ccch-type containing 12a, RALB - v-ral simian leukemia viral oncogene homolog b, GBA - glucosidase, beta, acid, BNIP3L - bcl2/adenovirus e1b 19kda interacting protein 3-like, ATG7 - autophagy related 7, HK2 - hexokinase 2, RIPK2 - receptor-interacting serine-threonine kinase 2, SQSTM1 - sequestosome 1, TICAM1 - toll-like receptor adaptor molecule 1, PIK3CB - phosphatidylino…
GO:2000021	regulation of ion homeostasis	0.000348	0.00778	2.25	11488	117	918	21	9.33333	[P2RX4 - purinergic receptor p2x, ligand-gated ion channel, 4, MCOLN1 - mucolipin 1, CCL19 - chemokine (c-c motif) ligand 19, CCR7 - chemokine (c-c motif) receptor 7, P2RX7 - purinergic receptor p2x, ligand-gated ion channel, 7, SCN1B - sodium channel, voltage-gated, type i, beta subunit, SNCA - synuclein, alpha (non a4 component of amyloid precursor), CXCL9 - chemokine (c-x-c motif) ligand 9, CX…
GO:0071375	cellular response to peptide hormone stimulus	0.000354	0.0079	2.3	11488	109	918	20	8.69565	[TRIB3 - tribbles homolog 3 (drosophila), CEACAM1 - carcinoembryonic antigen-related cell adhesion molecule 1 (biliary glycoprotein), GNG2 - guanine nucleotide binding protein (g protein), gamma 2, STAT1 - signal transducer and activator of transcription 1, 91kda, NFKB1 - nuclear factor of kappa light polypeptide gene enhancer in b-cells 1, CCL2 - chemokine (c-c motif) ligand 2, ASS1 - argininosu…
GO:0050868	negative regulation of T cell activation	0.000361	0.00804	2.78	11488	63	918	14	5.03597	[CEACAM1 - carcinoembryonic antigen-related cell adhesion molecule 1 (biliary glycoprotein), NFKBID - nuclear factor of kappa light polypeptide gene enhancer in b-cells inhibitor, delta, TNFRSF14 - tumor necrosis factor receptor superfamily, member 14, CD274 - cd274 molecule, SDC4 - syndecan 4, HAVCR2 - hepatitis a virus cellular receptor 2, LRRC32 - leucine rich repeat containing 32, IRF1 - inte…
GO:0006687	glycosphingolipid metabolic process	0.000364	0.00811	3.06	11488	49	918	12	3.92157	[NEU1 - sialidase 1 (lysosomal sialidase), CLN3 - ceroid-lipofuscinosis, neuronal 3, GALC - galactosylceramidase, GBA - glucosidase, beta, acid, CTSA - cathepsin a, GBA3 - glucosidase, beta, acid 3, PSAP - prosaposin, GM2A - gm2 ganglioside activator, ASAH1 - n-acylsphingosine amidohydrolase (acid ceramidase) 1, SMPD1 - sphingomyelin phosphodiesterase 1, acid lysosomal, GLTP - glycolipid transfer…
GO:1904950	negative regulation of establishment of protein localization	0.000366	0.00813	2.07	11488	151	918	25	12.0773	[TNFRSF9 - tumor necrosis factor receptor superfamily, member 9, LITAF - lipopolysaccharide-induced tnf factor, RHOQ - ras homolog family member q, PTGER4 - prostaglandin e receptor 4 (subtype ep4), NLRP3 - nlr family, pyrin domain containing 3, PPFIA1 - protein tyrosine phosphatase, receptor type, f polypeptide (ptprf), interacting protein (liprin), alpha 1, PIM3 - pim-3 oncogene, RHBDF2 - rhomb…
GO:1903508	positive regulation of nucleic acid-templated transcription	0.000369	0.00816	1.39	11488	890	918	99	71.223	[ELL - elongation factor rna polymerase ii, NDN - necdin, melanoma antigen (mage) family member, PLAC8 - placenta-specific 8, RELA - v-rel avian reticuloendotheliosis viral oncogene homolog a, OSM - oncostatin m, ZBTB17 - zinc finger and btb domain containing 17, AGRN - agrin, ATF6 - activating transcription factor 6, TBK1 - tank-binding kinase 1, CAMKK2 - calcium/calmodulin-dependent protein kin…
GO:0045893	positive regulation of transcription, DNA-templated	0.000369	0.00817	1.39	11488	890	918	99	71.223	[ELL - elongation factor rna polymerase ii, NDN - necdin, melanoma antigen (mage) family member, PLAC8 - placenta-specific 8, RELA - v-rel avian reticuloendotheliosis viral oncogene homolog a, OSM - oncostatin m, ZBTB17 - zinc finger and btb domain containing 17, AGRN - agrin, ATF6 - activating transcription factor 6, TBK1 - tank-binding kinase 1, CAMKK2 - calcium/calmodulin-dependent protein kin…
GO:0051283	negative regulation of sequestering of calcium ion	0.000372	0.00822	4.17	11488	24	918	8	1.91847	[CCL19 - chemokine (c-c motif) ligand 19, MCOLN1 - mucolipin 1, ERO1L - ero1-like (s. cerevisiae), P2RX7 - purinergic receptor p2x, ligand-gated ion channel, 7, CCR7 - chemokine (c-c motif) receptor 7, ITPR1 - inositol 1,4,5-trisphosphate receptor, type 1, JPH2 - junctophilin 2, CCL3 - chemokine (c-c motif) ligand 3]
GO:0051209	release of sequestered calcium ion into cytosol	0.000372	0.00823	4.17	11488	24	918	8	1.91847	[CCL19 - chemokine (c-c motif) ligand 19, MCOLN1 - mucolipin 1, ERO1L - ero1-like (s. cerevisiae), P2RX7 - purinergic receptor p2x, ligand-gated ion channel, 7, CCR7 - chemokine (c-c motif) receptor 7, ITPR1 - inositol 1,4,5-trisphosphate receptor, type 1, JPH2 - junctophilin 2, CCL3 - chemokine (c-c motif) ligand 3]
GO:0046031	ADP metabolic process	0.000376	0.00826	3.48	11488	36	918	10	2.87356	[PFKFB3 - 6-phosphofructo-2-kinase/fructose-2,6-biphosphatase 3, AK2 - adenylate kinase 2, HK2 - hexokinase 2, AK4 - adenylate kinase 4, AMPD3 - adenosine monophosphate deaminase 3, ENO2 - enolase 2 (gamma, neuronal), PKM - pyruvate kinase, muscle, ADPGK - adp-dependent glucokinase, ALDOA - aldolase a, fructose-bisphosphate, ENO1 - enolase 1, (alpha)]
GO:0042531	positive regulation of tyrosine phosphorylation of STAT protein	0.000376	0.00828	3.48	11488	36	918	10	2.87356	[IL23A - interleukin 23, alpha subunit p19, OSM - oncostatin m, LYN - v-yes-1 yamaguchi sarcoma viral related oncogene homolog, SOCS3 - suppressor of cytokine signaling 3, CSF2 - colony stimulating factor 2 (granulocyte-macrophage), STAT3 - signal transducer and activator of transcription 3 (acute-phase response factor), CD40 - cd40 molecule, tnf receptor superfamily member 5, IL6 - interleukin 6…
GO:0010883	regulation of lipid storage	0.000376	0.00829	3.48	11488	36	918	10	2.87356	[C3 - complement component 3, ZC3H12A - zinc finger ccch-type containing 12a, TNF - tumor necrosis factor, IKBKE - inhibitor of kappa light polypeptide gene enhancer in b-cells, kinase epsilon, HILPDA - hypoxia inducible lipid droplet-associated, NFKBIA - nuclear factor of kappa light polypeptide gene enhancer in b-cells inhibitor, alpha, NFKB1 - nuclear factor of kappa light polypeptide gene enh…
GO:0045834	positive regulation of lipid metabolic process	0.000391	0.00858	2.47	11488	86	918	17	6.88259	[CCL19 - chemokine (c-c motif) ligand 19, CCR7 - chemokine (c-c motif) receptor 7, ZP3 - zona pellucida glycoprotein 3 (sperm receptor), CDC42 - cell division cycle 42, NSMAF - neutral sphingomyelinase (n-smase) activation associated factor, IL1B - interleukin 1, beta, LDLR - low density lipoprotein receptor, TNF - tumor necrosis factor, LYN - v-yes-1 yamaguchi sarcoma viral related oncogene homo…
GO:0071622	regulation of granulocyte chemotaxis	0.000393	0.0086	3.75	11488	30	918	9	2.4	[C3AR1 - complement component 3a receptor 1, IL23A - interleukin 23, alpha subunit p19, CXCL2 - chemokine (c-x-c motif) ligand 2, CCL19 - chemokine (c-c motif) ligand 19, CXCL1 - chemokine (c-x-c motif) ligand 1 (melanoma growth stimulating activity, alpha), CCR7 - chemokine (c-c motif) receptor 7, THBS1 - thrombospondin 1, IL8 - interleukin 8, CCL2 - chemokine (c-c motif) ligand 2]
GO:0051592	response to calcium ion	0.000403	0.00878	2.64	11488	71	918	15	5.68182	[P2RX7 - purinergic receptor p2x, ligand-gated ion channel, 7, JUN - jun proto-oncogene, JUNB - jun b proto-oncogene, SLC25A24 - solute carrier family 25 (mitochondrial carrier; phosphate carrier), member 24, FOSB - fbj murine osteosarcoma viral oncogene homolog b, FOS - fbj murine osteosarcoma viral oncogene homolog, AHCYL1 - adenosylhomocysteinase-like 1, CLIC4 - chloride intracellular channel …
GO:0042102	positive regulation of T cell proliferation	0.000403	0.00879	2.64	11488	71	918	15	5.68182	[CCL19 - chemokine (c-c motif) ligand 19, ZP3 - zona pellucida glycoprotein 3 (sperm receptor), RIPK2 - receptor-interacting serine-threonine kinase 2, EBI3 - epstein-barr virus induced 3, IL1B - interleukin 1, beta, IL12B - interleukin 12b (natural killer cell stimulatory factor 2, cytotoxic lymphocyte maturation factor 2, p40), CD274 - cd274 molecule, HAVCR2 - hepatitis a virus cellular recepto…
GO:0051092	positive regulation of NF-kappaB transcription factor activity	0.000404	0.00879	2.33	11488	102	918	19	8.15451	[S100A12 - s100 calcium binding protein a12, ICAM1 - intercellular adhesion molecule 1, PSMA6 - proteasome (prosome, macropain) subunit, alpha type, 6, NFKB2 - nuclear factor of kappa light polypeptide gene enhancer in b-cells 2 (p49/p100), RIPK2 - receptor-interacting serine-threonine kinase 2, NFKBIA - nuclear factor of kappa light polypeptide gene enhancer in b-cells inhibitor, alpha, NFKB1 - …
GO:0015849	organic acid transport	0.000403	0.00881	2.64	11488	71	918	15	5.68182	[CEACAM1 - carcinoembryonic antigen-related cell adhesion molecule 1 (biliary glycoprotein), SLC6A6 - solute carrier family 6 (neurotransmitter transporter), member 6, AQP9 - aquaporin 9, SLC7A11 - solute carrier family 7 (anionic amino acid transporter light chain, xc- system), member 11, SLC1A3 - solute carrier family 1 (glial high affinity glutamate transporter), member 3, SLC43A2 - solute car…
GO:0022603	regulation of anatomical structure morphogenesis	0.000409	0.00887	1.47	11488	649	918	76	51.7007	[CDC42 - cell division cycle 42, CXCL9 - chemokine (c-x-c motif) ligand 9, RHOQ - ras homolog family member q, SPP1 - secreted phosphoprotein 1, SEMA4A - sema domain, immunoglobulin domain (ig), transmembrane domain (tm) and short cytoplasmic domain, (semaphorin) 4a, PTK2B - protein tyrosine kinase 2 beta, SEMA6A - sema domain, transmembrane domain (tm), and cytoplasmic domain, (semaphorin) 6a, R…
GO:0048869	cellular developmental process	0.000413	0.00896	1.28	11488	1589	918	162	126.562	[BOK - bcl2-related ovarian killer, PLAC8 - placenta-specific 8, HSD17B4 - hydroxysteroid (17-beta) dehydrogenase 4, SPRR1A - small proline-rich protein 1a, CDC42 - cell division cycle 42, PSAP - prosaposin, IER2 - immediate early response 2, IL12B - interleukin 12b (natural killer cell stimulatory factor 2, cytotoxic lymphocyte maturation factor 2, p40), SPP1 - secreted phosphoprotein 1, CLIC4 -…
GO:0042509	regulation of tyrosine phosphorylation of STAT protein	0.000425	0.00919	3.2	11488	43	918	11	3.4375	[IL23A - interleukin 23, alpha subunit p19, OSM - oncostatin m, LYN - v-yes-1 yamaguchi sarcoma viral related oncogene homolog, SOCS3 - suppressor of cytokine signaling 3, CSF2 - colony stimulating factor 2 (granulocyte-macrophage), SOCS1 - suppressor of cytokine signaling 1, STAT3 - signal transducer and activator of transcription 3 (acute-phase response factor), CD40 - cd40 molecule, tnf recept…
GO:0090023	positive regulation of neutrophil chemotaxis	0.000435	0.00934	4.61	11488	19	918	7	1.51844	[C3AR1 - complement component 3a receptor 1, IL23A - interleukin 23, alpha subunit p19, CXCL2 - chemokine (c-x-c motif) ligand 2, CCL19 - chemokine (c-c motif) ligand 19, CXCL1 - chemokine (c-x-c motif) ligand 1 (melanoma growth stimulating activity, alpha), CCR7 - chemokine (c-c motif) receptor 7, IL8 - interleukin 8]
GO:0045807	positive regulation of endocytosis	0.000433	0.00935	2.53	11488	79	918	16	6.32411	[CCL19 - chemokine (c-c motif) ligand 19, FLOT1 - flotillin 1, VEGFA - vascular endothelial growth factor a, RAB21 - rab21, member ras oncogene family, SNCA - synuclein, alpha (non a4 component of amyloid precursor), CCL2 - chemokine (c-c motif) ligand 2, ARF1 - adp-ribosylation factor 1, IL1B - interleukin 1, beta, DLL1 - delta-like 1 (drosophila), C3 - complement component 3, SLC11A1 - solute c…
GO:0036003	positive regulation of transcription from RNA polymerase II promoter in response to stress	0.000435	0.00936	4.61	11488	19	918	7	1.51844	[NFE2L2 - nuclear factor (erythroid-derived 2)-like 2, VEGFA - vascular endothelial growth factor a, HSPA5 - heat shock 70kda protein 5 (glucose-regulated protein, 78kda), ATF6 - activating transcription factor 6, ATF3 - activating transcription factor 3, CEBPB - ccaat/enhancer binding protein (c/ebp), beta, HIF1A - hypoxia inducible factor 1, alpha subunit (basic helix-loop-helix transcription f…
GO:2000403	positive regulation of lymphocyte migration	0.000435	0.00937	4.61	11488	19	918	7	1.51844	[PTK2B - protein tyrosine kinase 2 beta, TNFSF14 - tumor necrosis factor (ligand) superfamily, member 14, TNFRSF14 - tumor necrosis factor receptor superfamily, member 14, CXCL10 - chemokine (c-x-c motif) ligand 10, CCL20 - chemokine (c-c motif) ligand 20, ADAM17 - adam metallopeptidase domain 17, CCL3 - chemokine (c-c motif) ligand 3]
GO:0045624	positive regulation of T-helper cell differentiation	0.000435	0.00939	4.61	11488	19	918	7	1.51844	[IL23A - interleukin 23, alpha subunit p19, CCL19 - chemokine (c-c motif) ligand 19, NLRP3 - nlr family, pyrin domain containing 3, RIPK2 - receptor-interacting serine-threonine kinase 2, IL6 - interleukin 6 (interferon, beta 2), IL12B - interleukin 12b (natural killer cell stimulatory factor 2, cytotoxic lymphocyte maturation factor 2, p40), CD80 - cd80 molecule]
GO:0044144	modulation of growth of symbiont involved in interaction with host	0.000439	0.0094	5.36	11488	14	918	6	1.1194	[OSBP - oxysterol binding protein, TNF - tumor necrosis factor, IRF8 - interferon regulatory factor 8, SQSTM1 - sequestosome 1, IL12B - interleukin 12b (natural killer cell stimulatory factor 2, cytotoxic lymphocyte maturation factor 2, p40), IFNG - interferon, gamma]
GO:0071498	cellular response to fluid shear stress	0.000439	0.00942	5.36	11488	14	918	6	1.1194	[NFE2L2 - nuclear factor (erythroid-derived 2)-like 2, CA2 - carbonic anhydrase ii, PTK2B - protein tyrosine kinase 2 beta, SRC - v-src avian sarcoma (schmidt-ruppin a-2) viral oncogene homolog, PTGS2 - prostaglandin-endoperoxide synthase 2 (prostaglandin g/h synthase and cyclooxygenase), ASS1 - argininosuccinate synthase 1]
GO:0090279	regulation of calcium ion import	0.000444	0.00947	2.85	11488	57	918	13	4.5614	[ZP3 - zona pellucida glycoprotein 3 (sperm receptor), SNCA - synuclein, alpha (non a4 component of amyloid precursor), CXCL9 - chemokine (c-x-c motif) ligand 9, CXCL10 - chemokine (c-x-c motif) ligand 10, CCL2 - chemokine (c-c motif) ligand 2, JPH2 - junctophilin 2, CCL3 - chemokine (c-c motif) ligand 3, SPINK1 - serine peptidase inhibitor, kazal type 1, LYN - v-yes-1 yamaguchi sarcoma viral rel…
GO:0032481	positive regulation of type I interferon production	0.000444	0.00949	2.85	11488	57	918	13	4.5614	[FLOT1 - flotillin 1, DHX58 - dexh (asp-glu-x-his) box polypeptide 58, NFKB2 - nuclear factor of kappa light polypeptide gene enhancer in b-cells 2 (p49/p100), RIPK2 - receptor-interacting serine-threonine kinase 2, NFKB1 - nuclear factor of kappa light polypeptide gene enhancer in b-cells 1, TICAM1 - toll-like receptor adaptor molecule 1, RELA - v-rel avian reticuloendotheliosis viral oncogene h…
GO:0061041	regulation of wound healing	0.000451	0.00958	2.45	11488	87	918	17	6.93878	[CEACAM1 - carcinoembryonic antigen-related cell adhesion molecule 1 (biliary glycoprotein), C1QTNF1 - c1q and tumor necrosis factor related protein 1, F12 - coagulation factor xii (hageman factor), SERPING1 - serpin peptidase inhibitor, clade g (c1 inhibitor), member 1, PLAU - plasminogen activator, urokinase, NFE2L2 - nuclear factor (erythroid-derived 2)-like 2, PLAUR - plasminogen activator, u…
GO:0055085	transmembrane transport	0.00045	0.00959	1.45	11488	672	918	78	53.7931	[KCNK5 - potassium channel, subfamily k, member 5, ATP6V1F - atpase, h+ transporting, lysosomal 14kda, v1 subunit f, SLC6A6 - solute carrier family 6 (neurotransmitter transporter), member 6, ATP2A2 - atpase, ca++ transporting, cardiac muscle, slow twitch 2, TMEM38B - transmembrane protein 38b, SLC12A6 - solute carrier family 12 (potassium/chloride transporter), member 6, SLC31A2 - solute carrier…
GO:0009266	response to temperature stimulus	0.000459	0.00975	2.37	11488	95	918	18	7.59494	[MICB - mhc class i polypeptide-related sequence b, PLAC8 - placenta-specific 8, NFKBIA - nuclear factor of kappa light polypeptide gene enhancer in b-cells inhibitor, alpha, CDKN1A - cyclin-dependent kinase inhibitor 1a (p21, cip1), CXCL10 - chemokine (c-x-c motif) ligand 10, CCL2 - chemokine (c-c motif) ligand 2, MYOF - myoferlin, IL1A - interleukin 1, alpha, FOS - fbj murine osteosarcoma viral…
GO:0030001	metal ion transport	0.000466	0.00987	1.65	11488	348	918	46	27.8788	[KCNK5 - potassium channel, subfamily k, member 5, MCOLN1 - mucolipin 1, ATP6V1F - atpase, h+ transporting, lysosomal 14kda, v1 subunit f, CCR7 - chemokine (c-c motif) receptor 7, MICU1 - mitochondrial calcium uptake 1, ATP2A2 - atpase, ca++ transporting, cardiac muscle, slow twitch 2, COX17 - cox17 cytochrome c oxidase copper chaperone, TMEM38B - transmembrane protein 38b, SCN1B - sodium channel…

## Sheet: DownRegulated_Genes_GOPROCESS
GO Term	Description	P-value	FDR q-value	Enrichment	N	B	n	b	Expected	Genes
GO:0006413	translational initiation	6.59e-10	8.74e-06	3.27	11488	129	898	33	10.0917	[RPL26 - ribosomal protein l26, RPS23 - ribosomal protein s23, EIF3K - eukaryotic translation initiation factor 3, subunit k, RPL22 - ribosomal protein l22, RPS26 - ribosomal protein s26, RPL21 - ribosomal protein l21, RPS17 - ribosomal protein s17, PABPC1 - poly(a) binding protein, cytoplasmic 1, RPL13A - ribosomal protein l13a, RPL17 - ribosomal protein l17, RPS15A - ribosomal protein s15a, MTI…
GO:0006412	translation	9.83e-09	4.34e-05	2.81	11488	164	898	36	12.8114	[RPL26 - ribosomal protein l26, RPS23 - ribosomal protein s23, RPL22 - ribosomal protein l22, RPS26 - ribosomal protein s26, RPL21 - ribosomal protein l21, NOA1 - nitric oxide associated 1, RPS17 - ribosomal protein s17, RPL13A - ribosomal protein l13a, RPS15A - ribosomal protein s15a, RPL17 - ribosomal protein l17, RPS18 - ribosomal protein s18, RPL9 - ribosomal protein l9, RPL7A - ribosomal pro…
GO:0001775	cell activation	8.96e-09	5.94e-05	2.09	11488	391	898	64	30.622	[LAX1 - lymphocyte transmembrane adaptor 1, IL18R1 - interleukin 18 receptor 1, RPL22 - ribosomal protein l22, NCK1 - nck adaptor protein 1, FLT3LG - fms-related tyrosine kinase 3 ligand, SH2D1B - sh2 domain containing 1b, TLR1 - toll-like receptor 1, ZFP36L2 - zfp36 ring finger protein-like 2, AMICA1 - adhesion molecule, interacts with cxadr antigen 1, VAMP2 - vesicle-associated membrane protein…
GO:0043043	peptide biosynthetic process	2.45e-08	8.12e-05	2.67	11488	177	898	37	13.8577	[RPL26 - ribosomal protein l26, RPS23 - ribosomal protein s23, RPL22 - ribosomal protein l22, RPS26 - ribosomal protein s26, RPL21 - ribosomal protein l21, NOA1 - nitric oxide associated 1, RPS17 - ribosomal protein s17, RPS15A - ribosomal protein s15a, RPL13A - ribosomal protein l13a, RPL17 - ribosomal protein l17, RPS18 - ribosomal protein s18, MRPS26 - mitochondrial ribosomal protein s26, RPL9…
GO:0045321	leukocyte activation	7.42e-08	0.000197	2.17	11488	307	898	52	23.9631	[LAX1 - lymphocyte transmembrane adaptor 1, IL18R1 - interleukin 18 receptor 1, RPL22 - ribosomal protein l22, NCK1 - nck adaptor protein 1, FLT3LG - fms-related tyrosine kinase 3 ligand, SH2D1B - sh2 domain containing 1b, TLR1 - toll-like receptor 1, ZFP36L2 - zfp36 ring finger protein-like 2, AMICA1 - adhesion molecule, interacts with cxadr antigen 1, VAMP2 - vesicle-associated membrane protein…
GO:0043604	amide biosynthetic process	2.85e-07	0.000629	2.35	11488	218	898	40	17.0213	[ST6GALNAC2 - st6 (alpha-n-acetyl-neuraminyl-2,3-beta-galactosyl-1,3)-n-acetylgalactosaminide alpha-2,6-sialyltransferase 2, RPL26 - ribosomal protein l26, RPS23 - ribosomal protein s23, RPL22 - ribosomal protein l22, RPS26 - ribosomal protein s26, RPL21 - ribosomal protein l21, NOA1 - nitric oxide associated 1, RPS17 - ribosomal protein s17, RPL13A - ribosomal protein l13a, RPL17 - ribosomal pro…
GO:0000184	nuclear-transcribed mRNA catabolic process, nonsense-mediated decay	5.13e-07	0.00085	2.99	11488	107	898	25	8.3612	[RPL26 - ribosomal protein l26, RPS23 - ribosomal protein s23, RPL22 - ribosomal protein l22, RPS26 - ribosomal protein s26, RPL21 - ribosomal protein l21, RPS17 - ribosomal protein s17, RPL17 - ribosomal protein l17, RPS15A - ribosomal protein s15a, RPL13A - ribosomal protein l13a, PABPC1 - poly(a) binding protein, cytoplasmic 1, RPS18 - ribosomal protein s18, RPL9 - ribosomal protein l9, RPL7A …
GO:0006614	SRP-dependent cotranslational protein targeting to membrane	4.68e-07	0.000886	3.27	11488	86	898	22	6.72783	[RPL26 - ribosomal protein l26, RPSA - ribosomal protein sa, RPS23 - ribosomal protein s23, RPS5 - ribosomal protein s5, RPL22 - ribosomal protein l22, RPS26 - ribosomal protein s26, RPL21 - ribosomal protein l21, RPS17 - ribosomal protein s17, RPS15A - ribosomal protein s15a, RPL13A - ribosomal protein l13a, RPL17 - ribosomal protein l17, RPS18 - ribosomal protein s18, RPL10A - ribosomal protein…
GO:0045047	protein targeting to ER	6.09e-07	0.000898	3.13	11488	94	898	23	7.34824	[RPL26 - ribosomal protein l26, RPSA - ribosomal protein sa, RPS23 - ribosomal protein s23, RPS5 - ribosomal protein s5, RPL22 - ribosomal protein l22, RPS26 - ribosomal protein s26, RPL21 - ribosomal protein l21, RPS17 - ribosomal protein s17, RPL13A - ribosomal protein l13a, RPS15A - ribosomal protein s15a, RPL17 - ribosomal protein l17, RPS18 - ribosomal protein s18, RPL10A - ribosomal protein…
GO:0002376	immune system process	7.2e-07	0.000955	1.47	11488	1243	898	143	97.2789	[LAX1 - lymphocyte transmembrane adaptor 1, IL18R1 - interleukin 18 receptor 1, EXOSC9 - exosome component 9, NCK1 - nck adaptor protein 1, FLT3LG - fms-related tyrosine kinase 3 ligand, SH2D1B - sh2 domain containing 1b, ZFP36L2 - zfp36 ring finger protein-like 2, WASF2 - was protein family, member 2, CD79A - cd79a molecule, immunoglobulin-associated alpha, DOCK8 - dedicator of cytokinesis 8, PY…
GO:0072599	establishment of protein localization to endoplasmic reticulum	1.1e-06	0.00133	3.03	11488	97	898	23	7.59076	[RPL26 - ribosomal protein l26, RPS23 - ribosomal protein s23, RPSA - ribosomal protein sa, RPS5 - ribosomal protein s5, RPL22 - ribosomal protein l22, RPS26 - ribosomal protein s26, RPL21 - ribosomal protein l21, RPS17 - ribosomal protein s17, RPL13A - ribosomal protein l13a, RPS15A - ribosomal protein s15a, RPL17 - ribosomal protein l17, RPS18 - ribosomal protein s18, RPL10A - ribosomal protein…
GO:0006613	cotranslational protein targeting to membrane	1.33e-06	0.00147	3.09	11488	91	898	22	7.11974	[RPL26 - ribosomal protein l26, RPSA - ribosomal protein sa, RPS23 - ribosomal protein s23, RPS5 - ribosomal protein s5, RPL22 - ribosomal protein l22, RPS26 - ribosomal protein s26, RPL21 - ribosomal protein l21, RPS17 - ribosomal protein s17, RPL13A - ribosomal protein l13a, RPS15A - ribosomal protein s15a, RPL17 - ribosomal protein l17, RPS18 - ribosomal protein s18, RPL10A - ribosomal protein…
GO:0070972	protein localization to endoplasmic reticulum	2.34e-06	0.00239	2.91	11488	101	898	23	7.90378	[RPL26 - ribosomal protein l26, RPS23 - ribosomal protein s23, RPSA - ribosomal protein sa, RPS5 - ribosomal protein s5, RPL22 - ribosomal protein l22, RPS26 - ribosomal protein s26, RPL21 - ribosomal protein l21, RPS17 - ribosomal protein s17, RPL13A - ribosomal protein l13a, RPS15A - ribosomal protein s15a, RPL17 - ribosomal protein l17, RPS18 - ribosomal protein s18, RPL10A - ribosomal protein…
GO:0000956	nuclear-transcribed mRNA catabolic process	2.82e-06	0.00267	2.39	11488	171	898	32	13.3891	[RPL26 - ribosomal protein l26, RPS23 - ribosomal protein s23, EXOSC9 - exosome component 9, RPL22 - ribosomal protein l22, RPS26 - ribosomal protein s26, RPL21 - ribosomal protein l21, PAPD5 - pap associated domain containing 5, RPS17 - ribosomal protein s17, RPS15A - ribosomal protein s15a, RPL13A - ribosomal protein l13a, PABPC1 - poly(a) binding protein, cytoplasmic 1, RPL17 - ribosomal prote…
GO:0006402	mRNA catabolic process	3.17e-06	0.0028	2.35	11488	180	898	33	14.0426	[RPL26 - ribosomal protein l26, RPS23 - ribosomal protein s23, EXOSC9 - exosome component 9, RPL22 - ribosomal protein l22, RPS26 - ribosomal protein s26, RPL21 - ribosomal protein l21, PAPD5 - pap associated domain containing 5, RPS17 - ribosomal protein s17, PABPC1 - poly(a) binding protein, cytoplasmic 1, RPL13A - ribosomal protein l13a, RPS15A - ribosomal protein s15a, RPL17 - ribosomal prote…
GO:0046649	lymphocyte activation	3.75e-06	0.00292	2.11	11488	249	898	41	19.4313	[LAX1 - lymphocyte transmembrane adaptor 1, IL18R1 - interleukin 18 receptor 1, RPL22 - ribosomal protein l22, BCL11B - b-cell cll/lymphoma 11b (zinc finger protein), NCK1 - nck adaptor protein 1, CMTM7 - cklf-like marvel transmembrane domain containing 7, CLEC7A - c-type lectin domain family 7, member a, FLT3LG - fms-related tyrosine kinase 3 ligand, CCND3 - cyclin d3, CD8A - cd8a molecule, SLAM…
GO:0006518	peptide metabolic process	3.57e-06	0.00296	2.07	11488	266	898	43	20.7729	[RPL26 - ribosomal protein l26, RPS23 - ribosomal protein s23, RPL22 - ribosomal protein l22, EEF1G - eukaryotic translation elongation factor 1 gamma, LTA4H - leukotriene a4 hydrolase, RPS26 - ribosomal protein s26, RPL21 - ribosomal protein l21, NOA1 - nitric oxide associated 1, RPS17 - ribosomal protein s17, RPL13A - ribosomal protein l13a, RPL17 - ribosomal protein l17, RPS15A - ribosomal pro…
GO:0019083	viral transcription	4.73e-06	0.00348	2.8	11488	105	898	23	8.21429	[RPL26 - ribosomal protein l26, RPS23 - ribosomal protein s23, RPSA - ribosomal protein sa, RPS5 - ribosomal protein s5, RPL22 - ribosomal protein l22, RPS26 - ribosomal protein s26, RPL21 - ribosomal protein l21, RPS17 - ribosomal protein s17, RPL13A - ribosomal protein l13a, RPS15A - ribosomal protein s15a, RPL17 - ribosomal protein l17, RPS18 - ribosomal protein s18, RPL10A - ribosomal protein…
GO:0006401	RNA catabolic process	1.25e-05	0.00827	2.17	11488	200	898	34	15.6682	[RPL26 - ribosomal protein l26, RPS23 - ribosomal protein s23, EXOSC9 - exosome component 9, RPL22 - ribosomal protein l22, RPS26 - ribosomal protein s26, PAPD5 - pap associated domain containing 5, RPL21 - ribosomal protein l21, RPS17 - ribosomal protein s17, PABPC1 - poly(a) binding protein, cytoplasmic 1, RPL13A - ribosomal protein l13a, RPL17 - ribosomal protein l17, RPS15A - ribosomal protei…
GO:0034622	cellular macromolecular complex assembly	1.2e-05	0.00836	1.67	11488	536	898	70	41.9162	[EIF3K - eukaryotic translation initiation factor 3, subunit k, HIST1H2BC - histone cluster 1, h2bc, LUC7L3 - luc7-like 3 (s. cerevisiae), NCK1 - nck adaptor protein 1, SF3A3 - splicing factor 3a, subunit 3, 60kda, MSRB2 - methionine sulfoxide reductase b2, XPC - xeroderma pigmentosum, complementation group c, GSN - gelsolin, ADRB2 - adrenoceptor beta 2, surface, NDUFA2 - nadh dehydrogenase (ubiq…
