# Supplementary material for: Deciphering the genetic control of gene expression following Mycobacterium leprae antigen stimulation
Source: PLoS Genet. 2017 Aug 9;13(8):e1006952. doi: 10.1371/journal.pgen.1006952 (PMC5565194; doi:10.1371/journal.pgen.1006952)
Supplement: S3 Table — (XLSX) [file pgen.1006952.s009.xlsx]

## Sheet: Caption
S3 Table. Identified cis-eQTL at an FDR of 5%. Only the best cis-eQTL per gene are shown. Slope and Pvalue: Slope of the linear regression obtained for the genotype-gene expression association and its corresponding Pvalue; NS: non-stimulated cells; ST: stimulated cells;

## Sheet: NS
Ensembl_ID	HUGO_ID	Gene_chr	SNP_ID	SNP_chr	SNP_position	Slope	Pvalue
ENSG00000005020	SKAP2	7	rs2030137	7	26953564	-0.25929	3.60444e-08
ENSG00000011405	PIK3C2A	11	rs34941502	11	17155432	0.110508	7.53244e-08
ENSG00000049247	UTS2	1	rs10489448	1	7961801	-0.56075	3.98835e-10
ENSG00000053770	AP5M1	14	rs7158671	14	57636495	0.124821	1.63883e-05
ENSG00000063854	HAGH	16	rs116869551	16	1876619	-0.201474	1.20503e-06
ENSG00000064490	RFXANK	19	rs78678276	19	19300294	-0.183852	2.47922e-06
ENSG00000064547	LPAR2	19	rs4808974	19	19733964	0.172355	6.37221e-07
ENSG00000066294	CD84	1	rs1604783	1	160568692	0.074755	1.25388e-05
ENSG00000066379	ZNRD1	6	rs140679941	6	29999009	-0.173665	2.67462e-05
ENSG00000072210	ALDH3A2	17	rs7216938	17	19495926	0.076004	5.00856e-06
ENSG00000073605	GSDMB	17	rs8071789	17	38006333	0.230993	1.81686e-06
ENSG00000074590	NUAK1	12	rs10746054	12	106460001	0.146129	3.68899e-06
ENSG00000078124	ACER3	11	rs10899324	11	76644935	0.0813198	1.33304e-05
ENSG00000078177	N4BP2	4	rs1533064	4	40116367	0.119188	1.1231e-05
ENSG00000078674	PCM1	8	rs56019217	8	17715052	0.177848	1.42495e-10
ENSG00000083828	ZNF586	19	rs10424027	19	58354536	-0.157814	6.8817e-06
ENSG00000085978	ATG16L1	2	rs6759896	2	234210972	-0.105776	5.21233e-06
ENSG00000088826	SMOX	20	rs6107422	20	4177978	-0.0733375	2.11861e-05
ENSG00000089505	CMTM1	16	rs8060922	16	66598583	-0.141684	7.18122e-07
ENSG00000090382	LYZ	12	rs12812860	12	69746671	0.585283	4.45665e-10
ENSG00000092020	PPP2R3C	14	rs11851907	14	35590821	0.172235	6.68355e-06
ENSG00000100055	CYTH4	22	rs3203726	22	37710013	0.148803	1.11867e-05
ENSG00000100109	TFIP11	22	rs12628373	22	26904541	0.148201	1.27361e-05
ENSG00000100266	PACSIN2	22	rs4822241	22	43369349	-0.180434	9.2248e-06
ENSG00000100288	CHKB	22	rs2269386	22	51009212	-0.352955	2.34549e-11
ENSG00000100483	VCPKMT	14	rs150326308	14	50543094	0.140457	4.0693e-06
ENSG00000100664	EIF5	14	rs7154682	14	103786210	0.0695936	2.82708e-05
ENSG00000103313	MEFV	16	rs401298	16	3280974	-0.111304	7.22901e-06
ENSG00000104231	ZFAND1	8	rs188805868	8	82597250	0.119175	1.34099e-06
ENSG00000104714	ERICH1	8	rs117239736	8	649784	-0.190455	4.89556e-08
ENSG00000105053	VRK3	19	rs34349285	19	50556936	0.0851521	1.65052e-05
ENSG00000107263	RAPGEF1	9	rs11243506	9	134625387	0.155304	4.9415e-06
ENSG00000107771	CCSER2	10	rs4934005	10	86091356	0.376359	4.87296e-06
ENSG00000108384	RAD51C	17	rs35732484	17	56732744	-0.136464	1.03848e-05
ENSG00000108946	PRKAR1A	17	rs138486234	17	66492118	0.707036	7.65702e-06
ENSG00000109762	SNX25	4	rs3108267	4	186120559	-0.0899129	5.29899e-07
ENSG00000110931	CAMKK2	12	rs2686341	12	121684286	-0.18267	2.32262e-07
ENSG00000111666	CHPT1	12	rs71440841	12	102091379	-0.202884	5.77944e-06
ENSG00000112110	MRPL18	6	rs138252308	6	160129102	-0.167269	2.46079e-05
ENSG00000115165	CYTIP	2	rs16826008	2	158278634	-0.337053	3.37475e-07
ENSG00000115523	GNLY	2	rs2366805	2	85915027	0.282779	2.76905e-05
ENSG00000115687	PASK	2	rs6437234	2	242019288	0.653546	3.24983e-13
ENSG00000115919	KYNU	2	rs6732911	2	143675703	-0.731055	3.6638e-13
ENSG00000116698	SMG7	1	rs2275675	1	183439483	-0.179234	2.16449e-08
ENSG00000117174	ZNHIT6	1	rs12061951	1	86081453	-0.0947109	1.46169e-07
ENSG00000117533	VAMP4	1	rs74883952	1	171700047	-0.248415	1.24257e-09
ENSG00000117569	PTBP2	1	rs11801192	1	97212469	0.105722	2.38591e-05
ENSG00000119383	PPP2R4	9	rs7861663	9	131880946	-0.0562247	2.74316e-05
ENSG00000120008	WDR11	10	rs7080550	10	122633607	0.0933337	2.10263e-05
ENSG00000120696	KBTBD7	13	rs7332415	13	41688557	-0.0836293	7.40308e-06
ENSG00000121578	B4GALT4	3	rs4687843	3	118961002	-0.100166	9.84253e-06
ENSG00000122643	NT5C3A	7	rs10244526	7	33116046	0.23952	6.0703e-06
ENSG00000122873	CISD1	10	rs11510150	10	60004235	0.186658	6.39568e-07
ENSG00000124275	MTRR	5	rs162031	5	7880287	0.172304	4.89988e-09
ENSG00000124279	FASTKD3	5	rs2624237	5	7926944	0.0788662	1.04882e-06
ENSG00000125107	CNOT1	16	rs9931052	16	58682119	0.0799066	2.89653e-06
ENSG00000125753	VASP	19	rs4803827	19	46033382	0.123313	1.92187e-05
ENSG00000125827	TMX4	20	rs4142417	20	7959508	-0.152913	2.48218e-06
ENSG00000125863	MKKS	20	rs112041309	20	10353335	-0.0899729	2.95736e-05
ENSG00000126773	PCNXL4	14	rs1254028	14	60632246	-0.134813	1.03186e-05
ENSG00000127328	RAB3IP	12	rs775451	12	70112707	0.0762462	2.48748e-05
ENSG00000129007	CALML4	15	rs17317291	15	68519814	-0.10061	8.49176e-06
ENSG00000129103	SUMF2	7	rs6970842	7	56077235	-0.103946	6.28773e-06
ENSG00000130177	CDC16	13	rs7332374	13	114995733	-0.282482	4.72732e-08
ENSG00000131943	C19orf12	19	rs11084140	19	30215351	0.114026	1.98663e-05
ENSG00000132383	RPA1	17	rs17734	17	1801144	-0.120698	2.33318e-05
ENSG00000134086	VHL	3	rs1678593	3	10186447	0.382975	7.79581e-09
ENSG00000134184	GSTM1	1	MERGED_DEL_2_4670	1	110223001	0.185682	2.72541e-07
ENSG00000135047	CTSL	9	rs3118865	9	90324077	0.285685	3.62105e-06
ENSG00000136003	ISCU	12	rs2287555	12	108956433	0.12933	1.95589e-05
ENSG00000136280	CCM2	7	rs3823866	7	45116885	-0.291316	6.73998e-08
ENSG00000136717	BIN1	2	rs73955803	2	127831641	0.335632	2.3742e-07
ENSG00000136840	ST6GALNAC4	9	rs10819317	9	130668957	0.113447	5.93582e-06
ENSG00000137764	MAP2K5	15	rs8023643	15	67918893	0.0681291	1.11717e-05
ENSG00000138801	PAPSS1	4	rs2726178	4	108633985	-0.218373	1.25488e-08
ENSG00000140092	FBLN5	14	rs2267990	14	92339908	0.213693	2.35856e-10
ENSG00000140105	WARS	14	rs56293834	14	100818286	0.461797	7.77266e-08
ENSG00000140553	UNC45A	15	rs34864584	15	91570627	-0.139093	1.75445e-05
ENSG00000143756	FBXO28	1	rs12563153	1	224339647	-0.0723831	2.49637e-05
ENSG00000145247	OCIAD2	4	rs7685360	4	48887090	0.184031	2.35395e-05
ENSG00000145425	RPS3A	4	rs7441414	4	151950678	-0.119851	3.25982e-06
ENSG00000146574	CCZ1B	7	rs2711231	7	6863474	0.426385	3.84064e-12
ENSG00000146833	TRIM4	7	rs4727438	7	99486238	-0.098957	1.21705e-05
ENSG00000153283	CD96	3	rs9858544	3	111330922	-0.198621	1.44942e-05
ENSG00000154710	RABGEF1	7	rs62466849	7	66224692	0.122856	3.13319e-06
ENSG00000155096	AZIN1	8	rs2570939	8	103857042	0.299846	8.09846e-10
ENSG00000157954	WIPI2	7	rs9987030	7	5260487	-0.120108	1.16634e-06
ENSG00000158373	HIST1H2BD	6	rs806973	6	26148326	0.411784	6.92653e-10
ENSG00000158747	NBL1	1	rs2854108	1	19973920	0.142548	3.54339e-06
ENSG00000158773	USF1	1	rs2516839	1	161013121	-0.159414	1.98519e-05
ENSG00000158985	CDC42SE2	5	rs78623258	5	130628103	0.185499	2.92401e-08
ENSG00000159461	AMFR	16	rs2587867	16	56404011	-0.193894	4.15332e-12
ENSG00000159692	CTBP1	4	rs3894353	4	1234028	-0.110274	6.7571e-07
ENSG00000160305	DIP2A	21	rs2073379	21	47863025	-0.0543284	6.39789e-06
ENSG00000160310	PRMT2	21	rs9637225	21	47960654	-0.247553	1.94342e-07
ENSG00000160856	FCRL3	1	rs6681271	1	157666644	-0.192237	9.01319e-08
ENSG00000162747	FCGR3B	1	rs78967774	1	161607533	0.912488	7.1087e-06
ENSG00000164308	ERAP2	5	rs1559356	5	96226729	0.250769	1.0014e-12
ENSG00000164754	RAD21	8	rs11786873	8	117851021	-0.251502	1.3816e-05
ENSG00000164978	NUDT2	9	rs11790980	9	34285586	0.229199	2.87066e-09
ENSG00000166164	BRD7	16	rs1894942	16	50400087	-0.10297	8.08969e-06
ENSG00000167772	ANGPTL4	19	rs12976739	19	8461663	-0.232398	7.55183e-06
ENSG00000168066	SF1	11	rs523200	11	64532579	0.117191	2.56852e-06
ENSG00000168229	PTGDR	14	rs1950746	14	52646729	0.123334	5.3192e-07
ENSG00000168958	MFF	2	rs7560053	2	228220769	0.262049	1.92721e-13
ENSG00000168995	SIGLEC7	19	rs17801681	19	51676649	-0.128019	3.90655e-06
ENSG00000169045	HNRNPH1	5	rs6876679	5	179053197	0.271712	2.38655e-07
ENSG00000170889	RPS9	19	rs12978577	19	54717624	0.1635	6.78871e-07
ENSG00000171298	GAA	17	rs12950270	17	78146429	0.141707	2.66194e-05
ENSG00000172175	MALT1	18	rs7505392	18	56244632	-0.0626324	6.35809e-06
ENSG00000172243	CLEC7A	12	rs11053628	12	10289164	0.205443	4.11353e-08
ENSG00000172322	CLEC12A	12	rs1969785	12	10114620	-0.517577	4.94387e-09
ENSG00000172349	IL16	15	rs11072996	15	81529410	0.261693	1.00356e-05
ENSG00000172954	LCLAT1	2	rs829570	2	30684289	-0.11968	4.17099e-07
ENSG00000173918	C1QTNF1	17	rs6501273	17	76962364	-0.058983	2.89746e-05
ENSG00000174106	LEMD3	12	rs2133323	12	65577453	0.227925	7.11624e-09
ENSG00000174652	ZNF266	19	rs74342016	19	9509445	-0.184289	1.28485e-10
ENSG00000174697	LEP	7	rs359652	7	127976595	-0.163133	1.31671e-05
ENSG00000175334	BANF1	11	rs559078	11	65723626	0.0815171	1.12123e-05
ENSG00000176371	ZSCAN2	15	rs139119645	15	85215843	0.0850123	1.61588e-06
ENSG00000179598	PLD6	17	rs8069259	17	17022841	-0.220044	4.65499e-10
ENSG00000182362	YBEY	21	rs2839198	21	47708254	0.213302	1.02244e-05
ENSG00000182400	TRAPPC6B	14	rs8009933	14	39600212	-0.110713	1.10776e-06
ENSG00000183891	TTC32	2	rs35957485	2	20090677	-0.301262	6.31112e-12
ENSG00000185880	TRIM69	15	rs7172357	15	45064507	-0.0860352	2.69486e-05
ENSG00000186184	POLR1D	13	rs3759430	13	28193422	-0.230653	8.87545e-12
ENSG00000188846	RPL14	3	rs9874006	3	40471596	-0.475058	1.37439e-12
ENSG00000188906	LRRK2	12	rs2404581	12	40639901	0.145301	1.01615e-05
ENSG00000196636	ACN9	7	rs78913221	7	96764891	-0.293102	1.97809e-07
ENSG00000196683	TOMM7	7	rs2270107	7	22862183	0.11338	9.65395e-07
ENSG00000197119	SLC25A29	14	rs11557209	14	100772672	-0.284066	3.65663e-07
ENSG00000197958	RPL12	9	rs77450241	9	130193628	-0.148182	3.30297e-08
ENSG00000197971	MBP	18	rs12969118	18	74769971	0.401407	1.70863e-06
ENSG00000198178	CLEC4C	12	rs11055602	12	7904111	-0.120055	5.9529e-09
ENSG00000198467	TPM2	9	rs2295797	9	35722282	0.233493	5.66132e-06
ENSG00000204387	C6orf48	6	rs117331931	6	31802684	0.233343	5.98657e-14
ENSG00000205809	KLRC2	12	rs2617156	12	10536879	-0.296087	5.09994e-06
ENSG00000206503	HLA-A	6	rs114061669	6	29914533	-0.176387	7.17552e-06
ENSG00000213366	GSTM2	1	rs661417	1	110194909	-0.245565	4.07024e-07
ENSG00000239672	NME1	17	rs28597917	17	49221807	-0.0739696	3.91196e-07
ENSG00000239713	APOBEC3G	22	rs17537581	22	39482809	0.369748	9.95143e-06
ENSG00000240065	PSMB9	6	rs116120163	6	32840638	-0.15713	6.53932e-06
ENSG00000244754	N4BP2L2	13	rs9595881	13	33165500	-0.343253	2.64441e-11
ENSG00000263002	ZNF234	19	rs7248054	19	44655537	-0.11404	2.17067e-09
ENSG00000001561	ENPP4	6	rs2206968	6	46087905	-0.10398	7.68545e-06
ENSG00000002549	LAP3	4	rs4235387	4	17569327	0.209789	1.37705e-05
ENSG00000003249	DBNDD1	16	rs62052218	16	90007808	-0.426766	2.35564e-10
ENSG00000006007	GDE1	16	rs12924965	16	19510132	0.218817	3.33896e-11
ENSG00000007129	CEACAM21	19	rs12983999	19	42070528	-0.0804931	1.43119e-05
ENSG00000010278	CD9	12	rs2109120	12	6252186	0.306858	1.02427e-05
ENSG00000013573	DDX11	12	rs7966523	12	31254959	0.159814	2.34438e-08
ENSG00000014164	ZC3H3	8	rs13257849	8	144560049	0.153102	8.36204e-06
ENSG00000026297	RNASET2	6	rs4710160	6	167409241	0.180923	7.0981e-06
ENSG00000035115	SH3YL1	2	rs79154857	2	293688	0.187937	3.73379e-06
ENSG00000036448	MYOM2	8	rs147884694	8	2079757	-1.35104	2.90332e-10
ENSG00000037474	NSUN2	5	rs2303711	5	6602544	0.168714	4.97119e-12
ENSG00000043514	TRIT1	1	rs10789049	1	40343432	-0.130272	1.87246e-05
ENSG00000055483	USP36	17	rs8079047	17	76775673	-0.339334	1.50001e-08
ENSG00000058600	POLR3E	16	rs7764	16	22345191	0.151468	1.86567e-06
ENSG00000063180	CA11	19	rs2617803	19	49113029	-0.131814	2.2917e-05
ENSG00000064419	TNPO3	7	rs73240324	7	128654656	0.167719	2.11257e-10
ENSG00000065135	GNAI3	1	rs1889470	1	110141421	0.242755	6.11316e-08
ENSG00000065268	WDR18	19	rs2301810	19	984533	0.257064	1.23871e-09
ENSG00000066027	PPP2R5A	1	rs116128776	1	212429402	-0.168138	1.11264e-05
ENSG00000067182	TNFRSF1A	12	rs7315789	12	6389976	-0.167027	8.60932e-07
ENSG00000068097	HEATR6	17	rs7223281	17	58172447	-0.228334	7.36759e-10
ENSG00000070614	NDST1	5	rs10074650	5	149897291	0.14436	7.71786e-07
ENSG00000070731	ST6GALNAC2	17	rs12943923	17	74645681	-0.340477	9.98289e-06
ENSG00000071894	CPSF1	8	rs56293142	8	145623446	0.242581	1.07512e-11
ENSG00000073584	SMARCE1	17	rs9630729	17	38807861	0.154446	5.67795e-06
ENSG00000074800	ENO1	1	rs6675298	1	9011046	0.289724	4.50127e-06
ENSG00000077097	TOP2B	3	rs10433573	3	25706277	0.0816595	8.27852e-06
ENSG00000079257	LXN	3	rs16829365	3	158447129	-0.111153	2.41282e-05
ENSG00000085871	MGST2	4	rs8192013	4	140588391	-0.209876	7.49728e-07
ENSG00000086288	NME8	7	rs2722313	7	37902489	0.214871	7.45121e-07
ENSG00000087253	LPCAT2	16	rs7186553	16	55604471	-0.355629	3.3207e-06
ENSG00000087365	SF3B2	11	rs7946140	11	65785211	0.181636	5.96073e-09
ENSG00000088833	NSFL1C	20	rs2317651	20	1414025	0.133209	2.53447e-05
ENSG00000089876	DHX32	10	rs10751535	10	127589202	0.116205	5.79182e-07
ENSG00000092094	OSGEP	14	rs57905147	14	20934321	0.14976	2.90286e-05
ENSG00000093000	NUP50	22	rs226735	22	45538442	-0.275753	1.4451e-11
ENSG00000095539	SEMA4G	10	rs807027	10	102764607	-0.100111	5.61514e-06
ENSG00000099974	DDTL	22	rs5751777	22	24267047	0.101467	1.06576e-06
ENSG00000099977	DDT	22	rs5760104	22	24249573	-0.223871	9.73473e-08
ENSG00000099995	SF3A1	22	rs5749099	22	30849451	0.0947389	2.29811e-05
ENSG00000100034	PPM1F	22	rs9610691	22	22305021	0.293568	2.1155e-06
ENSG00000100092	SH3BP1	22	rs62236663	22	38059224	0.157907	2.21314e-06
ENSG00000100347	SAMM50	22	rs11704562	22	44346128	-0.143793	1.53649e-05
ENSG00000100376	FAM118A	22	rs136592	22	45783722	-0.41593	7.31568e-12
ENSG00000100815	TRIP11	14	rs11845664	14	92509009	-0.11949	6.40667e-06
ENSG00000100890	KIAA0391	14	rs7145883	14	35528819	-0.169603	2.2979e-05
ENSG00000101290	CDS2	20	rs75994745	20	5149064	0.25596	2.05677e-06
ENSG00000101639	CEP192	18	rs556536	18	13065484	0.195895	7.03496e-07
ENSG00000103196	CRISPLD2	16	rs8057431	16	84839954	-0.455722	2.98971e-06
ENSG00000103257	SLC7A5	16	rs6540085	16	87852975	0.224911	1.11067e-05
ENSG00000103479	RBL2	16	rs12708938	16	53538021	0.201576	4.07353e-06
ENSG00000103489	XYLT1	16	rs146670294	16	17477825	0.231494	1.03931e-05
ENSG00000104497	SNX16	8	rs57750343	8	82761251	0.103133	3.63691e-06
ENSG00000104728	ARHGEF10	8	rs74362557	8	1803848	-0.876866	7.63596e-18
ENSG00000104756	KCTD9	8	rs7839060	8	25353179	0.0727994	9.47012e-06
ENSG00000105136	ZNF419	19	rs62126217	19	58011006	-0.152485	1.53217e-06
ENSG00000105483	CARD8	19	rs7508437	19	48718027	0.339078	2.17133e-12
ENSG00000105499	PLA2G4C	19	rs412631	19	48607170	-0.284788	4.87693e-06
ENSG00000105726	ATP13A1	19	rs58434384	19	19786099	-0.272035	1.36164e-06
ENSG00000106105	GARS	7	rs8192496	7	30705105	-0.13139	2.36151e-05
ENSG00000106366	SERPINE1	7	rs73178549	7	100790839	-0.28493	5.49898e-06
ENSG00000106479	ZNF862	7	rs855650	7	149449706	-0.0907172	2.15596e-05
ENSG00000107937	GTPBP4	10	rs7094331	10	1022816	0.225759	5.42158e-12
ENSG00000107968	MAP3K8	10	rs1619939	10	30647549	0.243412	2.39646e-05
ENSG00000108064	TFAM	10	rs16912188	10	60148751	0.411741	8.34911e-13
ENSG00000108523	RNF167	17	rs238243	17	4849635	0.317905	5.18839e-13
ENSG00000108592	FTSJ3	17	rs2727325	17	61922330	-0.0794631	1.62556e-05
ENSG00000109272	PF4V1	4	rs941758	4	74718941	0.216349	3.40291e-07
ENSG00000109501	WFS1	4	rs6848000	4	6339382	-0.180219	2.52742e-06
ENSG00000109743	BST1	4	rs34559912	4	15730146	0.130589	3.08771e-06
ENSG00000110628	SLC22A18	11	rs11024580	11	2939126	0.163757	5.39569e-06
ENSG00000110665	C11orf21	11	rs800133	11	2391704	0.129154	5.31742e-06
ENSG00000110852	CLEC2B	12	rs2539933	12	10005780	0.471475	8.4065e-13
ENSG00000110871	COQ5	12	rs4238069	12	120875105	-0.150293	1.09636e-06
ENSG00000110880	CORO1C	12	rs1549087	12	109201326	-0.200715	1.86723e-08
ENSG00000110906	KCTD10	12	rs6663	12	109886603	-0.224297	1.80982e-07
ENSG00000111328	CDK2AP1	12	rs10444439	12	123766437	-0.289263	3.13122e-08
ENSG00000111671	SPSB2	12	rs2071074	12	7025763	-0.390798	1.56705e-10
ENSG00000111863	ADTRP	6	rs2235426	6	11720271	0.122303	1.39354e-06
ENSG00000111912	NCOA7	6	rs1544293	6	126175085	0.186862	7.95046e-07
ENSG00000112343	TRIM38	6	rs9358891	6	25903014	-0.170943	2.95407e-06
ENSG00000113971	NPHP3	3	rs56214742	3	132436513	0.183465	3.88731e-08
ENSG00000114742	WDR48	3	rs4267596	3	39046361	-0.256987	7.76986e-12
ENSG00000114770	ABCC5	3	rs11926572	3	183742328	0.142131	6.43783e-08
ENSG00000115750	TAF1B	2	rs2884174	2	10020659	0.0696792	8.68878e-06
ENSG00000116221	MRPL37	1	rs6693202	1	54669984	0.150775	7.11295e-09
ENSG00000116299	KIAA1324	1	rs682288	1	109723640	-0.462186	1.94296e-08
ENSG00000116688	MFN2	1	rs3088064	1	12072518	0.143452	1.07354e-05
ENSG00000116791	CRYZ	1	rs7555459	1	75273706	0.144432	1.78112e-08
ENSG00000116857	TMEM9	1	rs4915486	1	201110963	-0.186264	2.16344e-07
ENSG00000118197	DDX59	1	rs7520407	1	200655728	0.129725	1.05381e-07
ENSG00000118217	ATF6	1	rs12402256	1	161771172	-0.220228	6.89083e-07
ENSG00000118507	AKAP7	6	rs7754788	6	131505531	-0.186448	1.03578e-05
ENSG00000119878	CRIPT	2	rs6544906	2	46863872	-0.262982	2.66837e-09
ENSG00000120675	DNAJC15	13	rs11617079	13	43597865	0.203466	6.58575e-06
ENSG00000120915	EPHX2	8	rs4149257	8	27399704	-0.150226	1.46281e-05
ENSG00000121281	ADCY7	16	rs72786282	16	50375841	-0.167952	2.03724e-08
ENSG00000122417	ODF2L	1	rs17129078	1	86815303	-0.138151	2.72448e-06
ENSG00000123179	EBPL	13	rs1407636	13	50333882	0.201489	6.91331e-06
ENSG00000123219	CENPK	5	rs37252	5	64922347	0.249134	7.43223e-09
ENSG00000123427	METTL21B	12	rs10431505	12	58178589	-0.124701	7.85885e-06
ENSG00000124212	PTGIS	20	rs235006	20	48225358	0.0639513	9.77346e-06
ENSG00000124357	NAGK	2	rs11676435	2	71293277	0.271558	6.37837e-06
ENSG00000124570	SERPINB6	6	rs11242810	6	2937347	0.207673	4.40936e-06
ENSG00000124587	PEX6	6	rs9471968	6	42905235	-0.233168	7.24733e-08
ENSG00000125814	NAPB	20	rs78588741	20	23342798	-0.1807	7.05222e-06
ENSG00000125826	RBCK1	20	rs6139109	20	391025	-0.23947	6.64281e-08
ENSG00000127220	ABHD8	19	rs11880549	19	17397479	-0.173319	4.90299e-06
ENSG00000127337	YEATS4	12	rs315145	12	69794086	0.123104	2.32514e-05
ENSG00000127952	STYXL1	7	rs41299460	7	75600951	-0.142341	2.81791e-05
ENSG00000128191	DGCR8	22	rs182767203	22	20118640	-0.205127	1.31346e-06
ENSG00000128534	LSM8	7	rs992035	7	117828003	0.0769289	8.31245e-06
ENSG00000129295	LRRC6	8	rs10110735	8	133725549	0.412323	3.49824e-11
ENSG00000129933	MAU2	19	rs7247263	19	19432811	-0.15886	4.28443e-09
ENSG00000130193	THEM6	8	rs7812623	8	143845449	-0.293214	1.1987e-05
ENSG00000130312	MRPL34	19	rs28717004	19	17426050	-0.163894	1.34248e-05
ENSG00000130595	TNNT3	11	rs8181564	11	1959707	0.195026	1.8627e-07
ENSG00000131148	EMC8	16	rs375100	16	85793898	-0.108366	5.70334e-07
ENSG00000131238	PPT1	1	rs12074195	1	40573134	-0.515054	1.51581e-06
ENSG00000133704	IPO8	12	rs12812492	12	30817694	0.376454	2.97391e-21
ENSG00000133731	IMPA1	8	rs3735700	8	82634408	0.283178	1.57234e-07
ENSG00000134202	GSTM3	1	rs10776699	1	110263086	-0.176241	1.38077e-05
ENSG00000134758	RNF138	18	rs73415858	18	29682644	0.342724	6.77724e-10
ENSG00000134809	TIMM10	11	rs2729381	11	57309640	-0.368318	3.92975e-07
ENSG00000134864	GGACT	13	rs3825501	13	101240865	-0.262781	6.24813e-10
ENSG00000135457	TFCP2	12	rs7134695	12	51502791	-0.140619	1.68977e-06
ENSG00000135541	AHI1	6	rs6908428	6	135793706	0.134564	1.83231e-06
ENSG00000135778	NTPCR	1	rs743198	1	233086882	-0.228613	1.19537e-08
ENSG00000135919	SERPINE2	2	rs920251	2	224892945	0.199767	1.96276e-05
ENSG00000136045	PWP1	12	rs10861771	12	108120460	-0.104986	1.53978e-05
ENSG00000136240	KDELR2	7	rs7783398	7	6528309	0.222355	2.39954e-06
ENSG00000136856	SLC2A8	9	rs6478776	9	130198866	0.161668	6.84332e-06
ENSG00000137106	GRHPR	9	rs10973326	9	37419497	-0.190725	4.8802e-10
ENSG00000137265	IRF4	6	rs74746812	6	393359	-0.180712	1.58291e-07
ENSG00000137331	IER3	6	rs114680917	6	30749712	0.294661	2.10134e-06
ENSG00000138182	KIF20B	10	rs10881647	10	91490360	-0.0868029	2.33572e-05
ENSG00000138207	RBP4	10	rs192336785	10	95283887	-0.0918936	2.82525e-05
ENSG00000138376	BARD1	2	rs11890571	2	215631541	-0.103378	5.73393e-06
ENSG00000138381	ASNSD1	2	rs6726636	2	190517821	0.293336	4.91225e-07
ENSG00000139714	MORN3	12	rs2309142	12	122113494	-0.0913647	9.27789e-06
ENSG00000139899	CBLN3	14	rs4344657	14	24899364	-0.169577	2.73673e-06
ENSG00000140400	MAN2C1	15	rs11637068	15	75743002	-0.185573	1.26534e-06
ENSG00000140876	NUDT7	16	rs8055407	16	77753969	-0.0903254	1.61654e-05
ENSG00000141030	COPS3	17	rs1736215	17	17132202	-0.142513	5.8876e-07
ENSG00000141179	PCTP	17	rs2912553	17	53838522	-0.335505	2.22682e-08
ENSG00000141232	TOB1	17	rs12946082	17	48921219	0.136893	8.30815e-06
ENSG00000141560	FN3KRP	17	rs3748812	17	80680589	0.24585	1.34947e-10
ENSG00000141698	NT5C3B	17	rs60588087	17	39982432	0.232601	3.25092e-10
ENSG00000142102	ATHL1	11	rs2242565	11	295343	-0.422636	1.93044e-09
ENSG00000143162	CREG1	1	rs7514148	1	167530458	-0.205345	2.62329e-05
ENSG00000143198	MGST3	1	rs4147592	1	165600146	0.215066	5.49787e-08
ENSG00000143387	CTSK	1	rs12725667	1	150766070	0.150173	2.81074e-07
ENSG00000143569	UBAP2L	1	rs1986709	1	154224512	-0.194077	4.33287e-06
ENSG00000143878	RHOB	2	rs1985318	2	20611675	-0.301764	8.3362e-06
ENSG00000144040	SFXN5	2	rs73943036	2	73234332	0.0954161	2.39314e-05
ENSG00000144115	THNSL2	2	rs13008732	2	88528771	-0.227235	2.87454e-07
ENSG00000144559	TAMM41	3	rs6442289	3	11850367	-0.229242	1.97582e-06
ENSG00000144566	RAB5A	3	rs12639027	3	20055430	0.180811	4.577e-06
ENSG00000144597	EAF1	3	rs62242152	3	15447598	-0.155753	4.65417e-07
ENSG00000144867	SRPRB	3	rs3811659	3	133544008	0.164225	5.8929e-06
ENSG00000145214	DGKQ	4	rs3733349	4	954311	-0.263217	3.75542e-09
ENSG00000145495	MARCH6	5	rs6887666	5	10356885	-0.25082	1.78372e-08
ENSG00000146285	SCML4	6	rs9285394	6	108051572	0.132049	7.11019e-06
ENSG00000147471	PROSC	8	rs10955033	8	37646666	-0.10363	1.24374e-05
ENSG00000147813	NAPRT	8	rs1809148	8	144663075	0.343078	4.41907e-11
ENSG00000148344	PTGES	9	rs11792434	9	132530384	0.682151	1.90821e-07
ENSG00000148384	INPP5E	9	rs35763810	9	139323799	0.162078	8.7588e-07
ENSG00000148572	NRBF2	10	rs1533068	10	64892167	0.237607	1.65421e-07
ENSG00000149679	CABLES2	20	rs13044138	20	60960021	-0.101034	2.06282e-06
ENSG00000152219	ARL14EP	11	rs654669	11	30250568	0.20644	5.34676e-09
ENSG00000152778	IFIT5	10	rs10887957	10	91175968	-0.158938	1.65967e-05
ENSG00000154319	FAM167A	8	rs2280805	8	11363784	-0.115116	1.17988e-06
ENSG00000154781	CCDC174	3	rs74641136	3	14690438	0.175515	1.87323e-05
ENSG00000155158	TTC39B	9	rs10961960	9	15291358	0.235751	3.96266e-06
ENSG00000156261	CCT8	21	rs2070611	21	30445774	-0.211457	1.86561e-10
ENSG00000158156	XKR8	1	rs12031718	1	28291363	-0.189042	2.74266e-06
ENSG00000158604	TMED4	7	rs77276890	7	44626107	0.14207	1.32352e-05
ENSG00000158825	CDA	1	rs146352929	1	20926140	-0.518596	2.3811e-08
ENSG00000158869	FCER1G	1	rs4233366	1	161159147	-0.352429	3.00387e-06
ENSG00000159214	CCDC24	1	rs12403025	1	44457215	0.154141	3.27683e-09
ENSG00000159231	CBR3	21	rs12151967	21	37483754	0.118364	8.39921e-07
ENSG00000159337	PLA2G4D	15	rs654527	15	42434505	0.0745775	5.66563e-06
ENSG00000159496	RGL4	22	rs9620303	22	24005829	0.234591	8.73278e-06
ENSG00000159579	RSPRY1	16	rs735046	16	57172333	-0.265211	2.48142e-06
ENSG00000160094	ZNF362	1	rs4132073	1	33723211	-0.133564	3.90002e-06
ENSG00000160185	UBASH3A	21	rs2839513	21	43852355	0.172636	1.37836e-06
ENSG00000160213	CSTB	21	rs35285321	21	45201832	0.394487	7.22509e-10
ENSG00000160226	C21orf2	21	rs56040242	21	45766944	-0.21779	8.62559e-08
ENSG00000160408	ST6GALNAC6	9	rs10819317	9	130668957	0.173608	1.46391e-08
ENSG00000162994	CLHC1	2	rs57681837	2	55466229	-0.204555	7.8022e-10
ENSG00000163945	UVSSA	4	rs144186803	4	1264513	-0.172551	5.9349e-06
ENSG00000163993	S100P	4	rs3822263	4	6697673	-1.6806	4.65221e-12
ENSG00000164535	DAGLB	7	rs836562	7	6451235	0.223907	2.13477e-07
ENSG00000164880	INTS1	7	rs4720789	7	1504976	0.135245	9.53773e-06
ENSG00000165983	PTER	10	rs3087659	10	16554723	-0.284516	3.86795e-18
ENSG00000166002	SMCO4	11	rs2399673	11	93272186	0.411231	2.38028e-06
ENSG00000166189	HPS6	10	rs7086516	10	103805076	0.170777	1.20572e-05
ENSG00000166387	PPFIBP2	11	rs11041430	11	7557650	-0.329276	2.41835e-05
ENSG00000166394	CYB5R2	11	rs11606689	11	7685101	-0.222465	1.68868e-06
ENSG00000166451	CENPN	16	rs74248230	16	81023665	-0.188218	2.3504e-06
ENSG00000166825	ANPEP	15	rs71405666	15	90356511	0.342896	5.8133e-09
ENSG00000166831	RBPMS2	15	rs2171180	15	65095307	0.352987	5.93552e-08
ENSG00000166847	DCTN5	16	rs26760	16	23680286	-0.20136	5.42632e-10
ENSG00000166888	STAT6	12	rs324019	12	57486647	0.234819	9.56806e-10
ENSG00000166896	XRCC6BP1	12	rs10431506	12	58311524	0.216155	1.05161e-08
ENSG00000166923	GREM1	15	rs62001854	15	32965362	-0.0914817	1.22228e-05
ENSG00000166938	DIS3L	15	rs4776774	15	66572692	-0.273393	3.52661e-07
ENSG00000167034	NKX3-1	8	rs6999833	8	23454413	0.313623	5.08592e-07
ENSG00000167232	ZNF91	19	rs444547	19	23479836	-0.335464	1.35812e-08
ENSG00000167261	DPEP2	16	rs255053	16	68020492	-0.22639	1.26154e-05
ENSG00000167515	TRAPPC2L	16	rs187306376	16	88929637	0.284246	6.7816e-06
ENSG00000167528	ZNF641	12	rs2932101	12	48665070	-0.23075	1.14479e-08
ENSG00000167766	ZNF83	19	rs112485438	19	53121838	-0.222283	1.54081e-08
ENSG00000168071	CCDC88B	11	rs61886887	11	64120451	0.135755	8.59763e-06
ENSG00000168411	RFWD3	16	rs12149960	16	74625065	-0.217233	7.92713e-09
ENSG00000168528	SERINC2	1	rs76987937	1	31851953	-0.132996	1.66667e-05
ENSG00000168672	FAM84B	8	rs12550442	8	127520375	0.223874	9.79404e-07
ENSG00000168903	BTNL3	5	rs72494581	5	180430797	-0.305741	3.71319e-07
ENSG00000169413	RNASE6	14	rs7151941	14	21178387	0.624111	2.00881e-08
ENSG00000169826	CSGALNACT2	10	rs1317214	10	43733531	-0.165986	9.93044e-11
ENSG00000169871	TRIM56	7	rs142588334	7	100783623	-0.180603	1.4137e-05
ENSG00000170293	CMTM8	3	rs17029172	3	32345039	0.362373	9.06306e-08
ENSG00000170448	NFXL1	4	rs10938499	4	47848377	-0.691077	2.3179e-09
ENSG00000170915	PAQR8	6	rs614570	6	52319251	-0.142215	3.62263e-06
ENSG00000171130	ATP6V0E2	7	rs4348397	7	149579787	0.218296	1.78416e-05
ENSG00000171488	LRRC8C	1	rs7517627	1	90161356	-0.121722	1.24524e-05
ENSG00000171763	SPATA5L1	15	rs1719238	15	45594766	0.148703	3.15045e-07
ENSG00000171860	C3AR1	12	rs2072448	12	8210697	-0.504144	2.02222e-08
ENSG00000171984	C20orf196	20	rs6038297	20	5814001	-0.145069	2.81332e-06
ENSG00000172543	CTSW	11	rs583887	11	65644027	-0.343262	1.49872e-07
ENSG00000172765	TMCC1	3	rs62265587	3	129549218	-0.191251	3.92873e-08
ENSG00000173209	AHSA2	2	rs1621048	2	61364216	0.294746	3.10282e-11
ENSG00000173230	GOLGB1	3	rs9968051	3	121384081	0.507126	3.34958e-11
ENSG00000173915	USMG5	10	rs61869825	10	105073070	-0.585163	7.13877e-10
ENSG00000174780	SRP72	4	rs66599079	4	57348905	0.110992	6.57954e-06
ENSG00000174871	CNIH2	11	rs1783730	11	66069218	0.0743124	2.80217e-05
ENSG00000175155	YPEL2	17	rs7223146	17	57482182	0.170556	3.20032e-06
ENSG00000175348	TMEM9B	11	rs2252102	11	8998158	0.171403	1.64825e-09
ENSG00000175826	CTDNEP1	17	rs2654185	17	7183362	-0.107212	6.03717e-06
ENSG00000176148	TCP11L1	11	rs35691126	11	33059843	0.100297	5.66246e-07
ENSG00000176393	RNPEP	1	rs4950752	1	201956427	-0.170612	7.33183e-07
ENSG00000176715	ACSF3	16	rs3785414	16	89250399	-0.39535	1.00962e-13
ENSG00000177370	TIMM22	17	rs3744750	17	907315	0.194313	2.31978e-05
ENSG00000177697	CD151	11	rs6597977	11	834802	-0.428456	3.01316e-08
ENSG00000177963	RIC8A	11	rs3830001	11	247200	0.0978025	3.12107e-06
ENSG00000178685	PARP10	8	rs6990361	8	144987221	0.278192	7.26319e-06
ENSG00000178988	MRFAP1L1	4	rs12696692	4	6735941	-0.161968	1.12587e-05
ENSG00000179029	TMEM107	17	rs8066513	17	8066441	0.343355	4.01095e-08
ENSG00000179344	HLA-DQB1	6	rs9273559	6	32628967	-0.362125	5.15171e-11
ENSG00000179886	TIGD5	8	rs3210186	8	144682311	-0.118523	1.2399e-06
ENSG00000180917	CMTR2	16	rs140329675	16	71339132	-0.155228	2.01708e-05
ENSG00000181007	ZFP82	19	rs2967434	19	37007542	-0.087596	7.84669e-07
ENSG00000181029	TRAPPC5	19	rs17159840	19	7758194	-0.225605	2.04857e-05
ENSG00000181274	FRAT2	10	rs10882900	10	99100432	-0.172081	6.73448e-06
ENSG00000181830	SLC35C1	11	rs56131686	11	45831957	-0.114686	3.40971e-06
ENSG00000182253	SYNM	15	rs8028199	15	99644796	0.366517	6.36735e-06
ENSG00000182534	MXRA7	17	rs62085145	17	74700126	-0.181419	1.87995e-06
ENSG00000182782	HCAR2	12	rs118091133	12	123200527	-0.339504	1.79841e-05
ENSG00000182871	COL18A1	21	rs9983797	21	46916699	0.234872	1.10824e-05
ENSG00000182903	ZNF721	4	rs13102358	4	475468	0.257857	3.04591e-07
ENSG00000183617	MRPL54	19	rs7260448	19	3759088	0.193723	1.36042e-05
ENSG00000183688	FAM101B	17	rs60738764	17	210385	0.194663	2.38709e-05
ENSG00000184752	NDUFA12	12	rs10859822	12	95396906	-0.339752	9.14663e-07
ENSG00000184903	IMMP2L	7	rs4730488	7	111166165	0.0940159	1.01578e-05
ENSG00000184939	ZFP90	16	rs1645923	16	68581051	-0.25214	6.63472e-08
ENSG00000185838	GNB1L	22	rs73148920	22	19783906	-0.145911	4.43646e-06
ENSG00000186166	CCDC84	11	rs73559119	11	118879824	-0.163694	2.47795e-05
ENSG00000186468	RPS23	5	rs4703878	5	81550741	-0.40049	1.34177e-07
ENSG00000186652	PRG2	11	rs3741089	11	57156438	-0.122507	1.09878e-05
ENSG00000187624	C17orf97	17	rs10747213	17	273752	-0.546507	9.30317e-12
ENSG00000188056	TREML4	6	rs56111159	6	41192671	0.132301	3.32038e-06
ENSG00000188321	ZNF559	19	rs62104842	19	9461966	0.19512	3.52173e-07
ENSG00000189144	ZNF573	19	rs112570636	19	38255337	0.091694	1.17217e-05
ENSG00000196126	HLA-DRB1	6	rs9271221	6	32579363	1.38768	3.04238e-16
ENSG00000196743	GM2A	5	rs72794132	5	150618993	-0.270222	3.45582e-10
ENSG00000196912	ANKRD36B	2	rs148431318	2	98151710	-0.259901	6.6406e-07
ENSG00000197363	ZNF517	8	rs10090907	8	145958008	0.141489	1.04516e-06
ENSG00000197563	PIGN	18	rs75889550	18	59867101	-0.169252	1.20419e-06
ENSG00000197728	RPS26	12	rs10876864	12	56401085	1.41458	1.65562e-11
ENSG00000197860	SGTB	5	rs37252	5	64922347	0.109295	4.26283e-07
ENSG00000197930	ERO1L	14	rs2025138	14	53164631	-0.28605	5.82246e-06
ENSG00000198502	HLA-DRB5	6	rs113888484	6	32498134	1.82154	1.56582e-14
ENSG00000198563	DDX39B	6	rs2255798	6	31521302	0.119623	2.35725e-05
ENSG00000198816	ZNF358	19	rs77174612	19	7539784	0.141946	1.91387e-05
ENSG00000198843	SELT	3	rs12330655	3	150270077	0.154907	1.72109e-08
ENSG00000203896	LIME1	20	rs932826	20	62380516	-0.214742	3.28659e-07
ENSG00000204525	HLA-C	6	rs114279122	6	31239057	1.02723	4.61997e-11
ENSG00000204822	MRPL53	2	rs3755448	2	74740961	0.209877	1.18661e-08
ENSG00000205078	SYCE1L	16	rs17713016	16	77329233	-0.0701983	9.57873e-06
ENSG00000205560	CPT1B	22	rs762676	22	51017794	0.246441	3.19552e-12
ENSG00000213221	DNLZ	9	rs78503878	9	139250046	-0.604924	1.29917e-09
ENSG00000213462	ERV3-1	7	rs67529730	7	64537021	-0.128564	3.55071e-07
ENSG00000213551	DNAJC9	10	rs113370867	10	75105712	-0.134383	2.86206e-06
ENSG00000213760	ATP6V1G2	6	rs2523504	6	31510858	-0.102114	8.84522e-07
ENSG00000213949	ITGA1	5	rs183013	5	52006802	0.110638	4.33822e-08
ENSG00000214309	MBLAC1	7	rs13236456	7	99675558	-0.0785653	2.65025e-05
ENSG00000214530	STARD10	11	rs7946861	11	72557986	-0.17365	1.85477e-06
ENSG00000214753	HNRNPUL2	11	rs78389153	11	62555692	0.420509	3.50831e-09
ENSG00000214941	ZSWIM7	17	rs2779210	17	15875147	-0.415804	7.48983e-11
ENSG00000215440	NPEPL1	20	rs436778	20	57306696	-0.231115	1.43768e-07
ENSG00000223865	HLA-DPB1	6	rs116712283	6	33049565	-0.177246	1.70449e-05
ENSG00000239282	GATSL3	22	rs5753092	22	30755168	0.143437	1.78438e-06
ENSG00000254415	SIGLEC14	19	MERGED_DEL_2_98507	19	52133651	1.67549	2.71546e-08
ENSG00000255398	HCAR3	12	rs118091133	12	123200527	-0.498946	1.85379e-09
ENSG00000258839	MC1R	16	rs139108058	16	89974662	-0.273989	6.512e-06

## Sheet: ST
Ensembl_ID	HUGO_ID	Gene_chr	SNP_ID	SNP_chr	SNP_position	Slope	Pvalue
ENSG00000005020	SKAP2	7	rs150391390	7	27046699	-0.160554	1.42188e-07
ENSG00000011405	PIK3C2A	11	rs492263	11	17212066	0.14107	3.55565e-08
ENSG00000049247	UTS2	1	rs10489448	1	7961801	-0.415568	1.0009e-09
ENSG00000064490	RFXANK	19	rs78678276	19	19300294	-0.159641	1.448e-06
ENSG00000064666	CNN2	19	rs10419707	19	1038445	-0.273256	8.54485e-08
ENSG00000078674	PCM1	8	rs34695266	8	17816097	0.124283	5.51725e-06
ENSG00000090382	LYZ	12	rs590681	12	69752436	0.457018	6.62644e-06
ENSG00000091073	DTX2	7	rs80058120	7	76084361	-0.178137	1.54815e-05
ENSG00000100109	TFIP11	22	rs12628373	22	26904541	0.215224	6.85849e-06
ENSG00000100266	PACSIN2	22	rs4822241	22	43369349	-0.200118	1.33004e-05
ENSG00000100288	CHKB	22	rs6010016	22	51022569	-0.233078	8.48732e-07
ENSG00000100422	CERK	22	rs2080581	22	47130078	-0.119564	3.06554e-06
ENSG00000102921	N4BP1	16	rs1106386	16	48593065	0.122861	5.84258e-07
ENSG00000103313	MEFV	16	rs1076572	16	3230588	-0.15982	1.18514e-06
ENSG00000104714	ERICH1	8	rs4735895	8	600729	0.112861	5.69832e-07
ENSG00000105053	VRK3	19	rs35607889	19	50556950	0.103881	5.69165e-06
ENSG00000108384	RAD51C	17	rs35732484	17	56732744	-0.172717	1.35218e-06
ENSG00000108946	PRKAR1A	17	rs138486234	17	66492118	0.721374	1.14418e-06
ENSG00000109861	CTSC	11	rs9804609	11	88100191	-0.291088	1.30422e-05
ENSG00000110931	CAMKK2	12	rs2686341	12	121684286	-0.326696	4.76372e-09
ENSG00000111666	CHPT1	12	rs2559851	12	102092989	-0.236694	4.10312e-07
ENSG00000112110	MRPL18	6	rs138252308	6	160129102	-0.216501	1.46799e-07
ENSG00000114544	SLC41A3	3	rs7609604	3	125735175	-0.116254	2.71576e-07
ENSG00000115687	PASK	2	rs10187363	2	242053823	0.320541	1.08856e-06
ENSG00000115919	KYNU	2	rs6732911	2	143675703	-0.371639	4.12194e-09
ENSG00000116698	SMG7	1	rs2702180	1	183517971	0.258237	1.33411e-07
ENSG00000117533	VAMP4	1	rs12125429	1	171651153	-0.179592	1.55748e-06
ENSG00000118785	SPP1	4	rs7688308	4	88806945	0.904949	1.0241e-05
ENSG00000120008	WDR11	10	rs7080550	10	122633607	0.123431	5.98079e-08
ENSG00000122873	CISD1	10	rs11510150	10	60004235	0.196376	2.90322e-07
ENSG00000124243	BCAS4	20	rs6126087	20	49362264	-0.149706	1.24526e-05
ENSG00000124275	MTRR	5	rs8659	5	7900833	0.156294	3.78386e-08
ENSG00000125753	VASP	19	rs11879934	19	46045905	0.174176	4.01702e-09
ENSG00000130177	CDC16	13	rs9590405	13	114999838	-0.203388	1.34494e-07
ENSG00000133818	RRAS2	11	rs6486194	11	14446161	0.0986812	4.61876e-06
ENSG00000134086	VHL	3	rs1681668	3	10192709	0.476313	1.95075e-08
ENSG00000135269	TES	7	rs1918911	7	115906748	-0.0996934	8.82507e-07
ENSG00000136003	ISCU	12	rs12367378	12	108935460	0.137581	6.67812e-06
ENSG00000136280	CCM2	7	rs10951791	7	45073890	-0.220741	5.16523e-06
ENSG00000139343	SNRPF	12	rs7969165	12	96189292	0.150808	7.85325e-07
ENSG00000143119	CD53	1	rs931547	1	111417446	-0.173254	9.94564e-07
ENSG00000143756	FBXO28	1	rs55664906	1	224355682	-0.110448	1.13608e-06
ENSG00000146574	CCZ1B	7	rs4720686	7	6868354	0.351733	1.30632e-09
ENSG00000154710	RABGEF1	7	rs62466849	7	66224692	0.167807	2.30759e-07
ENSG00000155096	AZIN1	8	rs2513918	8	103833156	0.276083	1.32457e-08
ENSG00000158373	HIST1H2BD	6	rs72834694	6	26145158	0.291575	1.27612e-07
ENSG00000158773	USF1	1	rs3829791	1	161023353	-0.197392	3.35815e-06
ENSG00000158985	CDC42SE2	5	rs78623258	5	130628103	0.147664	4.64368e-06
ENSG00000159461	AMFR	16	rs7205545	16	56381312	-0.175753	5.89837e-08
ENSG00000160856	FCRL3	1	rs6681271	1	157666644	-0.210918	8.67507e-09
ENSG00000163468	CCT3	1	rs12022657	1	156314147	0.0765989	1.65652e-05
ENSG00000163923	RPL39L	3	rs4686456	3	186857721	0.229973	1.38119e-06
ENSG00000164307	ERAP1	5	rs26499	5	96132343	0.0603073	3.24005e-06
ENSG00000164308	ERAP2	5	rs12655858	5	96223045	0.220913	4.54893e-09
ENSG00000164978	NUDT2	9	rs62556649	9	34344568	0.155311	7.29284e-06
ENSG00000166164	BRD7	16	rs1894942	16	50400087	-0.0966029	5.47255e-06
ENSG00000166797	FAM96A	15	rs12708480	15	64369998	-0.145982	1.50341e-05
ENSG00000166927	MS4A7	11	rs4938941	11	60173360	-0.255022	3.21786e-06
ENSG00000166928	MS4A14	11	rs7944025	11	60142538	-0.241168	7.79207e-06
ENSG00000168066	SF1	11	rs78837954	11	64590217	-0.113911	1.24283e-05
ENSG00000168958	MFF	2	rs12478005	2	228220528	-0.212465	9.77522e-13
ENSG00000170889	RPS9	19	rs255774	19	54723355	0.165627	1.36126e-07
ENSG00000172243	CLEC7A	12	rs11053628	12	10289164	0.140459	1.88965e-06
ENSG00000174106	LEMD3	12	rs56776666	12	65545176	0.16546	6.83534e-06
ENSG00000174652	ZNF266	19	rs8109962	19	9522388	-0.170338	3.67541e-11
ENSG00000175895	PLEKHF2	8	rs10956941	8	96194737	0.14197	1.1703e-06
ENSG00000182117	NOP10	15	rs58401365	15	34639904	-0.156567	1.36954e-05
ENSG00000182400	TRAPPC6B	14	rs12891258	14	39608892	0.0893705	1.33312e-05
ENSG00000186184	POLR1D	13	rs3759430	13	28193422	-0.135941	1.98364e-06
ENSG00000186866	POFUT2	21	rs7509664	21	46699095	-0.125774	8.23727e-06
ENSG00000188372	ZP3	7	rs6966715	7	76062644	-0.488382	3.19003e-07
ENSG00000188676	IDO2	8	rs2729474	8	39844522	0.255099	1.17438e-05
ENSG00000188846	RPL14	3	rs6801859	3	40493218	0.421997	1.81461e-08
ENSG00000196683	TOMM7	7	rs4722188	7	22860211	0.187546	2.42083e-07
ENSG00000196776	CD47	3	rs56297124	3	107758491	0.0707702	1.06444e-05
ENSG00000197119	SLC25A29	14	rs11557209	14	100772672	-0.244733	4.85565e-06
ENSG00000197142	ACSL5	10	rs11195938	10	114142060	0.20128	4.7863e-10
ENSG00000197345	MRPL21	11	rs36042748	11	68729054	0.17386	3.60291e-07
ENSG00000198015	MRPL42	12	rs4761726	12	93885045	-0.0891708	1.0107e-05
ENSG00000198467	TPM2	9	rs35656035	9	35700825	0.173876	7.0638e-07
ENSG00000204387	C6orf48	6	rs117331931	6	31802684	0.186492	1.42304e-08
ENSG00000213366	GSTM2	1	rs182902643	1	110225432	-0.35994	4.3518e-07
ENSG00000244754	N4BP2L2	13	rs10083285	13	33131342	-0.21824	7.86311e-08
ENSG00000002549	LAP3	4	rs12233712	4	17570063	0.345823	6.31606e-06
ENSG00000003249	DBNDD1	16	rs62054580	16	90079569	-0.19414	8.23864e-06
ENSG00000004864	SLC25A13	7	rs2002810	7	95980004	0.185941	1.58053e-07
ENSG00000019169	MARCO	2	rs11694929	2	119668226	-0.263152	3.09296e-06
ENSG00000027847	B4GALT7	5	rs28742937	5	177031954	-0.202168	5.53019e-07
ENSG00000036448	MYOM2	8	rs147884694	8	2079757	-0.835011	8.98703e-08
ENSG00000037474	NSUN2	5	rs3797179	5	6666922	-0.325835	5.64953e-09
ENSG00000043514	TRIT1	1	rs3131690	1	40358052	-0.171748	9.33757e-06
ENSG00000054793	ATP9A	20	rs6096573	20	50383679	0.261232	2.17361e-06
ENSG00000055483	USP36	17	rs8079047	17	76775673	-0.314456	1.29654e-09
ENSG00000063180	CA11	19	rs58739675	19	49155012	-0.106255	1.72423e-05
ENSG00000065135	GNAI3	1	rs11810577	1	110138109	0.21377	2.73985e-08
ENSG00000065268	WDR18	19	rs2240152	19	992903	0.227879	9.01575e-07
ENSG00000065970	FOXJ2	12	rs4883479	12	8208901	-0.186829	2.3958e-07
ENSG00000067057	PFKP	10	rs9423471	10	3165808	0.270781	1.57255e-05
ENSG00000068097	HEATR6	17	rs7223281	17	58172447	-0.201527	7.36855e-06
ENSG00000071894	CPSF1	8	rs7460425	8	145594354	0.183171	8.36882e-10
ENSG00000079257	LXN	3	rs7612250	3	158331136	-0.112202	3.94034e-07
ENSG00000079277	MKNK1	1	rs1258008	1	47089024	-0.192221	2.88968e-07
ENSG00000085449	WDFY1	2	rs620678	2	224738225	0.236135	1.03022e-06
ENSG00000085871	MGST2	4	rs8192013	4	140588391	-0.192415	1.09194e-06
ENSG00000087253	LPCAT2	16	rs12933746	16	55617202	-0.48418	6.07136e-10
ENSG00000088833	NSFL1C	20	rs9575	20	1426393	0.172744	1.46378e-07
ENSG00000089876	DHX32	10	rs10751535	10	127589202	0.141019	5.54692e-07
ENSG00000093000	NUP50	22	rs6007500	22	45583935	0.305207	2.68963e-10
ENSG00000099974	DDTL	22	rs151273565	22	24280334	-0.112607	7.59273e-07
ENSG00000099977	DDT	22	rs365158	22	24323849	-0.295986	2.5383e-08
ENSG00000100347	SAMM50	22	rs139052	22	44327012	0.12816	7.99238e-06
ENSG00000100376	FAM118A	22	rs2350629	22	45731050	0.381999	1.04321e-09
ENSG00000101307	SIRPB1	20	rs138495919	20	1589353	0.233585	3.91334e-06
ENSG00000103021	CCDC113	16	rs37363	16	58198956	0.108875	7.15286e-06
ENSG00000103121	CMC2	16	rs12928638	16	81049800	-0.206373	1.62667e-08
ENSG00000103160	HSDL1	16	rs3208968	16	84211969	-0.168653	1.26167e-08
ENSG00000103591	AAGAB	15	rs11636197	15	67587368	-0.153848	2.4333e-07
ENSG00000104728	ARHGEF10	8	rs78188929	8	1804621	-0.501885	5.117e-13
ENSG00000105483	CARD8	19	rs7508437	19	48718027	0.237758	3.50242e-08
ENSG00000105499	PLA2G4C	19	rs11564512	19	48610399	-0.292583	6.12418e-07
ENSG00000105726	ATP13A1	19	rs58434384	19	19786099	-0.295941	1.47067e-07
ENSG00000105983	LMBR1	7	rs2969115	7	156732961	0.0913624	1.55132e-05
ENSG00000106733	NMRK1	9	rs6560421	9	77744416	0.209962	9.84605e-08
ENSG00000108064	TFAM	10	rs16912188	10	60148751	0.301767	2.81872e-08
ENSG00000108523	RNF167	17	rs6559	17	4848450	0.228825	3.61703e-09
ENSG00000109775	UFSP2	4	rs4862529	4	186364830	0.166434	7.40695e-07
ENSG00000110628	SLC22A18	11	rs424663	11	2929659	0.477558	1.02368e-08
ENSG00000110852	CLEC2B	12	rs253154	12	10011240	0.417801	2.21288e-12
ENSG00000110871	COQ5	12	rs574858	12	121010696	-0.125616	3.64829e-07
ENSG00000110906	KCTD10	12	rs10850379	12	110002777	-0.210531	1.16177e-06
ENSG00000111224	PARP11	12	rs76960617	12	3994065	-0.144824	1.31341e-05
ENSG00000111266	DUSP16	12	rs3751261	12	12618427	-0.251391	9.00398e-07
ENSG00000111671	SPSB2	12	rs2071073	12	7015707	-0.271446	3.83833e-10
ENSG00000112299	VNN1	6	rs4897612	6	133035325	-0.350293	3.04291e-07
ENSG00000113368	LMNB1	5	rs2973598	5	126162415	0.218617	1.39008e-05
ENSG00000114742	WDR48	3	rs7623343	3	39146792	-0.220542	2.22917e-11
ENSG00000116213	WRAP73	1	rs10752739	1	3572732	-0.131842	1.40581e-05
ENSG00000116688	MFN2	1	rs11577895	1	12056945	0.183228	4.51033e-06
ENSG00000116857	TMEM9	1	rs4915486	1	201110963	-0.166361	4.65316e-06
ENSG00000117139	KDM5B	1	rs78985989	1	202679139	-0.125795	1.26038e-05
ENSG00000118217	ATF6	1	rs76771026	1	161799118	-0.192449	1.74378e-05
ENSG00000119669	IRF2BPL	14	rs12891109	14	77484622	-0.186553	8.51395e-06
ENSG00000119718	EIF2B2	14	rs4903273	14	75441795	0.132753	5.18899e-06
ENSG00000123179	EBPL	13	rs1407636	13	50333882	0.183162	2.74045e-06
ENSG00000123219	CENPK	5	rs37252	5	64922347	0.160108	2.44105e-08
ENSG00000125780	TGM3	20	rs6075802	20	2195235	-0.518091	6.8257e-06
ENSG00000128191	DGCR8	22	rs402350	22	20110925	-0.181708	4.88282e-06
ENSG00000129295	LRRC6	8	rs10283307	8	133737802	0.286615	5.73405e-09
ENSG00000130429	ARPC1B	7	rs10255399	7	98970124	0.161958	8.7189e-06
ENSG00000133393	FOPNL	16	rs11075283	16	15970044	-0.164377	6.97431e-06
ENSG00000133704	IPO8	12	rs10843802	12	30808019	0.300703	2.11305e-16
ENSG00000133731	IMPA1	8	rs3735700	8	82634408	0.240306	4.05858e-06
ENSG00000134758	RNF138	18	rs4239374	18	29702225	0.297275	2.62863e-09
ENSG00000134809	TIMM10	11	rs2729381	11	57309640	-0.267972	1.31652e-05
ENSG00000134815	DHX34	19	rs2463086	19	47897332	0.251979	2.77666e-06
ENSG00000134864	GGACT	13	rs3825501	13	101240865	-0.206967	4.44522e-06
ENSG00000134996	OSTF1	9	rs773009	9	77795505	0.17179	2.71263e-06
ENSG00000138031	ADCY3	2	rs7576172	2	25129787	-0.507824	6.62061e-07
ENSG00000138381	ASNSD1	2	rs6756913	2	190505766	-0.241442	3.0297e-07
ENSG00000138867	GUCD1	22	rs2012772	22	24940242	0.138147	1.76065e-05
ENSG00000139899	CBLN3	14	rs1956905	14	24900209	-0.216777	1.16491e-07
ENSG00000140386	SCAPER	15	rs12913810	15	77166675	0.125194	1.28164e-05
ENSG00000140400	MAN2C1	15	rs7497596	15	75598235	0.171847	7.95903e-06
ENSG00000141179	PCTP	17	rs9911384	17	53867119	0.343669	2.74415e-08
ENSG00000141560	FN3KRP	17	rs2246577	17	80680394	-0.170461	9.1334e-07
ENSG00000141698	NT5C3B	17	rs145930835	17	40046691	-0.320958	6.85997e-09
ENSG00000142102	ATHL1	11	rs11246057	11	295808	-0.326122	5.19711e-07
ENSG00000144115	THNSL2	2	rs34029976	2	88537797	-0.257273	1.44871e-06
ENSG00000144597	EAF1	3	rs13081119	3	15451021	0.239865	1.15507e-08
ENSG00000145214	DGKQ	4	rs4690220	4	980464	-0.22237	1.62281e-07
ENSG00000145495	MARCH6	5	rs11748200	5	10318542	-0.251719	4.21119e-08
ENSG00000147813	NAPRT	8	rs1809148	8	144663075	0.269784	8.09412e-07
ENSG00000147852	VLDLR	9	rs62535727	9	2610881	-0.134036	1.14337e-05
ENSG00000148384	INPP5E	9	rs3812565	9	139272502	0.150021	1.1126e-05
ENSG00000148572	NRBF2	10	rs10822143	10	64887856	0.222076	1.30346e-07
ENSG00000149577	SIDT2	11	rs7931335	11	117036805	-0.148958	5.94662e-07
ENSG00000153029	MR1	1	rs10797666	1	181018799	0.160268	1.0497e-05
ENSG00000154099	DNAAF1	16	rs3208968	16	84211969	-1.47846	1.20686e-12
ENSG00000154781	CCDC174	3	rs3846122	3	14680270	-0.145561	1.2892e-06
ENSG00000155158	TTC39B	9	rs10121558	9	15296674	0.158651	5.77122e-06
ENSG00000156261	CCT8	21	rs7281679	21	30369240	-0.129	1.68905e-05
ENSG00000158604	TMED4	7	rs1812036	7	44667436	0.145931	6.6254e-06
ENSG00000158825	CDA	1	rs526987	1	20932674	0.290272	1.61629e-06
ENSG00000158869	FCER1G	1	rs10908826	1	161172525	0.201258	3.14633e-06
ENSG00000159496	RGL4	22	rs7290711	22	24004914	0.473781	2.86435e-08
ENSG00000159579	RSPRY1	16	rs2305694	16	57168651	0.32341	1.32326e-06
ENSG00000160226	C21orf2	21	rs35274657	21	45767381	-0.230748	2.74485e-06
ENSG00000160294	MCM3AP	21	rs9984805	21	47607057	0.142906	2.28951e-06
ENSG00000160408	ST6GALNAC6	9	rs10819317	9	130668957	0.156971	3.40535e-07
ENSG00000161920	MED11	17	rs8077091	17	4659295	-0.0947189	9.98112e-06
ENSG00000162994	CLHC1	2	rs7568777	2	55383427	-0.176791	6.82377e-08
ENSG00000163568	AIM2	1	rs76706394	1	159068032	0.16606	3.8743e-07
ENSG00000163993	S100P	4	rs73211736	4	6694985	-0.837043	1.26212e-06
ENSG00000165983	PTER	10	rs112681498	10	16555862	-0.12882	1.44505e-10
ENSG00000166086	JAM3	11	rs658830	11	134035927	-0.243109	3.92978e-07
ENSG00000166825	ANPEP	15	rs12442778	15	90360038	0.284325	1.0388e-06
ENSG00000166831	RBPMS2	15	rs76542511	15	65095306	0.28113	1.17462e-06
ENSG00000166847	DCTN5	16	rs26760	16	23680286	-0.164649	4.18436e-08
ENSG00000166888	STAT6	12	rs324010	12	57482252	0.19429	7.20755e-07
ENSG00000166896	XRCC6BP1	12	rs11172388	12	58337132	0.229328	1.20021e-10
ENSG00000167065	DUSP18	22	rs5749131	22	31001822	-0.136115	1.03459e-05
ENSG00000167261	DPEP2	16	rs9889207	16	68069612	-0.227842	1.74234e-05
ENSG00000167528	ZNF641	12	rs11168536	12	48745051	-0.126047	1.25349e-05
ENSG00000167703	SLC43A2	17	rs17626180	17	1508522	-0.281433	9.3907e-06
ENSG00000167766	ZNF83	19	rs2100867	19	53127011	-0.257951	9.55544e-08
ENSG00000167850	CD300C	17	rs1627936	17	72548352	0.245545	3.93847e-07
ENSG00000168275	COA6	1	rs4300255	1	234510262	-0.183994	5.83557e-07
ENSG00000168672	FAM84B	8	rs142901918	8	127508616	-0.290086	1.54524e-05
ENSG00000168827	GFM1	3	rs56167308	3	158367837	-0.188048	1.83017e-08
ENSG00000168903	BTNL3	5	rs72494581	5	180430797	-0.356967	2.52383e-06
ENSG00000169826	CSGALNACT2	10	rs2565201	10	43618484	0.250999	1.12893e-08
ENSG00000170430	MGMT	10	rs61862579	10	131314289	-0.167189	4.29801e-06
ENSG00000170448	NFXL1	4	rs10938499	4	47848377	-0.424215	1.56826e-05
ENSG00000170486	KRT72	12	rs3914907	12	53024531	-0.533288	1.77957e-07
ENSG00000171763	SPATA5L1	15	rs68087211	15	45642587	-0.129	2.36613e-06
ENSG00000171860	C3AR1	12	rs11057065	12	8208244	-0.752145	1.94412e-11
ENSG00000172543	CTSW	11	rs656980	11	65656282	0.261078	2.34795e-06
ENSG00000172548	NIPAL4	5	rs58995342	5	156828340	0.222337	1.11701e-05
ENSG00000172765	TMCC1	3	rs62265608	3	129639823	-0.13598	3.59633e-06
ENSG00000173209	AHSA2	2	rs1729658	2	61373520	0.210523	3.8786e-08
ENSG00000173230	GOLGB1	3	rs9841861	3	121453361	0.402983	4.10962e-07
ENSG00000173915	USMG5	10	rs61869825	10	105073070	-0.513379	8.61709e-10
ENSG00000174227	PIGG	4	rs12512697	4	552649	-0.158015	2.48648e-06
ENSG00000175348	TMEM9B	11	rs4370967	11	9015402	0.173699	5.11264e-07
ENSG00000176148	TCP11L1	11	rs7124502	11	33063302	0.0905294	3.03752e-06
ENSG00000176393	RNPEP	1	rs4950752	1	201956427	-0.177632	7.48563e-07
ENSG00000176715	ACSF3	16	rs78402757	16	89236913	-0.339754	4.02886e-10
ENSG00000177370	TIMM22	17	rs2586304	17	910636	0.225978	2.48123e-08
ENSG00000177606	JUN	1	rs4647001	1	59250418	-0.290834	1.75998e-06
ENSG00000177697	CD151	11	rs35702851	11	841284	0.364905	3.4847e-08
ENSG00000178381	ZFAND2A	7	rs4311583	7	1199224	0.226463	6.28738e-06
ENSG00000178952	TUFM	16	rs7500654	16	28825405	-0.20262	1.73003e-06
ENSG00000179029	TMEM107	17	rs9901637	17	8076802	0.208632	2.49963e-07
ENSG00000179344	HLA-DQB1	6	rs9273501	6	32628361	-0.534033	3.04914e-09
ENSG00000179862	CITED4	1	rs10081968	1	41355777	-0.278391	8.93609e-07
ENSG00000182179	UBA7	3	rs2280405	3	49895052	-0.197951	1.20867e-06
ENSG00000182871	COL18A1	21	rs9982572	21	46906448	0.218442	2.46987e-06
ENSG00000183833	MAATS1	3	rs7617287	3	119418531	-0.210552	3.32892e-07
ENSG00000184029	DSCR4	21	rs2256062	21	39448635	-0.131553	1.76005e-05
ENSG00000184056	VPS33B	15	rs4932382	15	91567985	-0.119169	1.70522e-05
ENSG00000184752	NDUFA12	12	rs7965015	12	95396238	-0.275219	5.92054e-07
ENSG00000184939	ZFP90	16	rs1645923	16	68581051	-0.201428	6.10665e-07
ENSG00000185811	IKZF1	7	rs10265042	7	50441252	-0.623298	2.33779e-06
ENSG00000185838	GNB1L	22	rs74953564	22	19793884	-0.170148	7.31593e-08
ENSG00000187624	C17orf97	17	rs7502594	17	260182	-0.393259	1.52626e-09
ENSG00000188056	TREML4	6	rs4588687	6	41186104	0.524497	2.58093e-07
ENSG00000189077	TMEM120A	7	rs78938157	7	75703254	-0.378233	4.24424e-07
ENSG00000196126	HLA-DRB1	6	rs9271171	6	32577907	2.18132	2.6481e-15
ENSG00000196329	GIMAP5	7	rs2286898	7	150440976	-0.256906	1.55146e-07
ENSG00000197728	RPS26	12	rs10876864	12	56401085	1.05107	4.90652e-10
ENSG00000197860	SGTB	5	rs152068	5	64934391	0.346044	1.46221e-09
ENSG00000198502	HLA-DRB5	6	rs73726853	6	32538319	1.82829	1.58789e-12
ENSG00000198818	SFT2D1	6	rs6901896	6	166672560	-0.133313	7.97062e-07
ENSG00000198843	SELT	3	rs9818568	3	150300051	0.1771	1.59288e-07
ENSG00000204516	MICB	6	rs147420351	6	31484892	-0.257949	3.88717e-06
ENSG00000204525	HLA-C	6	rs9264904	6	31272553	0.722346	2.90146e-08
ENSG00000205057	CLLU1OS	12	rs73222044	12	92826490	-0.3683	2.74591e-07
ENSG00000206562	METTL6	3	rs73144120	3	15477140	0.152386	7.94354e-06
ENSG00000212283	SNORD89	2	rs1550527	2	101844015	-0.164425	1.31687e-05
ENSG00000213221	DNLZ	9	rs28556700	9	139245525	-0.462607	1.10145e-07
ENSG00000213462	ERV3-1	7	rs111945345	7	64428658	-0.149263	4.03769e-07
ENSG00000214530	STARD10	11	rs10751215	11	72526087	0.164879	6.69549e-07
ENSG00000214753	HNRNPUL2	11	rs145952385	11	62470893	0.357439	1.71847e-08
ENSG00000214941	ZSWIM7	17	rs11078320	17	15898688	-0.309415	4.75095e-08
ENSG00000215440	NPEPL1	20	rs73618613	20	57276433	-0.258897	1.57475e-09
ENSG00000231389	HLA-DPA1	6	rs151312481	6	32980222	-0.245287	8.4931e-06
ENSG00000239282	GATSL3	22	rs2240422	22	30700924	0.138755	5.60701e-06
ENSG00000239998	LILRA2	19	rs4806781	19	55069620	0.280167	7.26203e-07
ENSG00000241878	PISD	22	rs8461	22	32015162	-0.181651	1.56495e-05
ENSG00000254415	SIGLEC14	19	rs10413597	19	52155141	1.72613	1.82753e-06
ENSG00000257093	KIAA1147	7	rs147301602	7	141473221	0.222658	1.2432e-05
