# Supplementary material for: Deciphering the genetic control of gene expression following Mycobacterium leprae antigen stimulation
Source: PLoS Genet. 2017 Aug 9;13(8):e1006952. doi: 10.1371/journal.pgen.1006952 (PMC5565194; doi:10.1371/journal.pgen.1006952)
Supplement: S6 Table — (XLSX) [file pgen.1006952.s012.xlsx]

## Sheet: Caption
S6 Table. Enrichment analysis of reQTL disrupting transcription factor binding sites.
MATCH: the number of TFBS affected by the SNP; TF: the names of the affected transcription factors; ScoreDiff: the absolute score difference between the alternative and the reference alleles.
The enrichment is the number of TF-SNP hits (from query) divided by the probability p (p = TF-SNP matches (genome-wide) / total number of SNPs matching a TFBS)
Enrichment P values are calculated using a binomial distribution of size n=256 (256 SNPs which matched with at least one TFBS), and probability p.
The total number of SNPs matching a TFBS according to the SNP2TFBS tool is 3,432,802.

## Sheet: Enrichment analysis
TF Name	TF-SNP matches (genome-wide)	TF-SNP hits (from query)	Fraction of TF-SNP hits	Enrichment	P value		p	enrich	pvals
Mafb	6619	4	0.000604321	8.10357	0.00164268		0.00192816	8.10357	pbinom(TF-SNP hits (from query)-1, 256 (#of tested SNPs), p, lower.tail=F)
E2F4	14380	5	0.000347705	4.66251	0.00477942
Zfx	84770	14	0.000165153	2.2146	0.00504539
E2F1	16499	5	0.000303049	4.0637	0.00838015
PPARG_RXRA	21593	5	0.000231557	3.10503	0.0238328
ELK1	4312	2	0.000463822	6.21957	0.0417482
NR3C1	10696	3	0.000280479	3.76105	0.0468163
CEBPA	4936	2	0.000405186	5.4333	0.0530933
HNF4A	11861	3	0.00025293	3.39163	0.0600216
Arnt_Ahr	75959	10	0.00013165	1.76534	0.0606313
CEBPB	12839	3	0.000233663	3.13328	0.0723019
E2F3	39019	6	0.000153771	2.06198	0.0739689
Ets1	22116	4	0.000180865	2.42528	0.0851245
Arnt	50634	7	0.000138247	1.85381	0.0871376
KLF5	61743	8	0.000129569	1.73744	0.0935424
Erg	14483	3	0.000207139	2.77761	0.0952161
E2F6	33466	5	0.000149405	2.00343	0.107266
ESR1	24743	4	0.000161662	2.16779	0.115386
USF1	7807	2	0.00025618	3.43522	0.115922
ZEB1	26974	4	0.000148291	1.98849	0.144262
NFYB	9103	2	0.000219708	2.94615	0.148341
Nfe2l2	9442	2	0.00021182	2.84037	0.157101
EGR1	70916	8	0.00011281	1.51271	0.16311
NR2C2	19125	3	0.000156863	2.10343	0.172486
REST	19562	3	0.000153359	2.05644	0.180508
CTCF	19639	3	0.000152757	2.04838	0.181932
Bhlhe40	10582	2	0.000189	2.53438	0.187196
Bach1_Mafk	11016	2	0.000181554	2.43453	0.198857
Lhx3	11508	2	0.000173792	2.33045	0.212178
Stat6	12009	2	0.000166542	2.23322	0.225829
NHLH1	12332	2	0.00016218	2.17473	0.234663
MZF1_1-4	126853	12	9.45977e-05	1.2685	0.240649
GABPA	3926	1	0.000254712	3.41553	0.253939
PLAG1	34341	4	0.000116479	1.56191	0.255052
FLI1	13204	2	0.000151469	2.03111	0.258595
FEV	13350	2	0.000149813	2.0089	0.262608
RORA_1	4503	1	0.000222074	2.97788	0.285398
Nkx3-2	4504	1	0.000222025	2.97722	0.285452
RFX5	14634	2	0.000136668	1.83263	0.297864
Pax4	61499	6	9.75626e-05	1.30825	0.31122
BATF_JUN	5193	1	0.000192567	2.5822	0.321289
SP2	111891	10	8.93727e-05	1.19843	0.325479
Klf4	50628	5	9.87596e-05	1.32431	0.327082
ELK4	5406	1	0.00018498	2.48046	0.332001
NFATC2	63108	6	9.50751e-05	1.2749	0.332168
TP63	27292	3	0.000109922	1.47399	0.332912
HNF1A	5523	1	0.000181061	2.42792	0.337813
Nr2e3	16683	2	0.000119883	1.60755	0.353473
Pdx1	102271	9	8.80015e-05	1.18005	0.354719
Klf1	40693	4	9.8297e-05	1.3181	0.360578
Pax2	6140	1	0.000162866	2.18394	0.367641
Nr1h3_Rxra	17483	2	0.000114397	1.53399	0.374793
NFE2L1_MafG	79118	7	8.84754e-05	1.1864	0.377476
Foxo1	7162	1	0.000139626	1.8723	0.414132
JUN	7179	1	0.000139295	1.86786	0.414876
ZNF354C	82971	7	8.43668e-05	1.13131	0.424152
Rfx1	7546	1	0.000132521	1.77702	0.430707
USF2	7723	1	0.000129483	1.73629	0.438188
TAL1_GATA1	7799	1	0.000128222	1.71937	0.441371
Gata1	7921	1	0.000126247	1.69289	0.446442
GATA2	7926	1	0.000126167	1.69182	0.446649
Spi1	33164	3	9.04595e-05	1.21301	0.449884
SMAD2_SMAD3_SMAD4	33420	3	8.97666e-05	1.20371	0.454825
Foxq1	8293	1	0.000120584	1.61695	0.461623
NFE2_MAF	8296	1	0.00012054	1.61637	0.461743
TEAD1	8310	1	0.000120337	1.61364	0.462307
Nkx2-5	8744	1	0.000114364	1.53355	0.479473
SREBF2	21666	2	9.23105e-05	1.23783	0.480763
Esrrb	9067	1	0.00011029	1.47892	0.491893
TCF7L2	9221	1	0.000108448	1.45422	0.49771
ESRRA	9404	1	0.000106338	1.42592	0.504537
Rxra	9788	1	0.000102166	1.36998	0.518563
TFAP2A	23552	2	8.49185e-05	1.1387	0.524849
STAT2_STAT1	23666	2	8.45094e-05	1.13322	0.527433
SPIB	51243	4	7.80594e-05	1.04673	0.532148
MZF1_5-13	23898	2	8.3689e-05	1.12222	0.532661
PAX5	51568	4	7.75675e-05	1.04013	0.53711
RUNX2	24218	2	8.25832e-05	1.10739	0.539807
MAFF	10436	1	9.58222e-05	1.28492	0.54134
PPARG	10468	1	9.55292e-05	1.28099	0.542437
TP53	10743	1	9.30839e-05	1.2482	0.551753
Tcf12	11250	1	8.88889e-05	1.19195	0.568437
FOXA1	11343	1	8.81601e-05	1.18217	0.57143
Myc	11374	1	8.79198e-05	1.17895	0.572423
HNF4G	11382	1	8.7858e-05	1.17812	0.572679
FOXD1	11418	1	8.7581e-05	1.17441	0.573828
Pou5f1_Sox2	11420	1	8.75657e-05	1.1742	0.573892
Sox6	11563	1	8.64827e-05	1.15968	0.578427
THAP1	11687	1	8.55652e-05	1.14738	0.582321
Sox2	11924	1	8.38645e-05	1.12457	0.589663
SOX10	139269	10	7.18035e-05	0.96284	0.592777
SP1	98565	7	7.10191e-05	0.952323	0.603872
ESR2	12522	1	7.98594e-05	1.07087	0.607623
Mycn	12554	1	7.96559e-05	1.06814	0.608561
MAX	12570	1	7.95545e-05	1.06678	0.60903
FOXO3	12851	1	7.7815e-05	1.04345	0.617167
Myog	13245	1	7.55002e-05	1.01241	0.628294
RUNX1	13397	1	7.46436e-05	1.00092	0.6325
BRCA1	29963	2	6.6749e-05	0.895063	0.65505
POU2F2	15079	1	6.63174e-05	0.889275	0.675992
FOXP1	77387	5	6.46103e-05	0.866385	0.686049
Sox3	15577	1	6.41972e-05	0.860845	0.687857
ELF1	15680	1	6.37755e-05	0.85519	0.690256
Gfi1b	16668	1	5.99952e-05	0.804499	0.712358
INSM1	17275	1	5.78871e-05	0.776231	0.72515
SREBF1	17427	1	5.73822e-05	0.76946	0.728263
Nr5a2	17888	1	5.59034e-05	0.74963	0.737493
NFIC	82989	5	6.02489e-05	0.807901	0.742788
Tcf3	23038	1	4.34065e-05	0.582055	0.82162
PRDM1	26096	1	3.832e-05	0.513848	0.858228
TFAP2C	28651	1	3.49028e-05	0.468025	0.883003
EHF	32196	1	3.10598e-05	0.416492	0.910394
NKX3-1	32759	1	3.0526e-05	0.409334	0.914113
Sox5	97886	4	4.08639e-05	0.547959	0.935275
ARID3A	187194	9	4.80785e-05	0.644703	0.941761
ZNF263	264957	13	4.90646e-05	0.657926	0.962305
Prrx2	381402	20	5.24381e-05	0.703163	0.967533
IRF1	165111	6	3.63392e-05	0.487286	0.98513
EGR2	154911	2	1.29106e-05	0.173124	0.999904
Atoh1	16034	0	0	0	1
Bcl6	10619	0	0	0	1
CDX2	12537	0	0	0	1
CREB1	2289	0	0	0	1
Crx	4969	0	0	0	1
DUX4	5218	0	0	0	1
Ddit3_Cebpa	5085	0	0	0	1
EBF1	17744	0	0	0	1
ELF5	12009	0	0	0	1
En1	6916	0	0	0	1
FOS	7086	0	0	0	1
FOSL1	8550	0	0	0	1
FOSL2	7698	0	0	0	1
FOXC1	4843	0	0	0	1
FOXF2	6917	0	0	0	1
FOXH1	5261	0	0	0	1
FOXI1	36768	0	0	0	1
FOXL1	45919	0	0	0	1
FOXP2	8105	0	0	0	1
Foxa2	8196	0	0	0	1
Foxd3	47081	0	0	0	1
GATA3	10846	0	0	0	1
Gata4	6958	0	0	0	1
Gfi1	7942	0	0	0	1
HIF1A_ARNT	5538	0	0	0	1
HINFP	819	0	0	0	1
HLF	3069	0	0	0	1
HNF1B	4052	0	0	0	1
HOXA5	6717	0	0	0	1
HSF1	10410	0	0	0	1
Hand1_Tcfe2a	6794	0	0	0	1
Hltf	4415	0	0	0	1
Hoxa9	4426	0	0	0	1
Hoxc9	5161	0	0	0	1
JUNB	6262	0	0	0	1
JUND	7635	0	0	0	1
JUN_FOS	26839	0	0	0	1
MAFK	9281	0	0	0	1
MEF2A	15162	0	0	0	1
MEF2C	20936	0	0	0	1
MYC_MAX	8238	0	0	0	1
Mecom	7156	0	0	0	1
Meis1	13726	0	0	0	1
Myb	5513	0	0	0	1
Myod1	16791	0	0	0	1
NFIL3	6557	0	0	0	1
NFKB1	9607	0	0	0	1
NFYA	11787	0	0	0	1
NR2F1	8932	0	0	0	1
NR4A2	7321	0	0	0	1
NRF1	10231	0	0	0	1
Nobox	6136	0	0	0	1
PBX1	6416	0	0	0	1
Pax6	4619	0	0	0	1
REL	6202	0	0	0	1
RELA	5911	0	0	0	1
RFX2	10005	0	0	0	1
RORA_2	5161	0	0	0	1
RXR_RAR_DR5	10022	0	0	0	1
SOX9	7886	0	0	0	1
SRF	10323	0	0	0	1
SRY	7466	0	0	0	1
STAT1	8010	0	0	0	1
STAT3	10149	0	0	0	1
Sox17	7520	0	0	0	1
Spz1	7946	0	0	0	1
Stat4	11441	0	0	0	1
Stat5a_Stat5b	9008	0	0	0	1
T	4282	0	0	0	1
TAL1_TCF3	6454	0	0	0	1
TBP	4491	0	0	0	1
Tcfcp2l1	10304	0	0	0	1
YY1	11455	0	0	0	1
ZBTB33	2855	0	0	0	1
znf143	27486	0	0	0	1

## Sheet: SNP Effect on TFBS
Chromosome	Start_Position (hg19)	End_Position (hg19)	Reference Allele	Alternative Allele	Effect	rs_ID
chr1	40556941	40556942	A	T	MATCH=1;TF=ARID3A;ScoreDiff=0	rs56654546
chr1	41356627	41356628	A	G	MATCH=1;TF=Spi1;ScoreDiff=272	rs35873233
chr1	41358653	41358654	G	A	MATCH=1;TF=PAX5;ScoreDiff=76	rs4660482
chr1	54669983	54669984	A	G	MATCH=1;TF=SP1;ScoreDiff=9	rs6693202
chr1	54683924	54683925	G	A	MATCH=1;TF=EGR1;ScoreDiff=-66	rs6621
chr1	54685194	54685195	T	A	MATCH=2;TF=Klf4,KLF5;ScoreDiff=-26,7	rs2026045
chr1	86081452	86081453	T	C	MATCH=1;TF=SOX10;ScoreDiff=0	rs12061951
chr1	86098195	86098196	T	G	MATCH=1;TF=MZF1_1-4;ScoreDiff=0	rs7520491
chr1	86171071	86171072	A	G	MATCH=2;TF=BRCA1,Sox5;ScoreDiff=0,0	rs6667672
chr1	86197921	86197922	T	C	MATCH=1;TF=IRF1;ScoreDiff=22	rs12067749
chr1	109709884	109709885	A	C	MATCH=1;TF=Ets1;ScoreDiff=0	rs11102948
chr1	109711623	109711624	T	C	MATCH=1;TF=ARID3A;ScoreDiff=0	rs12727352
chr1	109714016	109714017	T	C	MATCH=1;TF=FOXP1;ScoreDiff=0	rs12082197
chr1	109716796	109716797	G	A	MATCH=1;TF=Pdx1;ScoreDiff=0	rs1556767
chr1	109716989	109716990	A	G	MATCH=1;TF=SREBF2;ScoreDiff=0	rs1556766
chr1	109717941	109717942	G	A	MATCH=1;TF=Zfx;ScoreDiff=-169	rs12072970
chr1	109718618	109718619	G	T	MATCH=1;TF=Prrx2;ScoreDiff=0	rs7519630
chr1	109722151	109722152	C	G	MATCH=3;TF=E2F6,E2F4,E2F1;ScoreDiff=162,66,24	rs17033888
chr1	109722589	109722590	C	T	MATCH=1;TF=NFE2L1_MafG;ScoreDiff=0	rs11102950
chr1	109723639	109723640	C	T	MATCH=2;TF=Arnt,NFE2L1_MafG;ScoreDiff=0,0	rs682288
chr1	234507976	234507977	C	T	MATCH=1;TF=Prrx2;ScoreDiff=0	rs6586384
chr1	234509258	234509259	G	C	MATCH=1;TF=Pax2;ScoreDiff=0	rs10910420
chr1	234511502	234511503	A	G	MATCH=1;TF=TFAP2A;ScoreDiff=-64	rs7523348
chr1	234527574	234527575	C	T	MATCH=1;TF=FOXP1;ScoreDiff=131	rs3862040
chr1	234528005	234528006	A	G	MATCH=1;TF=NFYB;ScoreDiff=-164	rs3754317
chr2	25113988	25113989	T	C	MATCH=1;TF=Zfx;ScoreDiff=169	rs10179794
chr2	25114068	25114069	T	C	MATCH=1;TF=Gata1;ScoreDiff=0	rs10164466
chr2	25116455	25116456	C	T	MATCH=3;TF=CEBPA,CEBPB,ZNF354C;ScoreDiff=217,29,0	rs6736711
chr2	25116965	25116966	T	C	MATCH=2;TF=BATF_JUN,JUN;ScoreDiff=-72,-34	rs7603153
chr2	25118019	25118020	T	C	MATCH=1;TF=CEBPB;ScoreDiff=-65	rs35033157
chr2	25118607	25118608	T	C	MATCH=4;TF=E2F6,E2F3,E2F1,E2F4;ScoreDiff=130,99,85,3	rs6705446
chr2	25118884	25118885	C	T	MATCH=1;TF=IRF1;ScoreDiff=0	rs6545800
chr2	25120085	25120086	C	T	MATCH=5;TF=Klf1,Klf4,EGR1,KLF5,ZNF263;ScoreDiff=-348,-295,-128,-58,24	rs6752483
chr2	25121852	25121853	G	A	MATCH=1;TF=Arnt_Ahr;ScoreDiff=0	rs12713419
chr2	25124387	25124388	C	A	MATCH=1;TF=Sox5;ScoreDiff=0	rs6545808
chr2	25125584	25125585	C	T	MATCH=1;TF=Nkx3-2;ScoreDiff=0	rs876186
chr2	25126229	25126230	A	G	MATCH=1;TF=NFE2L1_MafG;ScoreDiff=0	rs6712981
chr2	25127393	25127394	A	G	MATCH=1;TF=IRF1;ScoreDiff=-74	rs34697209
chr2	25130450	25130451	A	G	MATCH=1;TF=SPIB;ScoreDiff=0	rs11689546
chr2	25130541	25130542	A	C	MATCH=2;TF=Bhlhe40,Arnt;ScoreDiff=173,0	rs10198275
chr2	25132191	25132192	C	A	MATCH=1;TF=POU2F2;ScoreDiff=3	rs6722587
chr2	25135253	25135254	G	A	MATCH=2;TF=NR2C2,ZNF263;ScoreDiff=-14,-8	rs10207642
chr2	25136915	25136916	T	C	MATCH=2;TF=ZNF263,EGR1;ScoreDiff=-133,119	rs10203482
chr3	119421553	119421554	G	C	MATCH=3;TF=SP2,SP1,KLF5;ScoreDiff=-542,-255,-98	rs35864899
chr3	119424821	119424822	C	A	MATCH=1;TF=Sox5;ScoreDiff=0	rs4688028
chr3	119426054	119426055	C	G	MATCH=3;TF=EGR1,PLAG1,ZNF263;ScoreDiff=-180,-174,-49	rs4234664
chr3	119428528	119428529	C	A	MATCH=2;TF=KLF5,Gfi1b;ScoreDiff=-49,0	rs6786722
chr3	119437115	119437116	A	G	MATCH=1;TF=NFE2L1_MafG;ScoreDiff=0	rs4688029
chr3	158271854	158271855	A	C	MATCH=1;TF=ARID3A;ScoreDiff=0	rs73877220
chr3	158274353	158274354	T	C	MATCH=1;TF=NFATC2;ScoreDiff=0	rs9820727
chr3	158287183	158287184	A	G	MATCH=1;TF=NFIC;ScoreDiff=0	rs73154344
chr3	158289869	158289870	G	A	MATCH=2;TF=PLAG1,ZNF263;ScoreDiff=200,160	rs115483681
chr3	158299554	158299555	T	A	MATCH=1;TF=FEV;ScoreDiff=0	rs6441208
chr3	158313002	158313003	C	T	MATCH=1;TF=Nr1h3_Rxra;ScoreDiff=23	rs1435643
chr3	158314187	158314188	T	C	MATCH=1;TF=Mafb;ScoreDiff=0	rs6804230
chr3	158322484	158322485	G	A	MATCH=1;TF=RFX5;ScoreDiff=-65	rs7647356
chr3	158329240	158329241	G	A	MATCH=1;TF=Prrx2;ScoreDiff=0	rs6776225
chr3	158331066	158331067	T	C	MATCH=1;TF=Prrx2;ScoreDiff=0	rs62289788
chr3	158332222	158332223	C	T	MATCH=1;TF=Zfx;ScoreDiff=-29	rs62289789
chr3	158334420	158334421	A	G	MATCH=1;TF=Pou5f1_Sox2;ScoreDiff=180	rs62289791
chr3	158339608	158339609	G	T	MATCH=1;TF=Prrx2;ScoreDiff=0	rs62286610
chr3	158339722	158339723	T	A	MATCH=1;TF=NFE2L1_MafG;ScoreDiff=0	rs56089505
chr3	158341215	158341216	G	A	MATCH=1;TF=SOX10;ScoreDiff=0	rs56410505
chr3	158341634	158341635	G	A	MATCH=2;TF=SOX10,Sox2;ScoreDiff=0,0	rs6784019
chr3	158342348	158342349	A	G	MATCH=1;TF=NFIC;ScoreDiff=0	rs6808527
chr3	158343066	158343067	G	A	MATCH=2;TF=TP53,TP63;ScoreDiff=-224,-156	rs62286615
chr3	158343068	158343069	A	C	MATCH=1;TF=TP63;ScoreDiff=-156	rs62286616
chr3	158344429	158344430	G	A	MATCH=2;TF=HNF4G,HNF4A;ScoreDiff=-182,-27	rs62286618
chr3	158345911	158345912	C	G	MATCH=2;TF=TFAP2A,TFAP2C;ScoreDiff=-77,36	rs55875763
chr3	158352505	158352506	T	C	MATCH=1;TF=INSM1;ScoreDiff=-212	rs62286647
chr3	158360352	158360353	C	T	MATCH=1;TF=NFE2L1_MafG;ScoreDiff=0	rs62286650
chr3	158364332	158364333	G	A	MATCH=1;TF=PPARG;ScoreDiff=-59	rs56075263
chr3	158376353	158376354	C	G	MATCH=1;TF=NFATC2;ScoreDiff=0	rs17697458
chr3	158378283	158378284	G	A	MATCH=1;TF=Zfx;ScoreDiff=-254	rs62288301
chr3	158402014	158402015	A	G	MATCH=1;TF=ZNF263;ScoreDiff=128	rs62288305
chr3	158405872	158405873	G	A	MATCH=2;TF=Pdx1,Prrx2;ScoreDiff=0,0	rs17698494
chr3	158436012	158436013	C	T	MATCH=1;TF=Zfx;ScoreDiff=-203	rs56152025
chr3	158442327	158442328	G	A	MATCH=4;TF=ELK4,ELF1,ELK1,GABPA;ScoreDiff=-152,-32,-15,-4	rs6783610
chr3	158452881	158452882	A	G	MATCH=1;TF=NFATC2;ScoreDiff=0	rs56235582
chr3	158457059	158457060	A	G	MATCH=3;TF=Spi1,Ets1,SPIB;ScoreDiff=-51,-6,0	rs55717824
chr4	1197551	1197552	G	A	MATCH=1;TF=Pax4;ScoreDiff=-61	rs1250103
chr4	1234027	1234028	C	G	MATCH=1;TF=REST;ScoreDiff=-117	rs3894353
chr4	108609142	108609143	A	C	MATCH=1;TF=FOXP1;ScoreDiff=142	rs4956125
chr4	108614391	108614392	G	A	MATCH=4;TF=ZNF263,Erg,Ets1,EHF;ScoreDiff=-46,33,33,0	rs62313396
chr4	108623627	108623628	T	C	MATCH=1;TF=PPARG_RXRA;ScoreDiff=-95	rs2522427
chr4	108634714	108634715	A	G	MATCH=1;TF=ESR1;ScoreDiff=147	rs62313401
chr4	186102638	186102639	A	C	MATCH=1;TF=Arnt_Ahr;ScoreDiff=0	rs13123306
chr5	7901905	7901906	G	A	MATCH=1;TF=Pax4;ScoreDiff=-52	rs2077744
chr5	7926943	7926944	A	G	MATCH=1;TF=ZEB1;ScoreDiff=81	rs2624237
chr6	31510104	31510105	A	G	MATCH=1;TF=ZNF354C;ScoreDiff=0	rs2239528
chr7	75623739	75623740	C	T	MATCH=1;TF=ESR1;ScoreDiff=-161	rs75685429
chr7	75632100	75632101	A	G	MATCH=2;TF=Klf4,Klf1;ScoreDiff=144,0	rs3779423
chr7	75638354	75638355	C	T	MATCH=1;TF=Pax4;ScoreDiff=-69	rs76705435
chr7	75639696	75639697	C	T	MATCH=1;TF=Rxra;ScoreDiff=-2	rs75910358
chr7	75659147	75659148	T	C	MATCH=1;TF=CTCF;ScoreDiff=-36	rs57340978
chr7	75659651	75659652	C	G	MATCH=1;TF=KLF5;ScoreDiff=-59	rs76303680
chr7	75673972	75673973	C	T	MATCH=2;TF=PPARG_RXRA,NR2C2;ScoreDiff=193,107	rs76084321
chr7	96747483	96747484	C	G	MATCH=1;TF=Spi1;ScoreDiff=397	rs6973504
chr7	96764890	96764891	A	G	MATCH=1;TF=MZF1_1-4;ScoreDiff=0	rs78913221
chr7	96769409	96769410	A	G	MATCH=1;TF=NFE2L1_MafG;ScoreDiff=0	rs75445567
chr7	96771532	96771533	T	C	MATCH=2;TF=Pdx1,Prrx2;ScoreDiff=0,0	rs78111355
chr7	96775100	96775101	A	G	MATCH=2;TF=FOXD1,Foxq1;ScoreDiff=0,0	rs4727355
chr7	96801000	96801001	G	T	MATCH=1;TF=Zfx;ScoreDiff=-214	rs10499936
chr8	11359556	11359557	T	C	MATCH=1;TF=NFIC;ScoreDiff=0	rs2409781
chr8	82573579	82573580	C	T	MATCH=1;TF=NKX3-1;ScoreDiff=0	rs2162546
chr8	82587367	82587368	C	T	MATCH=3;TF=PPARG_RXRA,Sox3,Sox6;ScoreDiff=-233,46,0	rs2268431
chr8	82595444	82595445	G	A	MATCH=1;TF=MZF1_1-4;ScoreDiff=0	rs2912803
chr8	82600150	82600151	G	A	MATCH=2;TF=RUNX2,SOX10;ScoreDiff=42,0	rs2955009
chr8	96194736	96194737	T	G	MATCH=1;TF=ELK1;ScoreDiff=11	rs10956941
chr8	144682310	144682311	G	C	MATCH=1;TF=Zfx;ScoreDiff=-40	rs3210186
chr9	77705569	77705570	T	C	MATCH=2;TF=Arnt_Ahr,SOX10;ScoreDiff=0,0	rs10869497
chr9	77706242	77706243	T	C	MATCH=1;TF=EGR1;ScoreDiff=63	rs1570284
chr9	77738550	77738551	A	T	MATCH=1;TF=Prrx2;ScoreDiff=0	rs3824348
chr9	77744415	77744416	A	G	MATCH=1;TF=SOX10;ScoreDiff=0	rs6560421
chr9	130174443	130174444	G	C	MATCH=1;TF=HNF4A;ScoreDiff=-59	rs7873847
chr9	130213421	130213422	T	C	MATCH=1;TF=Zfx;ScoreDiff=278	rs4837153
chr9	130214413	130214414	C	T	MATCH=2;TF=EGR1,SP2;ScoreDiff=26,17	rs3808831
chr10	1008626	1008627	A	G	MATCH=1;TF=Pax4;ScoreDiff=-58	rs11253536
chr10	1022815	1022816	T	C	MATCH=1;TF=CEBPA;ScoreDiff=-20	rs7094331
chr10	1040137	1040138	G	A	MATCH=1;TF=Stat6;ScoreDiff=42	rs7070724
chr10	1043646	1043647	T	C	MATCH=1;TF=Nkx2-5;ScoreDiff=-5	rs7076107
chr10	1051250	1051251	A	T	MATCH=2;TF=Pdx1,Prrx2;ScoreDiff=0,0	rs7084337
chr10	1054006	1054007	G	T	MATCH=1;TF=FOXA1;ScoreDiff=87	rs11253565
chr10	1054250	1054251	G	A	MATCH=4;TF=E2F6,E2F3,E2F1,E2F4;ScoreDiff=-110,-99,-18,-1	rs11253566
chr10	1055270	1055271	C	T	MATCH=1;TF=GATA2;ScoreDiff=-60	rs10904597
chr10	1057553	1057554	C	A	MATCH=1;TF=PLAG1;ScoreDiff=-370	rs4880754
chr10	1066482	1066483	C	G	MATCH=1;TF=Arnt_Ahr;ScoreDiff=0	rs77737972
chr10	1066709	1066710	C	T	MATCH=1;TF=MZF1_1-4;ScoreDiff=0	rs34407608
chr10	1091194	1091195	G	A	MATCH=1;TF=TAL1_GATA1;ScoreDiff=-2	rs7075141
chr10	114109751	114109752	T	C	MATCH=2;TF=Myog,Tcf12;ScoreDiff=-98,-41	rs11195911
chr10	114109791	114109792	T	C	MATCH=2;TF=E2F3,CTCF;ScoreDiff=165,14	rs11195912
chr10	114109820	114109821	C	G	MATCH=5;TF=Klf4,SP2,KLF5,SP1,Klf1;ScoreDiff=-314,-232,-201,-119,-50	rs11195913
chr10	114109856	114109857	G	A	MATCH=2;TF=Arnt_Ahr,ZNF354C;ScoreDiff=0,0	rs11195915
chr10	114118862	114118863	T	G	MATCH=2;TF=NR3C1,AR;ScoreDiff=-147,-36	rs11195925
chr10	114123945	114123946	C	G	MATCH=1;TF=Arnt;ScoreDiff=0	rs2094266
chr10	114128341	114128342	C	T	MATCH=2;TF=HNF4A,PPARG_RXRA;ScoreDiff=-53,-17	rs34899326
chr10	114130551	114130552	C	T	MATCH=1;TF=MZF1_1-4;ScoreDiff=0	rs10885340
chr10	114136348	114136349	G	C	MATCH=1;TF=SMAD2_SMAD3_SMAD4;ScoreDiff=-82	rs2277208
chr10	114138242	114138243	T	G	MATCH=1;TF=Nr1h3_Rxra;ScoreDiff=96	rs59242079
chr10	114138671	114138672	A	114138658	MATCH=1;TF=ESR2;ScoreDiff=0	rs11195936
chr10	114149304	114149305	T	C	MATCH=1;TF=ZNF263;ScoreDiff=193	rs10885342
chr10	114149478	114149479	C	A	MATCH=1;TF=TCF7L2;ScoreDiff=-127	rs10749118
chr10	114160483	114160484	T	A	MATCH=3;TF=HNF1A,ARID3A,Prrx2;ScoreDiff=159,0,0	rs72821861
chr10	114174953	114174954	T	G	MATCH=1;TF=IRF1;ScoreDiff=-53	rs7904008
chr10	114191014	114191015	C	G	MATCH=1;TF=Stat6;ScoreDiff=-44	rs12414780
chr11	65785489	65785490	T	G	MATCH=1;TF=MZF1_1-4;ScoreDiff=0	rs12416953
chr11	65785505	65785506	C	T	MATCH=1;TF=ARID3A;ScoreDiff=0	rs12421022
chr11	65826703	65826704	G	A	MATCH=2;TF=IRF1,ZNF263;ScoreDiff=282,-133	rs1049872
chr12	6387627	6387628	C	T	MATCH=1;TF=Arnt;ScoreDiff=0	rs7304688
chr12	6387995	6387996	G	C	MATCH=1;TF=Nfe2l2;ScoreDiff=-164	rs73256779
chr12	6390212	6390213	T	C	MATCH=2;TF=MZF1_1-4,ZNF263;ScoreDiff=0,0	rs7305540
chr12	6390919	6390920	G	A	MATCH=1;TF=Zfx;ScoreDiff=-37	rs59632652
chr12	6391484	6391485	T	C	MATCH=1;TF=Bach1_Mafk;ScoreDiff=-156	rs4764553
chr12	6393320	6393321	G	C	MATCH=1;TF=Mafb;ScoreDiff=0	rs7298567
chr12	6393612	6393613	T	C	MATCH=1;TF=Arnt_Ahr;ScoreDiff=0	rs77826268
chr12	6402470	6402471	T	C	MATCH=1;TF=PAX5;ScoreDiff=236	rs60560940
chr12	12617336	12617337	C	A	MATCH=1;TF=ARID3A;ScoreDiff=0	rs7132512
chr12	92826459	92826460	C	A	MATCH=1;TF=Sox5;ScoreDiff=0	rs61935213
chr12	92826489	92826490	C	A	MATCH=2;TF=Nr2e3,SOX10;ScoreDiff=0,0	rs73222044
chr12	109086992	109086993	T	C	MATCH=3;TF=Pdx1,Prrx2,ZNF354C;ScoreDiff=0,0,0	rs17040872
chr12	109087201	109087202	C	G	MATCH=1;TF=SOX10;ScoreDiff=0	rs17040877
chr12	109093712	109093713	C	T	MATCH=2;TF=Pdx1,Prrx2;ScoreDiff=0,0	rs17040895
chr12	109106799	109106800	G	T	MATCH=2;TF=Pdx1,Prrx2;ScoreDiff=0,0	rs78457084
chr12	109117377	109117378	C	A	MATCH=1;TF=Klf1;ScoreDiff=-96	rs12582815
chr12	109121758	109121759	A	G	MATCH=2;TF=Myc,MAX;ScoreDiff=160,18	rs11114040
chr12	109137955	109137956	T	C	MATCH=1;TF=CEBPB;ScoreDiff=-65	rs4964744
chr12	109140890	109140891	A	G	MATCH=2;TF=SP2,SP1;ScoreDiff=-17,0	rs7962155
chr12	109144966	109144967	C	T	MATCH=1;TF=Zfx;ScoreDiff=-5	rs78076981
chr12	109163140	109163141	A	G	MATCH=1;TF=ARID3A;ScoreDiff=0	rs12580426
chr12	109178002	109178003	C	A	MATCH=2;TF=Pdx1,Prrx2;ScoreDiff=0,0	rs3741781
chr12	109180114	109180115	G	T	MATCH=1;TF=ZEB1;ScoreDiff=-81	rs78866567
chr14	100795337	100795338	G	C	MATCH=1;TF=ZNF263;ScoreDiff=0	rs8015259
chr14	100797199	100797200	A	T	MATCH=1;TF=Arnt_Ahr;ScoreDiff=0	rs7143025
chr14	100802872	100802873	T	C	MATCH=1;TF=SOX10;ScoreDiff=0	rs11160582
chr14	100804314	100804315	T	C	MATCH=1;TF=MZF1_1-4;ScoreDiff=0	rs7155068
chr14	100820979	100820980	G	A	MATCH=1;TF=NFATC2;ScoreDiff=0	rs1009812
chr14	100824388	100824389	G	A	MATCH=1;TF=NFATC2;ScoreDiff=0	rs8009578
chr14	100824562	100824563	G	A	MATCH=1;TF=SP2;ScoreDiff=-240	rs8009897
chr14	100829183	100829184	C	T	MATCH=1;TF=NR3C1;ScoreDiff=-31	rs3783346
chr14	100830817	100830818	C	A	MATCH=1;TF=ZNF354C;ScoreDiff=0	rs12888855
chr14	100831773	100831774	G	A	MATCH=1;TF=ZEB1;ScoreDiff=40	rs4541005
chr14	100832281	100832282	C	G	MATCH=4;TF=ESRRA,Esrrb,Nr5a2,ESR1;ScoreDiff=341,145,52,21	rs2146105
chr14	100840289	100840290	C	T	MATCH=4;TF=Ets1,FLI1,Erg,FEV;ScoreDiff=-243,-138,-106,0	rs3994912
chr14	100841007	100841008	G	C	MATCH=1;TF=NHLH1;ScoreDiff=141	rs1957453
chr14	100842058	100842059	A	G	MATCH=1;TF=STAT2_STAT1;ScoreDiff=-40	rs2234518
chr14	100842376	100842377	A	G	MATCH=1;TF=PLAG1;ScoreDiff=-283	rs17554326
chr14	100844419	100844420	G	A	MATCH=1;TF=BRCA1;ScoreDiff=0	rs12897688
chr15	66552065	66552066	G	C	MATCH=1;TF=Nr2e3;ScoreDiff=0	rs75240712
chr15	85207047	85207048	G	A	MATCH=1;TF=Zfx;ScoreDiff=-169	rs8024567
chr16	1876618	1876619	C	T	MATCH=1;TF=Mafb;ScoreDiff=0	rs116869551
chr16	50350209	50350210	G	A	MATCH=1;TF=SP2;ScoreDiff=-151	rs1872691
chr16	50370702	50370703	G	C	MATCH=1;TF=Pdx1;ScoreDiff=0	rs8059133
chr16	50371822	50371823	G	C	MATCH=2;TF=ZNF263,E2F3;ScoreDiff=-229,44	rs9937923
chr16	50372677	50372678	G	A	MATCH=2;TF=NR3C1,AR;ScoreDiff=123,1	rs28633835
chr16	84196201	84196202	A	G	MATCH=4;TF=EGR2,EGR1,SP2,SP1;ScoreDiff=142,128,4,-3	rs11149629
chr16	84202129	84202130	C	T	MATCH=5;TF=E2F3,Zfx,E2F6,E2F1,E2F4;ScoreDiff=-249,-203,-130,-85,-3	rs4782587
chr16	84203355	84203356	T	G	MATCH=2;TF=PPARG_RXRA,NR2C2;ScoreDiff=-317,-49	rs35849241
chr16	84204449	84204450	G	A	MATCH=2;TF=Lhx3,Prrx2;ScoreDiff=184,0	rs4544225
chr16	84206842	84206843	C	G	MATCH=2;TF=Zfx,ZNF354C;ScoreDiff=-1,0	rs4489992
chr16	84207060	84207061	C	T	MATCH=1;TF=PAX5;ScoreDiff=-159	rs7205810
chr16	84207480	84207481	G	T	MATCH=2;TF=IRF1,PRDM1;ScoreDiff=-387,-26	rs4782590
chr16	84208031	84208032	T	G	MATCH=1;TF=FOXO3;ScoreDiff=0	rs3803643
chr16	84209353	84209354	T	A	MATCH=1;TF=RFX5;ScoreDiff=-106	rs12920129
chr16	84209497	84209498	T	C	MATCH=1;TF=STAT2_STAT1;ScoreDiff=0	rs4782899
chr16	84209633	84209634	C	G	MATCH=2;TF=MZF1_1-4,THAP1;ScoreDiff=0,0	rs2288019
chr16	84210935	84210936	C	T	MATCH=1;TF=TEAD1;ScoreDiff=49	rs889655
chr16	84211482	84211483	C	T	MATCH=1;TF=Prrx2;ScoreDiff=0	rs8692
chr16	84211968	84211969	A	C	MATCH=2;TF=USF1,Arnt;ScoreDiff=76,0	rs3208968
chr16	84213433	84213434	A	T	MATCH=1;TF=SP2;ScoreDiff=-46	rs2230129
chr16	84214501	84214502	C	T	MATCH=1;TF=Arnt_Ahr;ScoreDiff=0	rs4150157
chr17	17132201	17132202	G	A	MATCH=1;TF=MZF1_1-4;ScoreDiff=0	rs1736215
chr17	17133120	17133121	G	A	MATCH=1;TF=Rfx1;ScoreDiff=6	rs1613416
chr17	17134527	17134528	T	G	MATCH=2;TF=Lhx3,Prrx2;ScoreDiff=-142,0	rs1736213
chr17	17136890	17136891	C	T	MATCH=3;TF=Nfe2l2,NFE2_MAF,Bach1_Mafk;ScoreDiff=229,214,3	rs10459910
chr17	17140296	17140297	G	A	MATCH=4;TF=SP2,SP1,KLF5,Klf4;ScoreDiff=-381,-346,-253,-236	rs1708629
chr17	17144853	17144854	C	G	MATCH=1;TF=SMAD2_SMAD3_SMAD4;ScoreDiff=75	rs1736207
chr17	17144907	17144908	G	A	MATCH=2;TF=SP1,SP2;ScoreDiff=-135,-58	rs1708626
chr17	17155675	17155676	A	T	MATCH=1;TF=REST;ScoreDiff=-201	rs1736201
chr17	17166462	17166463	G	A	MATCH=1;TF=ZEB1;ScoreDiff=-40	rs62066064
chr17	17179480	17179481	G	A	MATCH=2;TF=Foxo1,NFATC2;ScoreDiff=4,0	rs4985761
chr17	17184096	17184097	C	A	MATCH=1;TF=ZNF263;ScoreDiff=155	rs1029830
chr17	17193214	17193215	C	T	MATCH=2;TF=Arnt,Mycn;ScoreDiff=0,0	rs12452947
chr17	49231179	49231180	A	G	MATCH=1;TF=TP63;ScoreDiff=-16	rs7207370
chr18	13058317	13058318	A	G	MATCH=3;TF=MZF1_5-13,KLF5,MZF1_1-4;ScoreDiff=10,1,0	rs1787008
chr18	13065483	13065484	C	A	MATCH=1;TF=Prrx2;ScoreDiff=0	rs556536
chr18	13066122	13066123	T	C	MATCH=1;TF=SOX10;ScoreDiff=0	rs562151
chr18	13081302	13081303	T	C	MATCH=1;TF=Prrx2;ScoreDiff=0	rs554719
chr18	13087788	13087789	A	G	MATCH=1;TF=ZNF354C;ScoreDiff=0	rs472992
chr18	13087814	13087815	G	A	MATCH=1;TF=Pax4;ScoreDiff=94	rs527839
chr19	36983043	36983044	A	T	MATCH=2;TF=ARID3A,Prrx2;ScoreDiff=0,0	rs2967471
chr19	37007541	37007542	A	G	MATCH=2;TF=SREBF1,SREBF2;ScoreDiff=86,32	rs2967434
chr19	55078667	55078668	T	C	MATCH=1;TF=Mafb;ScoreDiff=0	rs12461739
chr19	55081959	55081960	T	C	MATCH=1;TF=NFYB;ScoreDiff=-91	rs62133363
chr19	55084981	55084982	A	G	MATCH=1;TF=SPIB;ScoreDiff=0	rs28384500
chr21	37481476	37481477	G	A	MATCH=1;TF=Pax4;ScoreDiff=93	rs6517329
chr21	37483001	37483002	G	A	MATCH=2;TF=FLI1,Erg;ScoreDiff=-80,-56	rs11911678
chr21	37483753	37483754	C	T	MATCH=2;TF=ESR1,Arnt_Ahr;ScoreDiff=49,0	rs12151967
chr21	37489889	37489890	T	C	MATCH=3;TF=USF1,USF2,Arnt;ScoreDiff=92,-64,0	rs2835281
chr21	37491045	37491046	C	T	MATCH=1;TF=Zfx;ScoreDiff=-169	rs62229277
chr21	37493421	37493422	G	A	MATCH=2;TF=EGR1,MZF1_5-13;ScoreDiff=-171,-42	rs4817776
chr21	45195110	45195111	A	C	MATCH=1;TF=FOXP1;ScoreDiff=-99	rs13046607
chr21	45195118	45195119	A	C	MATCH=3;TF=RUNX2,RUNX1,FOXP1;ScoreDiff=186,148,-99	rs13046612
chr21	45199149	45199150	G	T	MATCH=1;TF=MAFF;ScoreDiff=-176	rs11910393
chr21	45202240	45202241	T	C	MATCH=1;TF=ARID3A;ScoreDiff=0	rs2096856
chr21	45214580	45214581	G	A	MATCH=5;TF=E2F3,E2F4,E2F6,E2F1,NFIC;ScoreDiff=-129,-83,-71,-36,0	rs2838367
chr21	45215045	45215046	T	C	MATCH=1;TF=NFIC;ScoreDiff=0	rs2838371
chr21	45221398	45221399	A	G	MATCH=1;TF=PAX5;ScoreDiff=-234	rs8128720
chr21	45222057	45222058	A	G	MATCH=1;TF=CTCF;ScoreDiff=-56	rs4818868
chr21	45232321	45232322	T	C	MATCH=1;TF=RORA_1;ScoreDiff=-85	rs9985006
chr21	45234743	45234744	T	G	MATCH=1;TF=SMAD2_SMAD3_SMAD4;ScoreDiff=-39	rs11089098
chr21	45235945	45235946	T	C	MATCH=1;TF=Bhlhe40;ScoreDiff=117	rs7282009
chr21	45236008	45236009	T	C	MATCH=1;TF=REST;ScoreDiff=-179	rs7282144
chr21	45237977	45237978	T	C	MATCH=1;TF=SPIB;ScoreDiff=0	rs2838399
chr21	45238385	45238386	A	C	MATCH=2;TF=EGR2,Arnt_Ahr;ScoreDiff=82,0	rs11702756
chr21	45242480	45242481	A	G	MATCH=1;TF=MZF1_1-4;ScoreDiff=0	rs9974898
chr21	45243863	45243864	C	G	MATCH=2;TF=NHLH1,Tcf3;ScoreDiff=0,0	rs4819316
